# Supplementary material for: The co-expression networks of differentially expressed RBPs with TFs and LncRNAs related to clinical TNM stages of cancers
Source: PeerJ journal article supplement (doi:10.7717/peerj.7696), 2019-09-17

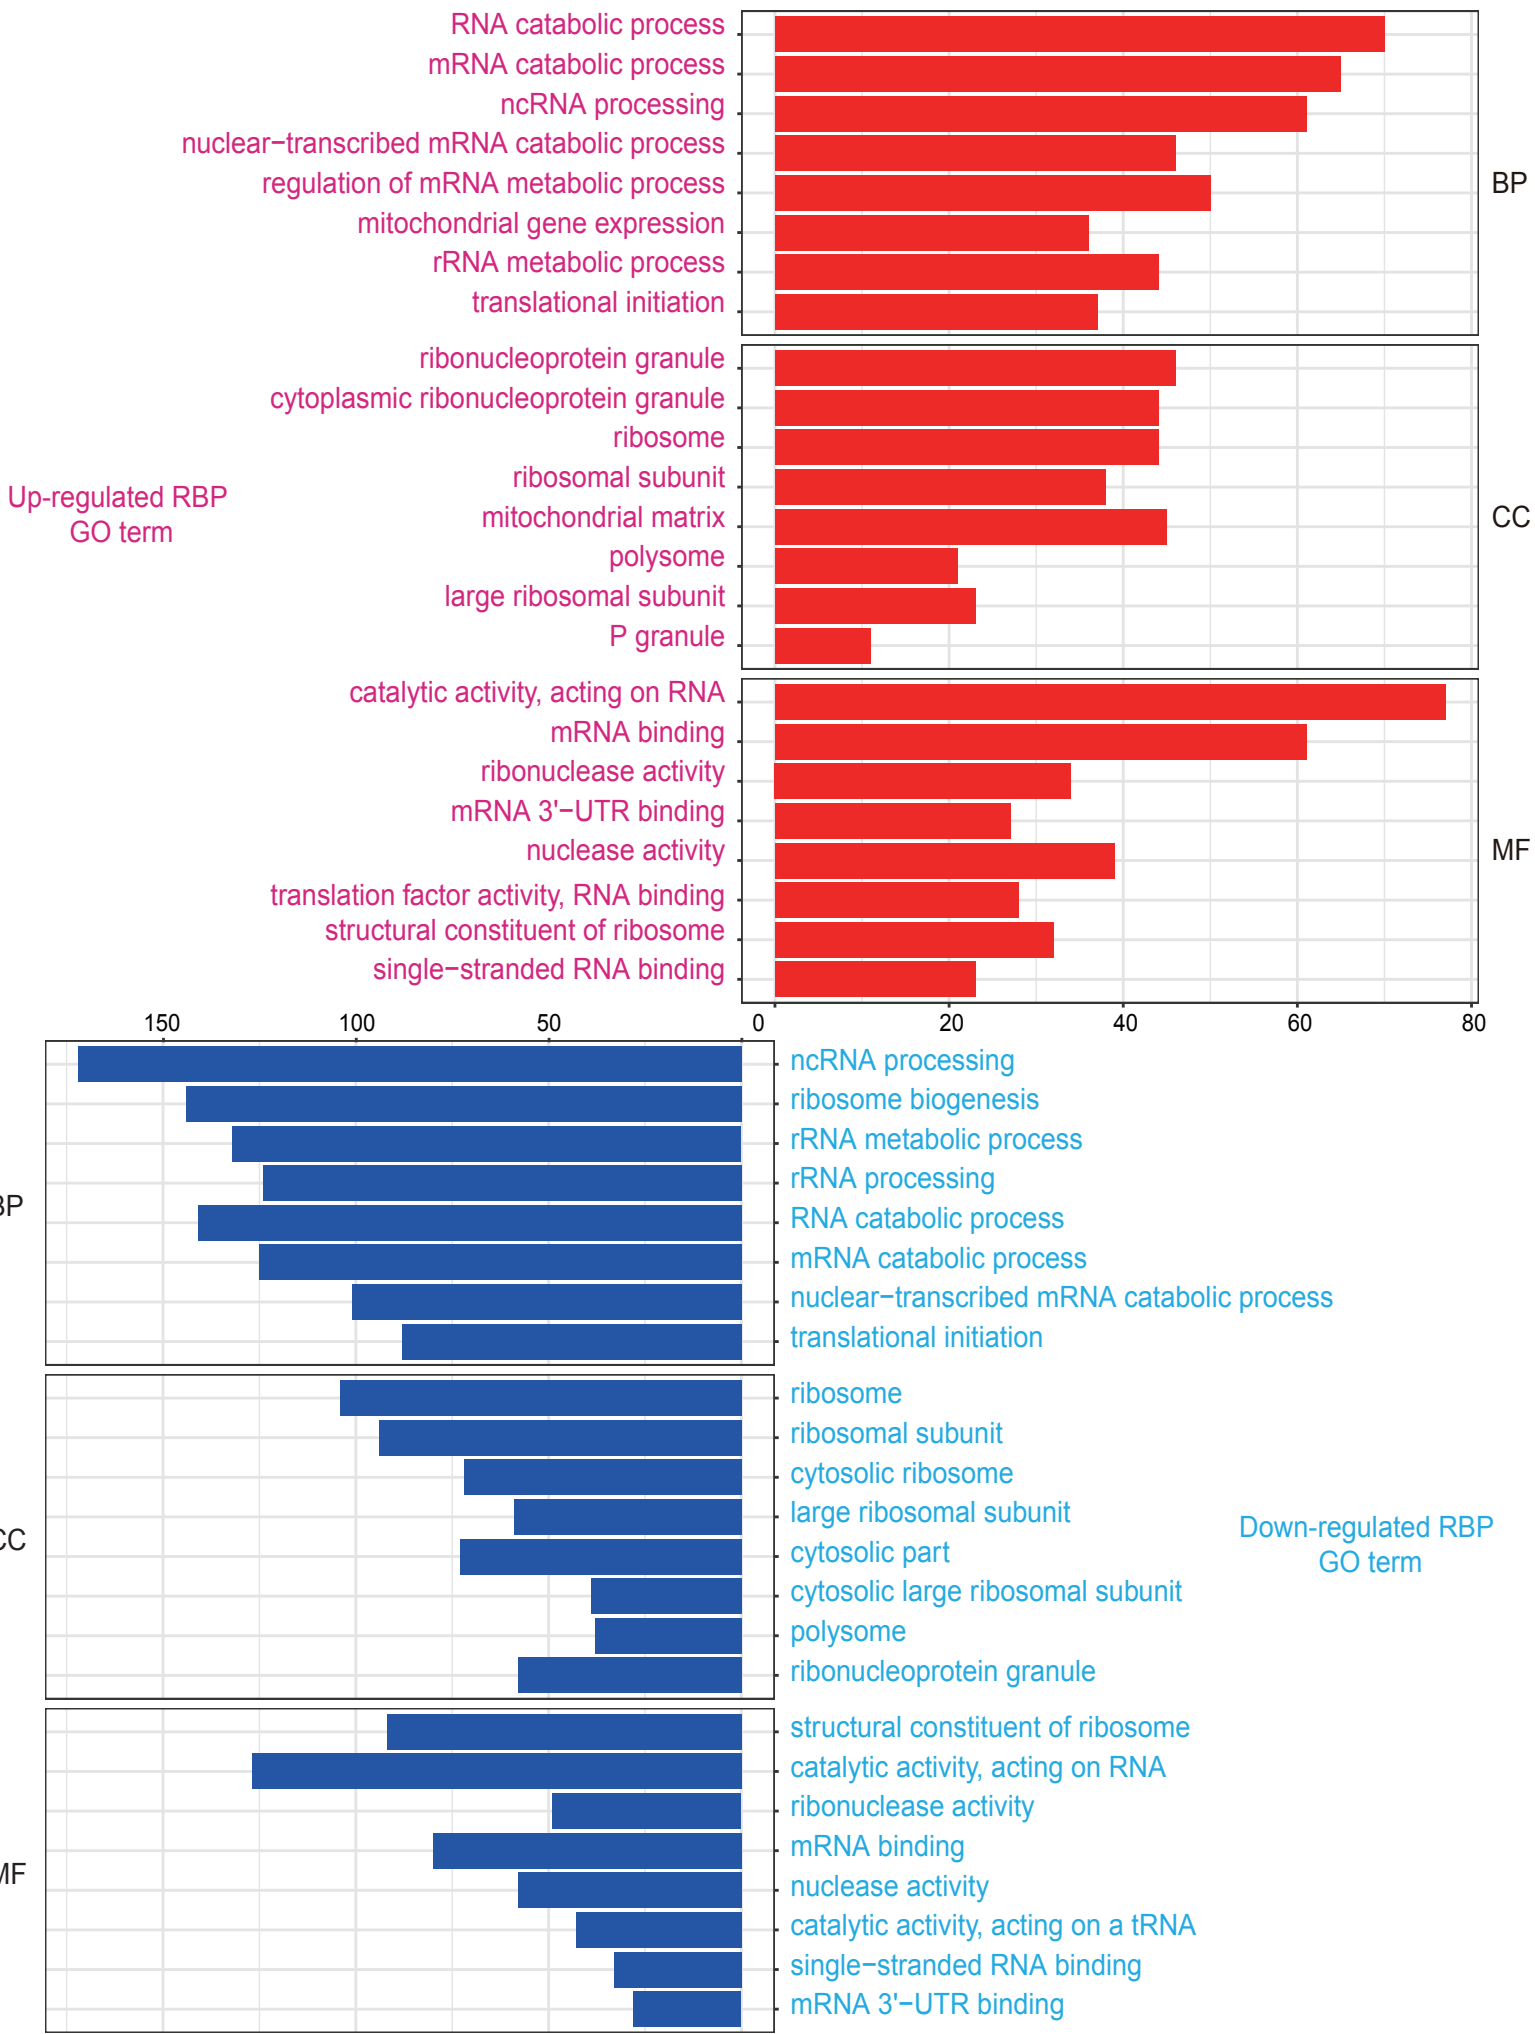

Supplement: FigureS1.pdf [file FigureS1.pdf]
