# Supplementary material for: The co-expression networks of differentially expressed RBPs with TFs and LncRNAs related to clinical TNM stages of cancers
Source: PeerJ. 2019 Sep 17;7:e7696. doi: 10.7717/peerj.7696 (PMC6753928; doi:10.7717/peerj.7696)
Supplement: Table S2 [file peerj-07-7696-s009.xlsx]

## Sheet: Sheet1
Respiratory system							Liver and gall								Nervous system						Alimentary system								Reproductive system								Urinary system
Cluster	Gene Name	Gene ID	LUAD	LUSC	Pearson		Cluster	Gene Name	Gene ID	CHOL	LIHC	Pearson		Cluster	Gene Name	Gene ID	PCPG	GBM	Pearson		Cluster	Gene Name	Gene ID	STAD	READ	COAD	Pearson		Cluster	Gene Name	Gene ID	BRCA	UCEC	CESC	Pearson		Cluster	Gene Name	Gene ID	KICH	KIRC	KIRP	BLCA	Pearson
C1	SMAD6	ENSG00000137834	2.5428	2.79636	0.7329		C1	ANG	ENSG00000214274	4.96936	1.17317	0.6331		C1	NCBP2L	ENSG00000170935	4.07559	1.57475	0.1329		C1	ENDOU	ENSG00000111405	4.83278	1.42825	1.00807	0.6852		C1	NOVA1	ENSG00000139910	0.679503	2.1576	4.77486	0.5808		C1	ENOX1	ENSG00000120658	3.73744	1.98578	1.94259	1.38549	0.5503
	NOVA2	ENSG00000104967	2.38821	3.01671				AZGP1	ENSG00000160862	4.65681	1.58402				CSDC2	ENSG00000172346	4.0251	0.958149				RBPMS2	ENSG00000166831	2.6581	3.66406	3.42105				PABPC5	ENSG00000174740	0.740578	3.65162	4.51447				DZIP1	ENSG00000134874	3.66623	0.461079	0.75653	1.18047
	AFF3	ENSG00000144218	2.38696	3.45955				HRSP12	ENSG00000132541	3.95202	1.2361				PABPN1L	ENSG00000205022	3.58544	0				RBM20	ENSG00000203867	2.31249	3.78145	2.6563				PURG	ENSG00000172733	0.620633	2.97062	4.30897				KHDRBS2	ENSG00000112232	3.64768	2.36882	1.65439	2.04639
	PIH1D3	ENSG00000080572	2.21834	3.00171				RCL1	ENSG00000120158	3.79199	1.47762				KHDRBS2	ENSG00000112232	2.87384	3.93548				RNASE1	ENSG00000129538	2.30441	1.53776	1.08664				RBPMS2	ENSG00000166831	1.65988	1.71794	4.08364				NANOS1	ENSG00000188613	3.49995	1.66244	1.56976	0.933895
	PTRF	ENSG00000177469	2.0407	1.70236				A1CF	ENSG00000148584	3.26526	1.01881				PEG10	ENSG00000242265	2.75742	0.610727				APOBEC2	ENSG00000124701	2.09691	1.45927	1.04739				ZCCHC24	ENSG00000165424	1.52655	3.08897	3.90831				ZC3H12B	ENSG00000102053	1.94584	0.885848	0.583563	1.35528
	NXF3	ENSG00000147206	1.91416	2.41333				RNASE4	ENSG00000258818	3.22382	1.05927				RNASE7	ENSG00000165799	2.48064	0.242561				CPEB1	ENSG00000214575	1.99128	3.85678	3.20045				NOVA2	ENSG00000104967	1.45602	1.47368	3.36768				CSDC2	ENSG00000172346	1.94079	1.41936	1.24405	2.11337
	APOBEC4	ENSG00000173627	1.89258	3.01607				PAIP2B	ENSG00000124374	3.14844	1.40174				LONP1	ENSG00000196365	2.26907	0.120817				RBM24	ENSG00000112183	1.96763	3.21069	1.89061				RNASE4	ENSG00000258818	1.18755	2.22252	3.06876				NYNRIN	ENSG00000205978	1.66505	0.978199	1.18867	0.117384
	IFIT1B	ENSG00000204010	1.83567	0				CPEB3	ENSG00000107864	3.04003	2.28299				MRPS22	ENSG00000175110	1.76384	0.027403				NR0B1	ENSG00000169297	1.88265	1.38531	0				ZCCHC5	ENSG00000179300	1.12001	0	3.0647				ENDOU	ENSG00000111405	1.55618	0.773661	0.797428	2.15054
	TLR8	ENSG00000101916	1.81963	2.29326				CCRN4L	ENSG00000151014	2.8884	1.77549				TDRD10	ENSG00000163239	1.60446	0.769908				AFF3	ENSG00000144218	1.82832	3.85636	3.00655				ZC3H12B	ENSG00000102053	1.33706	2.0502	2.95052				CRYZ	ENSG00000116791	1.54316	0.573976	0.313553	0.340643
	KHDRBS2	ENSG00000112232	1.80082	4.07073				RBMXL2	ENSG00000170748	2.60108	0.478134				TRUB1	ENSG00000165832	1.44323	1.31744				ZFP36	ENSG00000128016	1.81104	0.682929	0.476658				RBPMS	ENSG00000157110	0.915356	1.48367	2.67818				TRDMT1	ENSG00000107614	1.53837	0.0870416	0.462063	0.409449
	TRIM71	ENSG00000206557	1.79876	2.87399				NSUN6	ENSG00000241058	2.477	1.14688				UBAP2	ENSG00000137073	1.3982	0.174163				ELAVL3	ENSG00000196361	1.78652	3.64288	3.40241				PTRF	ENSG00000177469	1.84441	2.96303	2.61273				ZFP36L2	ENSG00000152518	1.26183	0.547811	0.0324787	0.571903
	ADARB1	ENSG00000197381	1.77529	2.20769				NXF3	ENSG00000147206	2.38196	2.93792				RNASE1	ENSG00000129538	1.37659	0.734612				NOVA1	ENSG00000139910	1.77032	3.52155	3.12715				CPEB1	ENSG00000214575	1.50763	3.47579	2.4685				SRSF7	ENSG00000115875	1.20603	0.133843	0.182953	0.0452866
	ZFP36	ENSG00000128016	1.77487	2.48409				NYNRIN	ENSG00000205978	2.33942	0.311651				IREB2	ENSG00000136381	1.36966	0.131063				PAIP2B	ENSG00000124374	1.70217	0.787931	0.599069				SAMD4A	ENSG00000020577	1.66454	2.53897	2.45474				ZCCHC24	ENSG00000165424	1.13953	0.123805	0.64587	2.76254
	L1TD1	ENSG00000240563	1.75506	2.01551				ACO1	ENSG00000122729	2.24826	0.731604				FASTKD5	ENSG00000215251	1.3683	0.20322				SNRPN	ENSG00000128739	1.64983	1.12775	0.988616				RBMS3	ENSG00000144642	2.17529	2.3934	2.39452				PRPF38A	ENSG00000134748	1.11968	0.0964624	0.25417	0.0626739
	RBMS3	ENSG00000144642	1.66506	2.26319				TST	ENSG00000128311	2.23103	0.534839				GTPBP4	ENSG00000107937	1.32904	0.642707				ZCCHC5	ENSG00000179300	1.59614	2.29268	1.35637				HABP4	ENSG00000130956	1.14718	0.822785	2.3546				RBMXL1	ENSG00000213516	1.07139	0.531136	0.768427	0.743592
	NCBP2L	ENSG00000170935	1.50134	0				FAM46A	ENSG00000112773	2.18151	1.4184				REXO1	ENSG00000079313	1.31271	1.26336				ELAVL4	ENSG00000162374	1.50332	3.89008	3.21268				SMAD9	ENSG00000120693	1.3901	1.04367	2.09526				MBNL2	ENSG00000139793	1.01615	0.128292	0.475738	0.75798
	ZCCHC5	ENSG00000179300	1.47768	1.69999				ZCCHC24	ENSG00000165424	2.05713	1.11192				QKI	ENSG00000112531	1.3097	0.266882				DZIP1	ENSG00000134874	1.35371	1.96884	1.2962				CELF2	ENSG00000048740	1.90427	1.83127	2.02614				HABP4	ENSG00000130956	0.992902	0.875728	0.39613	1.52405
	SMAD9	ENSG00000120693	1.47584	2.05483				ZCCHC2	ENSG00000141664	1.86788	0.792832				DDX3Y	ENSG00000067048	1.30178	0.172642				MYEF2	ENSG00000104177	1.33482	0.309584	-0.0375996				DZIP1	ENSG00000134874	0.584798	1.79831	2.00032				PCBP3	ENSG00000183570	0.819941	0.92635	1.13245	1.03214
	PPARGC1B	ENSG00000155846	1.45393	0.408554				LARP1B	ENSG00000138709	1.8356	1.13052				PABPC5	ENSG00000174740	1.29814	0.162976				CELF2	ENSG00000048740	1.32811	0.869845	0.480946				SNRPN	ENSG00000128739	0.0592862	0.315874	1.98293				LRRFIP1	ENSG00000124831	0.749029	0.617814	0.189064	1.20427
	QKI	ENSG00000112531	1.38429	1.27357				SEPSECS	ENSG00000109618	1.80817	0.863183				AUH	ENSG00000148090	1.27656	1.24734				LARP6	ENSG00000166173	1.32285	0.322419	0.0491655				ADARB1	ENSG00000197381	0.489154	1.69425	1.96677				RBMS1	ENSG00000153250	0.743472	0.109779	0.249457	0.248018
	SECISBP2L	ENSG00000138593	1.37903	2.24754				CPEB4	ENSG00000113742	1.73344	0.92359				RBMXL1	ENSG00000213516	1.22917	0.0381572				RBPMS	ENSG00000157110	1.30765	1.02702	0.620474				PCBP3	ENSG00000183570	1.04761	2.60124	1.96332				MTO1	ENSG00000135297	0.648425	0.467947	0.544895	0.275101
	ZNF106	ENSG00000103994	1.33242	1.4246				LARP4	ENSG00000161813	1.68782	0.576715				EIF4G1	ENSG00000114867	1.12438	0.0945514				EIF4E3	ENSG00000163412	1.29665	2.19467	1.84058				CIRBP	ENSG00000099622	0.256776	1.08809	1.92244				DDX3Y	ENSG00000067048	0.618947	0.51665	1.81784	0.858322
	RBMS2	ENSG00000076067	1.23949	2.04811				PUS10	ENSG00000162927	1.6704	0.769278				GRSF1	ENSG00000132463	1.09191	0.459395				ADARB1	ENSG00000197381	1.28394	1.13859	0.57474				BICC1	ENSG00000122870	0.913434	0.868697	1.77588				CDC40	ENSG00000168438	0.601805	0.477327	0.495302	0.248902
	CELF2	ENSG00000048740	1.20717	2.56716				ZCCHC6	ENSG00000083223	1.65771	0.63324				TAF9	ENSG00000085231	1.05974	0.00121119				SMAD9	ENSG00000120693	1.26771	0.921489	0.360366				LARP6	ENSG00000166173	1.62407	0.629483	1.72672				ADARB2	ENSG00000185736	0.601531	0.079675	0.966432	0.942598
	SAMHD1	ENSG00000101347	1.19192	1.76679				NARS2	ENSG00000137513	1.65162	0.1782				URB1	ENSG00000142207	1.04728	0.291103				PTRF	ENSG00000177469	1.26385	1.75322	1.27849				ZFP36	ENSG00000128016	2.19009	2.05669	1.64844				ASH1L	ENSG00000116539	0.573493	0.588318	0.692719	0.853829
	ZC3H12B	ENSG00000102053	1.18735	1.60162				ENDOG	ENSG00000167136	1.63951	0.612967				LARS2	ENSG00000011376	1.01371	0.16385				SIDT2	ENSG00000149577	1.17569	0.861649	1.00611				ANG	ENSG00000214274	0.581204	0.793452	1.64203				DDX21	ENSG00000165732	0.539935	0.111432	0.341724	0.165211
	CTIF	ENSG00000134030	1.18008	1.02573				PPARGC1A	ENSG00000109819	1.61136	1.08288				UTP3	ENSG00000132467	0.979057	0.552209				PABPC5	ENSG00000174740	1.16429	2.36619	1.56668				GLTSCR2	ENSG00000105373	0.51495	0.782331	1.62994				SRBD1	ENSG00000068784	0.489843	0.12317	0.0935381	0.0446127
	EIF4E3	ENSG00000163412	1.12268	1.81655				DDX3Y	ENSG00000067048	1.57776	0.339385				PET112	ENSG00000059691	0.975382	0.792512				ZCCHC24	ENSG00000165424	1.11728	1.56464	1.11869				SIDT2	ENSG00000149577	0.802657	0.684552	1.61674				SNRPN	ENSG00000128739	0.486156	1.27661	1.04474	0.661591
	CPEB1	ENSG00000214575	1.0891	0.453449				MRPL41	ENSG00000182154	1.53236	0.108523				ARHGEF28	ENSG00000214944	0.950906	2.32326				TST	ENSG00000128311	1.11246	0.88383	1.52538				RNASE1	ENSG00000129538	1.45488	0.457033	1.54731				ZC3H10	ENSG00000135482	0.455859	0.0625425	0.00264106	0.312509
	SMAD7	ENSG00000101665	1.0788	1.64348				SETD7	ENSG00000145391	1.50819	0.524865				CPEB4	ENSG00000113742	0.920707	1.3045				TLR3	ENSG00000164342	1.05838	1.87715	2.0852				CELF5	ENSG00000161082	0.534044	1.3735	1.4983				SMAD6	ENSG00000137834	0.453823	0.496146	0.876872	0.0333835
	RBM24	ENSG00000112183	1.06646	0.283505				MRPL34	ENSG00000130312	1.49421	0.508979				ANGEL1	ENSG00000013523	0.908911	0.483892				NANOS1	ENSG00000188613	1.04331	0.701396	0.0392149				PABPC4L	ENSG00000254535	0.650422	1.04181	1.49609				LARP6	ENSG00000166173	0.447918	0.434657	0.136016	0.69556
	SIDT2	ENSG00000149577	1.05725	1.48793				ZFP36	ENSG00000128016	1.47163	2.16528				NUDT16	ENSG00000198585	0.903699	0.616654				ADARB2	ENSG00000185736	1.0181	0.59164	0.42469				RBM43	ENSG00000184898	0.439532	1.42151	1.49458				PNRC2	ENSG00000189266	0.400321	0.696816	0.696173	0.122915
	RNASE13	ENSG00000206150	1.0233	0				SAMD4A	ENSG00000020577	1.4644	0.793202				CMSS1	ENSG00000184220	0.892308	0.0644478				ANG	ENSG00000214274	1.00788	0.962121	0.428406				RBFOX2	ENSG00000100320	0.744603	1.48746	1.448				HBS1L	ENSG00000112339	0.383023	0.450259	0.536205	0.233469
	ZC3H12C	ENSG00000149289	1.02171	0.890365				MRPS28	ENSG00000147586	1.45559	0.0414318				PDE12	ENSG00000174840	0.854105	0.416744				PDCD4	ENSG00000150593	1.007	1.88507	2.06977				POLR2F	ENSG00000100142	0.879443	1.13146	1.4005				SMG6	ENSG00000070366	0.347295	0.588692	0.277768	0.809027
	PABPC5	ENSG00000174740	1.01377	1.56848				SRPR	ENSG00000182934	1.4301	0.55731				YARS	ENSG00000134684	0.806764	0.650384				TDRD10	ENSG00000163239	0.993873	1.44104	1.78819				RPL15	ENSG00000174748	0.411094	0.582734	1.38385				MBNL3	ENSG00000076770	0.288651	0.938201	0.38172	1.1321
	ZCCHC24	ENSG00000165424	1.0102	1.69493				RPP14	ENSG00000163684	1.42003	0.497737				TARS2	ENSG00000143374	0.792136	0.0245692				RPL9	ENSG00000163682	0.976161	0.159062	-0.300428				RPS3A	ENSG00000145425	0.481091	0.885684	1.3827				PARP1	ENSG00000143799	0.256511	0.248719	0.175873	0.0905872
	OASL	ENSG00000135114	1.00833	1.17672				EIF1AY	ENSG00000198692	1.38875	0.0310456				ZCCHC24	ENSG00000165424	0.78342	0.880809				CPEB2	ENSG00000137449	0.960502	1.40389	0.994183				EIF3L	ENSG00000100129	1.01007	0.929679	1.341				WBP4	ENSG00000120688	0.256086	0.0568459	0.185578	0.685571
	PTRH1	ENSG00000187024	1.00456	1.55351				MRPL39	ENSG00000154719	1.37826	0.595445				EARS2	ENSG00000103356	0.757184	0.370382				PTGES3L-AARSD1	ENSG00000108825	0.943999	0.368309	0.315136				RPL9	ENSG00000163682	0.579654	0.540911	1.32981				EIF1AY	ENSG00000198692	0.254491	0.700045	1.70821	0.252913
	PURG	ENSG00000172733	0.94049	0.247443				ZFP36L1	ENSG00000185650	1.37258	1.1116				CDC40	ENSG00000168438	0.736219	1.16624				ENOX1	ENSG00000120658	0.940509	2.00243	1.32636				PTRH1	ENSG00000187024	0.135696	0.457819	1.32333				CNBP	ENSG00000169714	0.251759	0.027193	0.300029	0.435195
	RBMXL2	ENSG00000170748	0.936511	1.69807				PET112	ENSG00000059691	1.36183	0.346587				ADAD2	ENSG00000140955	0.728678	4.2542				CPEB3	ENSG00000107864	0.937703	1.37166	1.41401				EEF1A1	ENSG00000156508	0.576737	0.629694	1.32172				EIF4G3	ENSG00000075151	0.244695	0.398348	0.123899	0.29016
	LRRFIP1	ENSG00000124831	0.90945	1.21296				MRPL46	ENSG00000259494	1.34887	0.611389				FBXO17	ENSG00000104835	0.661391	0.170874				SAMD4A	ENSG00000020577	0.92858	1.88091	1.09606				EIF4E3	ENSG00000163412	1.01233	1.13597	1.31817				ZC3HAV1	ENSG00000105939	0.238018	0.222116	0.218331	0.17459
	TLR7	ENSG00000196664	0.898714	1.80868				MTO1	ENSG00000135297	1.32798	0.407147				MBNL1	ENSG00000152601	0.653576	0.196066				CIRBP	ENSG00000099622	0.923608	0.713465	0.385669				PIWIL4	ENSG00000134627	1.0862	0.840507	1.26902				PSIP1	ENSG00000164985	0.223625	0.1799	0.471585	0.489942
	DDX3Y	ENSG00000067048	0.894116	0.908337				PUS3	ENSG00000110060	1.32454	0.453743				CLK4	ENSG00000113240	0.648721	0.45409				TIPARP	ENSG00000163659	0.90308	0.880365	0.281832				RPL5	ENSG00000122406	0.551955	0.619946	1.25192				CWF19L2	ENSG00000152404	0.205433	0.476313	0.935001	0.749693
	SAMD4A	ENSG00000020577	0.840909	1.59962				MRPL16	ENSG00000166902	1.3024	0.342233				ZC3H3	ENSG00000014164	0.635079	0.275525				RNASE4	ENSG00000258818	0.893243	1.08801	0.581933				RPL3	ENSG00000100316	0.350425	0.0858254	1.24696				AFF1	ENSG00000172493	0.148417	0.416615	0.629053	0.565467
	IFIT2	ENSG00000119922	0.798044	1.24799				ZGPAT	ENSG00000197114	1.3002	0.418251				RBM19	ENSG00000122965	0.6	0.290069				PURG	ENSG00000172733	0.877834	1.45067	0.892008				EIF4B	ENSG00000063046	0.556968	1.02572	1.24311				KIAA0430	ENSG00000166783	0.126984	0.138759	0.363649	0.856449
	TIPARP	ENSG00000163659	0.793518	1.16363				LARS2	ENSG00000011376	1.2987	0.401855				PTBP2	ENSG00000117569	0.599548	1.3595				PTBP2	ENSG00000117569	0.871579	1.73562	0.855125				ZC3H6	ENSG00000188177	0.676456	1.22099	1.23138				IPO5	ENSG00000065150	0.12577	0.304198	0.52686	0.351683
	SRRM4	ENSG00000139767	0.774348	0.426489				TIPARP	ENSG00000163659	1.28848	0.942897				LARP4B	ENSG00000107929	0.595869	1.19925				PABPC4L	ENSG00000254535	0.865474	1.35312	0.356896				RPL34	ENSG00000109475	0.556927	0.243431	1.22666				DZIP3	ENSG00000198919	0.121606	0.206557	0.197245	0.81965
	SBDS	ENSG00000126524	0.764444	0.844205				DCPS	ENSG00000110063	1.25453	0.0290603				RNASEK	ENSG00000219200	0.563673	0.270291				KHDRBS2	ENSG00000112232	0.861216	0	0				ZFP36L2	ENSG00000152518	1.12023	0.864249	1.21457				TNRC6C	ENSG00000078687	0.110446	0.244533	0.243866	1.13605
	RBM44	ENSG00000177483	0.74538	0.691471				EIF5	ENSG00000100664	1.25131	0.71105				GFM1	ENSG00000168827	0.519463	0.162601				RPS25	ENSG00000118181	0.856067	0.14072	-0.187702				RPS23	ENSG00000186468	0.343898	0.82	1.20118				RBM38	ENSG00000132819	0.0773013	0.147952	0.00877266	0.852471
	XPO4	ENSG00000132953	0.736463	0.61677				TRMT10A	ENSG00000145331	1.24198	0.418717				DHX37	ENSG00000150990	0.502709	0.174652				ISG20	ENSG00000172183	0.850047	0.622463	0.822035				CTIF	ENSG00000134030	1.14431	1.17489	1.19246				ACO1	ENSG00000122729	0.0435194	1.15184	1.30118	0.690096
	ZC3H12A	ENSG00000163874	0.724855	0.707569				NUDT16	ENSG00000198585	1.22731	0.238381				CD3EAP	ENSG00000117877	0.480502	0.184522				CPEB4	ENSG00000113742	0.849956	1.22779	0.815738				SETD7	ENSG00000145391	0.902616	2.30054	1.17854				RANBP2	ENSG00000153201	0.0383114	0.776885	0.982392	0.637268
	RAVER2	ENSG00000162437	0.714463	0.128882				CNBP	ENSG00000169714	1.22599	0.714667				HINT3	ENSG00000111911	0.46369	1.32782				FAM46A	ENSG00000112773	0.83955	1.72344	1.08363				WBP4	ENSG00000120688	0.699796	0.846596	1.13504				CTIF	ENSG00000134030	0.0292244	0.79106	1.05131	1.17726
	RNASE4	ENSG00000258818	0.708206	2.3194				GFM1	ENSG00000168827	1.20225	0.403083				ZGPAT	ENSG00000197114	0.455749	0.477835				RBMS3	ENSG00000144642	0.82063	2.28043	1.6259				EIF1B	ENSG00000114784	0.475315	0.846821	1.12691				ZC3H13	ENSG00000123200	0.0163733	0.448895	0.34697	0.737711
	IFIT3	ENSG00000119917	0.682347	1.16451				EEFSEC	ENSG00000132394	1.20031	0.114609				ZNF385A	ENSG00000161642	0.434212	0.182686				RPS3A	ENSG00000145425	0.797667	0.195217	-0.184843				RPS25	ENSG00000118181	0.579532	0.529585	1.12424				EIF1B	ENSG00000114784	0.00921763	0.966041	0.599364	0.703257
	DZIP1L	ENSG00000158163	0.639564	0.0470954				MRPS31	ENSG00000102738	1.18972	0.351131				TRUB2	ENSG00000167112	0.407726	0.312302				ZC3H6	ENSG00000188177	0.797232	0.355896	0.0281692				SBDS	ENSG00000126524	0.796755	1.31339	1.11948				PAPOLB	ENSG00000218823	0	0.696827	0	0
	TLR3	ENSG00000164342	0.630224	1.92235				MRP63	ENSG00000173141	1.18805	0.221551				STAU2	ENSG00000040341	0.402476	1.40919				EIF3L	ENSG00000100129	0.767961	0.434992	0.254511				RSL24D1	ENSG00000137876	0.301342	0.924924	1.10454				DDX53	ENSG00000184735	0	0	0	0
	RNASE1	ENSG00000129538	0.626107	2.82323				MRPL19	ENSG00000115364	1.18627	0.342154				NOL6	ENSG00000165271	0.400594	0.392824				FBLL1	ENSG00000188573	0.760337	0.639471	0.555443				SECISBP2L	ENSG00000138593	0.665383	0.793983	1.06372				APOBEC4	ENSG00000173627	0	0	0	0
	CPEB3	ENSG00000107864	0.614247	1.26976				AUH	ENSG00000148090	1.18561	0.366623				ZNF106	ENSG00000103994	0.385589	0.668319				OASL	ENSG00000135114	0.755367	0.356043	1.49087				RPS13	ENSG00000110700	0.26999	0.3524	1.06347				APOBEC1	ENSG00000111701	0	0	0	0
	EIF1B	ENSG00000114784	0.591184	0.51343				BZW1	ENSG00000082153	1.18222	0.626399				WBP4	ENSG00000120688	0.378772	0.767461				RIOK3	ENSG00000101782	0.726554	1.62945	1.53313				RBMS1	ENSG00000153250	0.89784	1.25267	1.05794				EIF4E1B	ENSG00000175766	0	0	0	0
	PURA	ENSG00000185129	0.589502	0.883542				MRPL32	ENSG00000106591	1.17876	0.501371				TRMT61A	ENSG00000166166	0.375518	0.297832				SECISBP2L	ENSG00000138593	0.721396	1.42501	1.04348				RPL21	ENSG00000122026	0.605961	0.786798	1.05689				NCBP2L	ENSG00000170935	0	0	0	0
	HINT3	ENSG00000111911	0.587379	0.771022				RRBP1	ENSG00000125844	1.16201	0.193965				MBNL2	ENSG00000139793	0.369456	2.14134				MRPL34	ENSG00000130312	0.700368	0.439219	0.354492				REXO2	ENSG00000076043	0.0488748	0.364027	1.05411				PABPN1L	ENSG00000205022	0	0	0	0
	MBNL2	ENSG00000139793	0.573138	1.12239				ESRP2	ENSG00000103067	1.15862	0.677481				SMG9	ENSG00000105771	0.362286	0.148017				PPARGC1B	ENSG00000155846	0.697791	1.36345	1.36314				RPL10A	ENSG00000198755	0.327975	0.392956	1.03939			C2	RALYL	ENSG00000184672	1.19828	0.943227	0.925875	-4.58021	0.0719
	RBMS1	ENSG00000153250	0.562549	0.486827				PAN2	ENSG00000135473	1.1559	0.0153777				FXR1	ENSG00000114416	0.317638	0.136653				A1CF	ENSG00000148584	0.691426	0.892101	1.33993				CWF19L2	ENSG00000152404	0.605467	1.10188	1.02835				A1CF	ENSG00000148584	4.89	0.0775424	2.55119	-3.65557
	PPARGC1A	ENSG00000109819	0.558708	1.54487				PIWIL2	ENSG00000197181	1.15454	0.174532				POLRMT	ENSG00000099821	0.310974	0.274363				CELF4	ENSG00000101489	0.690558	3.26428	2.41053				ZFP36L1	ENSG00000185650	0.645756	1.03194	0.994528				TDRD1	ENSG00000095627	0	0	0	-3.31423
	ARHGEF28	ENSG00000214944	0.533289	0.00952312				PDE12	ENSG00000174840	1.13339	0.282096				TRMU	ENSG00000100416	0.304338	0.0986826				CTIF	ENSG00000134030	0.683709	0.612431	0.30839				PTBP2	ENSG00000117569	0.37971	0.869608	0.994076				DDX25	ENSG00000109832	2.40593	0.85483	2.40644	-2.51425
	CIRBP	ENSG00000099622	0.530597	0.790449				GTF3A	ENSG00000122034	1.12693	0.0498982				C11orf68	ENSG00000175573	0.303588	0.468542				RBFOX2	ENSG00000100320	0.669721	0.778621	0.348454				RPS27A	ENSG00000143947	0.375509	0.280794	0.953509				IFIT1	ENSG00000185745	2.04405	0.257143	1.91261	-2.34182
	CPEB4	ENSG00000113742	0.521113	1.33993				POLR1E	ENSG00000137054	1.11954	0.783278				CD2BP2	ENSG00000169217	0.295839	0.206103				ZNF385A	ENSG00000161642	0.66507	0.418062	0.393353				RBM44	ENSG00000177483	0.644617	0.558593	0.920616				PIWIL1	ENSG00000125207	1.49281	2.95251	1.90357	-1.93964
	C9orf129	ENSG00000204352	0.520105	0.763798				TRUB2	ENSG00000167112	1.11111	0.395534				THOC3	ENSG00000051596	0.292015	0.39139				ACO1	ENSG00000122729	0.664709	0.269481	0.264846				RPS8	ENSG00000142937	0.13268	0.305823	0.91482				PEG10	ENSG00000242265	1.94103	1.91813	2.52191	-1.68452
	RBMXL1	ENSG00000213516	0.516795	0.00962763				GFM2	ENSG00000164347	1.09308	0.0937382				TFIP11	ENSG00000100109	0.282288	0.223649				MRPL33	ENSG00000243147	0.659675	0.56307	-0.00766067				EIF3E	ENSG00000104408	0.226256	0.577842	0.913217				TDRD9	ENSG00000156414	4.72	1.96664	0.346456	-1.53056
	ZFP36L2	ENSG00000152518	0.51652	0.849794				LRRFIP2	ENSG00000093167	1.0735	0.20502				GPATCH4	ENSG00000160818	0.272609	0.5131				SBDS	ENSG00000126524	0.65857	0.674783	0.443699				POLR1E	ENSG00000137054	0.42341	0.768687	0.906708				PNLDC1	ENSG00000146453	2.52771	0.177021	0.37029	-1.17323
	WBP4	ENSG00000120688	0.513626	0.45226				MBNL2	ENSG00000139793	1.07194	1.37866				EIF2B5	ENSG00000145191	0.258926	0.0678032				FAU	ENSG00000149806	0.642558	0.00636966	-0.155218				RPS4X	ENSG00000198034	0.294506	0.24179	0.877801				RBM11	ENSG00000185272	0.00892512	0.860756	0.227577	-1.17226
	SMG6	ENSG00000070366	0.512471	0.511961				TFB1M	ENSG00000029639	1.07146	0.23569				LRRFIP2	ENSG00000093167	0.255024	0.197871				ZMAT5	ENSG00000100319	0.639393	0.0565596	0.156496				PIWIL2	ENSG00000197181	1.07095	1.59532	0.868741				HRSP12	ENSG00000132541	1.80666	1.25002	0.991417	-1.08977
	MBNL1	ENSG00000152601	0.502318	0.57667				OASL	ENSG00000135114	1.0612	1.12052				EIF1B	ENSG00000114784	0.25355	0.48839				RPL41	ENSG00000229117	0.623153	0.2108	-0.116044				MBNL2	ENSG00000139793	1.0687	1.65094	0.86794				ADAD2	ENSG00000140955	2.2401	1.16685	0.462484	-1.08491
	CWF19L2	ENSG00000152404	0.489582	0.22378				NMD3	ENSG00000169251	1.06046	0.544937				DDX10	ENSG00000178105	0.21197	0.624269				RNASEK	ENSG00000219200	0.620524	0.49994	0.727003				MBNL1	ENSG00000152601	0.933198	1.31755	0.856916				CELF3	ENSG00000159409	0.432593	0.0548382	0.157726	-0.779553
	CPEB2	ENSG00000137449	0.47863	0.901803				SIDT2	ENSG00000149577	1.05939	0.24538				SMG5	ENSG00000198952	0.209286	0.613255				RPL5	ENSG00000122406	0.616432	0.224232	-0.282674				MECP2	ENSG00000169057	0.331857	1.04465	0.849124				CNP	ENSG00000173786	0.910418	0.331612	0.0444459	-0.721363
	CSDC2	ENSG00000172346	0.476388	1.41627				ADAD2	ENSG00000140955	1.02306	0.659213				PAPD5	ENSG00000121274	0.207879	1.22443				AUH	ENSG00000148090	0.610341	0.582539	0.751002				SMAD1	ENSG00000170365	0.0851092	0.912387	0.844574				NXF3	ENSG00000147206	0	2.00702	0	-0.625434
	PNRC2	ENSG00000189266	0.47003	0.788404				MRPS22	ENSG00000175110	1.01912	0.201473				WDR5	ENSG00000196363	0.204991	0.0669319				LSMD1	ENSG00000183011	0.601719	0.235241	0.00395316				AFF1	ENSG00000172493	0.622404	0.823508	0.843479				CALR3	ENSG00000269058	0.158198	0.980474	0.56686	-0.616534
	PSIP1	ENSG00000164985	0.467443	0.256428				HBS1L	ENSG00000112339	1.01375	0.340665				IFIT1	ENSG00000185745	0.160612	0.0204382				RPL34	ENSG00000109475	0.592117	0.131773	-0.279243				RPL32	ENSG00000144713	0.234754	0.0516751	0.842934				TDRD5	ENSG00000162782	2.0186	0.903847	1.05132	-0.572805
	TRIM56	ENSG00000169871	0.458297	0.650369				DICER1	ENSG00000100697	1.00292	0.672328				MRPL41	ENSG00000182154	0.153649	0.841138				RPL15	ENSG00000174748	0.59199	0.0277775	-0.237276				ERN1	ENSG00000178607	0.0289665	0.781481	0.837193				MRPS6	ENSG00000243927	0.230048	0.323443	0.0665657	-0.529081
	IFIT5	ENSG00000152778	0.448671	1.10368				EIF1B	ENSG00000114784	0.971438	0.286818				PPAN	ENSG00000130810	0.153637	0.410708				DDX60	ENSG00000137628	0.591828	1.24578	1.58467				RBM7	ENSG00000076053	0.516169	0.377734	0.822338				DHX40	ENSG00000108406	0.391914	0.718855	0.397495	-0.495289
	ZC3H13	ENSG00000123200	0.420447	0.568678				RBMXL1	ENSG00000213516	0.934688	0.943465				MRPS23	ENSG00000181610	0.151718	0.146915				SETD7	ENSG00000145391	0.57856	0.477573	-0.215746				RPL7	ENSG00000147604	0.0820356	0.149423	0.816191				EEF1E1	ENSG00000124802	0.00228678	1.83514	1.91675	-0.459444
	POLR2F	ENSG00000100142	0.412432	0.19851				CSDC2	ENSG00000172346	0.933914	1.09472				PPRC1	ENSG00000148840	0.148018	0.424995				EIF1B	ENSG00000114784	0.578541	0.317285	0.301519				EEF1B2	ENSG00000114942	0.323277	0.226235	0.792663				TRIM71	ENSG00000206557	0.047839	1.01015	0.366098	-0.449387
	ZCCHC2	ENSG00000141664	0.409254	0.601782				CDC40	ENSG00000168438	0.866767	0.594157				EIF5	ENSG00000100664	0.145499	0.495471				QKI	ENSG00000112531	0.572869	1.55329	0.824359				RPS12	ENSG00000112306	0.1404	0.263947	0.792274				NSUN4	ENSG00000117481	0.0623026	0.127948	0.032054	-0.443166
	TRDMT1	ENSG00000107614	0.408273	0.716093				HINT3	ENSG00000111911	0.845017	0.328751				MRPS30	ENSG00000112996	0.141776	0.535285				ATXN1	ENSG00000124788	0.571111	0.736633	0.395881				RPL23	ENSG00000125691	0.0596749	0.176174	0.768033				PRDX1	ENSG00000117450	0.325849	0.729893	0.472946	-0.422072
	AFF1	ENSG00000172493	0.404572	0.971261				TSFM	ENSG00000123297	0.837003	0.230446				RANBP2	ENSG00000153201	0.139486	1.09644				PURA	ENSG00000185129	0.55543	0.753272	0.533105				SMAD5	ENSG00000113658	0.325894	1.03355	0.763396				ILF2	ENSG00000143621	0.0215939	0.234484	0.445192	-0.37912
	RBPMS	ENSG00000157110	0.401856	1.87775				ELAC1	ENSG00000141642	0.833102	0.333202				UNKL	ENSG00000059145	0.123005	0.886746				EEF1A1	ENSG00000156508	0.541817	0.381962	-0.083331				RPL10	ENSG00000147403	0.18151	0.490406	0.758596				EIF4A3	ENSG00000141543	0.383459	0.868698	1.08941	-0.364235
	DZIP3	ENSG00000198919	0.393865	0.471165				CRYZ	ENSG00000116791	0.831368	0.341137				AARS	ENSG00000090861	0.111901	1.17016				SRA1	ENSG00000213523	0.536308	0.174688	0.00716624				SMG6	ENSG00000070366	0.486031	1.02288	0.755228				SNRNP40	ENSG00000060688	0.251804	0.0181507	0.886013	-0.362111
	ZNFX1	ENSG00000124201	0.375816	1.06584				CPEB2	ENSG00000137449	0.826766	0.625384				RRP1	ENSG00000160214	0.107927	0.58084				EEF1A2	ENSG00000101210	0.527712	0.897917	1.18745				SMAD7	ENSG00000101665	0.0490733	0.591785	0.75412				WARS2	ENSG00000116874	0.0975191	0.062129	0.0492825	-0.33115
	TRIM21	ENSG00000132109	0.368976	0.812099				ERN1	ENSG00000178607	0.813823	0.399816				NOC4L	ENSG00000184967	0.103823	0.050128				RBM43	ENSG00000184898	0.51987	1.15133	0.615413				RPS6	ENSG00000137154	0.30325	0.159066	0.742555				SEPSECS	ENSG00000109618	0.819262	0.399714	0.400799	-0.33103
	CCRN4L	ENSG00000151014	0.36445	0.134014				MRPS6	ENSG00000243927	0.804765	0.353669				PPARGC1A	ENSG00000109819	0.100833	0.97509				POLR2F	ENSG00000100142	0.518024	1.95856	0.966978				QKI	ENSG00000112531	1.24305	1.16737	0.724739				LSMD1	ENSG00000183011	0.156494	1.11925	0.64275	-0.325964
	MECP2	ENSG00000169057	0.36243	0.514498				PAPD5	ENSG00000121274	0.797558	0.438746				TNRC6A	ENSG00000090905	0.0921564	0.306927				NUDT16	ENSG00000198585	0.514021	0.43202	0.77005				RPL13A	ENSG00000142541	0.0695398	0.0788413	0.719187				SERBP1	ENSG00000142864	0.257609	0.795668	0.108406	-0.314713
	LRRFIP2	ENSG00000093167	0.35213	0.476107				SMAD1	ENSG00000170365	0.795213	0.768321				RRP12	ENSG00000052749	0.0871244	1.15798				RPS27	ENSG00000177954	0.513299	0.134735	-0.0182429				EEF2	ENSG00000167658	0.301845	0.0824554	0.701605				UPF2	ENSG00000151461	1.64002	0.0679771	0.731041	-0.309704
	ATXN1	ENSG00000124788	0.349655	0.365259				ZCCHC14	ENSG00000140948	0.782366	0.475629				TNRC6B	ENSG00000100354	0.0831164	1.14677				RPS29	ENSG00000213741	0.505304	0.319478	-0.0845209				ZC3H12C	ENSG00000149289	1.45725	1.36187	0.696021				NOL11	ENSG00000130935	1.86972	1.36319	0.0572292	-0.278754
	MBNL3	ENSG00000076770	0.348254	0.349241				WBP4	ENSG00000120688	0.76013	0.410045				IGHMBP2	ENSG00000132740	0.0800385	1.09834				AFF1	ENSG00000172493	0.499793	1.09679	0.88039				RPL6	ENSG00000089009	0.2426	0.238591	0.693498				RPS4Y1	ENSG00000129824	2.00698	1.42988	1.14347	-0.269852
	GLTSCR2	ENSG00000105373	0.326695	0.443929				TLR3	ENSG00000164342	0.756161	1.18476				MATR3	ENSG00000015479	0.0787526	1.18336				DDX25	ENSG00000109832	0.494486	2.25002	1.62165				TARSL2	ENSG00000185418	0.591886	0.767194	0.651357				FTSJ3	ENSG00000108592	0.0853891	0.189126	0.0546713	-0.256173
	FXR2	ENSG00000129245	0.31811	0.294657				EIF2B3	ENSG00000070785	0.728733	0.0408387				HBS1L	ENSG00000112339	0.0715639	1.10664				TARSL2	ENSG00000185418	0.488565	0.297387	0.139136				ZC3H13	ENSG00000123200	0.345655	0.543159	0.647566				MRP63	ENSG00000173141	0.0690737	0.525278	0.158717	-0.23428
	RPL21	ENSG00000122026	0.309886	0.512854				EIF4G1	ENSG00000114867	0.726349	0.229393				SETD7	ENSG00000145391	0.0557965	0.27673				RPL17	ENSG00000265681	0.487956	0.285412	-0.149647				NUDT16	ENSG00000198585	0.403551	0.38419	0.645112				TDRKH	ENSG00000182134	2.04126	2.6015	0.441383	-0.217054
	ELAC1	ENSG00000141642	0.295669	0.0751593				ZC3H13	ENSG00000123200	0.710315	0.508315				RBM34	ENSG00000188739	0.0477343	0.428065				LRRFIP2	ENSG00000093167	0.486546	0.581933	0.895253				RPS20	ENSG00000008988	0.221294	0.00693695	0.645111				MTRF1	ENSG00000120662	2.40394	0.358896	0.107557	-0.188038
	WARS	ENSG00000140105	0.293721	0.582352				DDX60L	ENSG00000181381	0.708262	0.746684				NSUN6	ENSG00000241058	0.0439798	1.13498				DQX1	ENSG00000144045	0.484095	0.592487	1.0631				RBMS2	ENSG00000076067	1.13188	0.679482	0.644897				TEFM	ENSG00000172171	0.0459583	0.125629	0.0557798	-0.156169
	TNRC6C	ENSG00000078687	0.290919	0.416814				MARS2	ENSG00000247626	0.68327	0.157846				FXR2	ENSG00000129245	0.0283729	1.26037				ELAC1	ENSG00000141642	0.469642	1.0844	0.715264				DZIP1L	ENSG00000158163	0.919924	0.954193	0.613689				NOLC1	ENSG00000166197	0.122414	0.16256	0.295784	-0.154035
	DDX24	ENSG00000089737	0.290368	0.370599				ZC3H12C	ENSG00000149289	0.677509	0.801373				IARS	ENSG00000196305	0.0208	0.0129494				RPS10	ENSG00000124614	0.457189	0.00124831	-0.228445				RPL27	ENSG00000131469	0.119839	0.137789	0.588619				NXT2	ENSG00000101888	0.0374316	0.747192	0.5623	-0.153681
	NUDT16	ENSG00000198585	0.2898	0.560348				SECISBP2L	ENSG00000138593	0.656583	0.544048				SECISBP2L	ENSG00000138593	0.0188685	2.01684				FXR2	ENSG00000129245	0.442477	0.265564	0.292592				DDX24	ENSG00000089737	0.231516	0.446287	0.581184				PARP4	ENSG00000102699	0.0800338	0.310005	0.134361	-0.12712
	HABP4	ENSG00000130956	0.281802	0.873244				RIOK3	ENSG00000101782	0.654748	0.309454				DDX26B	ENSG00000165359	0.00857359	0.272044				MECP2	ENSG00000169057	0.439646	0.224703	0.14474				NYNRIN	ENSG00000205978	0.677574	1.05532	0.580154				TRMT6	ENSG00000089195	0.20401	0.1193	0.0266441	-0.12117
	ZC3H6	ENSG00000188177	0.271476	0.667006				MRPL37	ENSG00000116221	0.652725	0.39229				DDX4	ENSG00000152670	0	1.86219				MBNL1	ENSG00000152601	0.420596	1.3593	0.915091				KIAA0430	ENSG00000166783	0.414052	0.899539	0.562484				TRMT10A	ENSG00000145331	0.798976	0.113657	0.188779	-0.120618
	RPS27L	ENSG00000185088	0.263733	1.03212				QKI	ENSG00000112531	0.652378	0.554682				ESRP1	ENSG00000104413	0	1.33805				RPS23	ENSG00000186468	0.417135	0.149519	-0.130596				RPL24	ENSG00000114391	0.00912511	0.159354	0.558849				TFB1M	ENSG00000029639	1.34527	1.65731	2.25428	-0.117592
	PAPD5	ENSG00000121274	0.26365	0.324125				RBMS3	ENSG00000144642	0.646325	1.52983				RNF17	ENSG00000132972	0	0.837562				KIAA0430	ENSG00000166783	0.41249	0.682729	0.598979				UNKL	ENSG00000059145	0.20107	0.754003	0.558499				SF3B14	ENSG00000115128	0.805656	0.122288	0.0618256	-0.115452
	TDRD10	ENSG00000163239	0.260074	3.05856				FASTKD5	ENSG00000215251	0.639932	0.147858				TDRD15	ENSG00000218819	0	0				CNBP	ENSG00000169714	0.409596	0.167879	-0.0196768				TDRD10	ENSG00000163239	1.96354	2.11762	0.528999				GTPBP4	ENSG00000107937	0.438184	0.27251	0.0876745	-0.0755259
	SNRPN	ENSG00000128739	0.250312	0.983569				TLR8	ENSG00000101916	0.627604	0.855144				RNF113B	ENSG00000139797	0	0				EIF4B	ENSG00000063046	0.399331	0.0379045	-0.250698				RPP14	ENSG00000163684	0.17197	0.3754	0.523781				TFB2M	ENSG00000162851	0.634411	0.125909	0.334614	-0.0745204
	EIF3L	ENSG00000100129	0.249689	0.0813041				SBDS	ENSG00000126524	0.625652	0.351761				APOBEC1	ENSG00000111701	0	0				RBM47	ENSG00000163694	0.395274	1.15231	1.30245				RPS15A	ENSG00000134419	0.137665	0.501127	0.52091				MRPS23	ENSG00000181610	0.575966	0.0154461	1.13766	-0.069101
	EEF1A1	ENSG00000156508	0.249227	0.244565				TRMT10C	ENSG00000174173	0.618648	0.0895749				SARS2	ENSG00000269547	0	0				MRPS6	ENSG00000243927	0.385497	0.433686	0.129381				ACO1	ENSG00000122729	2.01265	0.403228	0.513485				GEMIN2	ENSG00000092208	0.141688	0.116055	0.185107	-0.0572974
	UTP3	ENSG00000132467	0.22154	0.31091				DDX28	ENSG00000182810	0.597044	0.235801				DDX53	ENSG00000184735	0	0				RAVER2	ENSG00000162437	0.381844	1.01101	1.15845				PURA	ENSG00000185129	0.66584	0.956722	0.500594				XPO5	ENSG00000124571	3.13238	2.52876	2.60329	-0.0434179
	ANG	ENSG00000214274	0.216914	1.85759				RARS2	ENSG00000146282	0.587357	0.0738872				DAZL	ENSG00000092345	0	0				ZC3H12C	ENSG00000149289	0.378708	1.51267	1.42063				ANGEL1	ENSG00000013523	0.14575	0.217627	0.500404				NARS2	ENSG00000137513	0.192099	0.145158	0.579792	-0.0286281
	RBM43	ENSG00000184898	0.213606	0.86565				MTRF1	ENSG00000120662	0.586143	0.129373				APOBEC4	ENSG00000173627	0	0				EIF4A2	ENSG00000156976	0.360412	0.408794	-0.0814266				PSIP1	ENSG00000164985	0.143907	0.801576	0.46388				PIWIL2	ENSG00000197181	4.97	4.67	-4.74	0
	RPP14	ENSG00000163684	0.209688	0.185301				EIF5AL1	ENSG00000253626	0.57812	0.37256				ZCCHC5	ENSG00000179300	0	0				ZC3H10	ENSG00000135482	0.358963	0.455142	0.392285				NXF3	ENSG00000147206	0.0123306	1.9909	0.460669				PNPT1	ENSG00000138035	0.0790997	0.244072	-1.61185	-1.57099
	RNASEL	ENSG00000135828	0.201849	0.439164				RBM7	ENSG00000076053	0.551419	0.833617			C2	TERT	ENSG00000164362	0	-4.94398	-0.0063			SMG6	ENSG00000070366	0.351467	0.715802	0.666821				CPEB4	ENSG00000113742	0.125266	0.708858	0.422481				C1QBP	ENSG00000108561	0.303367	0.148205	-0.862524	-0.779242
	AUH	ENSG00000148090	0.198008	0.385987				KIAA0391	ENSG00000100890	0.546998	0.285366				IGF2BP1	ENSG00000159217	1.05741	-4.7				RPS15A	ENSG00000134419	0.337104	0.16193	-0.267656				EIF4A2	ENSG00000156976	0.368711	0.776755	0.416059				DDX31	ENSG00000125485	0	1.17396	-0.785879	0
	RNASEK	ENSG00000219200	0.197852	0.293529				ERI2	ENSG00000196678	0.533579	0.146272				IGF2BP2	ENSG00000073792	2.31803	-3.96412				C9orf129	ENSG00000204352	0.328269	0.609138	0				METTL10	ENSG00000203791	0.0296708	0.264335	0.412103				WDR12	ENSG00000138442	0	0.386393	-0.763247	-4.66
	RBM7	ENSG00000076053	0.187216	0.309105				PURA	ENSG00000185129	0.527082	0.409741				HNRNPCL1	ENSG00000179172	0	-3.72956				HINT3	ENSG00000111911	0.327558	0.440188	0.0956858				CXorf23	ENSG00000173681	0.214749	0.439462	0.404782				EIF2B3	ENSG00000070785	0.307528	0.186463	-0.661995	-0.643928
	PDE12	ENSG00000174840	0.186101	0.486294				EIF5A	ENSG00000132507	0.505654	0.485773				RNASE2	ENSG00000169385	2.15489	-3.72375				PET112	ENSG00000059691	0.327533	0.266312	0.119161				ZNF106	ENSG00000103994	1.63924	0.896991	0.395466				METTL10	ENSG00000203791	0.138791	0.338573	-0.610444	-0.653045
	TDRD6	ENSG00000180113	0.171552	0.70608				UTP3	ENSG00000132467	0.501404	0.579753				EIF5AL1	ENSG00000253626	0.946248	-3.70358				RPS27L	ENSG00000185088	0.314789	0.806955	0.220419				PNRC2	ENSG00000189266	0.0116624	0.440341	0.382159				MRPL19	ENSG00000115364	0.0686235	0.0258735	-0.573932	-0.298966
	ZC3HAV1	ENSG00000105939	0.169015	0.361356				IFIT1	ENSG00000185745	0.491802	1.12579				CALR3	ENSG00000269058	0	-3.68875				MRPL46	ENSG00000259494	0.313721	0.44207	0.202803				CNBP	ENSG00000169714	0.193728	0.546925	0.373199				TST	ENSG00000128311	0.72245	0.0345406	-0.527953	-0.360225
	ZC3H10	ENSG00000135482	0.16315	0.255478				PNRC2	ENSG00000189266	0.483421	0.259386				PIH1D3	ENSG00000080572	0	-3.25234				LRRFIP1	ENSG00000124831	0.305466	0.555367	0.26262				RPL17	ENSG00000265681	0.301633	0.485394	0.37272				URB2	ENSG00000135763	1.29536	0.195596	-0.517232	-0.153633
	MRPS31	ENSG00000102738	0.162357	0.11866				DDX24	ENSG00000089737	0.475349	0.232724				RPLP0	ENSG00000089157	0.834082	-2.95754				RBMS1	ENSG00000153250	0.304358	0.691506	0.354303				IPO5	ENSG00000065150	0.324869	0.263895	0.372689				TSEN2	ENSG00000154743	0.212783	0.310816	-0.486053	-0.314931
	RNASE6	ENSG00000169413	0.161208	0.887664				ENDOU	ENSG00000111405	0.45015	0.514425				TLR8	ENSG00000101916	0.192803	-2.90608				SRRM4	ENSG00000139767	0.302939	1.70831	0.98455				AUH	ENSG00000148090	0.521897	0.189148	0.36657				USP39	ENSG00000168883	0.61848	0.122483	-0.464426	-0.600928
	RPL15	ENSG00000174748	0.159882	0.313039				EIF2S1	ENSG00000134001	0.44187	0.193292				METTL1	ENSG00000037897	1.03426	-2.80984				SMAD7	ENSG00000101665	0.296189	0.757925	0.982746				TNRC6A	ENSG00000090905	0.208315	0.59552	0.36288				EPRS	ENSG00000136628	0.208754	0.0866091	-0.46439	-0.546211
	RBM20	ENSG00000203867	0.122624	0.299783				IREB2	ENSG00000136381	0.437935	0.344471				RPS3A	ENSG00000145425	0.297238	-2.79654				PSIP1	ENSG00000164985	0.294901	0.556675	0.077247				TRIM56	ENSG00000169871	0.486672	0.94062	0.362562				CPSF3	ENSG00000119203	0.379363	0.0857875	-0.450478	-0.14401
	DCP1B	ENSG00000151065	0.118418	0.315904				ADARB1	ENSG00000197381	0.432278	0.0553966				RNASE3	ENSG00000169397	1.45176	-2.76845				RPL10L	ENSG00000165496	0.294713	1.74557	2.07367				RPS27L	ENSG00000185088	0.0473874	0.175404	0.34076				R3HDM1	ENSG00000048991	0.304155	0.0515256	-0.371626	-0.672425
	POLR2L	ENSG00000177700	0.114307	0.58334				EIF4E3	ENSG00000163412	0.428648	1.1607				RBM47	ENSG00000163694	4.60669	-2.73921				RPP14	ENSG00000163684	0.278605	0.228068	0.132302				PPARGC1A	ENSG00000109819	1.18791	0.189245	0.332185				CNOT6	ENSG00000113300	1.20201	0.609432	-0.361837	-0.930544
	SRBD1	ENSG00000068784	0.102871	0.180524				NCBP1	ENSG00000136937	0.428421	0.257779				RPL39	ENSG00000198918	0.796062	-2.60829				DDX24	ENSG00000089737	0.266465	0.154914	0.0436778				EIF5A2	ENSG00000163577	0.424507	0.76133	0.265775				GPATCH4	ENSG00000160818	1.11746	0.582775	-0.325976	-0.240171
	PARP4	ENSG00000102699	0.101638	0.800788				TNRC6A	ENSG00000090905	0.422187	0.257448				NSUN7	ENSG00000179299	1.14768	-2.6024				TNRC6B	ENSG00000100354	0.261851	0.441622	0.420959				TNRC6B	ENSG00000100354	0.372737	0.343752	0.241884				FBLL1	ENSG00000188573	0.110225	0.0308593	-0.324269	-0.634415
	EIF1AY	ENSG00000198692	0.0929942	0.462167				RNASE3	ENSG00000169397	0.394501	0				RBM46	ENSG00000151962	0	-2.56472				DHX32	ENSG00000089876	0.259044	0.543607	0.334862				PAIP2B	ENSG00000124374	0.779273	0.600221	0.193645				PSTK	ENSG00000179988	0.46656	0.0712168	-0.316911	-0.820325
	RANBP2	ENSG00000153201	0.0918355	0.197883				RPS27L	ENSG00000185088	0.392301	0.176317				RPS2	ENSG00000140988	0.275608	-2.42485				RSL24D1	ENSG00000137876	0.252859	0.291538	-0.486403				HINT3	ENSG00000111911	0.117171	0.0193015	0.158485				ERI1	ENSG00000104626	0	0.261906	-0.316025	-0.0934343
	DDX60	ENSG00000137628	0.0759395	0.762081				PATL1	ENSG00000166889	0.391717	0.447592				YBX1	ENSG00000065978	1.26274	-2.3743				NOP10	ENSG00000182117	0.240886	0.1005	-0.146611				ZCCHC14	ENSG00000140948	0.182072	0.72071	0.156838				NOL10	ENSG00000115761	0.422994	0.318974	-0.314194	-0.0474015
	PRPF38A	ENSG00000134748	0.0737358	0.0453092				CLK4	ENSG00000113240	0.382215	0.064239				RNASE6	ENSG00000169413	1.14877	-2.34346				MRPL49	ENSG00000149792	0.238192	0.0180253	-0.102172				ASH1L	ENSG00000116539	0.087779	0.724889	0.150409				PTBP3	ENSG00000119314	0.367624	0.0030807	-0.295421	-0.470028
	ZCCHC14	ENSG00000140948	0.0734792	0.206747				SERBP1	ENSG00000142864	0.370882	0.252424				RPL18A	ENSG00000105640	0.171462	-2.33373				RBM38	ENSG00000132819	0.237845	0.681528	0.354559				MRPS31	ENSG00000102738	0.309506	0.192601	0.146167				NUFIP1	ENSG00000083635	0.834555	0.178494	-0.252697	-0.159149
	ERN1	ENSG00000178607	0.0574908	1.00169				METTL10	ENSG00000203791	0.364397	0.271328				SNRPG	ENSG00000143977	0.766856	-2.27299				MVP	ENSG00000013364	0.232017	0.382012	0.93214				ZMAT3	ENSG00000172667	0.612594	0.785657	0.135787				CMSS1	ENSG00000184220	0.0438322	0.133677	-0.224212	-0.498233
	MRPL14	ENSG00000180992	0.0542166	0.346061				TDRD1	ENSG00000095627	0.350614	0.252676				EEF1A1	ENSG00000156508	0.872538	-2.22682				TRNAU1AP	ENSG00000180098	0.224639	0.315384	-0.0333956				CLK4	ENSG00000113240	0.684098	0.854153	0.129162				MRPL49	ENSG00000149792	0.551072	0.41955	-0.217798	-0.305649
	LARP4B	ENSG00000107929	0.0475025	0.248309				ATXN1	ENSG00000124788	0.337064	0.0700599				TRIM21	ENSG00000132109	0.11663	-2.20685				MBNL2	ENSG00000139793	0.222362	0.330445	-0.066044				URB1	ENSG00000142207	0.048511	0.515089	0.100556				ZGPAT	ENSG00000197114	0.498282	0.741562	-0.189337	-1.27164
	KIAA0430	ENSG00000166783	0.0369336	0.450428				G3BP2	ENSG00000138757	0.326025	0.41972				RPS5	ENSG00000083845	0.670206	-2.20321				TFIP11	ENSG00000100109	0.211291	0.0449812	0.314743				RPS29	ENSG00000213741	0.115307	0.0200564	0.0661227				DARS2	ENSG00000117593	1.12709	0.285806	-0.179275	-0.163258
	CLK4	ENSG00000113240	0.0347568	0.594406				NSUN2	ENSG00000037474	0.313179	0.12189				APOBEC3F	ENSG00000128394	0.22703	-2.19278				PPIL3	ENSG00000240344	0.210477	0.0743031	-0.526999				MTO1	ENSG00000135297	0.0385208	0.225257	0.0615919				AZGP1	ENSG00000160862	0.36226	0.159319	-0.1422	-0.270348
	DYNC1H1	ENSG00000197102	0.0282803	0.0149986				AFF1	ENSG00000172493	0.311524	0.622476				RPS15A	ENSG00000134419	0.586506	-2.17054				PUS10	ENSG00000162927	0.206189	0.254453	0.31837				ENOX2	ENSG00000165675	0.0753993	0.644379	0.0228887				LIN28B	ENSG00000187772	0.526769	0.152701	-0.0826893	-0.571667
	ANGEL1	ENSG00000013523	0.0275566	0.132187				CARS2	ENSG00000134905	0.295033	0.00972548				NXF3	ENSG00000147206	0.814828	-2.16152				RNASEL	ENSG00000135828	0.204122	1.07024	1.33735				NOB1	ENSG00000141101	0.411014	0.134569	0.00536847				DAZL	ENSG00000092345	0.476936	0.114022	-0.0612373	-0.448338
	OAS2	ENSG00000111335	0.0248858	0.37883				MRPS35	ENSG00000061794	0.281403	0.152272				RPS10	ENSG00000124614	0.720217	-2.11257				CLK4	ENSG00000113240	0.20394	0.0884404	-0.00340357				APOBEC4	ENSG00000173627	0	0.306347	0				PIH1D3	ENSG00000080572	0.132788	0.261551	-0.0532981	-0.379536
	RPS4Y1	ENSG00000129824	0.0237865	0.456738				CARHSP1	ENSG00000153048	0.259831	0.200625				RPL10L	ENSG00000165496	0	-2.09889				LSM1	ENSG00000175324	0.185712	0.283058	-0.0041298				RALYL	ENSG00000184672	0	0.682377	0				LIN28A	ENSG00000131914	0.208463	0.273974	-0.0431651	-0.369274
	GSPT1	ENSG00000103342	0.0231951	0.14361				DAZL	ENSG00000092345	0.251693	0				PABPC3	ENSG00000151846	0.260248	-2.08964				ZNF106	ENSG00000103994	0.175765	0.910239	0.598083				RBM46	ENSG00000151962	0.571343	0	0				HNRNPCL1	ENSG00000179172	0.649089	0.186355	-0.000203937	-0.133732
	INTS9	ENSG00000104299	0.0199159	0.142076				MRPS30	ENSG00000112996	0.250591	0.143784				RPS19	ENSG00000105372	0.476377	-2.07617				TNRC6C	ENSG00000078687	0.173266	0.146602	0.03883				CELF6	ENSG00000140488	0.434213	0	0			C3	C2orf15	ENSG00000241962	0	-4.62	0	-3.37345	-0.0794
	CELF6	ENSG00000140488	0.0161558	0.520368				OAS1	ENSG00000089127	0.240428	0.763929				RPL22L1	ENSG00000163584	0.434096	-2.07537				CWF19L2	ENSG00000152404	0.168881	0.381597	0.180237				PAPOLB	ENSG00000218823	1.35346	0	0				ERN2	ENSG00000134398	0	-3.52156	-1.93877	0
	RPL34	ENSG00000109475	0.0120467	0.367737				SRBD1	ENSG00000068784	0.239889	0.24599				YBX3	ENSG00000060138	2.28576	-2.04636				MRPL39	ENSG00000154719	0.166307	0.146005	0.0204932				RNASE13	ENSG00000206150	1.45516	0	0				RBMXL2	ENSG00000170748	0.371384	-3.27847	-2.23086	-0.745798
	ZCCHC6	ENSG00000083223	0.0100345	0.0600468				R3HDM2	ENSG00000179912	0.234959	0.12111				RPS7	ENSG00000171863	0.224635	-2.02664				INTS12	ENSG00000138785	0.155908	0.0949756	-0.0164931				RBFOX1	ENSG00000078328	1.92536	1.90845	0				NANOS3	ENSG00000187556	0.0752609	-2.82587	-1.87602	-0.991152
	PAIP2B	ENSG00000124374	0.00150603	0.182093				NUFIP1	ENSG00000083635	0.207803	0.0647586				SNRPE	ENSG00000182004	0.356066	-1.98285				SLIRP	ENSG00000119705	0.143102	0.0517132	-0.293443				SARS2	ENSG00000269547	0	0	0				CARHSP1	ENSG00000153048	0	-2.65795	0	0
	LUC7L2	ENSG00000269955	0	0.153217				RBM47	ENSG00000163694	0.204493	0.544899				NXT2	ENSG00000101888	1.73579	-1.97755				SRSF12	ENSG00000154548	0.133504	1.11028	0.586873				EIF1AY	ENSG00000198692	0	0	0				MAEL	ENSG00000143194	0.659865	-2.25914	-1.04688	-0.78195
	PABPN1L	ENSG00000205022	0	0.328057				INTS12	ENSG00000138785	0.190411	0.167536				TLR3	ENSG00000164342	2.22894	-1.9768				MTO1	ENSG00000135297	0.132108	0.03329	-0.0372318				RPS4Y1	ENSG00000129824	0	0	0				ZC3HAV1L	ENSG00000146858	0.949743	-2.12352	-1.38917	-2.32725
	TDRD15	ENSG00000218819	0	0				CARS	ENSG00000110619	0.180586	0.0865831				RPL29	ENSG00000162244	1.21638	-1.90459				ASH1L	ENSG00000116539	0.122119	0.530209	0.41131				PIWIL3	ENSG00000184571	0	0	0				DDX43	ENSG00000080007	0.22535	-2.04082	-0.446925	-2.10024
	SARS2	ENSG00000269547	0	0				ELAC2	ENSG00000006744	0.180324	0.242657				RPS14	ENSG00000164587	0.152595	-1.84862				RALYL	ENSG00000184672	0.121458	0	0				APOBEC1	ENSG00000111701	0	0	0				ZNF239	ENSG00000196793	0	-1.86245	0	-4.62
	PAPOLB	ENSG00000218823	0	0				ZMAT3	ENSG00000172667	0.179514	0.249591				RPS26	ENSG00000197728	0.468593	-1.84728				PNRC2	ENSG00000189266	0.103364	0.65607	0.476162				DDX3Y	ENSG00000067048	0	0	0				SPATS2L	ENSG00000196141	0.69571	-1.66767	-0.639508	-0.0642718
	PIWIL3	ENSG00000184571	0	0				GSPT1	ENSG00000103342	0.156145	0.189856				RPS29	ENSG00000213741	0.367534	-1.77877				LSM11	ENSG00000155858	0.100429	0.156232	-0.0612512				DDX53	ENSG00000184735	0	0	0				CELF6	ENSG00000140488	0.970605	-1.51074	-1.15408	-0.149422
	EIF4E1B	ENSG00000175766	0	0				ZC3H6	ENSG00000188177	0.144003	0.167379				RPS16	ENSG00000105193	0.244945	-1.75666				RBMXL1	ENSG00000213516	0.0943175	0.225827	0.0295932				TDRD15	ENSG00000218819	0	0	0				RPL3L	ENSG00000140986	1.29964	-1.42301	-0.00847928	0
	DDX53	ENSG00000184735	0	0				C1QBP	ENSG00000108561	0.131153	0.108665				RPL10	ENSG00000147403	0.484567	-1.75336				EIF4G3	ENSG00000075151	0.0934056	0.46963	0.587858			C2	APOBEC2	ENSG00000124701	3.4228	0.6076	-0.688438	-0.0161			IFIT1B	ENSG00000204010	0	-1.40661	0	0
	NXF5	ENSG00000126952	0	0				FXR2	ENSG00000129245	0.1129	0.148393				POLR2J	ENSG00000005075	0.0297756	-1.74348				ZC3HAV1	ENSG00000105939	0.0901905	0.301429	0.365119				RNASE7	ENSG00000165799	2.51611	-2.36644	-4.6				TDRD12	ENSG00000173809	0	-1.39385	-0.773955	-1.53672
C2	LIN28B	ENSG00000187772	0	-4.79	0.1728			SMG1	ENSG00000157106	0.080625	0.436082				RPL9	ENSG00000163682	0.19716	-1.73677				PABPN1L	ENSG00000205022	0.0827353	0	0				RPL3L	ENSG00000140986	1.65644	-1.01675	-2.29475				DDX58	ENSG00000107201	0.264695	-1.3785	-1.63134	-1.0239
	RALYL	ENSG00000184672	0	-4.43618				TRUB1	ENSG00000165832	0.0766756	0.453887				MSI1	ENSG00000135097	0.767493	-1.72948				G3BP2	ENSG00000138757	0.0765723	0.546524	0.303535				ADAD2	ENSG00000140955	1.20383	0.654775	-0.914454				TRNAU1AP	ENSG00000180098	1.69798	-1.11052	-0.765257	-0.939612
	RNF113B	ENSG00000139797	0	-1.80889				MRPL3	ENSG00000114686	0.0179682	0.0896224				RPL12	ENSG00000197958	0.360282	-1.69657				TNRC6A	ENSG00000090905	0.0757908	0.0663555	0.119159				TIPARP	ENSG00000163659	1.16975	1.76222	-0.0936897				TRIT1	ENSG00000043514	0.268032	-1.03764	-0.778396	-0.46957
	ZNF385A	ENSG00000161642	0.0858308	-1.27709				TNPO1	ENSG00000083312	0.0101825	0.0109694				RPS8	ENSG00000142937	1.22871	-1.69001				DZIP3	ENSG00000198919	0.0702061	0.372521	0.153875				ARHGEF28	ENSG00000214944	1.08815	0.668778	-0.580976				OASL	ENSG00000135114	0.508989	-0.963018	-0.795598	-0.94721
	LARP6	ENSG00000166173	0.345588	-0.836042				EEF1A1	ENSG00000156508	0.00531547	0.265904				RPS11	ENSG00000142534	0.153606	-1.68652				CCRN4L	ENSG00000151014	0.0671398	0.415581	0.12144				DDX26B	ENSG00000165359	1.04149	0.586657	-0.554706				PABPC1L	ENSG00000101104	0	-0.9491	0	0
	EIF4A2	ENSG00000156976	0.111593	-0.749359				LUC7L2	ENSG00000269955	0	0.653504				RBPMS	ENSG00000157110	1.65714	-1.63829				RBM7	ENSG00000076053	0.0538317	0.53339	0.149338				NPM2	ENSG00000158806	0.986988	0.292402	-1.44017				RBM34	ENSG00000188739	0.303258	-0.917229	-0.639226	-1.37999
	YBX3	ENSG00000060138	0.27277	-0.632069				TDRD15	ENSG00000218819	0	0.708401				RPL13A	ENSG00000142541	0.527667	-1.63703				DYNC1H1	ENSG00000197102	0.0530821	0.161888	0.136149				TLR3	ENSG00000164342	0.984239	0.38108	-0.0786577				PUS10	ENSG00000162927	1.20012	-0.903001	-0.517659	0
	YBX1	ENSG00000065978	0.11873	-0.523958				LIN28B	ENSG00000187772	0	0				NOP10	ENSG00000182117	0.371052	-1.63471				APOBEC3G	ENSG00000239713	0.0511636	0.692335	0.336579				PPARGC1B	ENSG00000155846	0.96447	0.970405	-0.979938				IFIT2	ENSG00000119922	1.53166	-0.864713	-1.32337	-0.27205
	CNBP	ENSG00000169714	0.158407	-0.454037				RBFOX1	ENSG00000078328	0	0				RPS13	ENSG00000110700	0.149061	-1.63338				SIDT1	ENSG00000072858	0.0473648	1.38262	0.905784				YBX3	ENSG00000060138	0.922414	0.383696	-0.281399				IFIT5	ENSG00000152778	1.7731	-0.821895	-1.08059	-0.84846
	DDX25	ENSG00000109832	0.271736	-0.371017				ZCCHC5	ENSG00000179300	0	0				ZFP36L2	ENSG00000152518	1.73329	-1.63251				SMAD1	ENSG00000170365	0.0439045	0.652565	0.651352				ENDOU	ENSG00000111405	0.910252	-0.622226	-0.920622				DDX26B	ENSG00000165359	0.0686637	-0.806843	-0.476612	-0.691481
	MRPL34	ENSG00000130312	0.149449	-0.358264				PAPOLB	ENSG00000218823	0	0				RPS27	ENSG00000177954	0.278649	-1.61992				EIF5	ENSG00000100664	0.0381731	0.612913	0.348248				MBNL3	ENSG00000076770	0.885612	0.292031	-0.812656				APOBEC3G	ENSG00000239713	0.0907708	-0.805595	-0.553301	-0.922679
	RARS2	ENSG00000146282	0.0433485	-0.357347				APOBEC4	ENSG00000173627	0	0				RPS27L	ENSG00000185088	0.92246	-1.59513				TXNL4A	ENSG00000141759	0.0363652	0.0792751	-0.147729				TDRD6	ENSG00000180113	0.78342	1.2261	-0.0339524				YBX1	ENSG00000065978	0.108578	-0.759217	-0.126358	-0.083941
	ENDOU	ENSG00000111405	1.63255	-0.302628				RNF17	ENSG00000132972	0	0				RPL5	ENSG00000122406	0.845654	-1.58677				TAF9	ENSG00000085231	0.0335528	0.224014	-0.0797404				EIF4A1	ENSG00000161960	0.672448	0.0917417	-1.27525				KHDC1	ENSG00000135314	0.395135	-0.755224	-0.856123	-0.106674
	DZIP1	ENSG00000134874	0.363655	-0.288365				IFIT1B	ENSG00000204010	0	0				RPL17	ENSG00000265681	0.670871	-1.5559				DICER1	ENSG00000100697	0.026421	0.599433	0.291842				DDX43	ENSG00000080007	0.626637	-0.657366	-0.546659				WRAP53	ENSG00000141499	0.071557	-0.689098	-1.25427	-1.37421
	RSL24D1	ENSG00000137876	0.0299535	-0.254489				DDX53	ENSG00000184735	0	0				RPL27	ENSG00000131469	0.750362	-1.54514				STAU2	ENSG00000040341	0.0264148	0.144183	-0.0265384				ELAC1	ENSG00000141642	0.618193	-0.0777115	0.236019				PPIL3	ENSG00000240344	0.523527	-0.673278	-0.395447	-0.13725
	TNRC6B	ENSG00000100354	0.114931	-0.245029				BOLL	ENSG00000152430	0	0				MOV10	ENSG00000155363	0.361546	-1.54178				SMAD3	ENSG00000166949	0.0246929	0.321725	0.430211				RNF17	ENSG00000132972	0.613102	0.518921	-0.11113				CLK2	ENSG00000176444	1.04099	-0.671907	-0.252833	-0.606912
	RBM11	ENSG00000185272	0.219857	-0.238458				PIH1D3	ENSG00000080572	0	0				RPL32	ENSG00000144713	0.465268	-1.53226				RNASE6	ENSG00000169413	0.015247	1.08113	0.819284				TRDMT1	ENSG00000107614	0.557053	-5.43008e-05	0.859089				MEX3A	ENSG00000254726	0.167495	-0.648924	-0.436577	-0.642224
	NOP10	ENSG00000182117	0.0499022	-0.227404				NR0B1	ENSG00000169297	0	0				RPL7	ENSG00000147604	0.472818	-1.52897				MRPS22	ENSG00000175110	0.0150028	0.202616	-0.00841509				RNASE3	ENSG00000169397	0.538257	-0.465781	-0.157566				MOV10	ENSG00000155363	0.196433	-0.644362	-0.648561	-0.155884
	FASTKD5	ENSG00000215251	0.000531577	-0.220989				LIN28A	ENSG00000131914	0	0				RP9	ENSG00000164610	0.208857	-1.52269				HBS1L	ENSG00000112339	0.00463315	0.0150455	-0.276845				RBMXL1	ENSG00000213516	0.533669	0.441978	-0.0320806				AC004381.6	ENSG00000005189	0.256807	-0.64265	-0.897842	-0.217489
	CDC40	ENSG00000168438	0.213657	-0.197276				APOBEC1	ENSG00000111701	0	0				RPLP1	ENSG00000137818	0.415322	-1.51465				ZCCHC2	ENSG00000141664	0.00386833	0.601187	0.371514				DDX25	ENSG00000109832	0.530036	1.22697	-0.512589				RPP40	ENSG00000124787	0.0478722	-0.640089	-0.735803	-0.652583
	EIF5	ENSG00000100664	0.244827	-0.178408				EIF4E1B	ENSG00000175766	0	0				PABPC1	ENSG00000070756	0.499005	-1.51145				TDRD15	ENSG00000218819	0	0	0				CPEB3	ENSG00000107864	0.480796	0.220318	-0.151379				NOC3L	ENSG00000173145	0.311438	-0.614916	-1.01889	-0.829144
	IREB2	ENSG00000136381	0.0918595	-0.166454				NCBP2L	ENSG00000170935	0	0				TSFM	ENSG00000123297	1.27047	-1.49293				SARS2	ENSG00000269547	0	0	0				SMAD6	ENSG00000137834	0.474389	-0.193986	0.120838				MKRN3	ENSG00000179455	1.4068	-0.610372	-1.19949	-0.489652
	RCL1	ENSG00000120158	0.373632	-0.146641				SARS2	ENSG00000269547	0	0				DCAF13	ENSG00000164934	0.519054	-1.49191				EIF4E1B	ENSG00000175766	0	0	0				RAVER2	ENSG00000162437	0.449028	-0.00487424	-0.254344				RPL23A	ENSG00000198242	0.290659	-0.608811	-0.473264	-0.459528
	TSR2	ENSG00000158526	0.135754	-0.115691				C9orf129	ENSG00000204352	0	0				RPL27A	ENSG00000166441	0.358534	-1.4847				NCBP2L	ENSG00000170935	0	0	0				ADAT2	ENSG00000189007	0.400203	-0.428806	-1.08516				RNASET2	ENSG00000026297	0.0335231	-0.596834	-0.741869	-1.22704
	MEPCE	ENSG00000146834	0.128486	-0.0940141				PIWIL3	ENSG00000184571	0	0				RPL23A	ENSG00000198242	0.154015	-1.46989				PIH1D3	ENSG00000080572	0	0	0				IGF2BP2	ENSG00000073792	0.39334	-0.931739	-1.91164				PRIM1	ENSG00000198056	1.01797	-0.57636	-0.298182	-0.437837
	TARSL2	ENSG00000185418	0.0216704	-0.0785917				RNF113B	ENSG00000139797	0	0				CRYZ	ENSG00000116791	0.734599	-1.46047				NXF5	ENSG00000126952	0	0	0				SMAD3	ENSG00000166949	0.392018	1.04488	-0.483332				SNRPG	ENSG00000143977	2.17857	-0.551626	-2.61382	-0.120551
	PDCD4	ENSG00000150593	0.178944	-0.0613567				PABPN1L	ENSG00000205022	0	0				EEF1G	ENSG00000254772	0.396415	-1.45967			C2	APOBEC1	ENSG00000111701	3.04203	-2.18577	-0.248115	0.2357			LUC7L2	ENSG00000269955	0.389542	0	-0.772482				SNRPC	ENSG00000124562	0.352402	-0.533355	-0.430406	-1.21624
	NYNRIN	ENSG00000205978	0.00558562	-0.0536269			C2	PEG10	ENSG00000242265	0.518223	-4.57422	-0.0164			SNRPB	ENSG00000125835	0.282791	-1.435				NANOS3	ENSG00000187556	0.433205	-3.8622	-3.87347				DDX47	ENSG00000213782	0.359211	0.0709715	-0.8151				TRMT13	ENSG00000122435	0.0272521	-0.508763	-0.840315	-0.782393
	R3HCC1L	ENSG00000166024	0.00084467	-0.0395791				RPL10L	ENSG00000165496	0	-4.5614				RPS4Y1	ENSG00000129824	1.6983	-1.42954				AZGP1	ENSG00000160862	0.388537	-3.69704	-3.11364				A1CF	ENSG00000148584	0.350882	-1.29339	-4.71				ADAT2	ENSG00000189007	0.594007	-0.508042	-1.32687	-0.346584
	ZMAT5	ENSG00000100319	0.00415813	-0.0366976				MSI1	ENSG00000135097	0.432312	-3.46653				RPL10A	ENSG00000198755	0.431751	-1.42118				ADAT3	ENSG00000213638	0.473781	-1.33185	-0.297633				PAN2	ENSG00000135473	0.349315	0.0924752	-0.476415				OAS3	ENSG00000111331	0.135736	-0.506326	-0.395444	-0.760327
	EEF2	ENSG00000167658	0.0421677	-0.0326162				YBX2	ENSG00000006047	0.386233	-1.94603				XRN2	ENSG00000088930	0.676832	-1.41192				RPS2	ENSG00000140988	0.12033	-1.29478	-1.11406				MEX3C	ENSG00000176624	0.329877	0.139318	-0.198204				IPO4	ENSG00000196497	0.106857	-0.493556	-1.51141	-2.18295
	MIF4GD	ENSG00000125457	0.0381671	-0.0153625				EXOSC4	ENSG00000178896	0.0271494	-1.02514				MRPL36	ENSG00000171421	0.924753	-1.40411				CELF5	ENSG00000161082	0.0680611	-1.21323	-0.55516				TRMT13	ENSG00000122435	0.328198	0.315063	-0.446648				PNO1	ENSG00000115946	0.269476	-0.482045	-0.519628	-0.508716
	ZMAT3	ENSG00000172667	0.0959023	-0.011126				TDRD10	ENSG00000163239	1.30773	-0.904809				EIF3E	ENSG00000104408	0.213981	-1.39921				RPL28	ENSG00000108107	0.232485	-1.19243	-0.897518				L1TD1	ENSG00000240563	0.287665	-0.593917	0.533455				EXOSC8	ENSG00000120699	0.0273613	-0.460305	-0.377293	-1.08519
	DICER1	ENSG00000100697	0.260083	-0.00388744				HNRNPCL1	ENSG00000179172	0	-0.8639				RPL30	ENSG00000156482	0.230398	-1.39565				MTG1	ENSG00000254536	1.01344	-1.1562	-0.13772				EIF2B3	ENSG00000070785	0.270221	-0.221713	-0.143547				BYSL	ENSG00000112578	1.80815	-0.451702	-0.724724	-0.966119
	ADARB2	ENSG00000185736	1.29816	-0.00344469				PNLDC1	ENSG00000146453	0.687423	-0.850047				RPL41	ENSG00000229117	0.236753	-1.39412				RPS15	ENSG00000115268	0.505579	-1.0931	-1.01466				IREB2	ENSG00000136381	0.257715	0.155752	-0.178546				APOBEC3F	ENSG00000128394	0.46083	-0.434719	-0.80942	-0.386261
	RBFOX2	ENSG00000100320	0.259951	-0.00129582				MRPL24	ENSG00000143314	0.0631011	-0.800732				RUVBL1	ENSG00000175792	0.201	-1.3885				RPL13	ENSG00000167526	0.58863	-1.08323	-0.86813				U2AF1	ENSG00000160201	0.24313	0.383791	-1.38477				OAS1	ENSG00000089127	0.087674	-0.361877	-0.5311	-0.686668
C3	APOBEC2	ENSG00000124701	-0.778062	1.33659	-0.2586			PUSL1	ENSG00000169972	0.112775	-0.77322				RPL35A	ENSG00000182899	0.761328	-1.38582				MRPL55	ENSG00000162910	0.157522	-1.07258	-0.925139				RPS14	ENSG00000164587	0.237387	-0.040415	0.942584				RPL19	ENSG00000108298	0.948824	-0.357641	-0.000575511	-0.400875
	AZGP1	ENSG00000160862	-1.47919	1.17273				TDRD9	ENSG00000156414	0.837255	-0.770119				MRPL13	ENSG00000172172	0.99275	-1.38228				MRPS34	ENSG00000074071	0.0642118	-0.987604	-0.797153				PARP4	ENSG00000102699	0.228245	-0.20353	-0.752117				CNOT11	ENSG00000158435	0.110876	-0.347716	-0.47063	-0.920215
	RBPMS2	ENSG00000166831	-0.258665	1.06453				MRPL13	ENSG00000172172	0.15156	-0.722999				RPLP2	ENSG00000177600	0.193658	-1.36774				RPL8	ENSG00000161016	0.0288636	-0.965211	-1.03495				DICER1	ENSG00000100697	0.224665	0.190511	-0.523215				PPIH	ENSG00000171960	0.244486	-0.325438	-0.19014	-0.0176522
	MVP	ENSG00000013364	-0.202703	1.0053				RNASE10	ENSG00000182545	0.963679	-0.701346				SNRPD2	ENSG00000125743	0.113385	-1.36519				ARL6IP4	ENSG00000182196	0.183726	-0.964998	-0.640514				XPO4	ENSG00000132953	0.221047	0.255337	-0.269776				SARNP	ENSG00000205323	0.188848	-0.322867	-0.48508	-0.281088
	RBM47	ENSG00000163694	-0.277815	0.95313				RPP40	ENSG00000124787	0.618752	-0.672432				POLR2G	ENSG00000168002	0.26778	-1.36131				PCBP4	ENSG00000090097	0.186734	-0.900098	-0.867523				RPL13	ENSG00000167526	0.21929	-0.0126566	0.78753				EIF3I	ENSG00000084623	0.0329633	-0.32072	-0.175347	-0.221974
	DDX60L	ENSG00000181381	-0.0573657	0.898006				MRPL55	ENSG00000162910	0.457411	-0.67187				RPS6	ENSG00000137154	0.435219	-1.35768				MRP63	ENSG00000173141	0.0826532	-0.898196	-0.870703				RANBP2	ENSG00000153201	0.215223	-0.0181438	0.232072				NOP58	ENSG00000055044	0.206891	-0.318574	-0.467961	-0.411361
	RNASE3	ENSG00000169397	-0.378508	0.842467				NXF5	ENSG00000126952	1.59138	-0.666661				RPS21	ENSG00000171858	0.34927	-1.35536				RPL18	ENSG00000063177	0.381933	-0.896976	-0.819138				RCL1	ENSG00000120158	0.200641	0.0547977	-0.400203				NONO	ENSG00000147140	0.210316	-0.317811	-0.626281	-0.383294
	IFIT1	ENSG00000185745	-0.001741	0.837685				DUS1L	ENSG00000169718	0.501407	-0.550183				POP5	ENSG00000167272	0.38426	-1.35486				NOL3	ENSG00000140939	0.344987	-0.887293	-0.887687				ZCCHC6	ENSG00000083223	0.197439	-0.187621	-1.01693				RNF113B	ENSG00000139797	0.256297	-0.313676	-0.346568	-0.458415
	FAM46A	ENSG00000112773	-0.465212	0.825907				TXNL4A	ENSG00000141759	0.0375239	-0.520227				NAA38	ENSG00000128534	0.30004	-1.35377				POLR2I	ENSG00000105258	0.137957	-0.887213	-0.858594				NANOS1	ENSG00000188613	0.188059	-0.954238	-0.337509				TSEN34	ENSG00000170892	0.4803	-0.298755	-0.261275	-0.885406
	ACO1	ENSG00000122729	-0.0777142	0.733372				DDX43	ENSG00000080007	0.198708	-0.510435				RPS27A	ENSG00000143947	0.217016	-1.34712				CLASRP	ENSG00000104859	0.0172647	-0.869857	-0.548307				RPLP2	ENSG00000177600	0.176163	-0.452247	0.444955				MRPL24	ENSG00000143314	0.299635	-0.2816	-0.776276	-0.746147
	TDRD9	ENSG00000156414	-0.214539	0.674508				HABP4	ENSG00000130956	0.102639	-0.488301				RPS28	ENSG00000233927	0.101521	-1.32594				RPL36	ENSG00000130255	0.407105	-0.842155	-0.846869				SAMHD1	ENSG00000101347	0.170161	-0.735842	-1.20696				NXT1	ENSG00000132661	0.251499	-0.258402	-0.521516	-0.718924
	NSUN7	ENSG00000179299	-0.321067	0.625411				TRMT2A	ENSG00000099899	0.0252653	-0.485109				MRPL11	ENSG00000174547	0.028744	-1.32249				GEMIN8	ENSG00000046647	0.0922425	-0.819313	-0.701512				SEPSECS	ENSG00000109618	0.169404	0.150314	-0.0759243				RPS7	ENSG00000171863	0.110835	-0.256853	-0.737863	-0.546098
	PATL2	ENSG00000229474	-0.190238	0.625223				KHDRBS3	ENSG00000131773	1.05436	-0.475763				RBM43	ENSG00000184898	1.01438	-1.31691				UNKL	ENSG00000059145	0.083144	-0.796327	-0.472688				RPS7	ENSG00000171863	0.16498	-0.107412	0.0609901				NOB1	ENSG00000141101	0.498007	-0.251918	-1.21013	-2.53205
	RNASE2	ENSG00000169385	-0.807712	0.516046				POLRMT	ENSG00000099821	0.330407	-0.468869				ZC3HC1	ENSG00000091732	0.19446	-1.3131				RPL12	ENSG00000197958	0.328653	-0.784316	-0.932658				EIF5	ENSG00000100664	0.16438	0.0956658	-0.0654486				MRPL55	ENSG00000162910	0.546109	-0.2459	-0.81804	-0.813046
	CRYZ	ENSG00000116791	-0.462773	0.501075				POP5	ENSG00000167272	0.246587	-0.465871				RPL18	ENSG00000063177	0.205908	-1.31238				RPS28	ENSG00000233927	0.463784	-0.771497	-0.488726				PET112	ENSG00000059691	0.155953	-0.380079	-0.328681				FARSB	ENSG00000116120	1.70607	-0.243622	-0.279133	-0.350987
	BICC1	ENSG00000122870	-0.223471	0.500765				RBPMS2	ENSG00000166831	0.965005	-0.452747				TSEN34	ENSG00000170892	0.469929	-1.30461				POLR1E	ENSG00000137054	0.0410504	-0.756683	-0.876575				FAM46A	ENSG00000112773	0.14177	1.0045	-0.221025				MRTO4	ENSG00000053372	0.872384	-0.238558	-0.0224787	-0.581744
	CXorf23	ENSG00000173681	-0.0377275	0.474279				NXT2	ENSG00000101888	0.0493429	-0.435439				RPL26L1	ENSG00000037241	0.309079	-1.30314				GAPDH	ENSG00000111640	0.0539553	-0.721521	-0.732349				FRG1B	ENSG00000149531	0.132805	0.985724	-0.0148636				ALYREF	ENSG00000183684	0.237596	-0.23811	-0.262312	-0.243389
	KHDRBS3	ENSG00000131773	-0.0575313	0.455891				ZCCHC9	ENSG00000131732	0.817248	-0.432945				RPL24	ENSG00000114391	0.288698	-1.30069				RBM11	ENSG00000185272	0.863641	-0.718956	-0.949401				TST	ENSG00000128311	0.125204	-0.650429	-0.449735				HEATR1	ENSG00000119285	0.0502116	-0.236122	-0.24364	-0.176726
	RANBP17	ENSG00000204764	-0.177592	0.437983				POLR2L	ENSG00000177700	0.4721	-0.429326				RPL36	ENSG00000130255	0.823918	-1.29446				RPS5	ENSG00000083845	0.376132	-0.716264	-0.979557				RPL35A	ENSG00000182899	0.12375	-0.0267551	0.166156				MRPL14	ENSG00000180992	0.312761	-0.215662	-0.0474924	-0.276691
	PCBP4	ENSG00000090097	-0.211464	0.425326				RPL32	ENSG00000144713	0.133622	-0.411828				DCPS	ENSG00000110063	0.34826	-1.2759				RPS4Y1	ENSG00000129824	1.21279	-0.713751	-0.21004				CDC40	ENSG00000168438	0.116039	0.26809	-0.279714				EIF5A	ENSG00000132507	0.834489	-0.211753	-0.092549	-1.41292
	SETD7	ENSG00000145391	-0.0475072	0.401665				SNRPF	ENSG00000139343	0.0593482	-0.404121				RBM38	ENSG00000132819	1.22222	-1.26993				TNPO2	ENSG00000105576	0.0661206	-0.711987	-0.638458				RPS9	ENSG00000170889	0.105561	-0.077078	0.754021				EIF6	ENSG00000242372	0.035793	-0.206675	-0.523392	-0.404291
	DDX58	ENSG00000107201	-0.1067	0.388724				TDRD6	ENSG00000180113	1.51395	-0.402261				RPL23	ENSG00000125691	0.630472	-1.26796				RPL35	ENSG00000136942	0.319126	-0.677382	-0.843768				RPL29	ENSG00000162244	0.0933741	-0.270058	0.625894				PTRH1	ENSG00000187024	0.133506	-0.199934	-0.507096	-0.616196
	ISG20	ENSG00000172183	-0.485872	0.337494				POLR2J	ENSG00000005075	0.317129	-0.40211				EEF1B2	ENSG00000114942	0.49263	-1.25403				MRPL23	ENSG00000214026	0.377658	-0.652725	-0.446886				RPL12	ENSG00000197958	0.085948	-0.315919	0.518278				DNMT3B	ENSG00000088305	1.09484	-0.189677	-0.107663	-1.81486
	HELZ2	ENSG00000130589	-0.482112	0.336637				MRTO4	ENSG00000053372	0.162675	-0.399772				SRBD1	ENSG00000068784	0.613064	-1.25216				CARHSP1	ENSG00000153048	0.105942	-0.651779	-0.372651				PRPF38A	ENSG00000134748	0.0755939	0.13147	-0.17277				RRP12	ENSG00000052749	1.2789	-0.187764	-0.521123	-1.15707
	SIDT1	ENSG00000072858	-0.869035	0.323523				SRA1	ENSG00000213523	0.313251	-0.399091				SF3B14	ENSG00000115128	0.395069	-1.2428				RPLP2	ENSG00000177600	0.273349	-0.644351	-0.586627				RPL39	ENSG00000198918	0.0618834	0.500659	-0.266361				PUS7	ENSG00000091127	1.01691	-0.18037	-0.218711	-0.997177
	DDX43	ENSG00000080007	-0.0683041	0.320398				PLD6	ENSG00000179598	0.130851	-0.395571				PTRF	ENSG00000177469	0.234662	-1.22741				RPS3	ENSG00000149273	0.236502	-0.635943	-0.817789				RPS11	ENSG00000142534	0.0611311	-0.140327	0.796073				SNRPE	ENSG00000182004	0.0915719	-0.177323	-0.624849	-0.254443
	IFIH1	ENSG00000115267	-0.197715	0.318927				PATL2	ENSG00000229474	0.0025015	-0.38768				SNRPC	ENSG00000124562	0.100766	-1.20004				RNASE13	ENSG00000206150	0	-0.635136	0				MTRF1	ENSG00000120662	0.0524968	-0.317283	-1.18558				APOBEC3H	ENSG00000100298	0.417467	-0.175916	-0.270401	-0.274413
	RBM3	ENSG00000102317	-0.0682335	0.291609				CALR	ENSG00000179218	0.577301	-0.387332				RPL8	ENSG00000161016	0.0975157	-1.19901				ENDOG	ENSG00000167136	0.524883	-0.634085	-0.174296				RNASEL	ENSG00000135828	0.0521427	0.987613	-0.166624				BRCA1	ENSG00000012048	0.293282	-0.160334	-0.19258	-0.00852879
	PIWIL4	ENSG00000134627	-0.0785105	0.256841				RPS4Y1	ENSG00000129824	0.0652788	-0.376843				TRIM56	ENSG00000169871	0.235845	-1.19723				POLR2J3	ENSG00000168255	0.0591888	-0.623453	-0.749435				PSTK	ENSG00000179988	0.0512369	-0.183942	-0.276846				HELZ2	ENSG00000130589	0.239425	-0.159581	-0.21355	-0.288741
	PARP12	ENSG00000059378	-0.045929	0.226774				EIF6	ENSG00000242372	0.117546	-0.366859				ZC3H12A	ENSG00000163874	2.04314	-1.19037				MEPCE	ENSG00000146834	0.0158873	-0.62049	-0.318492				RARS2	ENSG00000146282	0.0511857	-0.124405	0.179373				WDR43	ENSG00000163811	0.439963	-0.149068	-0.621931	-0.721025
	TAF9	ENSG00000085231	-0.0401234	0.214946				RPL3L	ENSG00000140986	2.10484	-0.361002				PPIL3	ENSG00000240344	0.154489	-1.18991				ARHGEF28	ENSG00000214944	0.6485	-0.618461	-0.707249				DYNC1H1	ENSG00000197102	0.0508263	-0.21894	-0.113127				PAN2	ENSG00000135473	0.153996	-0.149004	-0.355907	-0.265048
	SEPSECS	ENSG00000109618	-0.289048	0.214069				MRPL14	ENSG00000180992	0.675275	-0.354614				RPL19	ENSG00000108298	0.390983	-1.17999				PRDX1	ENSG00000117450	0.231005	-0.607969	-0.428924				ZCCHC9	ENSG00000131732	0.0494834	0.389447	-0.121868				SF3B4	ENSG00000143368	1.42811	-0.121203	-0.103214	-0.471986
	GEMIN8	ENSG00000046647	-0.0296474	0.200958				RPL26L1	ENSG00000037241	0.00632567	-0.352092				PARP4	ENSG00000102699	1.16059	-1.17038				TSEN34	ENSG00000170892	0.0333073	-0.607238	-0.432953				MRPL46	ENSG00000259494	0.0373147	0.0208849	-0.36789				XPO1	ENSG00000082898	0.826483	-0.105553	-0.0177245	-0.00779211
	MYEF2	ENSG00000104177	-0.342554	0.19564				RNASE13	ENSG00000206150	0.72684	-0.351964				RPS9	ENSG00000170889	0.642981	-1.16336				PRPF40B	ENSG00000110844	0.247102	-0.600726	-0.716338				YBX1	ENSG00000065978	0.0373091	-0.550383	-0.376816				PARP12	ENSG00000059378	2.03567	-0.104028	-0.168902	0
	U2AF1	ENSG00000160201	-0.189612	0.170342				NOL11	ENSG00000130935	0.000881032	-0.330473				NONO	ENSG00000147140	0.224612	-1.15379				EEF2	ENSG00000167658	0.637996	-0.598136	-0.423959				R3HCC1L	ENSG00000166024	0.0345765	-0.0717023	-0.37402				GEMIN8	ENSG00000046647	0.411654	-0.103697	-0.259458	-2.91241
	NANOS3	ENSG00000187556	-0.310811	0.159614				MRPL23	ENSG00000214026	0.315982	-0.328981				RPS12	ENSG00000112306	0.289112	-1.14933				RPL18A	ENSG00000105640	0.679405	-0.591384	-0.653818				MOV10L1	ENSG00000073146	0.024275	1.48359	-0.78472				POLR2H	ENSG00000163882	0.0418078	-0.0943688	-0.280925	-0.583328
	PEG10	ENSG00000242265	-0.357288	0.154431				URB1	ENSG00000142207	0.003972	-0.322916				RPS20	ENSG00000008988	0.211228	-1.1459				RPLP0	ENSG00000089157	0.169487	-0.587728	-0.689233				NUFIP1	ENSG00000083635	0.0206679	-0.0182683	-0.205016				ZNF579	ENSG00000218891	2.5196	-0.0883499	-0.60089	-0.493542
	RPS23	ENSG00000186468	-0.133071	0.150714				MOV10	ENSG00000155363	0.291145	-0.314226				RPL13	ENSG00000167526	0.0720762	-1.14353				RPL29	ENSG00000162244	0.530202	-0.572554	-0.627271				MATR3	ENSG00000015479	0.019051	0.477392	-0.42374				POLR2G	ENSG00000168002	0.0225791	-0.0870511	-0.48942	-0.825893
	INTS12	ENSG00000138785	-0.0310007	0.143784				CALR3	ENSG00000269058	0	-0.298815				ILF2	ENSG00000143621	0.454278	-1.13742				RPL7	ENSG00000147604	0.0958791	-0.554645	-0.736833				RIOK3	ENSG00000101782	0.018297	-0.0344478	-0.751901				TERT	ENSG00000164362	0.108953	-0.0684433	-0.347826	-0.534934
	ZFP36L1	ENSG00000185650	-0.275174	0.121924				EIF4G3	ENSG00000075151	0.00394155	-0.297084				SRA1	ENSG00000213523	1.15191	-1.13658				RPS4X	ENSG00000198034	0.267423	-0.554641	-0.788577				NOC3L	ENSG00000173145	0.0142025	0.120653	-0.456023				RBM46	ENSG00000151962	0.118657	-0.0650127	-0.0960488	-0.405055
	KIAA0391	ENSG00000100890	-0.152299	0.121485				SND1	ENSG00000197157	0.0172152	-0.293236				TEFM	ENSG00000172171	0.474309	-1.11664				RPL10	ENSG00000147403	0.555588	-0.5121	-0.447545				ZC3H12A	ENSG00000163874	0.0128607	-0.779924	-1.46713				SARS2	ENSG00000269547	0.331663	-0.059822	-0.297686	-0.797777
	PPRC1	ENSG00000148840	-0.0457175	0.110939				SLIRP	ENSG00000119705	0.744289	-0.287585				FBL	ENSG00000105202	0.568705	-1.1081				FASTK	ENSG00000164896	0.223609	-0.497688	-0.188939				ELAC2	ENSG00000006744	0.00931819	-0.59754	-0.510167				PIWIL3	ENSG00000184571	0.335627	-0.055672	-0.491186	-0.799627
	ERI1	ENSG00000104626	-0.268477	0.108599				TSEN34	ENSG00000170892	0.0525454	-0.283148				ZCCHC9	ENSG00000131732	0.0494094	-1.10703				POLR2J	ENSG00000005075	0.0763292	-0.497396	-0.289322				ZCCHC2	ENSG00000141664	0.00713969	0.0802065	-0.0887347				RPL10L	ENSG00000165496	0.217947	-0.0478179	-0.118734	-0.520587
	CARHSP1	ENSG00000153048	-0.0854991	0.107442				MRPL15	ENSG00000137547	0.00375369	-0.28117				INTS12	ENSG00000138785	0.0203958	-1.10678				RPL38	ENSG00000172809	0.202923	-0.495946	-0.607397				WARS2	ENSG00000116874	0.0051614	-0.302259	0.0694178				MTG1	ENSG00000254536	0.227283	-0.0342655	-0.0276146	-0.411742
	RPS14	ENSG00000164587	-0.160878	0.105635				MRPL51	ENSG00000111639	0.00710776	-0.276674				TRPT1	ENSG00000149743	0.472822	-1.09337				RPS16	ENSG00000105193	0.331473	-0.469361	-0.802086				NR0B1	ENSG00000169297	0	0	-1.53768				C9orf129	ENSG00000204352	0.654744	-0.0261182	-0.117512	-0.0404121
	G3BP2	ENSG00000138757	-0.0611291	0.0868343				ZC3HC1	ENSG00000091732	0.483302	-0.274935				MEX3C	ENSG00000176624	0.0863479	-1.09331				POLR2L	ENSG00000177700	0.413172	-0.467935	-0.549524				RBMXL2	ENSG00000170748	0	0	-1.05745			C4	BICC1	ENSG00000122870	-4.66	-0.998867	-0.532288	-2.80554	0.1334
	EIF4B	ENSG00000063046	-0.00668875	0.0843712				GNL3	ENSG00000163938	0.0246308	-0.267692				PPIH	ENSG00000171960	0.34543	-1.08944				RPL30	ENSG00000156482	0.0431342	-0.46406	-0.568996				LIN28B	ENSG00000187772	0	-4.72	0				RNASE4	ENSG00000258818	-4.39502	-3.36013	-3.93304	-4.35235
	TST	ENSG00000128311	-0.290755	0.0795394				RPL29	ENSG00000162244	0.273471	-0.267475				PATL1	ENSG00000166889	0.747112	-1.06902				EIF5A2	ENSG00000163577	0.0246535	-0.452232	-1.35357				RNF113B	ENSG00000139797	0	-1.10104	0				DZIP1L	ENSG00000158163	-4.31672	-1.80335	-2.50212	-2.82594
	C11orf68	ENSG00000175573	-0.0449782	0.0674722				MEPCE	ENSG00000146834	0.193339	-0.261849				PHF5A	ENSG00000100410	0.355237	-1.06387				RPL19	ENSG00000108298	0.168949	-0.435156	-0.512575			C3	EIF4E1B	ENSG00000175766	-4.29479	0	0	0.2129			ANG	ENSG00000214274	-2.62743	-2.7296	-1.89174	-0.278613
	ZC3H12D	ENSG00000178199	-0.811298	0.0655864				TAF9	ENSG00000085231	0.323529	-0.257585				EIF4A3	ENSG00000141543	1.39831	-1.06138				RPLP1	ENSG00000137818	0.608112	-0.428457	-0.441821				CELF3	ENSG00000159409	-4.18473	-1.07561	0.793431				IGF2BP1	ENSG00000159217	-2.32014	-1.51364	-4.73788	-2.33316
	RPS27	ENSG00000177954	-0.283604	0.0622193				ZNF598	ENSG00000167962	0.133483	-0.254294				EIF3I	ENSG00000084623	1.37454	-1.05856				ADAD2	ENSG00000140955	1.8291	-0.405809	0.251964				ELAVL2	ENSG00000107105	-2.63477	0.137233	-3.4842				SRSF12	ENSG00000154548	-2.15409	0	-4.86304	0
	ASH1L	ENSG00000116539	-0.246494	0.0614688				PSTK	ENSG00000179988	1.45357	-0.251562				TIPARP	ENSG00000163659	1.81003	-1.05839				MRPL24	ENSG00000143314	0.000492856	-0.403918	-0.377825				PIH1D3	ENSG00000080572	-2.32971	0.730787	-3.94663				RBM24	ENSG00000112183	-2.05635	-0.241165	-0.451094	-0.330516
	RPL9	ENSG00000163682	-0.188124	0.0549498				MBNL3	ENSG00000076770	2.23823	-0.251158				RPS25	ENSG00000118181	0.435575	-1.05802				RPL32	ENSG00000144713	0.633816	-0.389932	-0.492708				DAZL	ENSG00000092345	-1.93596	0	-1.58873				SMAD9	ENSG00000120693	-1.7883	-0.64941	-2.09094	-0.894824
	CNOT6	ENSG00000113300	-0.159968	0.0494413				RPS29	ENSG00000213741	0.0187066	-0.234537				IPO4	ENSG00000196497	0.742598	-1.05187				OAS1	ENSG00000089127	0.0185544	-0.363954	0.425715				ZNF239	ENSG00000196793	-1.24708	-0.124006	0.868879				ZFP36	ENSG00000128016	-1.76023	-0.522907	-0.600992	-0.261982
	RRBP1	ENSG00000125844	-0.675851	0.0409234				DUS3L	ENSG00000141994	0.113941	-0.227494				HNRNPA1	ENSG00000135486	0.0989583	-1.04754				YBX3	ENSG00000060138	0.498125	-0.350856	-0.418113				SRRM4	ENSG00000139767	-1.12099	1.4851	1.81993				AFF3	ENSG00000144218	-1.75915	-1.55896	-0.797755	-0.944267
	RPS9	ENSG00000170889	-0.0868858	0.0340367				NOP10	ENSG00000182117	0.0965397	-0.222519				AIMP2	ENSG00000106305	0.900827	-1.04703				REXO2	ENSG00000076043	0.455516	-0.345001	-0.751641				MSI1	ENSG00000135097	-1.08713	-1.88264	0.207314				RBMS3	ENSG00000144642	-1.41981	-0.13714	-0.191554	-0.439166
	MRPS25	ENSG00000131368	-0.820379	0.0294125				ANGEL1	ENSG00000013523	0.626979	-0.222464				HNRNPAB	ENSG00000197451	1.46677	-1.04489				MRPS25	ENSG00000131368	0.0185185	-0.343823	-0.130401				IFIT2	ENSG00000119922	-1.07222	0.0556075	-1.36583				L1TD1	ENSG00000240563	-1.40092	-1.40928	-1.33853	-0.194146
	LSMD1	ENSG00000183011	-0.179755	0.0280152				PRDX1	ENSG00000117450	0.841405	-0.219415				RPL28	ENSG00000108107	0.240333	-1.04102				PUS3	ENSG00000110060	0.011623	-0.334724	-0.42607				LSM1	ENSG00000175324	-1.03077	-0.347431	0.05709				PIWIL4	ENSG00000134627	-1.31528	-0.247001	-0.173742	-0.765813
	RPL10	ENSG00000147403	-0.315961	0.0115895				TEFM	ENSG00000172171	0.00572315	-0.216462				SAMHD1	ENSG00000101347	1.0819	-1.04085				MRPS31	ENSG00000102738	0.103245	-0.330484	-0.395133				RBM24	ENSG00000112183	-0.959944	2.90005	4.69				RBM43	ENSG00000184898	-1.288	-0.946651	-1.22055	-1.83491
	RPS25	ENSG00000118181	-0.208732	0.00669989				MRPS15	ENSG00000116898	0.717418	-0.214506				NIFK	ENSG00000155438	0.373719	-1.04079				RPS9	ENSG00000170889	0.613627	-0.315563	-0.468091				RNASET2	ENSG00000026297	-0.900563	-0.912261	0.292662				TLR3	ENSG00000164342	-1.24769	-0.406052	-0.754607	-0.740213
	SRA1	ENSG00000213523	-0.286736	0.00472524				RPS26	ENSG00000197728	0.116099	-0.213818				POLR2L	ENSG00000177700	0.498421	-1.03674				TRPT1	ENSG00000149743	0.401115	-0.31411	-0.0727453				RBM11	ENSG00000185272	-0.875182	1.49114	1.18116				HENMT1	ENSG00000162639	-1.23775	-0.0670926	-0.571063	-0.81457
	APOBEC3H	ENSG00000100298	-0.440938	0.000907523				SNRNP25	ENSG00000161981	0.50113	-0.203123				EIF5A	ENSG00000132507	0.783167	-1.03656				RPL23	ENSG00000125691	0.248245	-0.310518	-0.542322				NXF5	ENSG00000126952	-0.86701	0	0				MRPL33	ENSG00000243147	-1.22573	-0.586452	-0.585901	-0.287541
C4	IGF2BP3	ENSG00000136231	-3.95802	-4.98451	0.749			TARS2	ENSG00000143374	0.495335	-0.190922				RBM7	ENSG00000076053	0.740315	-1.03513				NSUN7	ENSG00000179299	0.100807	-0.309292	-0.243613				PABPN1L	ENSG00000205022	-0.864185	0	0				APOBEC2	ENSG00000124701	-1.20167	-0.702274	-0.468477	-0.149799
	NR0B1	ENSG00000169297	-4.72	-4.89				MRPL36	ENSG00000171421	0.275721	-0.18985				FAU	ENSG00000149806	0.526261	-1.03094				RBM3	ENSG00000102317	0.10217	-0.308902	-0.539793				NCBP2L	ENSG00000170935	-0.859791	0	0				PABPC5	ENSG00000174740	-1.19435	-0.606236	-0.666431	-0.607753
	IGF2BP1	ENSG00000159217	-4.75	-4.8				POP7	ENSG00000172336	0.0640262	-0.171769				MRPS6	ENSG00000243927	1.04326	-1.02962				ESRP2	ENSG00000103067	0.224328	-0.292351	0.00664255				AFF3	ENSG00000144218	-0.837241	1.53071	3.48974				RNASE1	ENSG00000129538	-1.18494	-0.0615834	-0.0595162	-0.0590499
	DQX1	ENSG00000144045	-3.04632	-4.66				MRPL11	ENSG00000174547	0.071286	-0.170964				LSM12	ENSG00000161654	0.597445	-1.01834				RPS20	ENSG00000008988	0.420231	-0.286044	-0.473799				HNRNPCL1	ENSG00000179172	-0.833628	-0.5447	1.08391				PTRF	ENSG00000177469	-1.18326	-0.275996	-0.895428	-0.650302
	TERT	ENSG00000164362	-4.63	-4.65				EXOSC7	ENSG00000075914	0.492165	-0.170807				INTS9	ENSG00000104299	1.41529	-1.01307				SRPR	ENSG00000182934	0.0456838	-0.266724	-0.176137				KHDC1	ENSG00000135314	-0.815741	0.311823	-0.814709				TIPARP	ENSG00000163659	-1.15731	-0.596808	-0.662381	-1.23107
	RNASE7	ENSG00000165799	-1.63788	-4.64				EXOSC3	ENSG00000107371	0.0219031	-0.169143				BZW1	ENSG00000082153	1.48704	-1.01239				RPL35A	ENSG00000182899	0.42434	-0.264865	-0.623334				TRMT112	ENSG00000173113	-0.791019	-0.246507	0.108327				IFIT3	ENSG00000119917	-1.15328	-0.0707904	-0.0749121	-0.148917
	RNASE10	ENSG00000182545	-2.5046	-4.62				AIMP2	ENSG00000106305	0.37003	-0.16904				REXO2	ENSG00000076043	1.37482	-0.987979				RPSA	ENSG00000168028	0.182202	-0.262846	-0.46991				DDX60	ENSG00000137628	-0.782667	0.148871	-1.22391				RBMS2	ENSG00000076067	-1.13221	-0.853071	-1.65723	-0.333074
	EEF1A2	ENSG00000101210	-4.74	-4.61				PABPC5	ENSG00000174740	0.076311	-0.166627				DARS2	ENSG00000117593	1.09737	-0.983988				EIF2B3	ENSG00000070785	0.00612676	-0.261883	-0.588045				MYEF2	ENSG00000104177	-0.758904	-0.538819	0.875468				ZFP36L1	ENSG00000185650	-1.1295	-0.165356	-0.16319	-0.548196
	MKRN3	ENSG00000179455	-2.49705	-4.6				CTIF	ENSG00000134030	0.264585	-0.164326				EXOSC8	ENSG00000120699	0.0857778	-0.976645				RPS11	ENSG00000142534	0.509143	-0.261698	-0.512712				CSDC2	ENSG00000172346	-0.754011	3.92443	4.71				BARD1	ENSG00000138376	-1.12067	-1.77959	-1.57708	-0.592897
	YBX2	ENSG00000006047	-4.77911	-4.53193				CTU2	ENSG00000174177	0.166158	-0.156825				MRPS12	ENSG00000128626	0.880612	-0.974115				RPL23A	ENSG00000198242	0.636142	-0.250441	-0.444977				NANOS3	ENSG00000187556	-0.740137	-1.57262	0.224324				EEF1A1	ENSG00000156508	-1.09766	-1.41066	-1.09284	-0.593926
	TDRD5	ENSG00000162782	-3.70075	-4.51065				MTIF2	ENSG00000085760	0.279544	-0.151878				PNO1	ENSG00000115946	0.592965	-0.959626				MRPS15	ENSG00000116898	0.120427	-0.248963	-0.446244				RPL10L	ENSG00000165496	-0.680889	-0.918615	0.180053				PTBP2	ENSG00000117569	-1.09002	-0.358787	-0.775467	-0.751121
	TDRD12	ENSG00000173809	-1.86639	-4.45092				NUDT16L1	ENSG00000168101	0.850307	-0.145646				RPL6	ENSG00000089009	0.197159	-0.959214				MRPS24	ENSG00000062582	0.350925	-0.241054	-0.245445				CD2BP2	ENSG00000169217	-0.670511	-0.128945	0.387527				BZW1	ENSG00000082153	-1.07537	-1.77928	-1.94766	-1.71612
	EXO1	ENSG00000174371	-3.61516	-4.30361				MRPL12	ENSG00000262814	0.724402	-0.14412				MBNL3	ENSG00000076770	0.662653	-0.956083				GLTSCR2	ENSG00000105373	0.830451	-0.235975	-0.0443496				NXT1	ENSG00000132661	-0.595591	-0.296714	0.130837				PAIP2B	ENSG00000124374	-1.07417	-0.361804	-0.65792	-0.250597
	MEX3A	ENSG00000254726	-4.22524	-3.9348				TUT1	ENSG00000149016	0.684741	-0.14322				NMD3	ENSG00000169251	0.268322	-0.953549				RPS6	ENSG00000137154	0.648432	-0.233825	-0.62728				DCPS	ENSG00000110063	-0.585023	-0.806379	0.0680815				MIF4GD	ENSG00000125457	-1.05358	-0.619911	-0.199835	-0.130669
	PNLDC1	ENSG00000146453	-0.169457	-3.91493				TFB2M	ENSG00000162851	0.782748	-0.141626				RPL3L	ENSG00000140986	2.15537	-0.94626				RPS14	ENSG00000164587	0.597112	-0.228783	-0.644425				RPL8	ENSG00000161016	-0.561724	-0.360504	0.341305				ZC3H12D	ENSG00000178199	-1.05288	-0.0783301	-0.312613	-0.139594
	MSI1	ENSG00000135097	-2.36803	-3.89926				PPARGC1B	ENSG00000155846	0.455463	-0.128589				BZW2	ENSG00000136261	0.521567	-0.9425				GEMIN7	ENSG00000142252	0.12629	-0.208451	-0.333164				C9orf129	ENSG00000204352	-0.558452	0	0				ADARB1	ENSG00000197381	-1.04642	-1.0885	-1.02053	-0.692328
	PIWIL1	ENSG00000125207	-4.61	-3.7676				AARS	ENSG00000090861	0.256909	-0.124469				NOL11	ENSG00000130935	0.465664	-0.942173				MRPL41	ENSG00000182154	0.323451	-0.204901	-0.121				TRMT61A	ENSG00000166166	-0.550301	0.0193512	0.520598				RIOK1	ENSG00000124784	-1.04622	-0.867984	-0.606937	-0.480662
	MAEL	ENSG00000143194	-2.85455	-3.71536				EIF3I	ENSG00000084623	0.172254	-0.124301				PATL2	ENSG00000229474	0.496154	-0.938437				NUDT16L1	ENSG00000168101	0.454065	-0.204282	0.0835333				ZMAT5	ENSG00000100319	-0.529407	-0.0943116	0.199413				QKI	ENSG00000112531	-1.03909	-0.0404827	-0.241264	-0.428285
	RPL39L	ENSG00000163923	-2.34895	-3.58592				LSM5	ENSG00000106355	0.225981	-0.123472				RARS2	ENSG00000146282	1.33129	-0.925807				RPL3	ENSG00000100316	0.648674	-0.203932	-0.327378				RBM20	ENSG00000203867	-0.520727	1.75315	1.71781				ZC3H12A	ENSG00000163874	-1.03733	-0.301806	-0.920757	-0.744178
	RPL3L	ENSG00000140986	-1.91547	-3.4432				MRPS26	ENSG00000125901	0.400412	-0.118677				MRPL23	ENSG00000214026	0.65984	-0.916677				MRPL11	ENSG00000174547	0.0721143	-0.20222	-0.377168				MRPL49	ENSG00000149792	-0.51681	0.0185425	-0.052024				EIF4E3	ENSG00000163412	-1.03311	-0.561951	-1.17888	-0.780103
	EZH2	ENSG00000106462	-2.56191	-3.13809				YARS	ENSG00000134684	0.257122	-0.112815				DKC1	ENSG00000130826	0.19209	-0.916317				TSR2	ENSG00000158526	0.190293	-0.19173	-0.174445				MIF4GD	ENSG00000125457	-0.503108	0.0303845	0.401617				LSM11	ENSG00000155858	-1.03293	-0.314041	-0.415353	-0.0115576
	ELAVL2	ENSG00000107105	-3.42086	-3.05261				TRPT1	ENSG00000149743	0.370885	-0.106332				RPL34	ENSG00000109475	0.198998	-0.907018				SF3B14	ENSG00000115128	0.022648	-0.190781	-0.36434				SRPK2	ENSG00000135250	-0.495021	-0.269309	0.103263				RPS27A	ENSG00000143947	-1.03067	-0.335032	-0.216193	-0.864166
	BOLL	ENSG00000152430	-2.39364	-2.97338				DCP1B	ENSG00000151065	0.0965218	-0.103009				RPS23	ENSG00000186468	0.126701	-0.886216				RPS7	ENSG00000171863	0.26962	-0.188569	-0.628561				LUC7L	ENSG00000007392	-0.494562	-0.269312	0.0366182				EIF4A1	ENSG00000161960	-1.02932	-0.61654	-0.635227	-0.036741
	ADAD2	ENSG00000140955	-0.145203	-2.78224				FAU	ENSG00000149806	0.182138	-0.102128				ZFP36L1	ENSG00000185650	1.68935	-0.881734				CELF3	ENSG00000159409	0.254613	-0.187145	-0.0655495				PRPF6	ENSG00000101161	-0.483596	-0.168093	0.0631035				RPS27	ENSG00000177954	-1.02727	-0.940398	-0.697946	-0.280233
	PTGES3L-AARSD1	ENSG00000108825	-0.651792	-2.69301				POLR2I	ENSG00000105258	0.0793768	-0.0980946				SF3B4	ENSG00000143368	0.182534	-0.86357				MIF4GD	ENSG00000125457	0.234086	-0.185226	-0.236612				DUS4L	ENSG00000105865	-0.476424	0.000320495	-0.44721				UTP11L	ENSG00000183520	-1.01431	-0.567345	-0.978411	-1.0959
	DNMT3B	ENSG00000088305	-2.07256	-2.68061				MRPS24	ENSG00000062582	0.350244	-0.0956306				MRPL39	ENSG00000154719	1.21589	-0.862421				EIF1AY	ENSG00000198692	1.30202	-0.184232	0.0850927				NARS2	ENSG00000137513	-0.468623	-0.216707	0.0212136				RPL21	ENSG00000122026	-1.00635	-2.38466	-2.78075	-1.31399
	IGF2BP2	ENSG00000073792	-0.843248	-2.59545				UHMK1	ENSG00000152332	0.195445	-0.0927755				PRPF38A	ENSG00000134748	0.647061	-0.853236				CD2BP2	ENSG00000169217	0.126058	-0.183833	-0.0227166				RPL19	ENSG00000108298	-0.466461	-0.186778	0.58411				ATXN1	ENSG00000124788	-1.00413	-0.490315	-0.575438	-0.506801
	SRSF12	ENSG00000154548	-2.06884	-2.56191				PRPF19	ENSG00000110107	0.112464	-0.0845625				EIF4A1	ENSG00000161960	0.987339	-0.852404				ELAC2	ENSG00000006744	0.00625612	-0.179839	-0.256164				TSR2	ENSG00000158526	-0.45704	-0.0288353	0.234012				RIOK3	ENSG00000101782	-0.992729	-0.450548	-0.48219	-1.17873
	GAPDH	ENSG00000111640	-1.76105	-2.49658				VARS2	ENSG00000137411	0.0860551	-0.0829202				LSM1	ENSG00000175324	0.40755	-0.850466				RPL21	ENSG00000122026	0.63878	-0.178437	-0.508211				ENOX1	ENSG00000120658	-0.396919	2.26272	2.9006				OAS2	ENSG00000111335	-0.984978	-0.00300455	-0.44859	-0.578916
	RPL10L	ENSG00000165496	-1.43047	-2.37252				MOV10L1	ENSG00000073146	1.43597	-0.0790637				KIAA0020	ENSG00000080608	0.994191	-0.848952				PAPD5	ENSG00000121274	0.266768	-0.169538	-0.23544				PTGES3L-AARSD1	ENSG00000108825	-0.383536	1.60842	1.29333				RBPMS	ENSG00000157110	-0.977441	-0.261819	-0.655211	-0.453516
	FBLL1	ENSG00000188573	-1.411	-2.34901				RPL15	ENSG00000174748	0.216947	-0.0742675				TRNAU1AP	ENSG00000180098	0.122993	-0.847572				DDX3Y	ENSG00000067048	1.05096	-0.154599	0.332491				SND1	ENSG00000197157	-0.382547	-0.275942	0.259732				RARS2	ENSG00000146282	-0.968593	-0.595011	-0.780068	-0.568008
	CELF3	ENSG00000159409	-4.0319	-2.32936				EIF2AK1	ENSG00000086232	0.38217	-0.0710665				REPIN1	ENSG00000214022	0.258781	-0.845021				NYNRIN	ENSG00000205978	0.562746	-0.147149	0.191936				TRUB1	ENSG00000165832	-0.38133	0.00330946	0.116361				WARS	ENSG00000140105	-0.963697	-0.560237	-0.0400733	-0.933246
	THOC3	ENSG00000051596	-1.0036	-2.32799				SAMHD1	ENSG00000101347	0.354863	-0.0676145				APOBEC3H	ENSG00000100298	0.29584	-0.844434				PCBP3	ENSG00000183570	0.298521	-0.139049	0.25487				LRRFIP2	ENSG00000093167	-0.361541	0.418137	0.251969				RPS12	ENSG00000112306	-0.940421	-2.02136	-1.44806	-0.56583
	NPM3	ENSG00000107833	-1.73175	-2.31917				MRPL30	ENSG00000185414	0.0149598	-0.0672793				SERBP1	ENSG00000142864	1.27183	-0.841679				RPL24	ENSG00000114391	0.298433	-0.124575	-0.419131				NPM1	ENSG00000181163	-0.353328	0.506748	0.519575				EEF1B2	ENSG00000114942	-0.93716	-0.516881	-0.736792	-0.812552
	CELF5	ENSG00000161082	-3.38382	-2.27121				MRPS25	ENSG00000131368	0.986535	-0.0669901				TTF2	ENSG00000116830	1.14895	-0.840608				WBP4	ENSG00000120688	0.0222573	-0.120699	-0.33728				RPS15	ENSG00000115268	-0.325145	-0.532262	0.0746873				DDX60	ENSG00000137628	-0.937063	-0.699091	-0.612937	-0.224237
	RNASEH2A	ENSG00000104889	-1.3343	-2.24082				NOM1	ENSG00000146909	0.260215	-0.0541786				POLR2H	ENSG00000163882	0.953394	-0.836533				TRIM21	ENSG00000132109	0.108265	-0.116222	0.214568				RPS21	ENSG00000171858	-0.319077	-0.277252	0.17107				SMG1	ENSG00000157106	-0.93679	-0.238381	-0.22634	-0.409269
	DDX4	ENSG00000152670	-2.69888	-2.19774				EARS2	ENSG00000103356	0.42896	-0.0440531				NOP2	ENSG00000111641	0.0697966	-0.830431				PHF5A	ENSG00000100410	0.0741806	-0.111812	-0.470209				RPLP1	ENSG00000137818	-0.315067	-0.278617	0.0641276				NOVA2	ENSG00000104967	-0.914531	-0.0225142	-0.567143	-0.784395
	RBM46	ENSG00000151962	-3.36313	-2.10303				LSMD1	ENSG00000183011	0.0577052	-0.0421463				WARS2	ENSG00000116874	1.40614	-0.829757				RPS12	ENSG00000112306	0.220086	-0.109814	-0.381453				EEF1G	ENSG00000254772	-0.301465	0.267937	0.677945				RBM44	ENSG00000177483	-0.911549	-0.262553	-0.208789	-0.516935
	BOP1	ENSG00000261236	-1.74963	-2.08856				TNRC6C	ENSG00000078687	0.273041	-0.0353864				PUS7	ENSG00000091127	0.16656	-0.826159				IGHMBP2	ENSG00000132740	0.153149	-0.107671	-0.0451399				RPL30	ENSG00000156482	-0.300707	0.2854	0.662462				SBDS	ENSG00000126524	-0.903158	-0.0966168	-0.637808	-0.750219
	RBFOX1	ENSG00000078328	-3.47112	-2.00943				TSR2	ENSG00000158526	0.485467	-0.0340564				C1QBP	ENSG00000108561	1.12282	-0.811453				RPL27A	ENSG00000166441	0.51431	-0.103108	-0.483717				RP9	ENSG00000164610	-0.300559	-0.37241	0.0352844				EIF2S3L	ENSG00000180574	-0.902468	-0.178439	-0.443333	-0.316052
	PIWIL2	ENSG00000197181	-0.984453	-2.00559				MRPL49	ENSG00000149792	0.416571	-0.0287813				DDX56	ENSG00000136271	0.255456	-0.811154				RPS13	ENSG00000110700	0.439703	-0.0994592	-0.492363				KHDRBS2	ENSG00000112232	-0.298041	0.536833	0				RPS8	ENSG00000142937	-0.901447	-0.146782	-0.422511	-0.353301
	POLR2H	ENSG00000163882	-1.20736	-1.99991				RNASEL	ENSG00000135828	0.0867735	-0.0207324				ELAC1	ENSG00000141642	0.0643768	-0.807781				UTP3	ENSG00000132467	0.103632	-0.0956473	-0.159254				ZNFX1	ENSG00000124201	-0.29636	0.122354	-0.167071				RPL10A	ENSG00000198755	-0.899432	-1.0428	-1.0425	-0.432246
	BRCA1	ENSG00000012048	-1.46683	-1.95987				GLE1	ENSG00000119392	0.0575858	-0.0191365				RRP9	ENSG00000114767	0.851828	-0.797808				C11orf68	ENSG00000175573	0.565486	-0.0954479	0.079946				EXOSC7	ENSG00000075914	-0.284663	-0.586981	0.0184503				RPL5	ENSG00000122406	-0.898479	-1.05035	-0.737651	-0.323066
	RPP40	ENSG00000124787	-1.56623	-1.94896				LSM12	ENSG00000161654	0.0629424	-0.0149835				RPP40	ENSG00000124787	1.71235	-0.795308				RPL6	ENSG00000089009	0.345679	-0.0952151	-0.302504				SPATS2L	ENSG00000196141	-0.282855	0.221204	-0.704516				FXR2	ENSG00000129245	-0.896007	-1.1912	-1.02917	-0.318567
	A1CF	ENSG00000148584	-4.01918	-1.92781				ZNF106	ENSG00000103994	0.000823495	-0.010675				POLR1E	ENSG00000137054	0.774154	-0.784719				RPL27	ENSG00000131469	0.668117	-0.0861113	-0.606558				IGHMBP2	ENSG00000132740	-0.282666	0.0839532	0.385464				PPRC1	ENSG00000148840	-0.895168	-0.718043	-0.748321	-1.215
	ZC3HAV1L	ENSG00000146858	-1.54603	-1.90888				LONP1	ENSG00000196365	0.834139	-0.0100388				DDX31	ENSG00000125485	0.119295	-0.782187				IPO13	ENSG00000117408	0.331686	-0.0810736	0.151094				RIOK1	ENSG00000124784	-0.279161	0.00322219	-0.330029				RPS10	ENSG00000124614	-0.883623	-0.377795	-0.581602	-0.570222
	MTG1	ENSG00000254536	-1.42853	-1.87829				MRPL4	ENSG00000105364	0.136642	-0.00210878				MRPL14	ENSG00000180992	0.352792	-0.773778				ZNF768	ENSG00000169957	0.115455	-0.081016	0.360537				PUS10	ENSG00000162927	-0.278743	0.0299654	-0.724482				RNASEL	ENSG00000135828	-0.883427	-0.870196	-0.885275	-1.13004
	RNF17	ENSG00000132972	-0.346482	-1.86975			C3	SRRM4	ENSG00000139767	-4.62	0	0.1555			MSI2	ENSG00000153944	1.16627	-0.772967				MRPL21	ENSG00000197345	0.0204369	-0.080246	-0.265515				DHX40	ENSG00000108406	-0.266791	-0.191541	0.136092				RPL27	ENSG00000131469	-0.869966	-0.258899	-0.924707	-0.273074
	MOV10L1	ENSG00000073146	-1.31303	-1.83363				DDX4	ENSG00000152670	-2.64854	0				RNASE13	ENSG00000206150	0	-0.768527				ZCCHC9	ENSG00000131732	0.116659	-0.0783973	-0.335694				RSRC1	ENSG00000174891	-0.266476	0.0673162	-1.03547				MATR3	ENSG00000015479	-0.868282	-0.339309	-0.308705	-0.686508
	EIF5A2	ENSG00000163577	-0.306564	-1.81977				RALYL	ENSG00000184672	-2.55246	0.0832729				WDR3	ENSG00000065183	1.34312	-0.756037				RPL13A	ENSG00000142541	0.597592	-0.0758734	-0.273045				MEPCE	ENSG00000146834	-0.247894	0.129372	0.12359				SAMHD1	ENSG00000101347	-0.866038	-0.54823	-0.660195	-1.02016
	DAZL	ENSG00000092345	-2.04295	-1.81521				ERN2	ENSG00000134398	-2.48137	0.334094				U2AF1	ENSG00000160201	0.127557	-0.754873				ZFP36L1	ENSG00000185650	0.808592	-0.0758382	-0.118316				RPL38	ENSG00000172809	-0.247273	-0.118356	0.291311				CCRN4L	ENSG00000151014	-0.845755	-0.511019	-0.366476	-0.659443
	CPSF4L	ENSG00000187959	-0.7259	-1.79386				ADARB2	ENSG00000185736	-2.29957	0.518252				SPATS2L	ENSG00000196141	0.218855	-0.749087				ZCCHC6	ENSG00000083223	0.184296	-0.0731424	0.0375373				RPL36	ENSG00000130255	-0.246756	-0.396026	0.214608				ZCCHC5	ENSG00000179300	-0.825761	-1.02415	-1.08888	-0.535323
	RPL22L1	ENSG00000163584	-1.20219	-1.79275				PTGES3L-AARSD1	ENSG00000108825	-2.12001	0				DUS3L	ENSG00000141994	0.329957	-0.74448				RPS26	ENSG00000197728	0.294549	-0.0668308	-0.225021				MEX3B	ENSG00000183496	-0.246678	1.25837	1.18773				DDX4	ENSG00000152670	-0.824414	-0.485225	-0.679975	-0.716927
	DKC1	ENSG00000130826	-1.16291	-1.77993				YBX3	ENSG00000060138	-1.99488	0.0171863				MRPL32	ENSG00000106591	0.882999	-0.73409				RPS8	ENSG00000142937	0.495663	-0.0555389	-0.422236				LRRFIP1	ENSG00000124831	-0.244255	0.504813	0.586262				RNF17	ENSG00000132972	-0.808088	-0.28107	-0.235361	-0.575258
	PUS7	ENSG00000091127	-1.28117	-1.77977				RBM11	ENSG00000185272	-1.52933	0.379651				BRIX1	ENSG00000113460	0.174213	-0.71995				RPS27A	ENSG00000143947	0.403634	-0.0528027	-0.440428				RPL35	ENSG00000136942	-0.243193	-0.276735	0.166343			C5	YBX2	ENSG00000006047	-0.802884	-0.184621	-1.11712	-0.759436	0.4149
	BRIX1	ENSG00000113460	-1.24628	-1.77321				APOBEC3G	ENSG00000239713	-1.15047	0.0422448				EIF6	ENSG00000242372	0.754487	-0.712428				YBX1	ENSG00000065978	0.102878	-0.0528019	-0.237401				TSEN2	ENSG00000154743	-0.241222	0.0298527	0.454528				PABPC4L	ENSG00000254535	-0.80001	-0.135121	-0.080197	-0.459029
	KHDC1	ENSG00000135314	-1.10796	-1.75786				OAS3	ENSG00000111331	-1.14826	0.530754				NR0B1	ENSG00000169297	4.4	-0.705879				HABP4	ENSG00000130956	0.643668	-0.0519287	-0.284844				GEMIN8	ENSG00000046647	-0.240279	0.240609	0.361184				MOV10L1	ENSG00000073146	-0.798098	-1.41116	-1.44211	-0.449115
	PABPC1L	ENSG00000101104	-2.17091	-1.75568				IFIT2	ENSG00000119922	-1.13543	0.808347				HEATR1	ENSG00000119285	0.381854	-0.699663				RPL10A	ENSG00000198755	0.66736	-0.0329938	-0.390105				XRN2	ENSG00000088930	-0.237408	0.135655	-0.0266919				NSUN7	ENSG00000179299	-0.797853	-0.601365	-0.717571	-1.07108
	CMSS1	ENSG00000184220	-0.695423	-1.73175				RBPMS	ENSG00000157110	-0.975036	0.287919				CARHSP1	ENSG00000153048	0.93929	-0.696122				MRPL51	ENSG00000111639	0.0763159	-0.0283208	-0.305504				INTS12	ENSG00000138785	-0.229992	0.0646497	0.0535474				RNASE7	ENSG00000165799	-0.788865	-1.62962	-1.87987	-2.10094
	EXOSC5	ENSG00000077348	-1.22771	-1.70938				DHX40	ENSG00000108406	-0.89796	0.0476479				MRPL51	ENSG00000111639	0.211148	-0.68808				UTP11L	ENSG00000183520	0.0116719	-0.0242475	-0.519184				RPL18A	ENSG00000105640	-0.226181	-0.346423	0.106172				RBPMS2	ENSG00000166831	-0.786588	-0.0819931	-0.114986	-0.602924
	HNRNPCL1	ENSG00000179172	-0.732045	-1.70441				TRDMT1	ENSG00000107614	-0.81427	0.15305				LSMD1	ENSG00000183011	0.319772	-0.684594				FRG1B	ENSG00000149531	0.226628	-0.0110955	0.726785				IFIT5	ENSG00000152778	-0.222759	0.363193	-0.0844565				AEN	ENSG00000181026	-0.783623	-1.08982	-0.764708	-0.203219
	MRPL47	ENSG00000136522	-0.584102	-1.70302				ZNFX1	ENSG00000124201	-0.801932	0.201794				QTRTD1	ENSG00000151576	0.846691	-0.680992				EEF1B2	ENSG00000114942	0.440537	-0.00861068	-0.484138				PAPD5	ENSG00000121274	-0.218965	0.339251	0.643297				DCPS	ENSG00000110063	-0.782889	-0.33402	-0.597397	-0.721386
	MRPS12	ENSG00000128626	-0.998689	-1.69806				CELF2	ENSG00000048740	-0.801696	0.408035				MRPL49	ENSG00000149792	1.4074	-0.679321				DCP1B	ENSG00000151065	0.4422	-0.00818047	-0.045363				APOBEC3F	ENSG00000128394	-0.218321	0.0681389	-0.0305509				SAMD4A	ENSG00000020577	-0.781713	-0.118695	-0.0415718	-0.660804
	MRPL12	ENSG00000262814	-1.27341	-1.6897				IFIT3	ENSG00000119917	-0.801451	0.746278				MRPL3	ENSG00000114686	0.806662	-0.668735				ZC3H12B	ENSG00000102053	0.193866	-0.00734421	-0.162325				ZC3HAV1L	ENSG00000146858	-0.216466	0.0618817	-0.675281				CPEB1	ENSG00000214575	-0.778678	-0.942852	-0.852977	-0.197386
	CD3EAP	ENSG00000117877	-1.2156	-1.67121				DHX32	ENSG00000089876	-0.71703	0.431832				MRPL15	ENSG00000137547	0.423916	-0.667667				SNRNP25	ENSG00000161981	0.256739	-0.002599	-0.326532				SRPR	ENSG00000182934	-0.214044	-0.348081	0.300769				PPARGC1A	ENSG00000109819	-0.769308	-0.0831923	-0.884908	-0.986067
	MRPL3	ENSG00000114686	-1.05079	-1.65231				APOBEC3F	ENSG00000128394	-0.714859	0.135732				CSTF2	ENSG00000101811	0.427968	-0.659043			C3	LIN28B	ENSG00000187772	-4.62	0	0	0.266			RPS16	ENSG00000105193	-0.203659	-0.19271	0.329379				ENOX2	ENSG00000165675	-0.761961	-0.706089	-0.85685	-0.23378
	FBL	ENSG00000105202	-0.598126	-1.62555				DDX58	ENSG00000107201	-0.684948	0.504846				NUDT16L1	ENSG00000168101	0.579673	-0.652293				DDX4	ENSG00000152670	-2.67633	0	0				HTATSF1	ENSG00000102241	-0.203277	0.43253	0.0987687				REPIN1	ENSG00000214022	-0.757244	-0.573507	-0.807557	-0.831035
	ESRP1	ENSG00000104413	-1.1372	-1.62046				L1TD1	ENSG00000240563	-0.667331	0.226094				MRPL47	ENSG00000136522	0.85978	-0.644575				DDX53	ENSG00000184735	-2.58269	0	0				TLR7	ENSG00000196664	-0.199753	0.112594	-1.15578				MSI2	ENSG00000153944	-0.756587	-0.481228	-1.03807	-1.01217
	MRPL36	ENSG00000171421	-1.09311	-1.61011				RNASE6	ENSG00000169413	-0.615142	0.150864				BYSL	ENSG00000112578	0.61648	-0.642705				PIWIL3	ENSG00000184571	-2.476	0	0				IFIT1B	ENSG00000204010	-0.198911	0	-0.680339				PURG	ENSG00000172733	-0.753602	-0.515121	-1.00957	-0.64397
	DDX39A	ENSG00000123136	-0.978927	-1.59451				PPRC1	ENSG00000148840	-0.608132	0.21443				NPM3	ENSG00000107833	0.58208	-0.640364				RNF17	ENSG00000132972	-2.40099	0	0				G3BP2	ENSG00000138757	-0.195819	0.103837	0.0271698				CELF2	ENSG00000048740	-0.699905	-0.824184	-0.684649	-0.617977
	ELAVL4	ENSG00000162374	-1.84027	-1.59422				MEX3C	ENSG00000176624	-0.580042	0.0417781				DDX49	ENSG00000105671	0.646626	-0.639863				RBM46	ENSG00000151962	-2.12459	0	0				RPSA	ENSG00000168028	-0.188249	-0.453196	0.265554				CPEB2	ENSG00000137449	-0.688224	-0.244191	-0.27138	-0.244832
	LSG1	ENSG00000041802	-0.515311	-1.58855				NOB1	ENSG00000141101	-0.51723	0.0348594				TBRG4	ENSG00000136270	0.471085	-0.638437				BOLL	ENSG00000152430	-1.75345	0	0				RPL18	ENSG00000063177	-0.186915	-0.314319	0.414154				MRPS25	ENSG00000131368	-0.684265	-0.460947	-0.470126	-0.0492687
	XPOT	ENSG00000184575	-0.954937	-1.58159				PDCD4	ENSG00000150593	-0.442916	0.0415579				NCBP2	ENSG00000114503	0.698969	-0.638169				TDRD12	ENSG00000173809	-1.75218	0.868403	0.397034				SARNP	ENSG00000205323	-0.18634	0.213041	0.649744				SECISBP2L	ENSG00000138593	-0.679939	-0.704844	-0.944787	-0.800371
	NOP2	ENSG00000111641	-1.1352	-1.57673				DDX47	ENSG00000213782	-0.434481	0.055686				EIF2AK1	ENSG00000086232	0.059473	-0.633929				RNASE3	ENSG00000169397	-1.74925	0.584753	0.57895				CPEB2	ENSG00000137449	-0.18583	1.04845	0.197865				RPP25	ENSG00000178718	-0.678105	-0.432432	-1.04376	-0.56506
	FXR1	ENSG00000114416	-0.347984	-1.57203				ELAVL4	ENSG00000162374	-0.431973	0.361848				PUSL1	ENSG00000169972	0.576915	-0.628838				LIN28A	ENSG00000131914	-1.63534	0	0				RPS26	ENSG00000197728	-0.170606	-0.637452	0.0507067				EEF2	ENSG00000167658	-0.673746	-0.146887	-0.0668887	-0.335819
	RSRC1	ENSG00000174891	-0.528122	-1.55121				XRN2	ENSG00000088930	-0.413558	0.00805867				TRMT112	ENSG00000173113	0.12179	-0.626687				TDRD6	ENSG00000180113	-1.63319	0.139192	-0.243049				APOBEC3G	ENSG00000239713	-0.16919	0.749775	-0.621219				LARS2	ENSG00000011376	-0.670055	-0.452148	-0.361195	-0.730431
	TARS	ENSG00000113407	-0.984239	-1.54182				TARSL2	ENSG00000185418	-0.404127	0.150021				TRMT13	ENSG00000122435	1.1115	-0.624185				RNF113B	ENSG00000139797	-1.46169	0	0				FAU	ENSG00000149806	-0.166136	-0.0408895	0.656556				EARS2	ENSG00000103356	-0.66566	-0.712202	-0.40693	-0.326324
	RUVBL1	ENSG00000175792	-0.822666	-1.53561				SMG6	ENSG00000070366	-0.399187	0.322975				GLE1	ENSG00000119392	1.05143	-0.619458				RBMXL2	ENSG00000170748	-1.14711	0	0				HNRNPA1	ENSG00000135486	-0.161264	0.117249	0.526556				NUDT16	ENSG00000198585	-0.658815	-1.56287	-0.774956	-0.66469
	FBXO17	ENSG00000104835	-0.963506	-1.52319				KIAA0430	ENSG00000166783	-0.388736	0.211293				TFB2M	ENSG00000162851	2.00521	-0.615077				RBFOX1	ENSG00000078328	-1.09107	0.949053	1.07534				DDX10	ENSG00000178105	-0.157004	0.179388	0.43049				SNRNP25	ENSG00000161981	-0.656944	-0.504167	-0.88491	-0.0808138
	MEX3B	ENSG00000183496	-1.13839	-1.4948				EIF3L	ENSG00000100129	-0.38107	0.137448				URB2	ENSG00000135763	0.48101	-0.612259				APOBEC4	ENSG00000173627	-1.07964	0.0963258	-0.345006				TRIM21	ENSG00000132109	-0.151467	0.110115	-0.20934				TFIP11	ENSG00000100109	-0.653652	-0.673979	-0.542212	-1.16277
	DCAF13	ENSG00000164934	-1.341	-1.48409				HELZ2	ENSG00000130589	-0.37527	0.111061				NOL10	ENSG00000115761	0.794613	-0.603475				YBX2	ENSG00000006047	-1.05533	-0.202842	0.418913				DCP1B	ENSG00000151065	-0.142451	0.743493	1.85111				ZCCHC14	ENSG00000140948	-0.653058	-0.808127	-0.670208	-0.841024
	BZW2	ENSG00000136261	-1.32822	-1.47033				SMAD6	ENSG00000137834	-0.344822	0.984652				ZMAT5	ENSG00000100319	1.0239	-0.592113				MAEL	ENSG00000143194	-0.959153	0.257398	-0.62245				PCBP4	ENSG00000090097	-0.133236	-0.769262	0.305457				MRPL41	ENSG00000182154	-0.649707	-1.25199	-0.906613	-0.818757
	RAE1	ENSG00000101146	-0.777425	-1.46202				SIDT1	ENSG00000072858	-0.333432	0.140935				EIF1AY	ENSG00000198692	0.752077	-0.59146				TDRD9	ENSG00000156414	-0.948259	0.242332	0.312108				RPS3	ENSG00000149273	-0.131054	0.00899431	0.689296				EXOSC7	ENSG00000075914	-0.644691	-0.301902	-0.439959	-0.703968
	CALR3	ENSG00000269058	-2.06239	-1.46108				SMAD7	ENSG00000101665	-0.328666	0.581751				NOC3L	ENSG00000173145	0.64856	-0.590913				DZIP1L	ENSG00000158163	-0.857865	0.134348	-0.122964				TAF9	ENSG00000085231	-0.130434	0.0963427	0.325284				PLD6	ENSG00000179598	-0.640004	-0.627559	-0.373015	-0.947533
	TBRG4	ENSG00000136270	-1.11055	-1.45552				OAS2	ENSG00000111335	-0.31036	1.15822				TARS	ENSG00000113407	0.568755	-0.590747				IFIT2	ENSG00000119922	-0.814206	0.669458	0.81342				DDX51	ENSG00000185163	-0.125828	-0.0761913	0.0214817				POLR2F	ENSG00000100142	-0.639527	-0.71213	-1.0578	-0.777299
	PRKDC	ENSG00000253729	-1.08789	-1.44812				EIF4B	ENSG00000063046	-0.301378	0.224283				MRPS15	ENSG00000116898	0.580902	-0.588137				PATL2	ENSG00000229474	-0.80339	0.266105	0.452303				PRPF40B	ENSG00000110844	-0.123321	0.250836	0.189723				EIF5A2	ENSG00000163577	-0.636339	-1.05638	-0.932905	-0.162888
	TTF2	ENSG00000116830	-0.8875	-1.44697				DDX60	ENSG00000137628	-0.292985	0.762275				NOP16	ENSG00000048162	0.843076	-0.58337				CALR3	ENSG00000269058	-0.773382	0	0				RNASE6	ENSG00000169413	-0.122772	-0.298128	0.322746				PCBP4	ENSG00000090097	-0.635441	-0.734034	-0.549574	-0.665598
	CSTF2	ENSG00000101811	-1.11584	-1.42533				DDX21	ENSG00000165732	-0.28659	0.500561				ARL6IP4	ENSG00000182196	0.283234	-0.582217				BICC1	ENSG00000122870	-0.762662	0.20569	-0.466594				ADARB2	ENSG00000185736	-0.121143	1.791	-2.57291				NXF5	ENSG00000126952	-0.632405	-0.573883	-0.657533	-0.514891
	CCDC86	ENSG00000110104	-0.905355	-1.42368				WDR3	ENSG00000065183	-0.283034	0.297911				RPL3	ENSG00000100316	0.52978	-0.579266				UHMK1	ENSG00000152332	-0.71296	0.40649	0.157392				EIF3M	ENSG00000149100	-0.120553	0.396675	0.36384				STRBP	ENSG00000165209	-0.628555	-0.058332	-0.201971	-0.524397
	MSI2	ENSG00000153944	-1.16383	-1.42314				TRIM21	ENSG00000132109	-0.281366	0.156456				MRPL33	ENSG00000243147	1.19987	-0.574121				ZFR2	ENSG00000105278	-0.678428	1.85359	1.08851				PDE12	ENSG00000174840	-0.118064	-0.082448	0.0473674				MECP2	ENSG00000169057	-0.618819	-0.466563	-0.493057	-0.75131
	PABPC3	ENSG00000151846	-1.1131	-1.42297				ZFP36L2	ENSG00000152518	-0.268692	0.46824				PRDX1	ENSG00000117450	0.801143	-0.572152				RRBP1	ENSG00000125844	-0.678287	-0.346762	0.0541992				RPL23A	ENSG00000198242	-0.116885	0.0515395	0.56809				UTP3	ENSG00000132467	-0.615545	-0.999066	-0.751679	-0.198761
	GTPBP3	ENSG00000130299	-0.871777	-1.42177				RSL24D1	ENSG00000137876	-0.25108	0.0815327				MRPL24	ENSG00000143314	0.800821	-0.570825				DAZL	ENSG00000092345	-0.655958	1.12902	-0.383383				EIF4G3	ENSG00000075151	-0.116177	0.0828484	-0.095703				ANGEL1	ENSG00000013523	-0.608436	-0.306613	-0.364299	-0.68518
	ZC3H8	ENSG00000144161	-0.803397	-1.40014				NOLC1	ENSG00000166197	-0.247077	0.126418				CLK2	ENSG00000176444	0.30539	-0.569521				CELF6	ENSG00000140488	-0.628639	0	0				RPL41	ENSG00000229117	-0.115905	0.0884236	0.47763				IGF2BP2	ENSG00000073792	-0.606692	-0.820499	-1.01743	-1.44714
	EXOSC4	ENSG00000178896	-1.09093	-1.39382				EIF4A1	ENSG00000161960	-0.245866	0.0245037				TFB1M	ENSG00000029639	1.19553	-0.564535				TLR8	ENSG00000101916	-0.622106	1.25545	0.994359				FXR1	ENSG00000114416	-0.113134	0.0224808	-0.26922				GRSF1	ENSG00000132463	-0.60382	-1.09806	-0.698042	-0.725507
	XPO5	ENSG00000124571	-1.04739	-1.39358				NSUN4	ENSG00000117481	-0.245784	0.0299905				MRPL12	ENSG00000262814	0.243402	-0.559733				PAPOLB	ENSG00000218823	-0.590076	0	0				C11orf68	ENSG00000175573	-0.111644	0.720969	1.41055				TSR2	ENSG00000158526	-0.600443	-0.145884	-0.588979	-0.132279
	SNRPA1	ENSG00000131876	-0.986785	-1.39256				RBMS1	ENSG00000153250	-0.23857	0.606322				NOM1	ENSG00000146909	0.585676	-0.552902				RPL39L	ENSG00000163923	-0.543452	0.446571	-0.243117				R3HDM2	ENSG00000179912	-0.109156	0.336638	0.116278				LARP4	ENSG00000161813	-0.599454	-1.03173	-1.5108	-0.655201
	DARS2	ENSG00000117593	-1.22933	-1.3876				TARS	ENSG00000113407	-0.19234	0.175164				NARS2	ENSG00000137513	1.02756	-0.542591				IFIH1	ENSG00000115267	-0.509277	0.0407504	0.0917467				ATXN1	ENSG00000124788	-0.106768	1.07352	1.2079				DDX28	ENSG00000182810	-0.598125	-0.287035	-0.147637	-0.257853
	SNRPB	ENSG00000125835	-0.818282	-1.37815				ZC3H12A	ENSG00000163874	-0.184493	0.597292				DDX47	ENSG00000213782	0.42904	-0.542138				GFM1	ENSG00000168827	-0.507594	0.0219257	-0.047007				FXR2	ENSG00000129245	-0.0981453	0.0320101	0.237711				CPEB4	ENSG00000113742	-0.597157	-0.841262	-0.675976	-0.128634
	NANOS1	ENSG00000188613	-1.4149	-1.35847				IFIH1	ENSG00000115267	-0.1506	0.512813				MRPS24	ENSG00000062582	1.07812	-0.528201				MEX3B	ENSG00000183496	-0.504706	0.464771	-0.17423				UPF2	ENSG00000151461	-0.0978642	0.175674	0.0517651				MRPL15	ENSG00000137547	-0.591329	-0.0110331	-0.0730436	-0.518413
	NOP56	ENSG00000101361	-0.867931	-1.35599				EEF2	ENSG00000167658	-0.146919	0.128554				PNRC2	ENSG00000189266	1.02694	-0.519629				ZNFX1	ENSG00000124201	-0.487257	-0.402992	0.0352279				SRSF12	ENSG00000154548	-0.0970612	-0.779408	1.48833				NOM1	ENSG00000146909	-0.586791	-0.239137	-0.580594	-0.512038
	BYSL	ENSG00000112578	-1.26342	-1.35574				CWF19L2	ENSG00000152404	-0.139891	0.277986				CNOT11	ENSG00000158435	0.0677769	-0.504945				FASTKD1	ENSG00000138399	-0.453445	0.414402	0.31381				EIF2S3L	ENSG00000180574	-0.0945078	0.0741625	-1.5074				MRPL34	ENSG00000130312	-0.58447	-0.23552	-0.493432	-0.666756
	EIF2B5	ENSG00000145191	-0.402704	-1.35456				LSM1	ENSG00000175324	-0.118703	0.0668791				GNL3	ENSG00000163938	0.863915	-0.49866				TRUB1	ENSG00000165832	-0.412506	0.251977	-0.238018				MRPS6	ENSG00000243927	-0.0913255	0.048081	0.106629				BOLL	ENSG00000152430	-0.565099	-0.293055	-0.398816	-0.094237
	POP1	ENSG00000104356	-0.847128	-1.35392				WDR43	ENSG00000163811	-0.118283	0.102001				MRPL17	ENSG00000158042	0.217203	-0.498227				KHDC1	ENSG00000135314	-0.385975	0.812974	-0.0846721				TFIP11	ENSG00000100109	-0.0869059	0.0672459	-0.287904				SLBP	ENSG00000163950	-0.563328	-0.700509	-1.32491	-0.0257511
	PRIM1	ENSG00000198056	-0.89444	-1.35288				MBNL1	ENSG00000152601	-0.114321	0.307595				EXOSC4	ENSG00000178896	0.428467	-0.497542				IFIT1B	ENSG00000204010	-0.381698	0	0				ZC3H10	ENSG00000135482	-0.0868433	0.355065	1.03851				ESRP1	ENSG00000104413	-0.561433	-0.886228	-0.888193	-0.315048
	DUS4L	ENSG00000105865	-1.10376	-1.3521				RPL3	ENSG00000100316	-0.10532	0.0342527				EIF2S2	ENSG00000125977	0.868692	-0.491964				TEFM	ENSG00000172171	-0.378426	0.0266678	-0.169652				PLD6	ENSG00000179598	-0.0862355	0.0753569	0.56121				MSI1	ENSG00000135097	-0.561351	-0.689524	-0.797283	-0.813353
	NCBP2	ENSG00000114503	-0.479398	-1.35153				NOC3L	ENSG00000173145	-0.102987	0.0267342				LSM4	ENSG00000130520	0.0924881	-0.490043				ESRP1	ENSG00000104413	-0.375719	0.00174145	0.200843				TNRC6C	ENSG00000078687	-0.0860537	0.916965	1.55366				FASTKD1	ENSG00000138399	-0.549815	-0.175967	-0.509869	-0.667645
	SNRPG	ENSG00000143977	-0.859817	-1.351				DDX25	ENSG00000109832	-0.0730015	0.40985				MRPS28	ENSG00000147586	1.43832	-0.489426				ERN2	ENSG00000134398	-0.375069	0.464167	0.525321				PDCD4	ENSG00000150593	-0.0836317	0.987167	0.878042				ENDOG	ENSG00000167136	-0.547418	-0.941104	-0.5306	-0.0119484
	WDR12	ENSG00000138442	-1.03297	-1.34459				GRSF1	ENSG00000132463	-0.0590747	0.300889				EFTUD2	ENSG00000108883	0.737055	-0.480644				IREB2	ENSG00000136381	-0.352623	0.471422	0.324308				NSUN6	ENSG00000241058	-0.0655607	0.0591721	-0.26853				MRPS30	ENSG00000112996	-0.540224	-0.173624	-0.185999	-0.275425
	POP7	ENSG00000172336	-0.927685	-1.3382				TNRC6B	ENSG00000100354	-0.051444	0.165748				MRPL16	ENSG00000166902	1.31372	-0.479324				RBMS2	ENSG00000076067	-0.345978	0.127186	0.0342294				MRPL33	ENSG00000243147	-0.0597293	-0.067172	0.300339				INTS9	ENSG00000104299	-0.539415	-1.17155	-0.702889	-0.891579
	PUS1	ENSG00000177192	-1.22314	-1.33708				LRRFIP1	ENSG00000124831	-0.0388067	0.567609				UTP20	ENSG00000120800	0.458174	-0.464564				SARNP	ENSG00000205323	-0.331759	0.168205	-0.264933				UTP3	ENSG00000132467	-0.0596424	0.126597	0.159266				MRPS35	ENSG00000061794	-0.537593	-0.307403	-0.119422	-0.614171
	SNRPE	ENSG00000182004	-1.16514	-1.32811				IFIT5	ENSG00000152778	-0.0345246	0.442009				EIF3M	ENSG00000149100	1.41006	-0.463497				DDX58	ENSG00000107201	-0.329526	0.500343	0.619854				RPS10	ENSG00000124614	-0.0589711	-0.0729042	0.641268				MRPS12	ENSG00000128626	-0.537408	-1.33856	-2.13716	-0.619804
	ALYREF	ENSG00000183684	-0.825649	-1.32631				SMAD9	ENSG00000120693	-0.0334237	0.36268				MRPS26	ENSG00000125901	0.51065	-0.463471				TRMT13	ENSG00000122435	-0.321467	0.0411686	-0.255153				RBMX	ENSG00000147274	-0.0570872	0.314671	0.24884				LARP1	ENSG00000155506	-0.531397	-0.27669	-0.247315	-0.173334
	SPATS2	ENSG00000123352	-1.22836	-1.32477				RBM43	ENSG00000184898	-0.0296822	0.348477				CARS2	ENSG00000134905	0.863879	-0.461431				IFIT1	ENSG00000185745	-0.316704	1.07483	0.876429				LSM11	ENSG00000155858	-0.0564634	1.05931	0.869682				MARS	ENSG00000166986	-0.531289	-0.122903	-0.168144	-0.591585
	LIN28A	ENSG00000131914	-4.63	-1.313				REXO1	ENSG00000079313	-0.0178916	0.0582338				ZC3H12D	ENSG00000178199	0.173943	-0.460423				TLR7	ENSG00000196664	-0.315559	1.94476	1.84492				RPS5	ENSG00000083845	-0.0496734	-0.0488696	0.640409				RPL17	ENSG00000265681	-0.524453	-0.465341	-0.507313	-0.722348
	TRMU	ENSG00000100416	-0.954071	-1.30958				SRSF7	ENSG00000115875	-0.00948632	0.105718				KIAA0391	ENSG00000100890	1.13353	-0.458623				CNOT6	ENSG00000113300	-0.313199	0.0576191	-0.133365				NMD3	ENSG00000169251	-0.0475533	0.0921011	-0.215256				MRPL3	ENSG00000114686	-0.520809	-0.405475	-0.637671	-0.775234
	AC004381.6	ENSG00000005189	-1.04528	-1.30176				RANBP2	ENSG00000153201	-0.00739229	0.384318				FTSJ3	ENSG00000108592	1.12047	-0.455299				ERI2	ENSG00000196678	-0.3123	0.127756	-0.155821				RBM3	ENSG00000102317	-0.0423756	-0.114033	0.498297				MEPCE	ENSG00000146834	-0.514598	-0.740192	-0.699722	-0.017329
	SNRPD1	ENSG00000167088	-0.828071	-1.29756			C4	TERT	ENSG00000164362	-4.71	-4.96	0.7303			TRMT10C	ENSG00000174173	1.35796	-0.454076				EIF5AL1	ENSG00000253626	-0.305391	0.00222103	-0.451424				SRBD1	ENSG00000068784	-0.0379222	0.0432114	-0.00155778				AARS	ENSG00000090861	-0.514164	-1.53257	-0.952811	-0.136222
	TFB2M	ENSG00000162851	-1.21194	-1.29684				TRIM71	ENSG00000206557	-2.56205	-4.95				ZC3H10	ENSG00000135482	0.773971	-0.453678				UPF2	ENSG00000151461	-0.291432	0.0539432	0.0292662				CRYZ	ENSG00000116791	-0.0377612	0.162709	0.32044				MARS2	ENSG00000247626	-0.512094	-0.255072	-0.829224	-0.427357
	NSUN2	ENSG00000037474	-1.04407	-1.28758				IGF2BP1	ENSG00000159217	-4.56787	-4.79				RUVBL2	ENSG00000183207	0.389694	-0.453035				MATR3	ENSG00000015479	-0.29124	0.207895	-0.245377				SMG1	ENSG00000157106	-0.0337209	0.281552	-0.499516				LARP1B	ENSG00000138709	-0.496441	-0.205188	-0.483437	-0.651871
	WDR4	ENSG00000160193	-0.922368	-1.27817				IGF2BP3	ENSG00000136231	-4.15388	-4.77758				CNBP	ENSG00000169714	1.05171	-0.451713				PARP4	ENSG00000102699	-0.282356	-0.349476	0.0922024				TNPO1	ENSG00000083312	-0.0264939	0.0859604	-0.0147067				ZC3H12C	ENSG00000149289	-0.493751	-0.559468	-0.709679	-0.504689
	LSM4	ENSG00000130520	-0.646671	-1.25012				DQX1	ENSG00000144045	-4.62	-4.7				MEPCE	ENSG00000146834	1.24061	-0.449169				PARP12	ENSG00000059378	-0.278915	-0.145787	0.447476				DZIP3	ENSG00000198919	-0.025887	0.472924	0.707195				GLTSCR2	ENSG00000105373	-0.486639	-0.729372	-0.695025	-0.041089
	ELAVL3	ENSG00000196361	-0.601206	-1.24777				EEF1A2	ENSG00000101210	-4.6	-3.93273				MRTO4	ENSG00000053372	1.10813	-0.445787				PPARGC1A	ENSG00000109819	-0.275545	2.08457	1.81278				KHDRBS3	ENSG00000131773	-0.0137373	-0.49081	0.389996				LUC7L2	ENSG00000269955	-0.483784	-0.823293	-0.407043	-0.823753
	CPSF4	ENSG00000160917	-0.808697	-1.2455				MKRN3	ENSG00000179455	-2.58295	-3.92007				SNRPA1	ENSG00000131876	0.272605	-0.442128				METTL10	ENSG00000203791	-0.270882	0.340618	0.0414012				RPL27A	ENSG00000166441	-0.0083816	-0.194005	0.681308				TRIM56	ENSG00000169871	-0.476082	-0.879836	-0.768464	-0.15594
	EIF4G1	ENSG00000114867	-0.446225	-1.24008				TDRD5	ENSG00000162782	-4.66	-3.59359				NOB1	ENSG00000141101	1.49126	-0.440678				ZCCHC14	ENSG00000140948	-0.265668	-0.285878	0.0929968				PUS3	ENSG00000110060	-0.00688768	-0.140369	0.183449				PPARGC1B	ENSG00000155846	-0.47558	-0.337988	-0.160882	-1.06633
	MRPL13	ENSG00000172172	-0.909193	-1.23575				EXO1	ENSG00000174371	-4.11563	-3.59147				LSG1	ENSG00000041802	0.424963	-0.43543				R3HCC1L	ENSG00000166024	-0.253245	0.179652	0.35629				ZC3HAV1	ENSG00000105939	-0.00666487	0.019363	-0.325578				RPS20	ENSG00000008988	-0.475413	-0.70858	-0.731574	-0.0689495
	POLR2J3	ENSG00000168255	-0.791041	-1.2348				CELF3	ENSG00000159409	-2.48111	-3.14017				LIN28A	ENSG00000131914	0	-0.430745				LSM12	ENSG00000161654	-0.252757	0.0121178	-0.317921				RPS27	ENSG00000177954	-0.00636245	0.342476	0.738088				SIDT2	ENSG00000149577	-0.469884	-0.125757	-0.203766	-0.544651
	BARD1	ENSG00000138376	-1.1113	-1.22865				MAEL	ENSG00000143194	-0.90254	-3.12844				GLTSCR2	ENSG00000105373	0.241854	-0.429079				EEF1G	ENSG00000254772	-0.234567	-0.0768461	0.201653				ZC3H8	ENSG00000144161	-0.00137637	0.214428	-0.653603				RAVER1	ENSG00000161847	-0.467783	-0.549316	-0.342531	-0.678204
	DHX34	ENSG00000134815	-1.00194	-1.22832				NANOS1	ENSG00000188613	-3.25626	-2.64481				RCL1	ENSG00000120158	0.396497	-0.415215				MAZ	ENSG00000103495	-0.226788	-0.262635	0.0467554				PPIL3	ENSG00000240344	-0.000829826	0.263552	-0.429037				MEX3C	ENSG00000176624	-0.466928	-0.494547	-0.736162	-0.675634
	HEATR1	ENSG00000119285	-1.05874	-1.22711				RBM24	ENSG00000112183	-0.0107918	-2.54629				WDR43	ENSG00000163811	0.462938	-0.408134				DDX60L	ENSG00000181381	-0.226248	0.606624	0.674929			C4	ERN2	ENSG00000134398	-0.719226	-4.95071	-0.500099	0.67			ARHGEF28	ENSG00000214944	-0.464626	-0.183212	-0.127529	-0.756618
	MAGOHB	ENSG00000111196	-0.830661	-1.22596				EZH2	ENSG00000106462	-2.3996	-2.3918				CWF19L2	ENSG00000152404	0.227259	-0.404101				TNPO1	ENSG00000083312	-0.210029	0.101328	-0.271365				IGF2BP1	ENSG00000159217	-3.36903	-4.43552	-4.91				AUH	ENSG00000148090	-0.464584	-0.791363	-0.504187	-0.00434882
	STRBP	ENSG00000165209	-0.747812	-1.21748				ELAVL2	ENSG00000107105	-3.26973	-2.36735				UTP11L	ENSG00000183520	1.06436	-0.400526				MOV10	ENSG00000155363	-0.208612	-0.455943	0.0964388				TERT	ENSG00000164362	-2.83666	-4.28365	-4.96				EIF2AK1	ENSG00000086232	-0.458349	-0.365582	-0.743884	-0.283199
	TRIT1	ENSG00000043514	-0.846268	-1.21167				MYEF2	ENSG00000104177	-4.44963	-2.28673				ERN1	ENSG00000178607	2.7882	-0.397417				APOBEC3F	ENSG00000128394	-0.206758	0.429179	0.290204				IGF2BP3	ENSG00000136231	-2.42586	-4.26581	-4.89				PDCD4	ENSG00000150593	-0.455696	-0.462254	-0.38901	-0.505574
	METTL1	ENSG00000037897	-1.41082	-1.21162				IGF2BP2	ENSG00000073792	-2.59659	-2.27823				ACO1	ENSG00000122729	2.2098	-0.394262				CXorf23	ENSG00000173681	-0.203394	0.075579	0.329093				DQX1	ENSG00000144045	-3.93199	-4.26234	-4.78				SMAD3	ENSG00000166949	-0.443758	-0.0930459	-0.186065	-0.448847
	IPO4	ENSG00000196497	-1.39575	-1.20413				ZFR2	ENSG00000105278	-1.21674	-1.96746				TRMT10A	ENSG00000145331	0.474824	-0.392945				GRSF1	ENSG00000132463	-0.192979	0.0534234	-0.139859				EEF1A2	ENSG00000101210	-2.43698	-3.99795	-2.70117				EIF3CL	ENSG00000205609	-0.429141	-0.483849	-0.661683	-0.0958104
	PRDX1	ENSG00000117450	-0.563289	-1.20057				ESRP1	ENSG00000104413	-4.62	-1.96133				RAVER2	ENSG00000162437	0.577784	-0.385405				RANBP2	ENSG00000153201	-0.191771	0.0216103	-0.321311				EXO1	ENSG00000174371	-3.47568	-3.49387	-4.68				NOL6	ENSG00000165271	-0.427284	-1.49202	-0.484968	-0.1055
	TARBP1	ENSG00000059588	-0.82194	-1.19911				KHDC1	ENSG00000135314	-3.3502	-1.94327				RAN	ENSG00000132341	0.210322	-0.384129				TRIM56	ENSG00000169871	-0.18613	-0.413579	0.0536184				RNASE10	ENSG00000182545	-2.28277	-3.20153	-4.22208				AIMP2	ENSG00000106305	-0.415754	-1.06665	-0.855796	-0.190775
	U2SURP	ENSG00000163714	-0.547136	-1.19848				NPM2	ENSG00000158806	-1.81759	-1.90318				MTRF1	ENSG00000120662	1.04045	-0.381996				IFIT5	ENSG00000152778	-0.179524	0.472134	0.26624				LIN28A	ENSG00000131914	-4.61	-3.18299	-2.40004				TARSL2	ENSG00000185418	-0.406825	-0.0282676	-0.300787	-0.801394
	R3HDM1	ENSG00000048991	-0.850593	-1.19834				RNASEH2A	ENSG00000104889	-1.44344	-1.86779				UTP14A	ENSG00000156697	0.0816342	-0.375617				ZMAT3	ENSG00000172667	-0.169598	0.273356	-0.134864				DNMT3B	ENSG00000088305	-1.53633	-2.70236	-2.52136				GFM2	ENSG00000164347	-0.400356	-0.385906	-0.693794	-0.173627
	MTIF2	ENSG00000085760	-0.78507	-1.19813				MEX3A	ENSG00000254726	-2.76045	-1.86719				PTRH2	ENSG00000141378	0.936565	-0.36274				MRPS28	ENSG00000147586	-0.153402	0.112924	-0.182788				OASL	ENSG00000135114	-2.40174	-2.60532	-4.61				UNKL	ENSG00000059145	-0.397074	-0.218306	-0.38829	-0.523739
	SNRPF	ENSG00000139343	-0.781657	-1.19493				ENOX1	ENSG00000120658	-2.24853	-1.82505				ERN2	ENSG00000134398	3.04647	-0.361113				MBNL3	ENSG00000076770	-0.150538	1.02702	0.640589				EZH2	ENSG00000106462	-2.34154	-2.55224	-4.52889				RPLP2	ENSG00000177600	-0.380972	-2.41058	-2.34925	-1.9488
	RPUSD1	ENSG00000007376	-1.00027	-1.18471				TARBP1	ENSG00000059588	-1.49932	-1.77892				PAN2	ENSG00000135473	0.697197	-0.353636				SEPSECS	ENSG00000109618	-0.146026	0.190353	0.402812				MEX3A	ENSG00000254726	-2.08753	-2.37166	-1.60152				XRN2	ENSG00000088930	-0.376339	-0.0727631	-0.138448	-0.078418
	MRPL21	ENSG00000197345	-0.775449	-1.18427				CELF5	ENSG00000161082	-2.14156	-1.77307				EXOSC7	ENSG00000075914	1.41062	-0.352835				BZW1	ENSG00000082153	-0.136254	0.274188	-0.0137329				ESRP2	ENSG00000103067	-1.06003	-2.29055	-4.26728				FASTKD5	ENSG00000215251	-0.369206	-0.0663768	-0.466042	-0.305039
	RPP25	ENSG00000178718	-0.463357	-1.18356				RPL39L	ENSG00000163923	-2.22243	-1.70211				TSEN54	ENSG00000182173	0.390234	-0.349644				JAKMIP1	ENSG00000152969	-0.132305	0.670091	0.41752				BOLL	ENSG00000152430	-0.312143	-2.10843	-4.40245				NPM2	ENSG00000158806	-0.368944	-0.30905	-0.234868	-1.02651
	ILF2	ENSG00000143621	-1.09407	-1.17515				DNMT3B	ENSG00000088305	-1.60539	-1.68802				EIF3L	ENSG00000100129	0.633276	-0.349537				MEX3C	ENSG00000176624	-0.1286	0.0935145	-0.121479				RNASEH2A	ENSG00000104889	-1.83348	-2.0099	-2.84543				RPP14	ENSG00000163684	-0.3679	-0.93584	-1.46922	-0.484916
	EIF3B	ENSG00000106263	-0.983791	-1.17461				PABPC1L	ENSG00000101104	-1.37514	-1.67877				ZFP36	ENSG00000128016	1.31445	-0.348588				SRPK2	ENSG00000135250	-0.124352	0.0444606	-0.178113				MKRN3	ENSG00000179455	-2.85958	-2.00511	-4.61				CDK5RAP1	ENSG00000101391	-0.36535	-0.290621	-0.398644	-0.750336
	PABPC1	ENSG00000070756	-1.07751	-1.17374				BOP1	ENSG00000261236	-0.873448	-1.65123				EIF2S1	ENSG00000134001	1.04483	-0.337157				CDC40	ENSG00000168438	-0.116352	0.355011	0.145605				ESRP1	ENSG00000104413	-1.66748	-1.99393	-4.24289				RPL13	ENSG00000167526	-0.362137	-0.8229	-0.375909	-0.959029
	PES1	ENSG00000100029	-0.492898	-1.17347				ELAVL3	ENSG00000196361	-4.43869	-1.62698				MRPL4	ENSG00000105364	0.968764	-0.336355				SRBD1	ENSG00000068784	-0.115917	0.256959	0.140446				ISG20	ENSG00000172183	-1.21573	-1.92531	-1.4105				DYNC1H1	ENSG00000197102	-0.35726	-1.1246	-0.744825	-0.447219
	EIF2S3L	ENSG00000180574	-0.579639	-1.16746				SPATS2	ENSG00000123352	-2.25249	-1.56392				BICC1	ENSG00000122870	1.35525	-0.330451				DHX40	ENSG00000108406	-0.110829	0.105641	-0.242044				YBX2	ENSG00000006047	-0.675039	-1.88274	-3.57291				SIDT1	ENSG00000072858	-0.353067	-0.896275	-1.00908	-0.542255
	GARS	ENSG00000106105	-1.08382	-1.16213				CELF6	ENSG00000140488	-0.504832	-1.52567				LARP4	ENSG00000161813	1.10447	-0.329216				NOVA2	ENSG00000104967	-0.0994218	0.235876	0.325413				RNASE2	ENSG00000169385	-1.1382	-1.86489	-2.68725				PET112	ENSG00000059691	-0.350268	-0.272224	-0.535417	-0.63821
	AIMP2	ENSG00000106305	-1.07924	-1.16082				RBM20	ENSG00000203867	-0.569329	-1.47234				CTU1	ENSG00000142544	0.336082	-0.322054				PEG10	ENSG00000242265	-0.0899264	1.48339	0.382867				OAS3	ENSG00000111331	-1.58349	-1.83876	-3.68311				DROSHA	ENSG00000113360	-0.346763	-0.653748	-0.489292	-0.791479
	MEX3D	ENSG00000181588	-0.864095	-1.15579				DDX39A	ENSG00000123136	-1.44989	-1.45625				MRP63	ENSG00000173141	0.348364	-0.319511				PRPF38A	ENSG00000134748	-0.0831407	0.0983259	0.0693847				GAPDH	ENSG00000111640	-1.11253	-1.80892	-1.4518				MRPL16	ENSG00000166902	-0.344535	-0.732454	-0.532322	-0.326036
	FARSB	ENSG00000116120	-0.840062	-1.15402				NOVA1	ENSG00000139910	-1.92165	-1.44047				EIF4B	ENSG00000063046	0.406241	-0.318858				ZC3H12D	ENSG00000178199	-0.0810095	-0.130994	0.824617				EXOSC4	ENSG00000178896	-1.54338	-1.75124	-0.849105				DCAF13	ENSG00000164934	-0.337455	-0.227043	-0.1887	-0.658781
	PARP1	ENSG00000143799	-0.97633	-1.15074				APOBEC2	ENSG00000124701	-2.04869	-1.42832				MRPS34	ENSG00000074071	0.419127	-0.317841				KIAA0391	ENSG00000100890	-0.0730304	0.355374	0.127154				DDX39A	ENSG00000123136	-1.53708	-1.74172	-1.61419				GFM1	ENSG00000168827	-0.333621	-0.140105	-0.297727	-0.0810763
	PNO1	ENSG00000115946	-0.619496	-1.15072				CELF4	ENSG00000101489	-2.59954	-1.42581				QTRT1	ENSG00000213339	0.376288	-0.316716				ZFP36L2	ENSG00000152518	-0.0685222	0.174794	0.119813				OAS2	ENSG00000111335	-1.71078	-1.71665	-3.16892				FRG1B	ENSG00000149531	-0.332871	-0.0801238	-0.124756	-0.551275
	MRPS26	ENSG00000125901	-0.81389	-1.14928				RPL22L1	ENSG00000163584	-1.58147	-1.42383				MRPS35	ENSG00000061794	1.03274	-0.31326				TRMT10A	ENSG00000145331	-0.0608669	0.381379	-0.117004				TRIM71	ENSG00000206557	-1.28504	-1.71335	-3.75306				TNRC6B	ENSG00000100354	-0.31806	-0.920071	-0.921014	-0.22735
	YARS2	ENSG00000139131	-0.705634	-1.1488				PABPC4L	ENSG00000254535	-0.328419	-1.41571				CCDC86	ENSG00000110104	0.845174	-0.302563				GTPBP2	ENSG00000172432	-0.0522583	-0.5377	0.000815892				MTG1	ENSG00000254536	-1.05506	-1.70306	-2.79557				PTGES3L-AARSD1	ENSG00000108825	-0.302682	-0.196836	-0.74263	-1.17065
	DROSHA	ENSG00000113360	-0.855256	-1.1482				EIF5A2	ENSG00000163577	-1.3209	-1.39086				DCP1B	ENSG00000151065	0.29794	-0.300854				CSDC2	ENSG00000172346	-0.05215	0.0469758	0.343052				OAS1	ENSG00000089127	-1.5243	-1.68538	-3.33441				RSRC1	ENSG00000174891	-0.301006	-0.957448	-1.41379	-0.383865
	NIFK	ENSG00000155438	-0.821538	-1.14662				ZNF239	ENSG00000196793	-2.61901	-1.37979				NOP58	ENSG00000055044	0.527765	-0.29869				GFM2	ENSG00000164347	-0.0509901	0.227342	-0.0105319				TDRKH	ENSG00000182134	-1.1817	-1.68153	-2.11956				MRPS26	ENSG00000125901	-0.296515	-0.567218	-0.67553	-0.635986
	UPF3B	ENSG00000125351	-0.622673	-1.14298				FBLL1	ENSG00000188573	-1.1988	-1.3614				POP7	ENSG00000172336	0.212003	-0.293072				SMAD5	ENSG00000113658	-0.0494452	0.135364	-0.387988				BOP1	ENSG00000261236	-1.59025	-1.6313	-1.50016				TSFM	ENSG00000123297	-0.295971	-0.620153	-0.577341	-0.873312
	SNRNP25	ENSG00000161981	-0.947674	-1.14178				AC004381.6	ENSG00000005189	-0.234767	-1.35953				MRPL34	ENSG00000130312	0.224179	-0.291618				SAMHD1	ENSG00000101347	-0.0484576	0.40941	0.409569				PABPC1L	ENSG00000101104	-0.663467	-1.61993	-3.28773				MRPL37	ENSG00000116221	-0.29553	-0.527853	-0.534052	-0.618728
	INTS8	ENSG00000164941	-1.15689	-1.14123				SMG5	ENSG00000198952	-0.990508	-1.33392				DDX55	ENSG00000111364	0.0460643	-0.291265				SPATS2L	ENSG00000196141	-0.0464676	0.580312	0.734169				RBM47	ENSG00000163694	-0.742257	-1.5931	-2.65243				RPL34	ENSG00000109475	-0.293309	-0.232613	-0.235543	-0.457758
	XPO1	ENSG00000082898	-0.684858	-1.13788				PRIM1	ENSG00000198056	-0.290992	-1.27223				ADAT2	ENSG00000189007	0.489634	-0.290397				LUC7L2	ENSG00000269955	-0.0403199	1.17577	0				TDRD5	ENSG00000162782	-0.887016	-1.56233	-4.8				REXO2	ENSG00000076043	-0.284258	-0.85382	-0.95073	-0.425118
	MRPL15	ENSG00000137547	-1.15204	-1.13787				BARD1	ENSG00000138376	-1.99353	-1.25576				EXOSC3	ENSG00000107371	0.828719	-0.28721				TRDMT1	ENSG00000107614	-0.0380465	0.405557	-0.0386858				MRPL12	ENSG00000262814	-1.47804	-1.54446	-1.24551				ESRP2	ENSG00000103067	-0.282811	-0.188654	-0.0897854	-0.550558
	MRTO4	ENSG00000053372	-0.949658	-1.13167				CPEB1	ENSG00000214575	-2.9091	-1.21199				MRPL37	ENSG00000116221	1.41933	-0.285835				LARP1B	ENSG00000138709	-0.0186911	0.196506	-0.106796				TDRD12	ENSG00000173809	-1.20964	-1.51433	-1.25323				PDE12	ENSG00000174840	-0.269196	-2.06019	-1.22046	-0.254872
	TRMT6	ENSG00000089195	-0.598429	-1.12485				TDRKH	ENSG00000182134	-0.747186	-1.2065				ZC3H12C	ENSG00000149289	0.567179	-0.2788				RARS2	ENSG00000146282	-0.0145402	0.0755576	-0.0891087				CELF4	ENSG00000101489	-1.45838	-1.51297	-3.20433				IREB2	ENSG00000136381	-0.26726	-0.473328	-0.596051	-0.819561
	C1QBP	ENSG00000108561	-0.676109	-1.12357				TDRD12	ENSG00000173809	-1.3779	-1.20046				PIWIL3	ENSG00000184571	0	-0.277336				DDX26B	ENSG00000165359	-0.00634428	0.363392	0.507003				RPL39L	ENSG00000163923	-1.45367	-1.51069	-2.4065				SRPR	ENSG00000182934	-0.262217	-0.453237	-0.086055	-0.302535
	RBM19	ENSG00000122965	-0.401137	-1.12219				SNRPE	ENSG00000182004	-1.05532	-1.17573				WDR4	ENSG00000160193	0.835557	-0.271771			C4	IGF2BP1	ENSG00000159217	-4.71	-4.71	-4.59299	0.7203			LSM4	ENSG00000130520	-1.42781	-1.49862	-1.40696				LSM4	ENSG00000130520	-0.259144	-0.000408486	-0.176869	-0.409764
	LSM1	ENSG00000175324	-0.549267	-1.12125				NANOS3	ENSG00000187556	-2.66759	-1.1714				DDX43	ENSG00000080007	1.86011	-0.268749				TRIM71	ENSG00000206557	-4.29209	-4.69	-4.66				DARS2	ENSG00000117593	-1.0269	-1.49468	-2.268				EIF4G1	ENSG00000114867	-0.252315	-3.34527	-1.91571	-0.350049
	LSM5	ENSG00000106355	-0.749918	-1.11683				CPSF4L	ENSG00000187959	-1.73784	-1.16809				ADAT3	ENSG00000213638	1.11457	-0.264698				PABPC1L	ENSG00000101104	-2.49047	-3.72767	-3.00187				CALR	ENSG00000179218	-1.10884	-1.47618	-1.05853				SRPK2	ENSG00000135250	-0.243812	-0.706935	-0.0982873	-0.209213
	MARS2	ENSG00000247626	-0.895316	-1.11484				SMG9	ENSG00000105771	-1.45406	-1.16102				SEPSECS	ENSG00000109618	0.321221	-0.264534				IGF2BP3	ENSG00000136231	-3.15839	-3.49522	-4.02868				RPL22L1	ENSG00000163584	-0.673961	-1.47518	-0.598957				EIF4B	ENSG00000063046	-0.241579	-0.857897	-0.911163	-0.82556
	WDR43	ENSG00000163811	-0.619015	-1.10989				DNMT1	ENSG00000130816	-1.21057	-1.15867				PNPT1	ENSG00000138035	0.369949	-0.261708				MEX3A	ENSG00000254726	-2.47325	-2.9612	-2.86783				BRCA1	ENSG00000012048	-1.13056	-1.45606	-3.03676				RPS27L	ENSG00000185088	-0.239589	-0.0303848	-0.325647	-1.00099
	EXOSC3	ENSG00000107371	-0.440331	-1.10328				SRSF12	ENSG00000154548	-1.42488	-1.15048				DDX21	ENSG00000165732	0.328383	-0.259013				CTU1	ENSG00000142544	-0.247423	-2.55236	-1.65819				JAKMIP1	ENSG00000152969	-2.81124	-1.44454	-1.55351				RPL15	ENSG00000174748	-0.237223	-0.947353	-0.87497	-1.0608
	RAN	ENSG00000132341	-0.686344	-1.10087				MTG1	ENSG00000254536	-1.38181	-1.14572				EXOSC2	ENSG00000130713	0.203772	-0.245667				PABPC3	ENSG00000151846	-0.604935	-2.46555	-1.87047				DNMT1	ENSG00000130816	-1.04509	-1.43581	-2.1579				EIF2S1	ENSG00000134001	-0.231777	-0.584509	-0.600914	-0.861569
	MRPL51	ENSG00000111639	-0.598384	-1.09783				RPL8	ENSG00000161016	-0.815745	-1.14352				SRSF7	ENSG00000115875	0.359412	-0.245174				PIWIL1	ENSG00000125207	-4.72	-2.40265	-4.6				DUS1L	ENSG00000169718	-0.956632	-1.43125	-1.08771				FAU	ENSG00000149806	-0.230342	-0.12844	-0.667208	-0.603908
	GEMIN2	ENSG00000092208	-0.869101	-1.09597				SNRPB	ENSG00000125835	-1.14348	-1.14237				RNASEL	ENSG00000135828	0.160147	-0.242868				MKRN3	ENSG00000179455	-0.884832	-2.2281	-0.94917				ADAT3	ENSG00000213638	-1.20595	-1.42881	-1.43688				GSPT1	ENSG00000103342	-0.209493	-3.47465	-1.19456	-0.663599
	SNRPD2	ENSG00000125743	-0.657995	-1.09337				DHX34	ENSG00000134815	-0.939974	-1.14029				DHX32	ENSG00000089876	1.20688	-0.240318				TERT	ENSG00000164362	-2.76537	-2.17634	-1.5939				PIWIL1	ENSG00000125207	-1.09481	-1.40124	-2.98775				RPL3	ENSG00000100316	-0.208294	-0.271341	-0.00943084	-0.665192
	NOL10	ENSG00000115761	-0.748745	-1.09003				RANBP17	ENSG00000204764	-2.6847	-1.13938				LUC7L2	ENSG00000269955	0.0958568	-0.238563				BOP1	ENSG00000261236	-1.19417	-2.1698	-1.9388				POLR2L	ENSG00000177700	-0.39922	-1.35236	-0.422437				MRPS22	ENSG00000175110	-0.203197	-0.173846	-0.349109	-0.549828
	PRPF19	ENSG00000110107	-0.679167	-1.08606				PABPC3	ENSG00000151846	-0.609235	-1.13717				EEF2	ENSG00000167658	0.519848	-0.221131				ZC3HAV1L	ENSG00000146858	-0.818481	-2.12636	-2.09977				MRPS12	ENSG00000128626	-1.28591	-1.33049	-1.38378				RBM47	ENSG00000163694	-0.202379	-0.095287	-0.0774114	-0.556937
	MRPL4	ENSG00000105364	-0.460276	-1.08131				ZC3H3	ENSG00000014164	-0.533137	-1.11972				RSRC1	ENSG00000174891	0.0878417	-0.210699				CPSF4L	ENSG00000187959	-0.767776	-2.07178	-0.877247				SIDT1	ENSG00000072858	-0.90091	-1.32153	-1.77113				YTHDF1	ENSG00000149658	-0.192285	-0.0614147	-0.729578	-1.08617
	PNPT1	ENSG00000138035	-0.740747	-1.07997				PCBP4	ENSG00000090097	-0.965212	-1.08542				NSUN4	ENSG00000117481	1.25753	-0.19388				DNMT3B	ENSG00000088305	-2.32808	-2.02931	-1.61062				SNRPF	ENSG00000139343	-0.948085	-1.31181	-0.950676				RSL24D1	ENSG00000137876	-0.191326	-0.148469	-0.454456	-0.489682
	DUS1L	ENSG00000169718	-1.24698	-1.07871				RAVER2	ENSG00000162437	-2.58643	-1.06355				MARS2	ENSG00000247626	1.92318	-0.190057				PTRH1	ENSG00000187024	-0.323949	-1.97835	-1.79118				MRPL14	ENSG00000180992	-1.34066	-1.26727	-0.798398				ZMAT5	ENSG00000100319	-0.188829	-0.407341	-0.569341	-0.398734
	PHF5A	ENSG00000100410	-0.151057	-1.0768				TCOF1	ENSG00000070814	-1.49441	-1.05061				DDX27	ENSG00000124228	0.151024	-0.189316				CD3EAP	ENSG00000117877	-1.21585	-1.80637	-1.78851				POLR2H	ENSG00000163882	-1.09952	-1.24036	-1.13819				RPL9	ENSG00000163682	-0.185365	-0.18745	-0.450257	-0.36725
	NOP58	ENSG00000055044	-0.807106	-1.07627				SF3B4	ENSG00000143368	-1.36743	-1.04975				RRS1	ENSG00000179041	0.575408	-0.177853				L1TD1	ENSG00000240563	-1.76129	-1.80083	-0.933168				TXNL4A	ENSG00000141759	-0.739945	-1.22772	-0.608714				RAE1	ENSG00000101146	-0.158231	-2.24354	-0.582073	-0.102127
	CPSF3	ENSG00000119203	-0.813437	-1.07507				RNASE2	ENSG00000169385	-0.843879	-1.03923				MVP	ENSG00000013364	1.65639	-0.174607				HELZ2	ENSG00000130589	-0.996955	-1.79053	-0.998152				THOC3	ENSG00000051596	-1.04052	-1.22482	-1.88848				MRPS24	ENSG00000062582	-0.15498	-0.774041	-0.560747	-0.0076723
	EIF6	ENSG00000242372	-0.830562	-1.07085				DCAF13	ENSG00000164934	-0.58471	-1.03166				AFF1	ENSG00000172493	0.535476	-0.174072				DHX34	ENSG00000134815	-1.00292	-1.75442	-1.29528				RPUSD1	ENSG00000007376	-1.42078	-1.21886	-1.10691				NOVA1	ENSG00000139910	-0.136601	-0.117027	-1.56877	-0.71945
	DDX49	ENSG00000105671	-0.438252	-1.07063				UNKL	ENSG00000059145	-0.891337	-1.02994				TRIT1	ENSG00000043514	0.0350741	-0.171942				GTF3A	ENSG00000122034	-0.439007	-1.71228	-1.85439				STRBP	ENSG00000165209	-1.15295	-1.21652	-1.4368				XPO4	ENSG00000132953	-0.111936	-0.309757	-0.254958	-0.694874
	EXOSC2	ENSG00000130713	-0.635353	-1.06999				CLK2	ENSG00000176444	-1.03005	-1.02637				MRPL19	ENSG00000115364	0.925679	-0.164465				WDR4	ENSG00000160193	-0.825022	-1.69684	-1.52328				SNRNP25	ENSG00000161981	-1.37186	-1.21057	-1.05637				SETD7	ENSG00000145391	-0.107987	-0.756555	-0.489732	-0.231776
	DENR	ENSG00000139726	-0.69204	-1.06502				TSEN54	ENSG00000182173	-1.56403	-1.0211				DDX28	ENSG00000182810	0.938432	-0.158519				EXOSC5	ENSG00000077348	-0.581461	-1.66523	-1.4066				MRPL55	ENSG00000162910	-1.16173	-1.20622	-0.450931				TAF9	ENSG00000085231	-0.101157	-2.80575	-2.33309	-1.15256
	PPAN	ENSG00000130810	-0.497762	-1.06157				PURG	ENSG00000172733	-1.82033	-1.00895				ZCCHC6	ENSG00000083223	0.503074	-0.157705				TRMT1	ENSG00000104907	-0.519667	-1.62662	-1.36876				ALYREF	ENSG00000183684	-1.2959	-1.1926	-0.974902				RPL7	ENSG00000147604	-0.100713	-0.638043	-0.988017	-0.722792
	RPL35A	ENSG00000182899	-0.287382	-1.06104				AGO2	ENSG00000123908	-1.29915	-1.00524				PES1	ENSG00000100029	0.717727	-0.150252				PUS1	ENSG00000177192	-0.990449	-1.62264	-1.57698				LSM7	ENSG00000130332	-1.03806	-1.1914	-0.71115				EIF5	ENSG00000100664	-0.0980245	-0.510693	-0.636331	-0.637304
	PRPF4	ENSG00000136875	-0.522629	-1.06056				UBAP2L	ENSG00000143569	-1.17248	-0.991061				ELAC2	ENSG00000006744	1.26119	-0.147632				BYSL	ENSG00000112578	-1.06645	-1.61701	-1.52813				POLR2I	ENSG00000105258	-0.701529	-1.19124	-0.340865				KHDRBS3	ENSG00000131773	-0.0880319	-0.116554	-0.414109	-1.09156
	PRPF40B	ENSG00000110844	-0.883751	-1.05964				TTF2	ENSG00000116830	-1.84423	-0.985236				ERI2	ENSG00000196678	0.987006	-0.143363				ZNF579	ENSG00000218891	-0.0794211	-1.59717	-1.18789				DDX49	ENSG00000105671	-0.828134	-1.19094	-0.892059				KIAA0391	ENSG00000100890	-0.0876461	-0.480891	-0.213612	-0.478771
	RIOK1	ENSG00000124784	-0.441795	-1.05815				INTS8	ENSG00000164941	-0.818094	-0.970325				SMAD6	ENSG00000137834	0.0949014	-0.142447				NOP2	ENSG00000111641	-1.13014	-1.55834	-1.407				MRPS34	ENSG00000074071	-1.42733	-1.18961	-1.12209				PAPD5	ENSG00000121274	-0.076875	-1.12291	-0.89053	-0.542203
	MRPL30	ENSG00000185414	-0.676193	-1.05506				LSM4	ENSG00000130520	-0.552422	-0.968769				TST	ENSG00000128311	4.12569	-0.141846				PUS7	ENSG00000091127	-1.49192	-1.5582	-1.68571				MRPS15	ENSG00000116898	-0.352131	-1.18443	-0.952473				RPS15A	ENSG00000134419	-0.073785	-0.245339	-1.17301	-1.23417
	MAZ	ENSG00000103495	-0.609599	-1.05468				SNRPD2	ENSG00000125743	-0.918576	-0.967558				RIOK3	ENSG00000101782	0.093157	-0.14006				ADAT2	ENSG00000189007	-1.04162	-1.55244	-1.48966				MAEL	ENSG00000143194	-3.29931	-1.17935	-3.34011				RPLP1	ENSG00000137818	-0.0681977	-0.0217966	-0.00667436	-0.829566
	RRP1	ENSG00000160214	-0.834204	-1.05031				NPM3	ENSG00000107833	-1.49801	-0.96752				MRPL46	ENSG00000259494	1.58028	-0.13296				EXOSC4	ENSG00000178896	-0.340116	-1.52669	-1.40376				MRPL15	ENSG00000137547	-0.863967	-1.15051	-0.636892				RBM28	ENSG00000106344	-0.0565464	-0.00341196	-0.0692496	-0.873069
	LSM7	ENSG00000130332	-0.68397	-1.04733				NSUN7	ENSG00000179299	-1.61943	-0.959895				NSUN2	ENSG00000037474	0.101354	-0.125813				POP1	ENSG00000104356	-1.20281	-1.50992	-1.43398				NOP2	ENSG00000111641	-0.99183	-1.14957	-1.38042				NPM3	ENSG00000107833	-0.0558818	-0.553571	-0.43811	-0.226079
	NOL11	ENSG00000130935	-0.762215	-1.04409				RBM3	ENSG00000102317	-1.62446	-0.95912				ILF3	ENSG00000129351	0.172022	-0.122465				TDRD5	ENSG00000162782	-2.72038	-1.50956	-1.14666				ENDOG	ENSG00000167136	-0.555999	-1.14774	-1.41328				ISG20	ENSG00000172183	-0.0526016	-0.0780273	-0.705483	-0.638887
	NKRF	ENSG00000186416	-0.625921	-1.04299				PABPC1	ENSG00000070756	-0.552248	-0.957644				RPUSD1	ENSG00000007376	0.0253195	-0.102709				RNASEH2A	ENSG00000104889	-0.786242	-1.50305	-1.49918				NPM3	ENSG00000107833	-0.785257	-1.14403	-0.571603				RBM3	ENSG00000102317	-0.047926	-0.331212	-0.426657	-1.04085
	MRPL37	ENSG00000116221	-0.71079	-1.04217				GTPBP2	ENSG00000172432	-1.38509	-0.955582				SLBP	ENSG00000163950	0.0646523	-0.10139				EIF2S3L	ENSG00000180574	-0.388778	-1.50095	-0.939612				MRPL23	ENSG00000214026	-0.900766	-1.14197	-0.598641				RPL27A	ENSG00000166441	-0.0436121	-0.175227	-0.544611	-0.788794
	TRMT2A	ENSG00000099899	-0.831522	-1.03604				ILF2	ENSG00000143621	-1.18437	-0.949616				DHX34	ENSG00000134815	0.477742	-0.0942443				RRP9	ENSG00000114767	-0.747253	-1.48018	-1.44995				MRPL47	ENSG00000136522	-0.973154	-1.13715	-1.38893				IARS	ENSG00000196305	-0.0300624	-0.255264	-0.565961	-0.904072
	WDR5	ENSG00000196363	-0.509223	-1.03557				BICC1	ENSG00000122870	-3.79778	-0.946845				GTPBP3	ENSG00000130299	0.512491	-0.083609				ZNF239	ENSG00000196793	-1.3041	-1.46671	-1.80905				RPP25	ENSG00000178718	-1.08222	-1.13103	-2.22424				C11orf68	ENSG00000175573	-0.0251843	-0.292054	-0.0840386	-0.775559
	NOP16	ENSG00000048162	-0.922035	-1.03219				XPO5	ENSG00000124571	-0.884322	-0.935726				YARS2	ENSG00000139131	0.492008	-0.0760211				RPUSD1	ENSG00000007376	-0.403953	-1.46195	-1.00698				RUVBL2	ENSG00000183207	-1.02164	-1.13076	-0.815904				RRP9	ENSG00000114767	-0.0247967	-0.615968	-0.650939	-1.02017
	LSM12	ENSG00000161654	-0.6651	-1.0197				WDR4	ENSG00000160193	-0.774327	-0.932461				SRPR	ENSG00000182934	0.585293	-0.0726572				EMG1	ENSG00000268439	-0.552335	-1.45655	-1.01539				ILF2	ENSG00000143621	-1.0203	-1.12935	-0.834166				TTF2	ENSG00000116830	-0.00897291	-0.189578	-0.246517	-0.444286
	PLD6	ENSG00000179598	-0.727723	-1.01746				RPSA	ENSG00000168028	-0.647558	-0.897847				POP1	ENSG00000104356	0.412912	-0.0722127				RAE1	ENSG00000101146	-0.78355	-1.44861	-1.33743				TTF2	ENSG00000116830	-0.407068	-1.12896	-2.07253				AGO2	ENSG00000123908	-0.00561252	-0.278582	-0.316931	-0.658063
	NAT10	ENSG00000135372	-0.680604	-1.01686				TRMU	ENSG00000100416	-0.671962	-0.895291				TRMT2A	ENSG00000099899	0.580112	-0.070466				MEX3D	ENSG00000181588	-0.547371	-1.43513	-1.27222				SLIRP	ENSG00000119705	-0.648097	-1.12796	-0.837428				CPEB3	ENSG00000107864	3.39573	0.553867	-0.729558	0.521789
	MRPL11	ENSG00000174547	-0.535668	-1.01484				TRMT1	ENSG00000104907	-0.888619	-0.895249				ENDOG	ENSG00000167136	1.26619	-0.0702118				LSM7	ENSG00000130332	-0.220991	-1.40595	-1.23861				PUS1	ENSG00000177192	-0.916421	-1.11937	-1.11942				SMAD1	ENSG00000170365	3.21919	-0.968331	-0.210826	1.99076
	MRPL24	ENSG00000143314	-1.13328	-1.01312				FBL	ENSG00000105202	-0.925317	-0.893615				DENR	ENSG00000139726	0.136304	-0.0672642				HNRNPCL1	ENSG00000179172	-0.88907	-1.3964	-1.4074				ELAVL4	ENSG00000162374	-0.762564	-1.1137	-2.4201				MRPL47	ENSG00000136522	3.10752	-0.383424	-0.117173	0.278234
	PPIH	ENSG00000171960	-0.695377	-1.01239				RRS1	ENSG00000179041	-0.661224	-0.886408				PUS1	ENSG00000177192	0.831012	-0.0663704				DDX27	ENSG00000124228	-0.790115	-1.39368	-1.07937				EIF5AL1	ENSG00000253626	-0.719335	-1.11316	-0.133489				MBNL1	ENSG00000152601	3.08735	-1.59756	-0.712552	1.00732
	INTS7	ENSG00000143493	-0.8871	-1.00907				NSUN5	ENSG00000130305	-0.869101	-0.886059				EIF2B3	ENSG00000070785	1.29068	-0.0621311				NKRF	ENSG00000186416	-0.918928	-1.39272	-1.3949				INTS7	ENSG00000143493	-1.25829	-1.10389	-2.21542				UHMK1	ENSG00000152332	2.66479	-0.135358	0.108065	-4.66
	ZNF598	ENSG00000167962	-0.825304	-1.00404				RPS21	ENSG00000171858	-0.782486	-0.884231				EXOSC5	ENSG00000077348	1.03082	-0.0612463				DKC1	ENSG00000130826	-1.24398	-1.38951	-1.49961				WDR4	ENSG00000160193	-0.828621	-1.09939	-1.05856				PRPF40B	ENSG00000110844	2.65	-0.506378	-1.53478	0.824086
	MRPS30	ENSG00000112996	-0.593091	-1.00373				ZC3HAV1L	ENSG00000146858	-2.90468	-0.883868				RRBP1	ENSG00000125844	1.47492	-0.0591403				RRS1	ENSG00000179041	-0.774954	-1.3862	-1.3774				LSMD1	ENSG00000183011	-0.774623	-1.08715	-0.432703				RPL41	ENSG00000229117	2.55207	-0.864811	-0.819243	3.16865
	PUSL1	ENSG00000169972	-1.22814	-1.00201				HEATR1	ENSG00000119285	-1.32769	-0.878852				TRDMT1	ENSG00000107614	0.0373261	-0.0546694				TARBP1	ENSG00000059588	-1.11756	-1.37282	-1.23268				NOP16	ENSG00000048162	-0.870823	-1.08534	-1.07516				RPS4X	ENSG00000198034	2.37358	-0.531514	-1.08476	1.71078
	DDX10	ENSG00000178105	-0.594618	-0.996363				NOP56	ENSG00000101361	-1.03306	-0.877639				IFIT2	ENSG00000119922	0.262097	-0.0534874				EXO1	ENSG00000174371	-2.14921	-1.36027	-1.55444				MRPS26	ENSG00000125901	-0.958451	-1.07903	-0.588161				NMD3	ENSG00000169251	2.27874	-0.215658	1.02679	2.92756
	TRMT1	ENSG00000104907	-0.689582	-0.995983				UPF3B	ENSG00000125351	-0.805151	-0.873586				MRPS31	ENSG00000102738	0.25928	-0.0507606				NOC4L	ENSG00000184967	-0.52005	-1.3559	-1.00203				POP5	ENSG00000167272	-0.130142	-1.07681	-0.854787				MRPL46	ENSG00000259494	1.81427	-1.4004	-0.652709	3.86875
	EIF4A3	ENSG00000141543	-0.696637	-0.994477				RNASE1	ENSG00000129538	-0.576574	-0.873389				WDR12	ENSG00000138442	0.204486	-0.0473697				UTP14A	ENSG00000156697	-0.69781	-1.35322	-1.35224				SNRPB	ENSG00000125835	-1.2993	-1.0751	-1.06922				ELAVL3	ENSG00000196361	1.79108	-0.203848	0.430879	2.34814
	MRPS34	ENSG00000074071	-0.874609	-0.992454				SNRPC	ENSG00000124562	-0.364887	-0.871955				NANOS1	ENSG00000188613	1.39674	-0.0465021				TSEN2	ENSG00000154743	-0.504517	-1.34971	-1.07966				MRPL13	ENSG00000172172	-1.26326	-1.0745	-1.0136				MRPL32	ENSG00000106591	1.68389	-0.149161	0.101564	-0.218942
	MRPS24	ENSG00000062582	-0.853836	-0.991683				CSTF2	ENSG00000101811	-0.792202	-0.86726				GSPT1	ENSG00000103342	1.52309	-0.0453512				XPO5	ENSG00000124571	-1.18284	-1.34905	-1.2209				PUSL1	ENSG00000169972	-1.26084	-1.07445	-0.890678				RPS14	ENSG00000164587	1.43074	-1.21471	-0.715725	0.396635
	SF3B14	ENSG00000115128	-0.674878	-0.989578				NOL3	ENSG00000140939	-1.21322	-0.862912				DUS1L	ENSG00000169718	0.230956	-0.0422254				RPP25	ENSG00000178718	-0.966838	-1.34803	-0.527035				ELAVL3	ENSG00000196361	-3.01384	-1.073	-0.762847				RPL10	ENSG00000147403	1.33611	-0.310898	-0.330493	0.455634
	NSUN5	ENSG00000130305	-1.00966	-0.989456				ZNF579	ENSG00000218891	-1.21872	-0.861344				TSEN2	ENSG00000154743	0.349001	-0.0327045				ZNF598	ENSG00000167962	-0.20381	-1.34529	-0.88555				CPSF3	ENSG00000119203	-0.548416	-1.07229	-1.20854				POLR2L	ENSG00000177700	1.29095	-1.45121	0.115393	0.766519
	DDX55	ENSG00000111364	-0.887772	-0.986682				PIWIL1	ENSG00000125207	-2.22135	-0.852716				RAE1	ENSG00000101146	0.0220321	-0.0295529				GTPBP3	ENSG00000130299	-0.431446	-1.34325	-1.02371				CCRN4L	ENSG00000151014	-0.608679	-1.06955	-1.48305				PRKDC	ENSG00000253729	1.28187	-0.0222113	0.449779	-1.02416
	WDR3	ENSG00000065183	-0.72363	-0.984937				RPS19	ENSG00000105372	-1.01452	-0.851222				NAT10	ENSG00000135372	0.698294	-0.0274731				NPM2	ENSG00000158806	-1.05012	-1.33316	-1.76173				LONP1	ENSG00000196365	-0.667261	-1.06939	-0.478717				NPM1	ENSG00000181163	1.26659	1.14146	-0.0614259	0.0977143
	EIF5A	ENSG00000132507	-0.58971	-0.983474				GPATCH4	ENSG00000160818	-1.0603	-0.8401				VARS2	ENSG00000137411	0.30942	-0.0228511				NXT1	ENSG00000132661	-0.251785	-1.3253	-1.44038				SNRPA1	ENSG00000131876	-0.885152	-1.0655	-1.22128				RBFOX1	ENSG00000078328	1.18531	-0.00539177	-0.0717148	1.65051
	NOB1	ENSG00000141101	-0.737002	-0.982738				CPSF4	ENSG00000160917	-0.386808	-0.834318				NUFIP1	ENSG00000083635	0.234291	-0.0142182				NOP56	ENSG00000101361	-1.01566	-1.32307	-1.42937				NOP10	ENSG00000182117	-0.406559	-1.06289	-0.817186				RPS6	ENSG00000137154	1.14893	0.559072	-0.398287	2.31364
	CTU1	ENSG00000142544	-0.232336	-0.974122				CPSF1	ENSG00000071894	-0.421852	-0.832796				BOLL	ENSG00000152430	0	-0.00566251				RUVBL1	ENSG00000175792	-0.887708	-1.31776	-1.37486				BZW2	ENSG00000136261	-0.880892	-1.05487	-1.35303				DDX24	ENSG00000089737	1.10631	-0.0614794	1.41403	0.634608
	RRS1	ENSG00000179041	-1.02548	-0.972894				ADAT2	ENSG00000189007	-0.185568	-0.83054				MTIF2	ENSG00000085760	0.409076	-0.00510683				NUFIP1	ENSG00000083635	-0.690866	-1.31277	-1.35237				GEMIN7	ENSG00000142252	-0.854656	-1.04763	-0.99992				EIF3E	ENSG00000104408	1.05908	-0.778967	-0.340811	2.02782
	MARS	ENSG00000166986	-0.872194	-0.971748				ILF3	ENSG00000129351	-1.20805	-0.828585				HRSP12	ENSG00000132541	2.6314	-0.00299767				CCDC86	ENSG00000110104	-0.821973	-1.29793	-1.27113				SNRPD1	ENSG00000167088	-0.890885	-1.04444	-1.07843				MRPS15	ENSG00000116898	0.959962	-0.880533	-0.00169193	2.00755
	RPS7	ENSG00000171863	-0.642442	-0.96674				RPL38	ENSG00000172809	-0.529927	-0.824447				MRPL30	ENSG00000185414	0.221756	-0.00258085				METTL1	ENSG00000037897	-0.913014	-1.29526	-1.40128				EIF5A	ENSG00000132507	-0.729999	-1.04441	-0.925252				IPO13	ENSG00000117408	0.911823	-0.355163	0.599509	-1.7435
	RPLP0	ENSG00000089157	-0.6838	-0.962115				RPL30	ENSG00000156482	-0.0647485	-0.815394			C3	C9orf129	ENSG00000204352	-5.23507	2.10163	-0.452			CMSS1	ENSG00000184220	-0.594821	-1.27005	-1.4709				WARS	ENSG00000140105	-0.417368	-1.04165	-1.9653				STAU2	ENSG00000040341	0.880988	-0.246547	-0.335456	0.407467
	USP39	ENSG00000168883	-0.554941	-0.961752				DDX49	ENSG00000105671	-0.353832	-0.805168				ZFR2	ENSG00000105278	-4.96331	3.09346				RPL22L1	ENSG00000163584	-1.1068	-1.26968	-2.07652				MRPL41	ENSG00000182154	-0.885998	-1.03769	-0.571067				RCL1	ENSG00000120158	0.789969	0.293436	-0.0569434	1.14806
	MRPS35	ENSG00000061794	-0.88936	-0.959988				DARS2	ENSG00000117593	-0.536355	-0.801773				RBFOX1	ENSG00000078328	-4.9223	4.62				CTU2	ENSG00000174177	-0.234003	-1.26233	-1.16791				TRPT1	ENSG00000149743	-0.502534	-1.03695	-0.412192				RPL13A	ENSG00000142541	0.788055	-0.261197	-0.113446	0.013024
	NMD3	ENSG00000169251	-0.340896	-0.957344				PRKDC	ENSG00000253729	-0.810504	-0.794671				TDRD1	ENSG00000095627	-4.83929	1.21088				RRP12	ENSG00000052749	-0.960037	-1.25816	-1.40726				CD3EAP	ENSG00000117877	-1.15492	-1.03687	-1.7915				TRMT10C	ENSG00000174173	0.744225	-0.0808997	0.479084	1.00889
	TRMT10C	ENSG00000174173	-0.253004	-0.949134				LSM11	ENSG00000155858	-0.57408	-0.792833				SRRM4	ENSG00000139767	-4.70408	3.15261				RRP1	ENSG00000160214	-0.509773	-1.25403	-1.19827				SPATS2	ENSG00000123352	-0.887346	-1.03575	-0.832378				SMG5	ENSG00000198952	0.729447	-0.176272	-0.162907	1.2782
	DNMT1	ENSG00000130816	-0.673505	-0.945827				ALYREF	ENSG00000183684	-0.857275	-0.787892				ELAVL3	ENSG00000196361	-4.63323	2.13929				URB2	ENSG00000135763	-1.19662	-1.24977	-1.22204				TARS2	ENSG00000143374	-1.08028	-1.03229	-1.14996				MRPS28	ENSG00000147586	0.694576	0.224405	-0.0307403	0.261893
	GFM1	ENSG00000168827	-0.310987	-0.943169				MEX3B	ENSG00000183496	-2.10898	-0.776994				LIN28B	ENSG00000187772	-4.6	0.233504				TBRG4	ENSG00000136270	-0.632403	-1.24652	-0.896354				RPL28	ENSG00000108107	-0.654636	-1.02999	-0.320665				PRPF6	ENSG00000101161	0.677747	0.917175	-0.434113	0.104963
	EMG1	ENSG00000268439	-0.834398	-0.940393				EPRS	ENSG00000136628	-1.10262	-0.771065				DQX1	ENSG00000144045	-4.59382	0.53501				HENMT1	ENSG00000162639	-1.33185	-1.23315	-1.14971				IFIT1	ENSG00000185745	-1.46886	-1.02974	-1.20969				MRPL4	ENSG00000105364	0.609017	-0.0179125	-0.699221	0.0513676
	FARSA	ENSG00000179115	-0.473154	-0.931399				RPS10	ENSG00000124614	-0.804655	-0.769932				CELF3	ENSG00000159409	-4.5	3.28052				CPSF1	ENSG00000071894	-0.4374	-1.23227	-0.872919				YARS	ENSG00000134684	-0.763395	-1.02812	-1.43582				CIRBP	ENSG00000099622	0.591829	-1.43988	0.261306	0.620331
	TARS2	ENSG00000143374	-1.07695	-0.924044				MRPS23	ENSG00000181610	-0.818353	-0.769188				CELF5	ENSG00000161082	-4.5	3.82749				DUS3L	ENSG00000141994	-0.239646	-1.2298	-0.991058				MARS	ENSG00000166986	-0.747988	-1.02145	-1.1024				GLE1	ENSG00000119392	0.555985	-0.406611	0.500037	2.69401
	CNOT11	ENSG00000158435	-1.14932	-0.923944				MAZ	ENSG00000103495	-0.632591	-0.765285				PCBP3	ENSG00000183570	-4.49685	2.23511				NPM3	ENSG00000107833	-0.712317	-1.22745	-1.59236				HNRNPAB	ENSG00000197451	-1.10388	-1.01755	-1.09454				NCBP2	ENSG00000114503	0.534075	-0.0772577	0.0865103	-0.17436
	RPS19	ENSG00000105372	-0.629631	-0.918202				RPS5	ENSG00000083845	-0.689873	-0.763015				DDX25	ENSG00000109832	-4.38061	2.00449				FBL	ENSG00000105202	-0.358032	-1.22706	-1.12429				RANBP17	ENSG00000204764	-0.98159	-1.0057	-2.36714				ADAT3	ENSG00000213638	0.505738	-0.119077	0.282482	0.606158
	TCOF1	ENSG00000070814	-0.650489	-0.918093				RRP9	ENSG00000114767	-0.336365	-0.7622				TRIM71	ENSG00000206557	-4.33501	0.838862				NOB1	ENSG00000141101	-0.319069	-1.22475	-1.19627				PPIH	ENSG00000171960	-0.738921	-1.005	-1.2724				ZCCHC6	ENSG00000083223	0.487455	-0.526951	0.00960997	0.393451
	SNRPC	ENSG00000124562	-0.809312	-0.917863				SUGP2	ENSG00000064607	-0.585988	-0.754031				PAPOLB	ENSG00000218823	-4.13	1.55113				EIF3B	ENSG00000106263	-0.575145	-1.22048	-1.15374				PARP1	ENSG00000143799	-1.23744	-1.00004	-1.33209				RBM20	ENSG00000203867	0.482661	-0.0103721	-0.232009	1.48807
	NPM2	ENSG00000158806	-0.491407	-0.916464				RPL7	ENSG00000147604	-0.663889	-0.750167				JAKMIP1	ENSG00000152969	-4.12	4.14683				SMAD6	ENSG00000137834	-0.616373	-1.2176	-0.876167				TBRG4	ENSG00000136270	-0.759854	-0.999616	-0.796944				MRPL13	ENSG00000172172	0.456932	-0.170246	-0.408402	1.80429
	FASTK	ENSG00000164896	-0.891963	-0.910457				MRPS12	ENSG00000128626	-0.562597	-0.740532				CELF4	ENSG00000101489	-4.11	4.69056				ZC3H12A	ENSG00000163874	-0.181651	-1.21511	-0.819104				TARBP2	ENSG00000139546	-0.742967	-0.999078	-0.98412				BZW2	ENSG00000136261	0.441548	-0.463436	-0.331569	0.23469
	MRPL19	ENSG00000115364	-0.675906	-0.909201				PRPF40B	ENSG00000110844	-1.12438	-0.739219				ELAVL4	ENSG00000162374	-4.1	2.46995				NSUN5	ENSG00000130305	-0.610564	-1.21295	-0.992137				TRMU	ENSG00000100416	-0.683311	-0.997966	-0.899435				ZNF106	ENSG00000103994	0.430115	-2.03602	-1.09339	0.316311
	IARS	ENSG00000196305	-0.758136	-0.908353				REPIN1	ENSG00000214022	-0.152348	-0.734081				FBLL1	ENSG00000188573	-3.80058	2.27724				IPO4	ENSG00000196497	-1.02402	-1.21186	-1.34027				HENMT1	ENSG00000162639	-0.860568	-0.996657	-2.2683				MYEF2	ENSG00000104177	0.396433	-0.657078	-0.341385	0.304663
	HENMT1	ENSG00000162639	-0.590212	-0.902818				RPL28	ENSG00000108107	-0.720117	-0.732633				SIDT1	ENSG00000072858	-3.78582	2.37014				NAT10	ENSG00000135372	-0.817416	-1.21025	-1.05357				IPO4	ENSG00000196497	-0.950279	-0.985733	-0.570825				DENR	ENSG00000139726	0.375264	-0.129839	-0.142455	0.260174
	POLR2J	ENSG00000005075	-0.806199	-0.902756				BRCA1	ENSG00000012048	-0.613559	-0.732624				ELAVL2	ENSG00000107105	-3.59918	3.52634				OAS3	ENSG00000111331	-1.18657	-1.21024	-0.758794				PARP12	ENSG00000059378	-0.950166	-0.98228	-1.40928				DCP1B	ENSG00000151065	0.369432	-0.192073	-0.0589482	0.520153
	RUVBL2	ENSG00000183207	-0.410462	-0.897535				RALY	ENSG00000125970	-0.917777	-0.729306				NANOS3	ENSG00000187556	-3.31938	0.614254				ELAVL2	ENSG00000107105	-0.458231	-1.20335	-0.523936				FARSA	ENSG00000179115	-0.911187	-0.981329	-1.11112				LSG1	ENSG00000041802	0.3633	-0.388943	0.117493	1.38738
	GTPBP4	ENSG00000107937	-0.814306	-0.891193				SNRPD1	ENSG00000167088	-1.10913	-0.726418				MOV10L1	ENSG00000073146	-3.24093	1.42294				NOL6	ENSG00000165271	-0.876664	-1.20289	-1.06451				CNOT11	ENSG00000158435	-0.66418	-0.975181	-0.906321				RPS25	ENSG00000118181	0.349186	-0.281313	-0.152122	0.189225
	TARBP2	ENSG00000139546	-0.742902	-0.89119				NPM1	ENSG00000181163	-0.917472	-0.722494				NOVA2	ENSG00000104967	-3.0809	1.5248				CDK5RAP1	ENSG00000101391	-0.647309	-1.19338	-1.04695				POLR2J	ENSG00000005075	-0.883565	-0.974954	-0.579687				EIF3L	ENSG00000100129	0.345216	-1.26333	0.236565	-1.27972
	EIF5AL1	ENSG00000253626	-0.591304	-0.888895				RPS20	ENSG00000008988	-0.223035	-0.710003				CPEB1	ENSG00000214575	-3.05504	2.56656				SNRPB	ENSG00000125835	-0.667505	-1.19252	-1.14087				YARS2	ENSG00000139131	-0.487097	-0.971674	-0.703823				RNASE6	ENSG00000169413	0.328681	-0.272736	-0.975682	1.80095
	URB1	ENSG00000142207	-1.13762	-0.888067				RBM46	ENSG00000151962	-0.615806	-0.707935				RBM20	ENSG00000203867	-2.99654	0.555747				DDX39A	ENSG00000123136	-0.63968	-1.19065	-1.13431				EIF2AK1	ENSG00000086232	-0.910084	-0.964645	-0.92088				MTIF2	ENSG00000085760	0.32035	-0.213259	-0.18491	0.0906262
	RBM28	ENSG00000106344	-0.722308	-0.884879				EIF2S3L	ENSG00000180574	-0.744275	-0.702543				PURG	ENSG00000172733	-2.9963	0.098823				DDX31	ENSG00000125485	-0.859095	-1.18933	-1.11541				PRDX1	ENSG00000117450	-1.02557	-0.962583	-0.956676				LRRFIP2	ENSG00000093167	0.280936	-0.221203	0.219211	-1.44637
	NXT2	ENSG00000101888	-0.440319	-0.884489				CTU1	ENSG00000142544	-0.173146	-0.695523				TDRD5	ENSG00000162782	-2.76597	3.06235				PUSL1	ENSG00000169972	-0.240309	-1.18824	-0.976569				XPO5	ENSG00000124571	-0.825188	-0.958871	-1.23231				EIF3M	ENSG00000149100	0.279125	-0.199626	-0.230632	0.47407
	SLBP	ENSG00000163950	-0.728822	-0.880799				FASTK	ENSG00000164896	-0.183945	-0.688578				EEF1A2	ENSG00000101210	-2.73625	3.05842				DCAF13	ENSG00000164934	-1.23824	-1.18089	-1.31137				ZNF385A	ENSG00000161642	-0.762977	-0.953263	-2.88016				NCBP1	ENSG00000136937	0.275122	-0.598663	-0.384137	0.423413
	DDX56	ENSG00000136271	-0.913183	-0.878405				RPL23A	ENSG00000198242	-0.641737	-0.687992				PIWIL2	ENSG00000197181	-2.68167	0.647802				PABPC1	ENSG00000070756	-0.316985	-1.17888	-0.979801				GARS	ENSG00000106105	-0.936923	-0.953101	-0.560337				ZMAT3	ENSG00000172667	0.263202	-0.264206	0.3835	-0.839374
	RBM38	ENSG00000132819	-0.63899	-0.874399				RPUSD1	ENSG00000007376	-0.807329	-0.682515				DZIP1	ENSG00000134874	-2.68145	0.53082				RANBP17	ENSG00000204764	-1.41589	-1.17769	-1.44093				RRP1	ENSG00000160214	-0.946488	-0.950247	-1.00806				NUDT16L1	ENSG00000168101	0.244439	0.210068	-0.0579961	0.175441
	CLK2	ENSG00000176444	-1.04368	-0.864965				EXOSC5	ENSG00000077348	-0.522028	-0.681539				KHDRBS3	ENSG00000131773	-2.62697	0.127848				DDX56	ENSG00000136271	-0.500981	-1.17593	-1.06403				FASTKD1	ENSG00000138399	-0.319212	-0.946501	-1.48372				RPS29	ENSG00000213741	0.241358	-1.0936	2.10593	0.311642
	PTRH2	ENSG00000141378	-1.00941	-0.863779				POP1	ENSG00000104356	-1.117	-0.675931				PPARGC1B	ENSG00000155846	-2.57069	1.76325				EZH2	ENSG00000106462	-1.40209	-1.17434	-1.29821				CSTF2	ENSG00000101811	-0.887767	-0.938748	-1.69493				RPL12	ENSG00000197958	0.232796	-1.30621	-0.107425	0.082096
	TSEN54	ENSG00000182173	-0.837124	-0.863542				PUS1	ENSG00000177192	-0.136988	-0.670666				A1CF	ENSG00000148584	-2.34924	1.88436				YTHDF1	ENSG00000149658	-0.660782	-1.15731	-1.00609				SNRPG	ENSG00000143977	-0.983618	-0.937869	-1.17902				IFIH1	ENSG00000115267	0.202882	0.232435	-0.026138	1.20751
	TSFM	ENSG00000123297	-0.923348	-0.863393				RPLP2	ENSG00000177600	-0.779437	-0.66755				ZC3H12B	ENSG00000102053	-2.21812	2.9837				XPOT	ENSG00000184575	-0.874856	-1.15714	-1.36146				POP7	ENSG00000172336	-1.1048	-0.933065	-0.934835				RBFOX2	ENSG00000100320	0.187535	-0.0803305	0.465188	0.395002
	MRPS22	ENSG00000175110	-0.0660389	-0.863351				RRP12	ENSG00000052749	-1.08411	-0.667459				HABP4	ENSG00000130956	-2.19406	1.70912				LAS1L	ENSG00000001497	-0.288668	-1.13189	-1.02813				NUTF2	ENSG00000102898	-0.653678	-0.931795	-0.480248				MRPL39	ENSG00000154719	0.18442	-0.969732	-0.720596	0.0790346
	DUS3L	ENSG00000141994	-0.212785	-0.863241				ZNF473	ENSG00000142528	-0.555412	-0.664496				HTATSF1	ENSG00000102241	-2.16898	0.567064				PPRC1	ENSG00000148840	-0.562205	-1.12142	-1.02034				TLR8	ENSG00000101916	-0.258174	-0.929675	-1.80781				ERN1	ENSG00000178607	0.175607	-0.530975	-0.204391	0.534013
	URB2	ENSG00000135763	-0.710418	-0.855328				BZW2	ENSG00000136261	-1.21973	-0.664441				MEX3B	ENSG00000183496	-2.07867	0.08992				GARS	ENSG00000106105	-0.630758	-1.12106	-1.24246				CARS2	ENSG00000134905	-0.368879	-0.927746	-0.321067				RBM7	ENSG00000076053	0.163399	-0.446548	-0.264079	0.532537
	TRUB2	ENSG00000167112	-0.796916	-0.854771				CLASRP	ENSG00000104859	-0.171268	-0.660263				TDRD6	ENSG00000180113	-2.06733	2.0654				EIF2S2	ENSG00000125977	-0.464344	-1.11378	-1.12412				ZC3H3	ENSG00000014164	-1.07259	-0.924054	-0.651981				NKRF	ENSG00000186416	0.120255	0.397746	-0.141392	0.142029
	ERI2	ENSG00000196678	-0.575479	-0.825822				PTRH1	ENSG00000187024	-0.465289	-0.658119				POLR2F	ENSG00000100142	-2.04306	2.80351				DHX37	ENSG00000150990	-0.778295	-1.11308	-0.860576				TSEN54	ENSG00000182173	-1.2916	-0.916587	-1.41484				DKC1	ENSG00000130826	0.0993293	-0.279189	0.0261126	0.595096
	SF3B4	ENSG00000143368	-0.762026	-0.824147				PARP1	ENSG00000143799	-0.348588	-0.656688				RBM24	ENSG00000112183	-1.99386	1.97184				TCOF1	ENSG00000070814	-0.865103	-1.10798	-1.11745				RRP12	ENSG00000052749	-0.854513	-0.914264	-0.725883				HNRNPA1	ENSG00000135486	0.0914262	-0.481583	-0.469696	0.227789
	RPL17	ENSG00000265681	-0.516398	-0.823541				RPLP1	ENSG00000137818	-0.497516	-0.650811				EIF4E1B	ENSG00000175766	-1.93936	4.61				RBM28	ENSG00000106344	-0.685837	-1.10218	-1.09158				RUVBL1	ENSG00000175792	-1.0677	-0.912986	-1.23662				ZNFX1	ENSG00000124201	0.0661378	0.148097	-0.113942	0.353969
	GEMIN7	ENSG00000142252	-0.859236	-0.821135				CD3EAP	ENSG00000117877	-1.0174	-0.648783				SPATS2	ENSG00000123352	-1.93181	0.279576				RUVBL2	ENSG00000183207	-0.444562	-1.1018	-1.04957				MRPL17	ENSG00000158042	-1.03584	-0.910623	-0.877945				G3BP2	ENSG00000138757	0.0582948	-0.573282	-0.967351	0.0266258
	DHX37	ENSG00000150990	-0.817523	-0.820917				RPS27	ENSG00000177954	-0.833526	-0.647249				PDCD4	ENSG00000150593	-1.93127	0.58029				RPS21	ENSG00000171858	-0.145716	-1.10074	-1.50385				AIMP2	ENSG00000106305	-0.771716	-0.907061	-0.8018				RNASE13	ENSG00000206150	0.056044	-0.5207	-0.22509	0.0131328
	TEFM	ENSG00000172171	-0.537538	-0.814706				EEF1E1	ENSG00000124802	-1.53386	-0.644591				PCBP4	ENSG00000090097	-1.88643	0.597542				TRMT2A	ENSG00000099899	-0.107378	-1.09786	-0.725042				RPP40	ENSG00000124787	-0.693185	-0.90522	-1.06551				SUGP2	ENSG00000064607	0.0374013	-1.35346	-0.73437	0.873934
	FASTKD1	ENSG00000138399	-0.679858	-0.813304				PUS7	ENSG00000091127	-1.21642	-0.643981				TDRKH	ENSG00000182134	-1.87345	0.963843				PRPF6	ENSG00000101161	-0.292629	-1.08836	-0.810319				DCAF13	ENSG00000164934	-1.28379	-0.904657	-0.934205				HTATSF1	ENSG00000102241	0.00193112	-0.399242	1.46802	0.560847
	EFTUD2	ENSG00000108883	-0.55754	-0.806987				MARS	ENSG00000166986	-0.545646	-0.64324				ENOX1	ENSG00000120658	-1.80717	1.23964				EIF6	ENSG00000242372	-0.117712	-1.08542	-0.775202				HELZ2	ENSG00000130589	-1.19779	-0.897569	-1.75308				CSTF2	ENSG00000101811	0	-1.39953	0	1.31414
	RPS2	ENSG00000140988	-0.809113	-0.803008				LARP1	ENSG00000155506	-0.590004	-0.641873				PSIP1	ENSG00000164985	-1.80549	0.477953				AEN	ENSG00000181026	-0.693335	-1.08335	-1.39088				RRP9	ENSG00000114767	-0.583895	-0.896387	-0.395672				UBAP2L	ENSG00000143569	0	-0.689818	0.314885	-2.01032
	QTRT1	ENSG00000213339	-0.686362	-0.797734				UTP14A	ENSG00000156697	-1.10253	-0.640418				LARP6	ENSG00000166173	-1.79907	2.10788				RNASE10	ENSG00000182545	-1.64052	-1.07126	-0.700845				URB2	ENSG00000135763	-0.717725	-0.896378	-1.31384				HINT3	ENSG00000111911	0	-0.506243	0	0.483039
	RPL8	ENSG00000161016	-0.751138	-0.793792				EIF3E	ENSG00000104408	-0.329087	-0.635244				DZIP3	ENSG00000198919	-1.69874	1.72351				KIAA0020	ENSG00000080608	-0.803672	-1.07001	-1.13395				MOV10	ENSG00000155363	-0.742639	-0.89415	-1.33099				YBX3	ENSG00000060138	-0.000672002	0.296834	0.121329	0.206796
	POLR2I	ENSG00000105258	-0.638783	-0.791392				R3HDM1	ENSG00000048991	-0.511879	-0.628833				RBM11	ENSG00000185272	-1.69771	3.52961				RPP40	ENSG00000124787	-0.671468	-1.0669	-1.32926				THOC6	ENSG00000131652	-1.13342	-0.894061	-1.00466				ZC3H6	ENSG00000188177	-0.0022223	0.391127	-0.509839	-0.612257
	EEF1E1	ENSG00000124802	-0.813188	-0.789494				SNRPA1	ENSG00000131876	-0.413853	-0.627533				PTGES3L-AARSD1	ENSG00000108825	-1.60304	1.89799				TSEN54	ENSG00000182173	-0.467731	-1.06409	-0.668961				MRPL19	ENSG00000115364	-0.412698	-0.889582	-0.797478				LSM12	ENSG00000161654	-0.00278967	-0.718004	-0.455981	0.630459
	GNL3	ENSG00000163938	-1.12601	-0.789099				TRMT61A	ENSG00000166166	-0.294154	-0.622683				ADARB2	ENSG00000185736	-1.57097	4.08031				TUT1	ENSG00000149016	-0.369759	-1.06137	-0.650125				TDRD9	ENSG00000156414	-0.415408	-0.888997	-4.06141				FAM46A	ENSG00000112773	-0.0053589	0.695202	0.739278	0.291977
	NONO	ENSG00000147140	-0.668217	-0.788149				ZC3H8	ENSG00000144161	-0.608844	-0.622574				AFF3	ENSG00000144218	-1.5489	1.84982				SND1	ENSG00000197157	-0.147126	-1.05911	-0.968034				R3HDM1	ENSG00000048991	-0.483543	-0.888036	-1.05136				TRUB2	ENSG00000167112	-0.0137506	0.226537	-0.0898532	-0.246882
	CTU2	ENSG00000174177	-0.829748	-0.782992				PPIH	ENSG00000171960	-1.095	-0.622105				TNRC6C	ENSG00000078687	-1.50963	1.57199				DUS1L	ENSG00000169718	-0.233209	-1.05893	-0.857258				SMG5	ENSG00000198952	-0.777715	-0.88712	-0.848974				SMAD7	ENSG00000101665	-0.0222326	-0.325845	-0.657649	0.0941555
	HNRNPAB	ENSG00000197451	-0.723282	-0.777978				TRMT6	ENSG00000089195	-1.00653	-0.619345				ADARB1	ENSG00000197381	-1.48586	2.58582				CARS2	ENSG00000134905	-0.145376	-1.05607	-0.990937				PNLDC1	ENSG00000146453	-1.17046	-0.88318	-3.38167				INTS12	ENSG00000138785	-0.0305306	0.638775	0.238702	-0.173014
	EIF2AK1	ENSG00000086232	-1.02452	-0.771911				DHX37	ENSG00000150990	-0.892745	-0.619203				NXF5	ENSG00000126952	-1.43372	0.655153				POLRMT	ENSG00000099821	-0.307812	-1.05351	-0.493574				FBXO17	ENSG00000104835	-0.393329	-0.881024	-1.10011				TDRD10	ENSG00000163239	-0.0318875	0.284548	-0.62942	-0.0298699
	SLIRP	ENSG00000119705	-0.593812	-0.770149				IPO4	ENSG00000196497	-0.723436	-0.615183				ZC3H8	ENSG00000144161	-1.42853	1.00896				TBL3	ENSG00000183751	-0.025345	-1.05074	-0.746489				CPSF1	ENSG00000071894	-0.830481	-0.88038	-0.880192				URB1	ENSG00000142207	-0.0387879	-0.632182	-0.944738	0.0400594
	NAA38	ENSG00000128534	-0.695878	-0.768507				RPL17	ENSG00000265681	-0.679	-0.613299				EIF4E3	ENSG00000163412	-1.42471	1.80503				TDRD1	ENSG00000095627	-1.40928	-1.04934	-0.540251				VARS2	ENSG00000137411	-0.788428	-0.877772	-1.29068				WDR3	ENSG00000065183	-0.0489635	-0.014018	0.0723146	-0.381558
	ILF3	ENSG00000129351	-0.408448	-0.763023				IGHMBP2	ENSG00000132740	-0.361354	-0.611009				TARBP1	ENSG00000059588	-1.37577	0.946896				ZNF473	ENSG00000142528	-0.807261	-1.04881	-1.00022				MRPL37	ENSG00000116221	-0.561311	-0.877258	-0.994662				LSM1	ENSG00000175324	-0.0560556	-0.00315179	0.0708612	0.0429745
	NXT1	ENSG00000132661	-0.438701	-0.76071				GEMIN7	ENSG00000142252	-0.0986394	-0.609872				TDRD9	ENSG00000156414	-1.34017	2.432				DDX55	ENSG00000111364	-0.787915	-1.04625	-1.08033				EXOSC5	ENSG00000077348	-0.872475	-0.875398	-1.41413				RPS13	ENSG00000110700	-0.0585548	-0.607211	-0.402436	0.303279
	DDX27	ENSG00000124228	-0.721685	-0.753935				IARS	ENSG00000196305	-0.792378	-0.609209				RBFOX2	ENSG00000100320	-1.19618	1.63846				TRMT61A	ENSG00000166166	-0.183417	-1.04497	-0.853119				SRA1	ENSG00000213523	-0.568357	-0.874152	-0.530252				QTRTD1	ENSG00000151576	-0.0631917	0.366306	0.727347	0.904949
	EPRS	ENSG00000136628	-0.91685	-0.752735				LSM7	ENSG00000130332	-0.673868	-0.604201				MYEF2	ENSG00000104177	-1.19074	0.318406				RCL1	ENSG00000120158	-0.485774	-1.03948	-1.01378				HRSP12	ENSG00000132541	-0.257059	-0.873164	-1.01112				DDX10	ENSG00000178105	-0.0663438	0.0259214	-0.407232	-0.341517
	POLR2G	ENSG00000168002	-0.472702	-0.748177				UBAP2	ENSG00000137073	-0.917629	-0.604035				DYNC1H1	ENSG00000197102	-1.17468	1.93995				PPAN	ENSG00000130810	-0.642074	-1.03589	-0.867103				TARBP1	ENSG00000059588	-0.726568	-0.86828	-2.01491				ZCCHC2	ENSG00000141664	-0.0735343	0.205537	-0.479727	-0.849075
	TRPT1	ENSG00000149743	-0.957872	-0.746104				MSI2	ENSG00000153944	-1.69739	-0.60258				PIWIL1	ENSG00000125207	-1.13813	0				NOP16	ENSG00000048162	-0.506302	-1.0331	-1.15081				CALR3	ENSG00000269058	-1.18918	-0.868096	-3.19901				SMAD5	ENSG00000113658	-0.077403	0.00144567	-0.0411421	0.78503
	APOBEC3F	ENSG00000128394	-0.44252	-0.742782				POLR2G	ENSG00000168002	-0.524944	-0.602121				PNLDC1	ENSG00000146453	-1.11981	3.08079				PRKDC	ENSG00000253729	-1.08317	-1.03047	-1.14732				NOC4L	ENSG00000184967	-0.792762	-0.864936	-0.86541				ELAC1	ENSG00000141642	-0.0796608	-1.40209	-0.717376	0.298332
	NOL6	ENSG00000165271	-0.750661	-0.740098				GARS	ENSG00000106105	-0.88385	-0.600122				CPEB3	ENSG00000107864	-1.10916	3.90312				NOP58	ENSG00000055044	-0.928521	-1.02336	-1.25182				WRAP53	ENSG00000141499	-0.48398	-0.861291	-1.14145				EEFSEC	ENSG00000132394	-0.0807306	1.12188	0	0
	CPSF1	ENSG00000071894	-0.944799	-0.737876				RRP1	ENSG00000160214	-0.220921	-0.599288				GARS	ENSG00000106105	-1.10019	0.0966384				MRPS12	ENSG00000128626	-0.152699	-1.02209	-0.849704				RPL26L1	ENSG00000037241	-1.03861	-0.85856	-0.740297				RPS3A	ENSG00000145425	-0.0864758	-0.460454	-0.160025	0.0739218
	EEF1G	ENSG00000254772	-0.644116	-0.735311				INTS7	ENSG00000143493	-0.392501	-0.598415				AGO2	ENSG00000123908	-1.06696	0.212617				CPSF4	ENSG00000160917	-0.41874	-1.01936	-0.900246				SNRPC	ENSG00000124562	-0.878625	-0.847929	-0.65615				RPS23	ENSG00000186468	-0.0894527	-0.0622047	0.220228	0.110678
	ARL6IP4	ENSG00000182196	-0.487848	-0.733905				NAA38	ENSG00000128534	-0.703625	-0.597526				SNRPN	ENSG00000128739	-1.05613	1.61525				TRMU	ENSG00000100416	-0.665145	-1.00813	-0.88785				EEF1E1	ENSG00000124802	-0.665169	-0.846684	-0.495325				RUVBL1	ENSG00000175792	-0.0919703	0.243558	-0.0508721	-0.310327
	ZNF239	ENSG00000196793	-1.69277	-0.73223				APOBEC3H	ENSG00000100298	-1.04611	-0.59668				APOBEC2	ENSG00000124701	-1.03135	0.701071				EXOSC2	ENSG00000130713	-0.525788	-1.00617	-1.12538				BYSL	ENSG00000112578	-1.02495	-0.832895	-0.622797				TNPO1	ENSG00000083312	-0.0932655	0.250598	-0.0521401	-0.415534
	ATXN2L	ENSG00000168488	-0.642211	-0.731375				GAPDH	ENSG00000111640	-0.572972	-0.595508				TARSL2	ENSG00000185418	-1.02507	2.08393				HEATR1	ENSG00000119285	-1.13446	-1.00406	-1.06444				C1QBP	ENSG00000108561	-0.533952	-0.825084	-0.690787				EIF4A2	ENSG00000156976	-0.0960636	0.105942	0.0754816	-0.059194
	MRPL17	ENSG00000158042	-0.849868	-0.724307				RUVBL1	ENSG00000175792	-0.946986	-0.595045				YBX2	ENSG00000006047	-1.00118	1.36194				URB1	ENSG00000142207	-0.48649	-0.994635	-1.0165				TARS	ENSG00000113407	-0.706516	-0.822555	-1.33532				PRPF4	ENSG00000136875	-0.0987935	0.200968	0.202351	0.484673
	KIAA0020	ENSG00000080608	-0.560687	-0.724161				CMSS1	ENSG00000184220	-0.285529	-0.594483				EIF5A2	ENSG00000163577	-0.986928	0.663283				ZC3H3	ENSG00000014164	-0.573782	-0.994433	-0.465403				SMG9	ENSG00000105771	-0.642167	-0.82195	-0.707384				LARP4B	ENSG00000107929	-0.103671	0.390188	0.318091	0.253956
	TRUB1	ENSG00000165832	-0.483884	-0.715395				GTPBP3	ENSG00000130299	-0.49611	-0.593868				LRRFIP1	ENSG00000124831	-0.982717	0.175286				LUC7L	ENSG00000007392	-0.187333	-0.994	-0.806345				EIF4G1	ENSG00000114867	-0.509078	-0.814726	-1.18281				UBAP2	ENSG00000137073	-0.108208	0.317947	-0.521124	-1.00754
	RPLP1	ENSG00000137818	-0.38758	-0.71069				EIF3B	ENSG00000106263	-0.36779	-0.592507				CPEB2	ENSG00000137449	-0.947846	1.41778				RP9	ENSG00000164610	-0.558635	-0.993837	-0.887594				GTPBP2	ENSG00000172432	-0.42922	-0.811561	-1.15628				PUS3	ENSG00000110060	-0.113111	-0.558109	-0.271194	0.441535
	ADAT3	ENSG00000213638	-0.21308	-0.710017				RPL27	ENSG00000131469	-0.460487	-0.591455				DICER1	ENSG00000100697	-0.924947	1.19382				ZC3H8	ENSG00000144161	-0.458645	-0.992202	-1.09205				POP1	ENSG00000104356	-1.11225	-0.811015	-1.5403				RBMX	ENSG00000147274	-0.123469	-0.342846	-0.206572	0.593112
	RPS5	ENSG00000083845	-0.525278	-0.709178				RPS16	ENSG00000105193	-0.617639	-0.590017				IFIT1B	ENSG00000204010	-0.913008	0.266165				NUTF2	ENSG00000102898	-0.282433	-0.986844	-1.05841				RPS2	ENSG00000140988	-0.463668	-0.810133	-0.174991				TDRD15	ENSG00000218819	-0.130134	0.16483	0.451574	-0.334625
	NPM1	ENSG00000181163	-0.680029	-0.705065				RBM34	ENSG00000188739	-1.1874	-0.589468				STRBP	ENSG00000165209	-0.898023	0.816915				BRCA1	ENSG00000012048	-1.35977	-0.982596	-1.24887				EFTUD2	ENSG00000108883	-0.485814	-0.810074	-1.12208				CLK4	ENSG00000113240	-0.137032	0.628095	0.432028	0.0127672
	SNRNP40	ENSG00000060688	-0.333158	-0.70417				RPS7	ENSG00000171863	-0.222403	-0.589022				RBMS3	ENSG00000144642	-0.888185	0.640151				MRPL17	ENSG00000158042	-0.42713	-0.982355	-1.2541				PEG10	ENSG00000242265	-0.941422	-0.80921	-1.28519				RAVER2	ENSG00000162437	-0.137346	0.142589	0.253686	0.496496
	EIF2S2	ENSG00000125977	-0.335335	-0.702184				DZIP3	ENSG00000198919	-0.789775	-0.5876				TNPO2	ENSG00000105576	-0.862704	1.00016				IARS	ENSG00000196305	-0.637311	-0.980375	-1.11222				NAA38	ENSG00000128534	-0.500791	-0.798359	-0.658756				TSEN54	ENSG00000182173	-0.137434	-0.530264	-0.0514343	0.408436
	ZNF768	ENSG00000169957	-0.612141	-0.701902				DZIP1L	ENSG00000158163	-1.99388	-0.585194				CCRN4L	ENSG00000151014	-0.831819	0.562881				MSI1	ENSG00000135097	-0.738852	-0.980015	-0.400294				POLR2G	ENSG00000168002	-0.647769	-0.797593	-0.328237				ERI2	ENSG00000196678	-0.142945	0.324544	-0.0867317	-0.186664
	SRPK2	ENSG00000135250	-0.380904	-0.7007				TSEN2	ENSG00000154743	-0.063519	-0.583831				RPP25	ENSG00000178718	-0.828961	1.76476				QTRT1	ENSG00000213339	-0.295314	-0.975377	-0.718832				EIF6	ENSG00000242372	-0.879751	-0.797582	-0.916229				PURA	ENSG00000185129	-0.143513	0.272044	-0.0289579	-0.583063
	UTP14A	ENSG00000156697	-0.811194	-0.697305				RPL39	ENSG00000198918	-0.506938	-0.58299				METTL10	ENSG00000203791	-0.823972	1.05727				MRPL4	ENSG00000105364	-0.110756	-0.970748	-0.783951				TFB2M	ENSG00000162851	-0.88357	-0.795094	-0.947937				RPS9	ENSG00000170889	-0.146059	-0.576901	-0.440799	0.53846
	NOL3	ENSG00000140939	-0.942992	-0.695131				MVP	ENSG00000013364	-1.8086	-0.582326				UPF3B	ENSG00000125351	-0.79738	0.0549832				RPL3L	ENSG00000140986	-0.52084	-0.967005	-0.580727				UBAP2	ENSG00000137073	-0.467367	-0.795075	-0.868417				ZCCHC9	ENSG00000131732	-0.150217	0.482627	-0.153638	-0.136607
	MRPS28	ENSG00000147586	-0.571571	-0.691802				POLR2J3	ENSG00000168255	-0.959919	-0.581459				CELF6	ENSG00000140488	-0.794811	2.44248				LONP1	ENSG00000196365	-0.214113	-0.963129	-0.876678				DHX37	ENSG00000150990	-0.606107	-0.792736	-0.801818				PHF5A	ENSG00000100410	-0.150299	0.02835	0.0633286	-0.395907
	EIF3CL	ENSG00000205609	-0.226969	-0.690932				DUS4L	ENSG00000105865	-0.320863	-0.580647				SRSF12	ENSG00000154548	-0.775665	0.788493				GNL3	ENSG00000163938	-0.63556	-0.96032	-1.12849				NSUN5	ENSG00000130305	-0.970992	-0.785929	-0.91222				RPL23	ENSG00000125691	-0.1556	0.0829753	0.148176	0.22527
	THOC6	ENSG00000131652	-0.505788	-0.689589				DROSHA	ENSG00000113360	-1.05144	-0.579337				CTIF	ENSG00000134030	-0.77138	2.32314				EXOSC7	ENSG00000075914	-0.0591946	-0.958646	-1.10934				NUDT16L1	ENSG00000168101	-1.36523	-0.784836	-0.146691				ELAC2	ENSG00000006744	-0.158553	-1.05412	-0.411322	1.63819
	AARS	ENSG00000090861	-0.59345	-0.687802				RBM28	ENSG00000106344	-0.46262	-0.579135				ESRP2	ENSG00000103067	-0.753521	0.485725				TARBP2	ENSG00000139546	-0.201369	-0.956659	-0.94407				REPIN1	ENSG00000214022	-0.677094	-0.784488	-0.345862				TRUB1	ENSG00000165832	-0.161025	0.231588	0.401013	-0.0709028
	RPL35	ENSG00000136942	-0.446752	-0.686949				RPL18A	ENSG00000105640	-0.921224	-0.57871				ZC3H6	ENSG00000188177	-0.72276	0.851115				NONO	ENSG00000147140	-0.396079	-0.954879	-0.884659				DHX34	ENSG00000134815	-0.853927	-0.784236	-0.832679				NSUN6	ENSG00000241058	-0.166012	0.1201	0.510416	1.14958
	HRSP12	ENSG00000132541	-0.702024	-0.68661				RBM44	ENSG00000177483	-0.709538	-0.576938				TDRD12	ENSG00000173809	-0.713964	0.988453				OAS2	ENSG00000111335	-1.03922	-0.943155	-0.866365				MRPL4	ENSG00000105364	-0.673676	-0.78018	-0.558973				MRPL30	ENSG00000185414	-0.169358	0.598648	0.237479	-0.55495
	GPATCH4	ENSG00000160818	-0.886331	-0.678263				RPL36	ENSG00000130255	-0.548418	-0.574307				R3HDM2	ENSG00000179912	-0.693014	1.23896				SNRPF	ENSG00000139343	-0.777252	-0.941433	-1.21106				RBM38	ENSG00000132819	-0.478755	-0.778594	-0.365742				DICER1	ENSG00000100697	-0.174144	-0.45226	-0.0121082	1.55306
	RPL26L1	ENSG00000037241	-0.591099	-0.676275				C2orf15	ENSG00000241962	-1.15034	-0.573406				RALYL	ENSG00000184672	-0.666413	3.56084				DUS4L	ENSG00000105865	-0.780103	-0.938538	-1.04374				GTF3A	ENSG00000122034	-0.453047	-0.777404	-0.790258				POLR1E	ENSG00000137054	-0.17515	0.273226	0.207232	-0.282135
	NOC4L	ENSG00000184967	-0.558966	-0.675642				ATXN2L	ENSG00000168488	-0.909597	-0.572584				ATXN1	ENSG00000124788	-0.665883	1.08475				CLK2	ENSG00000176444	-0.487521	-0.937004	-0.653192				MARS2	ENSG00000247626	-0.381786	-0.773503	-1.72555				POP5	ENSG00000167272	-0.177687	0.148466	-0.11903	0.849363
	MRPS23	ENSG00000181610	-0.783466	-0.674193				FTSJ3	ENSG00000108592	-0.626019	-0.572297				CIRBP	ENSG00000099622	-0.656799	0.600816				UPF3B	ENSG00000125351	-0.635802	-0.934708	-0.856199				RAN	ENSG00000132341	-0.749746	-0.756317	-1.02968				MRPS31	ENSG00000102738	-0.17908	-1.45256	-1.29238	0.374731
	ZC3H3	ENSG00000014164	-0.643213	-0.67083				SLBP	ENSG00000163950	-0.402576	-0.56898				TRMT6	ENSG00000089195	-0.642763	0.0976085				DDX51	ENSG00000185163	-0.226864	-0.933049	-0.886889				NXT2	ENSG00000101888	-0.211808	-0.750801	-1.85547			C6	ELAVL2	ENSG00000107105	-0.182302	0.675209	0.576891	1.00958	0.0097
	NCBP1	ENSG00000136937	-0.406004	-0.66674				CCDC86	ENSG00000110104	-0.762261	-0.568767				PTRH1	ENSG00000187024	-0.634404	1.91878				THOC6	ENSG00000131652	-0.425774	-0.931945	-0.714527				PTRH2	ENSG00000141378	-1.0763	-0.749206	-0.478583				IGF2BP3	ENSG00000136231	-0.185856	0.000280002	-0.105358	-0.372623
	VARS2	ENSG00000137411	-0.684161	-0.664496				HNRNPA1	ENSG00000135486	-1.12445	-0.568543				EIF4G3	ENSG00000075151	-0.632039	1.15646				FARSA	ENSG00000179115	-0.273156	-0.930377	-0.716979				TRUB2	ENSG00000167112	-0.590075	-0.746797	-0.87412				CELF5	ENSG00000161082	-0.186329	0.362563	0.237003	-0.507429
	CNP	ENSG00000173786	-0.797197	-0.664125				MIF4GD	ENSG00000125457	-0.962858	-0.568342				MECP2	ENSG00000169057	-0.63177	1.20111				NIFK	ENSG00000155438	-0.620131	-0.915703	-1.00493				MTIF2	ENSG00000085760	-0.264522	-0.741146	-1.22018				PATL2	ENSG00000229474	-0.190756	0.705255	0.10552	0.0358133
	HBS1L	ENSG00000112339	-0.0826757	-0.66232				CNOT6	ENSG00000113300	-1.21418	-0.561296				EIF4A2	ENSG00000156976	-0.600998	1.17362				EXOSC8	ENSG00000120699	-0.560755	-0.914748	-1.15369				RALY	ENSG00000125970	-0.77229	-0.736361	-0.65919				EEF1A2	ENSG00000101210	-0.202439	0.352401	0.238254	-0.13308
	EARS2	ENSG00000103356	-0.786324	-0.660298				ARHGEF28	ENSG00000214944	-0.446562	-0.556942				DROSHA	ENSG00000113360	-0.583628	0.314052				ZGPAT	ENSG00000197114	-0.0963337	-0.913952	-0.454527				UBAP2L	ENSG00000143569	-0.852575	-0.732729	-0.669869				NR0B1	ENSG00000169297	-0.205014	0.575282	0.881279	-0.0053259
	TRMT112	ENSG00000173113	-0.452513	-0.653732				CD2BP2	ENSG00000169217	-1.14872	-0.554129				CARS	ENSG00000110619	-0.573036	0.101847				RPS19	ENSG00000105372	-0.0662337	-0.91393	-0.845319				FASTK	ENSG00000164896	-0.736912	-0.726495	-0.33677				UTP20	ENSG00000120800	-0.221954	0.578459	0.564338	0.427129
	RAVER1	ENSG00000161847	-0.305722	-0.653349				DKC1	ENSG00000130826	-0.735311	-0.551285				ZMAT3	ENSG00000172667	-0.570513	0.153554				DNMT1	ENSG00000130816	-1.09567	-0.904143	-0.919111				TBL3	ENSG00000183751	-0.848041	-0.721016	-0.359495				ZFR2	ENSG00000105278	-0.224675	-0.0476821	0.0823661	0.00421347
	LONP1	ENSG00000196365	-0.52252	-0.653056				TRNAU1AP	ENSG00000180098	-0.257651	-0.549672				PRPF40B	ENSG00000110844	-0.56901	0.987638				YARS	ENSG00000134684	-0.230294	-0.903064	-0.912777				MRPL51	ENSG00000111639	-0.794052	-0.716848	-0.833045				RNASEK	ENSG00000219200	-0.229544	-0.324338	-0.239791	0.0146868
	RPL36	ENSG00000130255	-0.519574	-0.65265				XPOT	ENSG00000184575	-0.586381	-0.546127				KIAA0430	ENSG00000166783	-0.560044	1.20767				AARS	ENSG00000090861	-0.239589	-0.89945	-0.785028				SNRPD2	ENSG00000125743	-0.59744	-0.705892	-0.284058				ELAVL4	ENSG00000162374	-0.241513	0.0672587	-0.202302	-0.856653
	RPL39	ENSG00000198918	-0.662806	-0.650623				CNOT11	ENSG00000158435	-0.516963	-0.543163				ZNF239	ENSG00000196793	-0.548661	0.167426				PES1	ENSG00000100029	-0.41902	-0.898675	-0.873151				MAZ	ENSG00000103495	-1.31426	-0.705685	-0.80266				LONP1	ENSG00000196365	-0.243515	0.194146	0.189268	-0.560876
	MRPL55	ENSG00000162910	-0.802696	-0.648549				FARSB	ENSG00000116120	-0.470024	-0.54211				R3HDM1	ENSG00000048991	-0.546747	1.8846				GTPBP4	ENSG00000107937	-1.01791	-0.896466	-1.12079				TSFM	ENSG00000123297	-0.683963	-0.70415	-0.757674				RPS2	ENSG00000140988	-0.244164	-0.0951537	0.0674187	0.592893
	POLRMT	ENSG00000099821	-0.302917	-0.645173				RPLP0	ENSG00000089157	-0.810243	-0.540691				EPRS	ENSG00000136628	-0.543781	0.0635652				SMG9	ENSG00000105771	-0.511393	-0.895926	-0.604461				NOL3	ENSG00000140939	-0.363872	-0.699928	-0.95613				XPOT	ENSG00000184575	-0.24666	-0.368353	-0.236804	0.506399
	NOLC1	ENSG00000166197	-0.628266	-0.643677				HENMT1	ENSG00000162639	-1.503	-0.534095				SCAF1	ENSG00000126461	-0.541413	1.12976				REPIN1	ENSG00000214022	-0.509486	-0.892308	-0.47543				MRPL24	ENSG00000143314	-1.10978	-0.697888	-0.279379				CELF4	ENSG00000101489	-0.249028	0.157911	0.00972285	-0.27228
	EIF3M	ENSG00000149100	-0.306962	-0.643025				EIF3CL	ENSG00000205609	-0.124972	-0.531445				PSTK	ENSG00000179988	-0.537193	0.985567				MRPS26	ENSG00000125901	-0.228793	-0.89067	-0.912413				RRBP1	ENSG00000125844	-0.707916	-0.691968	-0.424399				RP9	ENSG00000164610	-0.250477	-0.048325	0.147077	0.945867
	PTBP1	ENSG00000011304	-0.420702	-0.641437				DYNC1H1	ENSG00000197102	-0.889913	-0.529249				NPM2	ENSG00000158806	-0.51874	4.23221				EXOSC3	ENSG00000107371	-0.279137	-0.890335	-0.895539				GTPBP3	ENSG00000130299	-0.950203	-0.690228	-1.19729				GARS	ENSG00000106105	-0.250864	-0.41015	0.149917	-0.980172
	NOC3L	ENSG00000173145	-0.50521	-0.640505				WDR5	ENSG00000196363	-0.13438	-0.52803				TSR2	ENSG00000158526	-0.498696	1.20857				WDR12	ENSG00000138442	-0.683347	-0.890051	-1.04998				WDR12	ENSG00000138442	-0.365396	-0.684474	-0.804721				ZNF598	ENSG00000167962	-0.255104	-0.904168	-0.903455	0.230652
	MRPS15	ENSG00000116898	-0.719828	-0.638348				PIWIL4	ENSG00000134627	-3.16269	-0.526182				CELF2	ENSG00000048740	-0.497064	1.69315				NOLC1	ENSG00000166197	-0.855364	-0.887765	-1.09159				EIF2B5	ENSG00000145191	-0.464499	-0.683023	-1.09019				CARS	ENSG00000110619	-0.260824	-0.202095	-0.416464	0.117326
	RIOK3	ENSG00000101782	-0.147436	-0.63786				RBM19	ENSG00000122965	-0.163071	-0.52225				PRPF6	ENSG00000101161	-0.491287	0.343365				WDR43	ENSG00000163811	-0.875443	-0.885776	-1.21646				ATXN2L	ENSG00000168488	-0.610056	-0.674952	-0.947803				ATXN2L	ENSG00000168488	-0.260891	0.501984	0.185317	-0.248915
	ENOX2	ENSG00000165675	-0.270824	-0.637754				RAN	ENSG00000132341	-0.927327	-0.519307				UHMK1	ENSG00000152332	-0.491279	1.1817				DDX21	ENSG00000165732	-1.06608	-0.88461	-1.18289				PABPC3	ENSG00000151846	-0.348381	-0.673717	-1.0328				TNPO2	ENSG00000105576	-0.261093	0.162455	-1.00941	0.654986
	SMAD3	ENSG00000166949	-0.0865239	-0.636622				METTL1	ENSG00000037897	-0.810414	-0.518771				PARP1	ENSG00000143799	-0.47651	0.0359876				WDR5	ENSG00000196363	-0.538135	-0.883696	-0.717408				MRP63	ENSG00000173141	-0.524329	-0.673524	-0.0995462				FASTK	ENSG00000164896	-0.268355	0.407233	0.167219	-0.191863
	SERBP1	ENSG00000142864	-0.287736	-0.624462				RUVBL2	ENSG00000183207	-0.212697	-0.51779				L1TD1	ENSG00000240563	-0.470611	1.10955				TARS2	ENSG00000143374	-0.439113	-0.872741	-0.562312				AEN	ENSG00000181026	-0.458081	-0.668273	-0.721424				CTU1	ENSG00000142544	-0.271397	-0.101634	-0.125165	0.0506025
	IPO13	ENSG00000117408	-0.230855	-0.624321				BYSL	ENSG00000112578	-0.982226	-0.51294				FARSB	ENSG00000116120	-0.46799	0.0806658				NOM1	ENSG00000146909	-0.553429	-0.868964	-0.90268				MRPL3	ENSG00000114686	-0.721899	-0.666937	-1.06059				R3HCC1L	ENSG00000166024	-0.271686	-0.0254603	-1.07483	0.416105
	TFB1M	ENSG00000029639	-0.459112	-0.622649				RAE1	ENSG00000101146	-0.740268	-0.511563				SRPK2	ENSG00000135250	-0.452927	1.22698				ATXN2L	ENSG00000168488	-0.522068	-0.86757	-0.500199				TRMT2A	ENSG00000099899	-0.45381	-0.663801	-0.56976				ZNF385A	ENSG00000161642	-0.271797	0.252236	-0.0269882	-0.432145
	TNPO2	ENSG00000105576	-0.0583333	-0.619459				THOC3	ENSG00000051596	-0.0413873	-0.511149				TXNL4A	ENSG00000141759	-0.451258	0.201009				POP7	ENSG00000172336	-0.163228	-0.861058	-0.794572				MRPL21	ENSG00000197345	-0.76879	-0.657999	-0.124627				TARS	ENSG00000113407	-0.273445	-1.47472	-1.26123	0.444324
	RPS16	ENSG00000105193	-0.629736	-0.619214				MRPL21	ENSG00000197345	-0.403624	-0.510209				G3BP2	ENSG00000138757	-0.444496	1.50942				INTS7	ENSG00000143493	-0.747165	-0.858975	-0.839022				CARS	ENSG00000110619	-0.386143	-0.656344	-0.404731				TDRD6	ENSG00000180113	-0.278559	0.277406	0.684176	1.00246
	AGO2	ENSG00000123908	-0.224672	-0.618019				NOP2	ENSG00000111641	-0.772348	-0.508761				SMG1	ENSG00000157106	-0.437237	1.04861				ANGEL1	ENSG00000013523	-0.277863	-0.854544	-0.665822				ZNF579	ENSG00000218891	-1.00187	-0.655952	-0.157117				GAPDH	ENSG00000111640	-0.281083	-0.658687	-0.473792	0.323071
	POP5	ENSG00000167272	-0.495862	-0.616271				TNPO2	ENSG00000105576	-0.721784	-0.507551				ZCCHC2	ENSG00000141664	-0.415551	1.36782				MARS	ENSG00000166986	-0.161569	-0.850915	-0.80598				GTPBP4	ENSG00000107937	-0.707331	-0.655172	-0.643147				RALY	ENSG00000125970	-0.281752	0.257406	-0.100022	-0.492815
	RPS21	ENSG00000171858	-0.638837	-0.613428				RPL35A	ENSG00000182899	-0.679626	-0.506131				NKRF	ENSG00000186416	-0.409976	1.49242				EEFSEC	ENSG00000132394	-0.0105526	-0.850747	-0.603553				LARP4B	ENSG00000107929	-0.563605	-0.655014	-0.778818				EZH2	ENSG00000106462	-0.281972	-0.169236	-0.258	0.663393
	RPL18A	ENSG00000105640	-0.443331	-0.612887				CPSF3	ENSG00000119203	-0.284656	-0.504658				ENDOU	ENSG00000111405	-0.405696	1.51782				WDR3	ENSG00000065183	-0.676316	-0.844574	-0.944794				QTRT1	ENSG00000213339	-0.538284	-0.652569	-0.393203				ZNF768	ENSG00000169957	-0.285704	0.0452903	-0.18979	-0.444419
	CLASRP	ENSG00000104859	-0.58266	-0.60835				EFTUD2	ENSG00000108883	-0.618143	-0.503223				NOLC1	ENSG00000166197	-0.394657	1.06394				THOC3	ENSG00000051596	-0.176423	-0.839537	-0.885381				EIF3I	ENSG00000084623	-0.291651	-0.646117	-0.23768				REXO1	ENSG00000079313	-0.288256	0.224137	-0.330633	0.943327
	IGHMBP2	ENSG00000132740	-0.420755	-0.603795				RPS28	ENSG00000233927	-0.221621	-0.499922				CPSF1	ENSG00000071894	-0.381773	0.0473411				BRIX1	ENSG00000113460	-1.06603	-0.835751	-1.24306				POLR2J3	ENSG00000168255	-0.428123	-0.642607	-0.484239				TRMT61A	ENSG00000166166	-0.288531	0.51582	0.635059	1.59512
	UNKL	ENSG00000059145	-0.402199	-0.596389				PRPF6	ENSG00000101161	-0.35957	-0.496083				ATXN2L	ENSG00000168488	-0.373021	0.104629				NOC3L	ENSG00000173145	-0.726829	-0.833961	-1.1284				SF3B4	ENSG00000143368	-1.0251	-0.636906	-0.593677				TRMT1	ENSG00000104907	-0.292725	0.185215	-0.47879	-0.240381
	FTSJ3	ENSG00000108592	-0.543659	-0.595616				PTBP2	ENSG00000117569	-0.692205	-0.492499				SMAD7	ENSG00000101665	-0.366699	1.68743				XPO4	ENSG00000132953	-0.742567	-0.823221	-1.0132				TCOF1	ENSG00000070814	-0.573592	-0.628383	-1.15772				PPAN	ENSG00000130810	-0.297994	0.298559	-0.134306	-0.713056
	UBAP2	ENSG00000137073	-0.103145	-0.591587				RPS3	ENSG00000149273	-1.07816	-0.492346				XPO4	ENSG00000132953	-0.358245	0.284588				RNASE7	ENSG00000165799	-4.6	-0.822511	-1.40174				NSUN4	ENSG00000117481	-0.144491	-0.628357	-0.45283				TXNL4A	ENSG00000141759	-0.300804	-0.642372	-1.58496	1.55857
	TSEN34	ENSG00000170892	-0.517401	-0.582311				RPS2	ENSG00000140988	-1.04348	-0.488414				TCOF1	ENSG00000070814	-0.355825	0.560349				UBAP2	ENSG00000137073	-0.609027	-0.820673	-0.592814				DDX56	ENSG00000136271	-0.65477	-0.628135	-0.553348				TBRG4	ENSG00000136270	-0.306789	-0.159258	0.069731	0.237563
	RPL38	ENSG00000172809	-0.547383	-0.575705				ZMAT5	ENSG00000100319	-0.269577	-0.488359				CLASRP	ENSG00000104859	-0.349036	0.461249				DDX10	ENSG00000178105	-0.716442	-0.820162	-1.06819				MRPS25	ENSG00000131368	-0.0664596	-0.627221	-0.67175				POLR2J	ENSG00000005075	-0.315132	0.184681	0.195594	-1.03775
	UBAP2L	ENSG00000143569	-0.620125	-0.570727				RPL23	ENSG00000125691	-0.708217	-0.487915				ZCCHC14	ENSG00000140948	-0.347991	0.564054				PRPF4	ENSG00000136875	-0.577103	-0.816191	-0.853082				DDX4	ENSG00000152670	-0.586837	-0.625236	-2.22557				TNRC6A	ENSG00000090905	-0.317024	0.233441	-0.299103	-0.329231
	QTRTD1	ENSG00000151576	-0.123608	-0.56639				PTRH2	ENSG00000141378	-0.104887	-0.48763				HENMT1	ENSG00000162639	-0.331472	2.23843				MRTO4	ENSG00000053372	-0.708372	-0.814259	-1.01429				ERI1	ENSG00000104626	-0.163543	-0.624482	-0.886214				SMG9	ENSG00000105771	-0.32118	0.0359425	0.0763013	-0.217464
	EIF3I	ENSG00000084623	-0.607237	-0.565541				ZC3H12D	ENSG00000178199	-0.870045	-0.486846				LSM11	ENSG00000155858	-0.324143	2.03328				RALY	ENSG00000125970	-0.0963091	-0.810551	-0.315153				MAGOHB	ENSG00000111196	-0.888732	-0.61975	-0.920367				RPL6	ENSG00000089009	-0.32224	0.00643559	0.20965	0.626925
	CALR	ENSG00000179218	-0.710587	-0.55764				RP9	ENSG00000164610	-0.500445	-0.485377				SIDT2	ENSG00000149577	-0.316123	0.69935				IPO5	ENSG00000065150	-0.290231	-0.810201	-1.05671				AC004381.6	ENSG00000005189	-0.703917	-0.618202	-1.27462				RPS15	ENSG00000115268	-0.330978	0.274135	0.0104447	-0.443728
	LAS1L	ENSG00000001497	-0.400621	-0.556292				DDX55	ENSG00000111364	-0.36934	-0.481273				NOL3	ENSG00000140939	-0.316009	0.040131				TTF2	ENSG00000116830	-0.919278	-0.806232	-0.78764				GPATCH4	ENSG00000160818	-0.844202	-0.61707	-0.445931				SNRPB	ENSG00000125835	-0.333366	-0.0656945	-0.115223	0.103049
	DCPS	ENSG00000110063	-0.727409	-0.554496				NUTF2	ENSG00000102898	-0.768287	-0.478557				ZC3H13	ENSG00000123200	-0.314947	1.17418				GPATCH4	ENSG00000160818	-0.936034	-0.803102	-0.893103				SNRPE	ENSG00000182004	-1.19058	-0.614783	-0.553226				RNASE2	ENSG00000169385	-0.336658	0.673003	0.171106	-0.308998
	RRP9	ENSG00000114767	-0.457133	-0.55314				ASH1L	ENSG00000116539	-1.03915	-0.478296				LARP1	ENSG00000155506	-0.307186	1.25777				PIWIL4	ENSG00000134627	-1.09467	-0.801173	-0.732965				EIF2S2	ENSG00000125977	-0.556807	-0.611401	-0.706983				CTU2	ENSG00000174177	-0.338768	0.0786984	-0.0252532	-0.568951
	NUTF2	ENSG00000102898	-0.402532	-0.546453				RPS27A	ENSG00000143947	-0.685997	-0.476851				IPO13	ENSG00000117408	-0.300841	1.47174				UBAP2L	ENSG00000143569	-0.448305	-0.790563	-0.643845				DKC1	ENSG00000130826	-0.755881	-0.609595	-1.24284				SRRM4	ENSG00000139767	-0.345748	0.483947	0.017663	0.102981
	CARS	ENSG00000110619	-0.51995	-0.543462				RPL13A	ENSG00000142541	-0.730573	-0.476838				SMAD3	ENSG00000166949	-0.299402	0.717049				DDX49	ENSG00000105671	-0.195325	-0.788745	-0.513291				FASTKD5	ENSG00000215251	-0.235948	-0.608848	-0.497279				SLIRP	ENSG00000119705	-0.345776	-0.590692	-0.506891	0.129929
	RP9	ENSG00000164610	-0.458254	-0.540558				RPS12	ENSG00000112306	-0.4939	-0.472353				RPP14	ENSG00000163684	-0.28333	0.497389				PAN2	ENSG00000135473	-0.273561	-0.787569	-0.633797				MRPL36	ENSG00000171421	-0.799555	-0.607771	-0.888694				RRS1	ENSG00000179041	-0.346605	0.393735	0.105595	-0.302117
	SUGP2	ENSG00000064607	-0.28001	-0.53623				CDK5RAP1	ENSG00000101391	-0.108377	-0.469707				SUGP2	ENSG00000064607	-0.272735	1.10681				EFTUD2	ENSG00000108883	-0.674487	-0.787159	-0.648311				MRTO4	ENSG00000053372	-0.513243	-0.603941	-0.729862				TCOF1	ENSG00000070814	-0.347235	0.553448	-0.113253	0.110741
	NUFIP1	ENSG00000083635	-0.337753	-0.535485				LUC7L	ENSG00000007392	-0.976938	-0.46868				ASH1L	ENSG00000116539	-0.256536	1.32711				PNO1	ENSG00000115946	-0.688986	-0.783718	-1.06711				PRPF4	ENSG00000136875	-0.553095	-0.602455	-0.845915				TRMU	ENSG00000100416	-0.352155	1.11134	0.703259	-0.158236
	CDK5RAP1	ENSG00000101391	-0.641683	-0.534826				POLR2H	ENSG00000163882	-0.570433	-0.468641				RANBP17	ENSG00000204764	-0.242196	1.6359				PTRH2	ENSG00000141378	-0.654788	-0.775086	-0.929394				POLRMT	ENSG00000099821	-0.542205	-0.596649	-0.186447				TLR7	ENSG00000196664	-0.360968	0.022984	-0.280063	-0.798837
	ADAT2	ENSG00000189007	-0.377568	-0.532062				THOC6	ENSG00000131652	-0.770531	-0.468592				SMG6	ENSG00000070366	-0.234842	0.604554				PNPT1	ENSG00000138035	-1.00159	-0.774058	-1.04268				NOP58	ENSG00000055044	-0.655784	-0.592487	-0.651002				RPUSD1	ENSG00000007376	-0.365327	-0.452562	-0.147615	0.285295
	ZFR2	ENSG00000105278	-1.95567	-0.531873				NOVA2	ENSG00000104967	-0.150645	-0.468109				CDK5RAP1	ENSG00000101391	-0.232062	0.0218796				INTS8	ENSG00000164941	-0.876759	-0.768481	-0.790315				XPOT	ENSG00000184575	-0.5574	-0.590021	-1.25219				RPL8	ENSG00000161016	-0.365402	0.582675	0.443758	0.738398
	RPL18	ENSG00000063177	-0.378606	-0.531657				MEX3D	ENSG00000181588	-1.00678	-0.467232				MTG1	ENSG00000254536	-0.215595	1.51868				NXF3	ENSG00000147206	-2.82576	-0.765676	-2.91424				NOL10	ENSG00000115761	-0.461766	-0.588412	-0.819452				LAS1L	ENSG00000001497	-0.365955	-0.527844	-0.442283	0.201793
	ZC3HC1	ENSG00000091732	-0.553532	-0.529833				RBMX	ENSG00000147274	-0.762379	-0.467207				ENOX2	ENSG00000165675	-0.2082	0.223275				ALYREF	ENSG00000183684	-0.371647	-0.764232	-0.931509				MRPL39	ENSG00000154719	-0.14472	-0.583446	-0.646925				DUS4L	ENSG00000105865	-0.377084	2.29773	0.751486	0.993978
	RPL24	ENSG00000114391	-0.377745	-0.524055				GTPBP4	ENSG00000107937	-0.672	-0.464831				PURA	ENSG00000185129	-0.205089	1.30929				RBM19	ENSG00000122965	-0.43773	-0.760453	-0.683874				PRKDC	ENSG00000253729	-0.80618	-0.581525	-1.33554				NAT10	ENSG00000135372	-0.379162	-0.870175	-0.33133	0.0132868
	MOV10	ENSG00000155363	-0.72194	-0.520145				AFF3	ENSG00000144218	-0.703914	-0.462344				UPF2	ENSG00000151461	-0.197991	1.33867				TRMT6	ENSG00000089195	-1.03629	-0.759454	-1.04536				EIF4A3	ENSG00000141543	-0.897042	-0.578882	-0.671769				YARS2	ENSG00000139131	-0.379694	0.569402	0.188261	-0.510609
	YARS	ENSG00000134684	-0.640173	-0.51809				SARNP	ENSG00000205323	-0.585121	-0.462001				LAS1L	ENSG00000001497	-0.179975	0.0688794				UTP20	ENSG00000120800	-0.896547	-0.753529	-0.945183				LSM5	ENSG00000106355	-0.52825	-0.578054	-0.656236				TBL3	ENSG00000183751	-0.379769	0.2242	-0.254382	-0.301539
	ZGPAT	ENSG00000197114	-0.719696	-0.516919				U2SURP	ENSG00000163714	-0.463216	-0.453963				CNP	ENSG00000173786	-0.178873	2.59625				ILF3	ENSG00000129351	-0.469096	-0.751381	-0.642087				PTBP1	ENSG00000011304	-0.703443	-0.57799	-0.827082				RRBP1	ENSG00000125844	-0.380795	-0.991729	-0.450797	0.287419
	RBM34	ENSG00000188739	-0.4464	-0.51641				RPL18	ENSG00000063177	-0.445657	-0.450917				BOP1	ENSG00000261236	-0.17579	0.0767051				RAN	ENSG00000132341	-0.462644	-0.748771	-1.0864				PUS7	ENSG00000091127	-0.64148	-0.577149	-1.17428				RPL28	ENSG00000108107	-0.382147	-1.02112	-0.501105	0.363821
	PTBP3	ENSG00000119314	-0.432889	-0.512224				IPO13	ENSG00000117408	-0.24431	-0.448942				C2orf15	ENSG00000241962	-0.161863	0.0440116				MRPL36	ENSG00000171421	-0.115715	-0.747567	-0.850794				USP39	ENSG00000168883	-0.562082	-0.576594	-0.644518				NOP16	ENSG00000048162	-0.384452	0.0276253	-0.316139	-0.418367
	MEX3C	ENSG00000176624	-0.175118	-0.511265				RIOK1	ENSG00000124784	-0.439917	-0.448248				R3HCC1L	ENSG00000166024	-0.154288	0.443056				EIF3CL	ENSG00000205609	-0.312172	-0.747521	-0.107269				CPSF4L	ENSG00000187959	-0.392914	-0.574756	-1.51923				RPL36	ENSG00000130255	-0.385339	-1.25165	0.680209	-2.57332
	SMAD1	ENSG00000170365	-0.450285	-0.511078				RPS15	ENSG00000115268	-0.588898	-0.448033				DDX24	ENSG00000089737	-0.151871	1.54162				MRPS23	ENSG00000181610	-0.259398	-0.74337	-1.06236				SLBP	ENSG00000163950	-0.666276	-0.574061	-1.10682				BOP1	ENSG00000261236	-0.38657	0.141837	0.195512	0.00697598
	TRMT61A	ENSG00000166166	-0.434056	-0.510958				LAS1L	ENSG00000001497	-0.0250824	-0.447069				MRPS25	ENSG00000131368	-0.130483	0.651402				TRMT112	ENSG00000173113	-0.0352306	-0.740464	-1.01314				PNO1	ENSG00000115946	-0.557228	-0.573797	-0.515648				RBM19	ENSG00000122965	-0.3869	-0.153299	0.12379	0.003532
	ZNF579	ENSG00000218891	-0.285008	-0.507748				USP39	ENSG00000168883	-0.463377	-0.4463				IPO5	ENSG00000065150	-0.124559	0.0761311				FBXO17	ENSG00000104835	-0.418904	-0.736577	-0.603495				SF3B14	ENSG00000115128	-0.544949	-0.573187	-0.397857				DDX60L	ENSG00000181381	-0.405399	-0.565505	-0.27398	0.528666
	RPS27A	ENSG00000143947	-0.238156	-0.505811				RPL27A	ENSG00000166441	-0.30169	-0.444064				IFIT5	ENSG00000152778	-0.114954	0.205758				MARS2	ENSG00000247626	-0.686808	-0.736485	-0.655219				EIF3B	ENSG00000106263	-0.473071	-0.572212	-0.484402				RPSA	ENSG00000168028	-0.407309	-0.827494	-0.507966	0.216794
	EEFSEC	ENSG00000132394	-0.0171636	-0.50135				DDX51	ENSG00000185163	-0.319026	-0.441342				GFM2	ENSG00000164347	-0.106875	0.674926				CSTF2	ENSG00000101811	-0.442161	-0.731602	-0.485855				RPS28	ENSG00000233927	-0.237798	-0.571431	-0.0898053				YARS	ENSG00000134684	-0.419366	0.51697	-0.0209624	-0.130373
	RPS10	ENSG00000124614	-0.433369	-0.498051				SCAF1	ENSG00000126461	-0.317362	-0.438608				EEF1E1	ENSG00000124802	-0.100842	0.386474				MTRF1	ENSG00000120662	-0.513351	-0.721307	-0.656093				GNL3	ENSG00000163938	-0.37788	-0.570258	-0.660651				POP7	ENSG00000172336	-0.420381	0.640081	0.602844	-0.86412
	RPL7	ENSG00000147604	-0.452789	-0.480843				MRPL33	ENSG00000243147	-0.164225	-0.436841				PAIP2B	ENSG00000124374	-0.0861145	2.85373				TDRKH	ENSG00000182134	-0.806464	-0.71783	-0.639639				EMG1	ENSG00000268439	-0.427	-0.566632	-0.423139				ZC3H3	ENSG00000014164	-0.420741	-0.520426	-0.0441585	1.34224
	ZNF473	ENSG00000142528	-0.0379939	-0.479937				RPS11	ENSG00000142534	-0.477042	-0.434926				DDX51	ENSG00000185163	-0.0782199	1.03707				MSI2	ENSG00000153944	-0.763491	-0.714192	-1.075				PATL2	ENSG00000229474	-0.37935	-0.566435	-1.61069				EEF1G	ENSG00000254772	-0.422595	0.330543	-0.382717	-0.60872
	EIF3E	ENSG00000104408	-0.490752	-0.478772				NONO	ENSG00000147140	-0.454291	-0.434415				PRKDC	ENSG00000253729	-0.0720664	0.0808401				QTRTD1	ENSG00000151576	-0.908998	-0.708295	-0.641695				CNP	ENSG00000173786	-0.442244	-0.563482	-0.503754				DHX37	ENSG00000150990	-0.428111	0.455406	0.61262	0.221504
	UTP11L	ENSG00000183520	-0.354787	-0.478362				ZC3H10	ENSG00000135482	-0.0209069	-0.433396				LARP1B	ENSG00000138709	-0.0692257	0.577471				CPSF3	ENSG00000119203	-0.497989	-0.701109	-0.815201				TRMT1	ENSG00000104907	-0.456684	-0.562857	-0.5384				NSUN2	ENSG00000037474	-0.429318	1.4388	1.05849	1.35932
	DDX26B	ENSG00000165359	-0.435283	-0.478191				CXorf23	ENSG00000173681	-1.17916	-0.433208				PLD6	ENSG00000179598	-0.0683433	1.25871				POLR2H	ENSG00000163882	-0.418741	-0.700427	-0.610998				TUT1	ENSG00000149016	-0.398885	-0.562492	-0.236183				NSUN5	ENSG00000130305	-0.43398	-0.313767	0.0758901	0.154724
	RPL30	ENSG00000156482	-0.537064	-0.477101				RPS8	ENSG00000142937	-0.741452	-0.427089				FRG1B	ENSG00000149531	-0.050033	1.31411				XRN2	ENSG00000088930	-0.694695	-0.699383	-0.613001				PNPT1	ENSG00000138035	-0.470089	-0.559703	-0.989352				SCAF1	ENSG00000126461	-0.437677	0.0781234	-0.402671	-0.924124
	RPS15	ENSG00000115268	-0.299676	-0.471513				FRG1B	ENSG00000149531	-0.430225	-0.426096				MTO1	ENSG00000135297	-0.0478375	0.289393				EEF1E1	ENSG00000124802	-0.759964	-0.696025	-1.11906				MRPL34	ENSG00000130312	-0.376591	-0.559131	-0.289225				RPS19	ENSG00000105372	-0.441687	0.250011	-0.659456	-0.579333
	RPS3	ENSG00000149273	-0.378995	-0.468931				XPO1	ENSG00000082898	-0.288937	-0.42572				TRMT1	ENSG00000104907	-0.0387647	0.070573				ENOX2	ENSG00000165675	-0.426875	-0.693691	-0.791809				TRMT6	ENSG00000089195	-0.51754	-0.555517	-1.0332				GTPBP3	ENSG00000130299	-0.446767	-0.0778477	-0.231947	0.174281
	RPL6	ENSG00000089009	-0.351447	-0.46371				BRIX1	ENSG00000113460	-0.716919	-0.424262				U2SURP	ENSG00000163714	-0.0307362	0.318791				EARS2	ENSG00000103356	-0.575159	-0.693455	-0.659729				UPF3B	ENSG00000125351	-0.412882	-0.553832	-0.946953				EXO1	ENSG00000174371	-0.450054	0.339339	0.0710704	-0.146856
	BZW1	ENSG00000082153	-0.700541	-0.463264				MRPL17	ENSG00000158042	-0.521522	-0.421388				FARSA	ENSG00000179115	-0.0231467	0.621227				SUGP2	ENSG00000064607	-0.341314	-0.692712	-0.618126				FBL	ENSG00000105202	-0.170665	-0.553408	-0.172276				POLRMT	ENSG00000099821	-0.458362	-0.916178	-0.864025	0.0612418
	C2orf15	ENSG00000241962	-0.580549	-0.463227				TRMT112	ENSG00000173113	-0.177387	-0.418742				PRPF19	ENSG00000110107	-0.0119508	1.00194				EIF4A1	ENSG00000161960	-0.245185	-0.691219	-0.739792				PTBP3	ENSG00000119314	-0.674901	-0.550452	-1.62963				RPL18	ENSG00000063177	-0.459245	-0.825334	-0.532508	0.23272
	PSTK	ENSG00000179988	-0.322808	-0.459349				NOP58	ENSG00000055044	-0.44794	-0.416065				SLIRP	ENSG00000119705	-0.0107502	0.0502691				VARS2	ENSG00000137411	-0.0749921	-0.69112	-0.387916				LSM12	ENSG00000161654	-0.61274	-0.550076	-0.832527				MRPS34	ENSG00000074071	-0.462902	-2.28787	-1.73472	0.235298
	SMG5	ENSG00000198952	-0.786853	-0.45878				MAGOHB	ENSG00000111196	-0.343894	-0.415672				MRPL55	ENSG00000162910	-0.00840263	0.0285308				YARS2	ENSG00000139131	-0.418609	-0.690683	-0.769842				ZFR2	ENSG00000105278	-1.94775	-0.547168	-4.63				PATL1	ENSG00000166889	-0.482339	0.292114	-0.686457	-0.876213
	ENDOG	ENSG00000167136	-0.264473	-0.458229				EMG1	ENSG00000268439	-1.16931	-0.410835				TBL3	ENSG00000183751	-0.00192938	0.326086				PRPF19	ENSG00000110107	-0.282029	-0.688808	-0.665032				LARS2	ENSG00000011376	-0.360588	-0.545832	-0.276887				RPS28	ENSG00000233927	-0.482461	0.0475058	-0.35647	-0.5592
	POLR1E	ENSG00000137054	-0.176295	-0.456259				STRBP	ENSG00000165209	-0.445192	-0.410696			C4	IGF2BP3	ENSG00000136231	-2.38006	-4.71	0.0954			SNRPA1	ENSG00000131876	-0.698782	-0.688417	-0.754029				CDK5RAP1	ENSG00000101391	-0.437508	-0.545119	-0.719239				MRPL12	ENSG00000262814	-0.485296	-0.639794	-0.628422	0.0127691
	REPIN1	ENSG00000214022	-0.647	-0.45583				RPL35	ENSG00000136942	-0.278163	-0.408206				EZH2	ENSG00000106462	-0.389582	-4.48931				AGO2	ENSG00000123908	-0.721258	-0.684408	-0.868023				NOLC1	ENSG00000166197	-0.606167	-0.539077	-0.737738				MRPL23	ENSG00000214026	-0.488745	-0.861182	-0.87355	0.247359
	UTP20	ENSG00000120800	-0.708423	-0.448173				PES1	ENSG00000100029	-0.705859	-0.407954				MEX3A	ENSG00000254726	-1.16194	-3.87482				NAA38	ENSG00000128534	-0.674936	-0.68296	-0.917505				RBM34	ENSG00000188739	-0.626124	-0.538337	-0.876302				MAGOHB	ENSG00000111196	-0.488783	0.396165	-0.13215	0.641619
	NOM1	ENSG00000146909	-0.2856	-0.446925				DDX27	ENSG00000124228	-0.745563	-0.406816				RNASE10	ENSG00000182545	-0.683111	-3.68937				SNRPD2	ENSG00000125743	-0.109002	-0.666548	-0.933195				LSG1	ENSG00000041802	-0.560253	-0.538275	-1.07098				SNRPF	ENSG00000139343	-0.490171	0.173997	0.00718214	-0.170988
	MRPL41	ENSG00000182154	-0.55263	-0.445419				RPL9	ENSG00000163682	-0.456329	-0.40383				EXO1	ENSG00000174371	-1.12642	-3.67445				BZW2	ENSG00000136261	-0.776679	-0.656154	-0.848589				INTS8	ENSG00000164941	-0.926474	-0.533467	-0.561781				NUTF2	ENSG00000102898	-0.490261	0.458004	-0.463661	0.70136
	MRPL32	ENSG00000106591	-0.478699	-0.444597				RPL10A	ENSG00000198755	-0.706466	-0.398327				EIF2S3L	ENSG00000180574	-0.0342975	-3.42046				RAVER1	ENSG00000161847	-0.26784	-0.651353	-0.0614613				CPSF4	ENSG00000160917	-0.141294	-0.532776	-0.659387				MAZ	ENSG00000103495	-0.49221	0.450845	0.516029	0.114162
	EXOSC8	ENSG00000120699	-0.334671	-0.443007				RPL10	ENSG00000147403	-0.441149	-0.397392				ANG	ENSG00000214274	-0.727253	-3.05179				PTBP1	ENSG00000011304	-0.477713	-0.64891	-0.492542				TDRD1	ENSG00000095627	-1.37146	-0.532234	-2.00439				DDX51	ENSG00000185163	-0.495325	-0.230646	-0.167464	0.280785
	DDX28	ENSG00000182810	-0.00884023	-0.442008				LARP4B	ENSG00000107929	-0.78856	-0.393747				FAM46A	ENSG00000112773	-1.22774	-3.04076				LARP1	ENSG00000155506	-0.493376	-0.639568	-0.61025				METTL1	ENSG00000037897	-0.899042	-0.531468	-0.428947				SND1	ENSG00000197157	-0.49864	0.0993118	0.109392	0.356918
	PATL1	ENSG00000166889	-0.281095	-0.441088				NCBP2	ENSG00000114503	-0.704988	-0.39094				OAS1	ENSG00000089127	-2.08265	-2.68567				NCBP2	ENSG00000114503	-0.628597	-0.638805	-0.641996				CTU2	ENSG00000174177	-0.539546	-0.529551	-0.160481				PUS1	ENSG00000177192	-0.505975	-0.597806	-0.365034	1.37184
	DDX47	ENSG00000213782	-0.262247	-0.440424				RPL19	ENSG00000108298	-0.435066	-0.390706				PABPC4L	ENSG00000254535	-0.936939	-2.57009				PPIH	ENSG00000171960	-0.332621	-0.627812	-0.818752				GEMIN2	ENSG00000092208	-0.351796	-0.529519	-0.66152				NAA38	ENSG00000128534	-0.506155	0.352545	0.250494	-0.0285812
	HNRNPA1	ENSG00000135486	-0.31259	-0.439898				RPL6	ENSG00000089009	-0.531892	-0.389227				PABPC1L	ENSG00000101104	-0.258777	-2.47127				R3HDM1	ENSG00000048991	-0.507991	-0.620934	-0.724053				TRNAU1AP	ENSG00000180098	-0.10668	-0.525524	-0.491601				KIAA0020	ENSG00000080608	-0.508356	-0.283989	-0.37065	2.84002
	YTHDF1	ENSG00000149658	-0.582157	-0.433286				PPIL3	ENSG00000240344	-0.112653	-0.387786				EIF3CL	ENSG00000205609	-0.112151	-2.45992				TFB1M	ENSG00000029639	-0.276367	-0.614782	-0.663786				RAE1	ENSG00000101146	-0.971608	-0.523643	-0.693385				CCDC86	ENSG00000110104	-0.51557	0.00872939	-0.413809	-0.283476
	TDRD1	ENSG00000095627	-2.68876	-0.432643				WRAP53	ENSG00000141499	-0.732677	-0.387759				NXT1	ENSG00000132661	-0.0872568	-2.41461				SNRPC	ENSG00000124562	-0.306195	-0.613848	-0.646814				PRPF19	ENSG00000110107	-0.746149	-0.521455	-0.491402				DUS3L	ENSG00000141994	-0.516027	0.0680237	-0.326799	-0.736963
	EIF2S1	ENSG00000134001	-0.166869	-0.430322				TRIM56	ENSG00000169871	-1.02242	-0.387538				RNASEH2A	ENSG00000104889	-0.744214	-2.37876				MAGOHB	ENSG00000111196	-0.508986	-0.610904	-1.01231				BARD1	ENSG00000138376	-1.19361	-0.519683	-1.69868				ARL6IP4	ENSG00000182196	-0.523051	-0.754343	-0.532905	0.543146
	PPIL3	ENSG00000240344	-0.421561	-0.427012				URB2	ENSG00000135763	-0.593396	-0.386918				APOBEC3G	ENSG00000239713	-0.0980848	-2.33099				DDX28	ENSG00000182810	-0.105449	-0.608593	-0.669179				PPAN	ENSG00000130810	-1.01772	-0.516875	-0.546754				RPL29	ENSG00000162244	-0.525689	-0.0998858	-0.259488	0.0507827
	GTF3A	ENSG00000122034	-0.636368	-0.425791				RPS23	ENSG00000186468	-0.560181	-0.384905				BARD1	ENSG00000138376	-1.29165	-2.2035				MRPL3	ENSG00000114686	-0.50251	-0.606717	-0.820603				TFB1M	ENSG00000029639	-0.232078	-0.516261	-0.579131				CD3EAP	ENSG00000117877	-0.532476	-0.426099	-0.0462218	0.458079
	GFM2	ENSG00000164347	-0.350187	-0.425515				EIF4A3	ENSG00000141543	-0.427782	-0.383852				RPSA	ENSG00000168028	-0.231074	-2.17719				RNASE2	ENSG00000169385	-1.79537	-0.604054	-0.402841				EXOSC3	ENSG00000107371	-0.829897	-0.515083	-1.15869				DDX55	ENSG00000111364	-0.532969	0.0385734	-0.280399	-0.415648
	PTBP2	ENSG00000117569	-0.586649	-0.424629				RPS14	ENSG00000164587	-0.362931	-0.383482				OAS3	ENSG00000111331	-2.38453	-2.08338				RNASET2	ENSG00000026297	-0.304133	-0.602016	-0.368215				CNOT6	ENSG00000113300	-0.622062	-0.512492	-0.994256				EXOSC5	ENSG00000077348	-0.549366	1.15686	0.585691	-0.0419225
	TUT1	ENSG00000149016	-0.648424	-0.423582				NOP16	ENSG00000048162	-0.214128	-0.372054				ERI1	ENSG00000104626	-0.126721	-2.02162				WARS	ENSG00000140105	-1.3771	-0.60038	-0.350325				RPS19	ENSG00000105372	-0.270293	-0.511718	-0.329643				TRPT1	ENSG00000149743	-0.551946	0.238246	-0.164712	-0.177033
	LARP1	ENSG00000155506	-0.539113	-0.421729				SNRPN	ENSG00000128739	-1.16125	-0.367238				OASL	ENSG00000135114	-0.928997	-2.01694				EIF2AK1	ENSG00000086232	-0.503897	-0.599168	-0.438281				CLK2	ENSG00000176444	-0.588908	-0.510115	-0.65017				PABPC1	ENSG00000070756	-0.552472	-0.493587	-0.179449	0.49588
	CELF4	ENSG00000101489	-0.928759	-0.418152				SMAD3	ENSG00000166949	-1.35403	-0.364912				PTBP1	ENSG00000011304	-0.121014	-1.9635				NPM1	ENSG00000181163	-0.270977	-0.596548	-1.05455				PES1	ENSG00000100029	-0.57034	-0.508155	-0.272121				NOP2	ENSG00000111641	-0.557009	0.629088	0.0859542	0.242828
	NSUN6	ENSG00000241058	-0.418182	-0.417509				RAVER1	ENSG00000161847	-1.41684	-0.36279				OAS2	ENSG00000111335	-0.895343	-1.90975				MRPL37	ENSG00000116221	-0.0255332	-0.593809	-0.607151				KIAA0020	ENSG00000080608	-0.243716	-0.50782	-0.883823				RPL35	ENSG00000136942	-0.571547	-0.798265	-0.569409	0.053661
	RPL28	ENSG00000108107	-0.406747	-0.416674				MRPL47	ENSG00000136522	-0.291362	-0.358628				DZIP1L	ENSG00000158163	-1.5503	-1.8891				TRIT1	ENSG00000043514	-0.172889	-0.584254	-0.761451				PABPC1	ENSG00000070756	-0.586626	-0.505033	-0.894021				INTS8	ENSG00000164941	-0.575226	-0.0376423	0.0864214	0.248814
	TXNL4A	ENSG00000141759	-0.308571	-0.413455				PARP12	ENSG00000059378	-0.442681	-0.357168				RPS3	ENSG00000149273	-0.0760152	-1.79416				TRUB2	ENSG00000167112	-0.143425	-0.58345	-0.419784				ILF3	ENSG00000129351	-0.478852	-0.50063	-0.661938				EIF3B	ENSG00000106263	-0.575668	0.117567	-0.26468	0.265637
	DHX40	ENSG00000108406	-0.416222	-0.41035				PSIP1	ENSG00000164985	-0.187988	-0.356259				RBMS1	ENSG00000153250	-1.16025	-1.76862				SMG5	ENSG00000198952	-0.406398	-0.582441	-0.177203				STAU2	ENSG00000040341	-0.555398	-0.497817	-0.547891				MRPL21	ENSG00000197345	-0.579396	-0.508796	-0.561728	0.19973
	UHMK1	ENSG00000152332	-0.600603	-0.407819				UTP20	ENSG00000120800	-1.04951	-0.355515				RPL21	ENSG00000122026	-0.0813157	-1.7646				LSM4	ENSG00000130520	-0.142261	-0.582007	-0.592574				FARSB	ENSG00000116120	-0.422717	-0.490295	-0.150592				CPSF1	ENSG00000071894	-0.588784	-0.283901	0.253784	0.85508
	STAU2	ENSG00000040341	-0.72699	-0.400701				NAT10	ENSG00000135372	-0.453719	-0.354829				DDX39A	ENSG00000123136	-0.213499	-1.75703				LSG1	ENSG00000041802	-0.815367	-0.576473	-0.484971				MEX3D	ENSG00000181588	-0.927659	-0.488804	-0.968452				RPLP0	ENSG00000089157	-0.58962	0.165574	-0.352985	-0.00124299
	TRMT13	ENSG00000122435	-0.481876	-0.395401				JAKMIP1	ENSG00000152969	-0.201205	-0.353736				PARP12	ENSG00000059378	-0.284917	-1.73273				SCAF1	ENSG00000126461	-0.0872317	-0.575205	-0.177485				INTS9	ENSG00000104299	-0.189002	-0.477961	-0.209413				CPSF4	ENSG00000160917	-0.597686	0.163093	-0.0446025	-0.163314
	EXOSC7	ENSG00000075914	-0.108811	-0.394635				EXOSC8	ENSG00000120699	-0.199351	-0.353328				LSM5	ENSG00000106355	-0.159548	-1.72839				RIOK1	ENSG00000124784	-0.468816	-0.565786	-0.76564				UHMK1	ENSG00000152332	-0.674714	-0.476711	-1.44265				RNASEH2A	ENSG00000104889	-0.597839	0.38243	-0.294683	-0.905452
	SND1	ENSG00000197157	-0.521505	-0.394128				GEMIN2	ENSG00000092208	-0.178735	-0.352467				CPSF4L	ENSG00000187959	-2.12621	-1.67861				AIMP2	ENSG00000106305	-0.144294	-0.560936	-0.253977				EPRS	ENSG00000136628	-0.837872	-0.474208	-0.67676				QTRT1	ENSG00000213339	-0.605512	-0.0252961	0.0600167	0.0204112
	RPS8	ENSG00000142937	-0.51387	-0.392804				MATR3	ENSG00000015479	-0.202011	-0.350406				IFIH1	ENSG00000115267	-0.211003	-1.6716				NSUN6	ENSG00000241058	-0.341231	-0.548208	-0.545708				MRPS35	ENSG00000061794	-0.668913	-0.470217	-0.453768				CD2BP2	ENSG00000169217	-0.605542	0.269402	0.355361	-0.0147797
	DDX31	ENSG00000125485	-0.282277	-0.392506				C11orf68	ENSG00000175573	-0.354726	-0.350012				AEN	ENSG00000181026	-0.829967	-1.66226				DDX47	ENSG00000213782	-0.755197	-0.543034	-0.67557				IPO13	ENSG00000117408	-0.433805	-0.465374	-0.313029				THOC6	ENSG00000131652	-0.613316	0.8913	0.406215	0.454465
	RPL12	ENSG00000197958	-0.62054	-0.389633				RPP25	ENSG00000178718	-1.09628	-0.348228				LSM7	ENSG00000130332	-0.687301	-1.63943				EIF4A3	ENSG00000141543	-0.3548	-0.542281	-0.583667				ZNF598	ENSG00000167962	-0.914073	-0.464404	-0.751219				IGHMBP2	ENSG00000132740	-0.61516	1.61342	0.802132	-0.69602
	MRPL46	ENSG00000259494	-0.156419	-0.389524				STAU2	ENSG00000040341	-0.0356282	-0.345681				RPL35	ENSG00000136942	-0.0273487	-1.62773				NARS2	ENSG00000137513	-0.719257	-0.541309	-0.64948				MRPL11	ENSG00000174547	-0.452087	-0.463494	-0.498755				RPL30	ENSG00000156482	-0.618389	0.184293	0.560182	0.111645
	SMG9	ENSG00000105771	-0.295783	-0.383784				PPAN	ENSG00000130810	-0.399315	-0.345008				DDX60L	ENSG00000181381	-0.536218	-1.60241				SF3B4	ENSG00000143368	-0.381058	-0.540831	-0.321475				EARS2	ENSG00000103356	-0.75545	-0.46037	-0.49844				FARSA	ENSG00000179115	-0.624252	-0.61205	-0.530098	0.371615
	RBMX	ENSG00000147274	-0.309163	-0.380804				QTRT1	ENSG00000213339	-0.205099	-0.342617				RPS15	ENSG00000115268	-0.144018	-1.59202				ILF2	ENSG00000143621	-0.552427	-0.540073	-0.657218				MRPL16	ENSG00000166902	-0.110663	-0.450798	-0.0711447				MRPL51	ENSG00000111639	-0.626255	0.0421748	0.12847	-0.636547
	MTRF1	ENSG00000120662	-0.559006	-0.378052				POLR2F	ENSG00000100142	-1.46359	-0.337957				ZC3HAV1	ENSG00000105939	-0.384039	-1.49445				HNRNPA1	ENSG00000135486	-0.273561	-0.539412	-0.695678				GRSF1	ENSG00000132463	-0.372684	-0.447016	-0.121106				NOC4L	ENSG00000184967	-0.630147	0.532072	-0.287691	-0.554914
	DDX21	ENSG00000165732	-0.155245	-0.375227				PTRF	ENSG00000177469	-1.25495	-0.333961				HELZ2	ENSG00000130589	-1.16208	-1.47999				FARSB	ENSG00000116120	-0.34906	-0.535214	-0.657043				PRIM1	ENSG00000198056	-0.734292	-0.442885	-2.01894				SRA1	ENSG00000213523	-0.632418	0.199903	-0.438887	-1.01765
	TBL3	ENSG00000183751	-0.458648	-0.37242				ZNF385A	ENSG00000161642	-0.769787	-0.333595				RNASE4	ENSG00000258818	-0.0177834	-1.46444				PRIM1	ENSG00000198056	-0.865777	-0.529436	-0.923849				NOP56	ENSG00000101361	-0.779588	-0.440377	-0.890908				MVP	ENSG00000013364	-0.634545	0.213229	-0.0681233	-0.293478
	DDX51	ENSG00000185163	-0.299019	-0.372334				TBRG4	ENSG00000136270	-0.178688	-0.330765				PRIM1	ENSG00000198056	-0.826818	-1.46083				POLR2G	ENSG00000168002	-0.0949587	-0.522575	-0.744435				DHX32	ENSG00000089876	-0.229602	-0.438377	-0.602457				RPL39	ENSG00000198918	-0.648085	0.377991	-0.102916	2.04832
	GLE1	ENSG00000119392	-0.165549	-0.371493				DENR	ENSG00000139726	-0.46932	-0.329528				BRCA1	ENSG00000012048	-0.847496	-1.43063				C1QBP	ENSG00000108561	-0.33154	-0.518715	-0.71092				DENR	ENSG00000139726	-0.462542	-0.435455	-0.648764				LSM7	ENSG00000130332	-0.650064	0.191883	-0.0962912	0.623379
	TNPO1	ENSG00000083312	-0.321857	-0.365576				AEN	ENSG00000181026	-0.581401	-0.322814				RPS4X	ENSG00000198034	-0.0389268	-1.42351				LARS2	ENSG00000011376	-0.458319	-0.518696	-0.310123				RAVER1	ENSG00000161847	-0.841891	-0.433969	-0.658148				NOP10	ENSG00000182117	-0.652465	0.591408	0.339168	0.0574344
	SCAF1	ENSG00000126461	-0.143125	-0.361985				HTATSF1	ENSG00000102241	-0.294659	-0.321214				ISG20	ENSG00000172183	-0.0246764	-1.41605				SLBP	ENSG00000163950	-0.516448	-0.50356	-0.780031				UTP20	ENSG00000120800	-0.0685612	-0.431602	-0.469564				RPS5	ENSG00000083845	-0.655375	0.967291	0.394843	-0.0366076
	MRPL39	ENSG00000154719	-0.21619	-0.35735				TRMT13	ENSG00000122435	-0.323633	-0.319294				DDX60	ENSG00000137628	-0.72444	-1.40252				KHDRBS3	ENSG00000131773	-0.311329	-0.501647	-0.777931				NCBP1	ENSG00000136937	-0.500786	-0.431301	-1.12784				R3HDM2	ENSG00000179912	-0.655578	0.235486	0.158525	-0.743252
	WRAP53	ENSG00000141499	-0.171624	-0.352504				RPS6	ENSG00000137154	-0.563502	-0.317319				CALR	ENSG00000179218	-0.190099	-1.36453				PATL1	ENSG00000166889	-0.535761	-0.499781	-0.43969				IFIT3	ENSG00000119917	-0.999661	-0.425795	-1.70634				EMG1	ENSG00000268439	-0.656147	0.409425	0.328482	-0.533104
	GRSF1	ENSG00000132463	-0.329956	-0.349112				RBFOX2	ENSG00000100320	-0.407203	-0.31525				NPM1	ENSG00000181163	-0.10764	-1.34521				SNRPE	ENSG00000182004	-0.599187	-0.499215	-0.795997				YTHDF1	ENSG00000149658	-0.65355	-0.418344	-0.316649				WDR5	ENSG00000196363	-0.658671	0.133801	0.00030319	-0.457418
	RPL27	ENSG00000131469	-0.343241	-0.346927				WDR12	ENSG00000138442	-0.298155	-0.314325				DHX40	ENSG00000108406	-0.444887	-1.31273				EIF3I	ENSG00000084623	-0.0328856	-0.496961	-0.603567				NSUN7	ENSG00000179299	-0.000120927	-0.416772	-0.926822				RPL22L1	ENSG00000163584	-0.660906	0.456536	-0.342131	-0.084443
	HTATSF1	ENSG00000102241	-0.33068	-0.345605				EIF2S2	ENSG00000125977	-0.238239	-0.311244				SNRNP40	ENSG00000060688	-0.0191774	-1.2697				DCPS	ENSG00000110063	-0.0878063	-0.495673	-0.774236				DDX58	ENSG00000107201	-0.963141	-0.41564	-0.825622				UTP14A	ENSG00000156697	-0.669131	0.371689	0.983143	0.0911033
	TFIP11	ENSG00000100109	-0.0155067	-0.343658				EXOSC2	ENSG00000130713	-0.120284	-0.31084				SNRPF	ENSG00000139343	-0.285506	-1.26037				EIF3M	ENSG00000149100	-0.226153	-0.48502	-0.676681				ARL6IP4	ENSG00000182196	-0.586742	-0.415541	-0.25403				ILF3	ENSG00000129351	-0.678346	0.285122	-0.099353	0.337674
	RPSA	ENSG00000168028	-0.448479	-0.341892				RPL5	ENSG00000122406	-0.593773	-0.30807				SMAD5	ENSG00000113658	-0.00235174	-1.16015				RPL26L1	ENSG00000037241	-0.0647756	-0.48174	-0.628197				CTU1	ENSG00000142544	-0.877488	-0.415535	-1.10791				PABPC3	ENSG00000151846	-0.690693	-1.07541	-1.05108	0.0033791
	NUDT16L1	ENSG00000168101	-0.666747	-0.334577				NOC4L	ENSG00000184967	-0.280592	-0.305501				RAVER1	ENSG00000161847	-0.154697	-1.15259				NSUN2	ENSG00000037474	-0.779162	-0.480646	-0.524499				TRMT10A	ENSG00000145331	-0.377775	-0.406466	-0.780705				RUVBL2	ENSG00000183207	-0.695312	0.00936082	-0.358372	-0.568878
	TRMT10A	ENSG00000145331	-0.428718	-0.332775				DDX56	ENSG00000136271	-0.144979	-0.302909				DNMT3B	ENSG00000088305	-1.35936	-1.14362				REXO1	ENSG00000079313	-0.147415	-0.48041	-0.140571				SCAF1	ENSG00000126461	-0.74972	-0.402237	-0.297041				RPL35A	ENSG00000182899	-0.700404	0.751546	0.373293	0.325493
	PUS3	ENSG00000110060	-0.303545	-0.331249				PHF5A	ENSG00000100410	-0.21845	-0.302294				TLR7	ENSG00000196664	-0.232907	-1.11527				USP39	ENSG00000168883	-0.273044	-0.475658	-0.533717				PATL1	ENSG00000166889	-0.239396	-0.401543	-0.817294				DDX47	ENSG00000213782	-0.706119	1.08795	-0.832831	0.140848
	XRN2	ENSG00000088930	-0.147259	-0.3304				NOL10	ENSG00000115761	-0.205678	-0.300896				ALYREF	ENSG00000183684	-0.131281	-1.10807				WRAP53	ENSG00000141499	-0.36358	-0.461754	-0.487143				CCDC86	ENSG00000110104	-0.520701	-0.398721	-0.484424				GNL3	ENSG00000163938	-0.710729	0.660796	0.352665	0.0440384
	MRPS6	ENSG00000243927	-0.737131	-0.328276				PTBP3	ENSG00000119314	-0.925557	-0.299833				CPSF4	ENSG00000160917	-0.0153185	-1.09938				DDX43	ENSG00000080007	-0.554031	-0.460469	-0.506546				PHF5A	ENSG00000100410	-0.322973	-0.398392	-0.635783				SPATS2	ENSG00000123352	-0.719567	0.205306	-0.110133	-0.088649
	GTPBP2	ENSG00000172432	-0.691062	-0.326917				RNASE7	ENSG00000165799	-2.61447	-0.299044				SMAD1	ENSG00000170365	-0.724538	-1.07695				NOL10	ENSG00000115761	-0.563124	-0.455143	-0.593561				ZNF768	ENSG00000169957	-0.886673	-0.39656	-0.0284877				SNRPD2	ENSG00000125743	-0.721686	-0.825173	-0.89804	0.044425
	MRPL16	ENSG00000166902	-0.314844	-0.326188				SNRPG	ENSG00000143977	-0.0624176	-0.297408				MIF4GD	ENSG00000125457	-0.102835	-1.07624				AC004381.6	ENSG00000005189	-0.430968	-0.450886	-0.856011				LAS1L	ENSG00000001497	-0.525461	-0.382318	-0.562114				RPS16	ENSG00000105193	-0.721982	-0.522731	-0.518219	0.0323013
	RRP12	ENSG00000052749	-0.626431	-0.324424				U2AF1	ENSG00000160201	-0.566142	-0.294573				USP39	ENSG00000168883	-0.269793	-1.06422				BARD1	ENSG00000138376	-0.627362	-0.443158	-0.74549				NSUN2	ENSG00000037474	-0.475496	-0.381856	-1.12615				GEMIN7	ENSG00000142252	-0.736867	0.509294	0.3798	-0.20655
	PABPC4L	ENSG00000254535	-0.239814	-0.315661				DDX31	ENSG00000125485	-0.5321	-0.287885				AZGP1	ENSG00000160862	-0.331763	-1.05961				WARS2	ENSG00000116874	-0.209528	-0.442759	-0.235786				NAT10	ENSG00000135372	-0.713114	-0.377728	-0.364705				POLR2J3	ENSG00000168255	-0.7441	-0.45261	-0.215327	1.10644
	RPS4X	ENSG00000198034	-0.314274	-0.314992				RNASET2	ENSG00000026297	-0.2101	-0.282406				RBMX	ENSG00000147274	-0.0196709	-1.03946				MRPL30	ENSG00000185414	-0.0698118	-0.437049	-0.557049				RRS1	ENSG00000179041	-1.1839	-0.374901	-0.451443				CALR	ENSG00000179218	-0.749438	0.518053	-0.0666513	-0.611213
	ERN2	ENSG00000134398	-3.08019	-0.312348				DDX10	ENSG00000178105	-0.167052	-0.281952				SARNP	ENSG00000205323	-0.198113	-1.03289				RBMX	ENSG00000147274	-0.153802	-0.418507	-0.645332				NOL6	ENSG00000165271	-0.452226	-0.371364	-0.955907				RPL24	ENSG00000114391	-0.751292	0.0489765	-0.17718	-0.198692
	RPS26	ENSG00000197728	-0.458976	-0.308011				HNRNPAB	ENSG00000197451	-0.248042	-0.281682				TARBP2	ENSG00000139546	-0.0391197	-1.02711				U2AF1	ENSG00000160201	-0.436291	-0.415858	-0.405991				BRIX1	ENSG00000113460	-0.70017	-0.371053	-1.19275				EIF2S2	ENSG00000125977	-0.752819	-0.194675	0.138102	0.0817835
	RALY	ENSG00000125970	-0.318964	-0.306432				SRPK2	ENSG00000135250	-0.721268	-0.279691				CPSF3	ENSG00000119203	-0.155799	-1.01053				MRPL14	ENSG00000180992	-0.084874	-0.410858	-0.33237				RPLP0	ENSG00000089157	-0.0652503	-0.36461	-0.000799057				DDX49	ENSG00000105671	-0.754573	0.29059	-0.170112	-0.0120356
	ELAC2	ENSG00000006744	-0.265984	-0.300502				MECP2	ENSG00000169057	-0.893764	-0.272853				RBMS2	ENSG00000076067	-0.216185	-0.971306				MRPL12	ENSG00000262814	-0.527151	-0.409799	-0.320111				C2orf15	ENSG00000241962	-0.112475	-0.358469	-0.0996107				DDX56	ENSG00000136271	-0.780617	-0.0324626	0.151598	0.975614
	PAN2	ENSG00000135473	-0.282351	-0.296514				MRPS34	ENSG00000074071	-0.0882517	-0.266291				ZC3HAV1L	ENSG00000146858	-0.0292786	-0.969265				APOBEC3H	ENSG00000100298	-0.54203	-0.404731	-0.223651				MRPL30	ENSG00000185414	-0.141841	-0.356635	-0.335453				METTL1	ENSG00000037897	-0.782295	0.209226	-0.308553	-0.961539
	TDRKH	ENSG00000182134	-1.4082	-0.294859				KIAA0020	ENSG00000080608	-0.523569	-0.265877				MAGOHB	ENSG00000111196	-0.297264	-0.957733				IGF2BP2	ENSG00000073792	-1.54257	-0.401555	-0.371466				NKRF	ENSG00000186416	-0.39437	-0.355199	-0.913133				RPS3	ENSG00000149273	-0.78364	1.19902	0.801727	0.409543
	RPL10A	ENSG00000198755	-0.387652	-0.289893				RPL12	ENSG00000197958	-0.399804	-0.264815				WRAP53	ENSG00000141499	-0.0812298	-0.936976				CNOT11	ENSG00000158435	-0.361254	-0.400211	-0.295021				CLASRP	ENSG00000104859	-0.314682	-0.349423	-0.384927				RPL32	ENSG00000144713	-0.78454	0.113547	0.243708	0.0539353
	EIF4G3	ENSG00000075151	-0.512877	-0.288844				RPS4X	ENSG00000198034	-0.884263	-0.259951				EMG1	ENSG00000268439	-0.22888	-0.927163				NSUN4	ENSG00000117481	-0.181257	-0.398652	-0.378445				CMSS1	ENSG00000184220	-0.458472	-0.342495	-0.460378				POLR2I	ENSG00000105258	-0.796718	0.0534102	-0.00459546	0.0858865
	RPL13A	ENSG00000142541	-0.365074	-0.277182				RPL24	ENSG00000114391	-0.0909559	-0.257282				RBM3	ENSG00000102317	-0.374112	-0.913261				PLD6	ENSG00000179598	-0.308263	-0.39767	-0.835269				DDX21	ENSG00000165732	-0.222616	-0.337536	-0.760737				EIF2B5	ENSG00000145191	-0.803985	-0.115829	0.177514	-0.516881
	LARP1B	ENSG00000138709	-0.405281	-0.27145				PTBP1	ENSG00000011304	-0.202152	-0.256219				THOC6	ENSG00000131652	-0.0735375	-0.89887				LSM5	ENSG00000106355	-0.584555	-0.396515	-0.821907				MRPS23	ENSG00000181610	-1.01493	-0.337384	-0.413899				RPS26	ENSG00000197728	-0.818306	-0.362628	0.383876	0.559281
	SPATS2L	ENSG00000196141	-0.620783	-0.269607				TBL3	ENSG00000183751	-0.0603999	-0.256053				TNPO1	ENSG00000083312	-1.01198	-0.881986				NOL11	ENSG00000130935	-0.618498	-0.395663	-0.549516				DDX28	ENSG00000182810	-0.212423	-0.333256	-0.250052				U2AF1	ENSG00000160201	-0.82174	-0.999413	-1.00209	0.00854294
	SARNP	ENSG00000205323	-0.246174	-0.267322				RPL13	ENSG00000167526	-0.543514	-0.251533				GTF3A	ENSG00000122034	-0.259748	-0.87085				DROSHA	ENSG00000113360	-0.488786	-0.381802	-0.330883				AARS	ENSG00000090861	-0.405023	-0.329624	-0.379669				RPL18A	ENSG00000105640	-0.822828	-0.661585	0.0495368	1.47915
	RPL19	ENSG00000108298	-0.409385	-0.266098				INTS9	ENSG00000104299	-0.733582	-0.249972				GEMIN7	ENSG00000142252	-0.4163	-0.870459				DARS2	ENSG00000117593	-1.1104	-0.380017	-0.246507				GSPT1	ENSG00000103342	-0.553262	-0.328629	-0.584867				TARS2	ENSG00000143374	-0.824108	-0.307718	-0.364161	0.212361
	ZCCHC9	ENSG00000131732	-0.418756	-0.265462				NOL6	ENSG00000165271	-0.286172	-0.249351				INTS7	ENSG00000143493	-0.28483	-0.852133				CALR	ENSG00000179218	-0.0244695	-0.378394	-0.359703				DDX27	ENSG00000124228	-0.582137	-0.326826	-0.369046				HNRNPAB	ENSG00000197451	-0.828599	0.432483	0.0461525	0
	ESRP2	ENSG00000103067	-0.619139	-0.259168				ZNF768	ENSG00000169957	-0.292003	-0.249066				ZNF473	ENSG00000142528	-0.792012	-0.851531				EIF3E	ENSG00000104408	-0.0911001	-0.377724	-0.83119				NCBP2	ENSG00000114503	-0.502588	-0.323888	-0.776926				TUT1	ENSG00000149016	-0.834778	-0.870709	-0.293161	0.683449
	RPL13	ENSG00000167526	-0.348038	-0.258948				DDX26B	ENSG00000165359	-1.57436	-0.246023				INTS8	ENSG00000164941	-0.576889	-0.848482				EPRS	ENSG00000136628	-0.557729	-0.376518	-0.467062				RNASEK	ENSG00000219200	-0.051866	-0.315722	-0.23368				RNASE3	ENSG00000169397	-0.836391	0.119851	0.585708	1.20336
	PCBP3	ENSG00000183570	-0.74228	-0.246132				R3HCC1L	ENSG00000166024	-0.856495	-0.243946				DDX58	ENSG00000107201	-0.494631	-0.845217				SNRPD1	ENSG00000167088	-1.08339	-0.364999	-0.852496				GLE1	ENSG00000119392	-0.49194	-0.309978	-0.937335				FXR1	ENSG00000114416	-0.839221	0.0625198	-0.0436425	0.014321
	MRPL49	ENSG00000149792	-0.270774	-0.244544				RPS3A	ENSG00000145425	-0.578312	-0.237359				PUS3	ENSG00000110060	-0.377552	-0.833464				SPATS2	ENSG00000123352	-0.161412	-0.361108	-0.459391				NONO	ENSG00000147140	-0.489509	-0.309765	-0.452888				DHX32	ENSG00000089876	-0.846324	0.496712	0.00246947	0.0651011
	RPL41	ENSG00000229117	-0.319888	-0.242509				EEF1B2	ENSG00000114942	-0.432578	-0.235605				RNASET2	ENSG00000026297	-1.69764	-0.792634				TARS	ENSG00000113407	-0.390779	-0.355429	-0.465999				ZNF473	ENSG00000142528	-0.248804	-0.307943	-0.837033				DNMT1	ENSG00000130816	-0.85014	0.292457	-0.0251145	-0.23015
	IPO5	ENSG00000065150	-0.166943	-0.24078				CIRBP	ENSG00000099622	-0.391151	-0.235599				AC004381.6	ENSG00000005189	-0.745846	-0.747687				ZC3HC1	ENSG00000091732	-0.10125	-0.349982	-0.395905				SNRNP40	ENSG00000060688	-0.408613	-0.30569	-0.631585				LUC7L	ENSG00000007392	-0.855102	0.131461	0.146499	0.24714
	SMG1	ENSG00000157106	-0.314258	-0.239998				FARSA	ENSG00000179115	-0.357672	-0.234296				IFIT3	ENSG00000119917	-0.00367145	-0.74202				RBM44	ENSG00000177483	-0.52708	-0.344062	-0.916797				TSEN34	ENSG00000170892	-0.924484	-0.304816	-0.541136				SNRPD1	ENSG00000167088	-0.857702	0.391816	-0.0787332	-0.570555
	REXO1	ENSG00000079313	-0.0440251	-0.23709				RSRC1	ENSG00000174891	-0.392707	-0.23162				RALY	ENSG00000125970	-0.230473	-0.741795				MOV10L1	ENSG00000073146	-1.08314	-0.342948	-1.04644				SUGP2	ENSG00000064607	-0.373673	-0.301235	-0.322276				TRMT2A	ENSG00000099899	-0.86379	-0.552977	-0.506922	0.11546
	RPS15A	ENSG00000134419	-0.291638	-0.236861				TFIP11	ENSG00000100109	-0.0690111	-0.228922				SNRPD1	ENSG00000167088	-0.463674	-0.735219				EIF2B5	ENSG00000145191	-0.253116	-0.340631	-0.307158				LARP1	ENSG00000155506	-0.308054	-0.300228	-0.495298				CLASRP	ENSG00000104859	-0.875789	0.17024	-0.258393	-0.502668
	RPL27A	ENSG00000166441	-0.406405	-0.234321				WARS	ENSG00000140105	-0.638855	-0.226079				GAPDH	ENSG00000111640	-0.930466	-0.711025				U2SURP	ENSG00000163714	-0.700749	-0.337374	-0.668617				ZC3HC1	ENSG00000091732	-0.128305	-0.299732	-0.0747669				GTF3A	ENSG00000122034	-0.884595	-0.100405	0.0693566	-0.212853
	APOBEC3G	ENSG00000239713	-0.199867	-0.224997				ENOX2	ENSG00000165675	-0.194981	-0.218235				RPL38	ENSG00000172809	-0.030108	-0.689531				NCBP1	ENSG00000136937	-0.512983	-0.33585	-0.101386				NOL11	ENSG00000130935	-0.641346	-0.298005	-0.663932				RPL26L1	ENSG00000037241	-0.907569	0.0660079	-0.126426	-1.02027
	DHX32	ENSG00000089876	-0.549169	-0.221916				ISG20	ENSG00000172183	-1.53926	-0.216148				MEX3D	ENSG00000181588	-1.1244	-0.685488				PTBP3	ENSG00000119314	-0.575324	-0.334192	-0.376206				LARP1B	ENSG00000138709	-0.45896	-0.297042	-0.401289				RRP1	ENSG00000160214	-0.910638	0.589687	0.0589452	-0.377075
	OAS1	ENSG00000089127	-1.22796	-0.218975				SF3B14	ENSG00000115128	-0.0765046	-0.21388				RPL39L	ENSG00000163923	-0.611864	-0.646602				MRPS30	ENSG00000112996	-0.363515	-0.331591	-0.45266				ERI2	ENSG00000196678	-0.52188	-0.295859	-1.44651				RPL39L	ENSG00000163923	-0.927057	0.241987	-0.076693	-0.0420703
	EIF4A1	ENSG00000161960	-0.268182	-0.211422				TARBP2	ENSG00000139546	-0.34156	-0.211909				XPO5	ENSG00000124571	-0.09062	-0.646467				R3HDM2	ENSG00000179912	-0.199137	-0.326701	-0.258587				TRMT10C	ENSG00000174173	-0.270617	-0.295052	-0.395544				PTBP1	ENSG00000011304	-0.939302	0.443761	0.0615748	-0.316064
	EEF1B2	ENSG00000114942	-0.481278	-0.201061				EIF3M	ENSG00000149100	-0.125357	-0.208955				EIF3B	ENSG00000106263	-0.112171	-0.643971				EIF5A	ENSG00000132507	-0.0712783	-0.326172	-0.446281				KIAA0391	ENSG00000100890	-0.15439	-0.290617	-1.04732				CXorf23	ENSG00000173681	-0.954809	0.703056	0.0664795	-0.283386
	REXO2	ENSG00000076043	-0.293234	-0.199873				PNO1	ENSG00000115946	-0.437399	-0.204122				NOVA1	ENSG00000139910	-3.27644	-0.634103				FTSJ3	ENSG00000108592	-0.288264	-0.324493	-0.313774				DDX55	ENSG00000111364	-0.339454	-0.288962	-0.830243				EXOSC3	ENSG00000107371	-1.00644	0.326856	-0.169126	-0.162099
	EIF2B3	ENSG00000070785	-0.175518	-0.192293				EIF2B5	ENSG00000145191	-0.160972	-0.201365				RSL24D1	ENSG00000137876	-0.423276	-0.612458				SNRNP40	ENSG00000060688	-0.19714	-0.324317	-0.453683				IFIH1	ENSG00000115267	-0.93604	-0.278457	-1.67327				RPS21	ENSG00000171858	-1.00693	-0.0635692	1.2946	-2.69157
	RPL23A	ENSG00000198242	-0.464415	-0.191982				FXR1	ENSG00000114416	-0.186345	-0.190964				RBM44	ENSG00000177483	-1.165	-0.60561				CARS	ENSG00000110619	-0.0246688	-0.312308	-0.300523				ZC3H12D	ENSG00000178199	-0.979191	-0.261796	-1.04583				DUS1L	ENSG00000169718	-1.02655	3.24192	0.860927	-0.85731
	MTO1	ENSG00000135297	-0.0393346	-0.189783				NXT1	ENSG00000132661	-0.604352	-0.187821				DNMT1	ENSG00000130816	-0.650652	-0.59385				LARP4	ENSG00000161813	-0.504667	-0.307258	-0.486362				CARHSP1	ENSG00000153048	-0.345757	-0.250515	-1.01308				RPL38	ENSG00000172809	-1.03468	0.293617	0.247213	-0.739881
	RPLP2	ENSG00000177600	-0.308988	-0.188993				FBXO17	ENSG00000104835	-0.182605	-0.176589				GTPBP2	ENSG00000172432	-0.902132	-0.578926				EIF4G1	ENSG00000114867	-0.170732	-0.297989	-0.216299				HEATR1	ENSG00000119285	-0.434314	-0.250192	-1.11293				TRMT112	ENSG00000173113	-1.0361	0.767559	0.195419	-1.89949
	RPS29	ENSG00000213741	-0.29281	-0.188108				RPS25	ENSG00000118181	-0.00923323	-0.175551				PRPF4	ENSG00000136875	-0.184187	-0.556054				RSRC1	ENSG00000174891	-0.506189	-0.297326	-0.522631				TEFM	ENSG00000172171	-0.207904	-0.247271	-0.751462				SNRPA1	ENSG00000131876	-1.04643	0.738013	0.430521	-0.33425
	NARS2	ENSG00000137513	-0.153374	-0.188072				ARL6IP4	ENSG00000182196	-0.240584	-0.174583				RPL15	ENSG00000174748	-0.141796	-0.551559				POP5	ENSG00000167272	-0.234391	-0.296485	-0.510728				QTRTD1	ENSG00000151576	-0.410576	-0.240584	-1.25182				DHX34	ENSG00000134815	-1.0627	-0.371987	-0.657732	0.00525136
	RPS3A	ENSG00000145425	-0.241083	-0.186642				SMAD5	ENSG00000113658	-0.822451	-0.17361				DUS4L	ENSG00000105865	-0.403161	-0.521187				MRPL15	ENSG00000137547	-0.464502	-0.29637	-0.506559				WDR3	ENSG00000065183	-0.234751	-0.240147	-0.742599				MRPL11	ENSG00000174547	-1.06274	0.479144	0.00775335	-0.540638
	RPL23	ENSG00000125691	-0.216113	-0.181533				GEMIN8	ENSG00000046647	-1.05696	-0.16851				WARS	ENSG00000140105	-0.224836	-0.503225				PSTK	ENSG00000179988	-0.114946	-0.288177	-0.517182				NIFK	ENSG00000155438	-0.404519	-0.239836	-0.438911				ZC3HC1	ENSG00000091732	-1.06672	1.08623	1.38344	1.78984
	METTL10	ENSG00000203791	-0.027779	-0.180843				NIFK	ENSG00000155438	-0.469608	-0.164636				GEMIN2	ENSG00000092208	-0.410029	-0.490148				TFB2M	ENSG00000162851	-0.667979	-0.287791	-0.515965				PPRC1	ENSG00000148840	-0.287561	-0.237708	-0.0875811				UPF3B	ENSG00000125351	-1.07431	0.343501	-0.34944	-0.28962
	AEN	ENSG00000181026	-0.37705	-0.167532				RPS9	ENSG00000170889	-0.218723	-0.160094				RBM28	ENSG00000106344	-0.137123	-0.474444				XPO1	ENSG00000082898	-0.771671	-0.287371	-0.575851				AZGP1	ENSG00000160862	-0.226278	-0.236772	-2.15744				TLR8	ENSG00000101916	-1.08834	0.57283	0.325665	-0.0857858
	LSM11	ENSG00000155858	-0.14866	-0.165258				LSG1	ENSG00000041802	-0.278389	-0.159428				MKRN3	ENSG00000179455	-0.0244747	-0.473151				LARP4B	ENSG00000107929	-0.342666	-0.279631	-0.205074				RBM19	ENSG00000122965	-0.120221	-0.235669	-0.406521				MRPL17	ENSG00000158042	-1.09192	0.379107	0.489822	-0.158936
	RPS12	ENSG00000112306	-0.00674259	-0.161009				WARS2	ENSG00000116874	-0.838354	-0.149416				SND1	ENSG00000197157	-0.240349	-0.46793				IFIT3	ENSG00000119917	-0.759366	-0.275741	-0.0318065				GFM2	ENSG00000164347	-0.271478	-0.230669	-0.815051				PES1	ENSG00000100029	-1.09476	0.320579	-0.143915	-0.199616
	LARP4	ENSG00000161813	-0.163683	-0.15964				YARS2	ENSG00000139131	-0.265708	-0.146418				POLR2J3	ENSG00000168255	-0.898523	-0.466911				PIWIL2	ENSG00000197181	-0.281135	-0.268712	-0.324332				SRSF7	ENSG00000115875	-0.0709131	-0.227459	-0.200518				PRPF19	ENSG00000110107	-1.09602	1.08022	-1.10333	-2.31913
	LARS2	ENSG00000011376	-0.243163	-0.15855				PCBP3	ENSG00000183570	-0.428894	-0.146				MRPL21	ENSG00000197345	-0.15933	-0.445122				TSFM	ENSG00000123297	-0.485862	-0.254456	-0.373414				EXOSC8	ENSG00000120699	-0.0247027	-0.227157	-0.560884				NOL3	ENSG00000140939	-1.10055	0.318418	0.283997	-0.15549
	PUS10	ENSG00000162927	-0.0339031	-0.15536				FASTKD1	ENSG00000138399	-0.0292988	-0.142485				FASTK	ENSG00000164896	-0.0979158	-0.421251				NXT2	ENSG00000101888	-0.704582	-0.253999	-0.368261				DUS3L	ENSG00000141994	-0.381834	-0.213708	-0.305271				TRIM21	ENSG00000132109	-1.13367	0.153396	0.141046	0.485648
	RPS6	ENSG00000137154	-0.279669	-0.150204				CNP	ENSG00000173786	-0.233538	-0.136234				NYNRIN	ENSG00000205978	-1.60865	-0.414316				SRSF7	ENSG00000115875	-0.155839	-0.242511	-0.594138				DROSHA	ENSG00000113360	-0.268338	-0.21359	-0.784471				GTPBP2	ENSG00000172432	-1.15321	0.319009	0.533084	0.721977
	RPS28	ENSG00000233927	-0.00836338	-0.148548				GLTSCR2	ENSG00000105373	-0.458006	-0.133427				RIOK1	ENSG00000124784	-0.101057	-0.368823				TRMT10C	ENSG00000174173	-0.253974	-0.242258	-0.571049				WDR5	ENSG00000196363	-0.556379	-0.213503	-0.799132				FBXO17	ENSG00000104835	-1.17416	1.0184	0.234914	-0.160158
	LUC7L	ENSG00000007392	-0.597509	-0.146838				QTRTD1	ENSG00000151576	-0.508649	-0.131102				PUS10	ENSG00000162927	-0.204139	-0.350259				GLE1	ENSG00000119392	-0.332945	-0.241994	-0.0259134				MRPS28	ENSG00000147586	-0.541706	-0.21148	-0.165632				DDX39A	ENSG00000123136	-1.17901	-1.90914	0.154322	0
	CD2BP2	ENSG00000169217	-0.186536	-0.13911				ZC3HAV1	ENSG00000105939	-0.0161167	-0.130212				TUT1	ENSG00000149016	-0.206152	-0.334159				ZC3H13	ENSG00000123200	-0.102103	-0.230005	-0.278431				REXO1	ENSG00000079313	-0.296196	-0.205335	-0.271593				MEX3D	ENSG00000181588	-1.18762	0.258651	-0.533977	-0.632476
	PET112	ENSG00000059691	-0.358338	-0.127899				RPS15A	ENSG00000134419	-0.24531	-0.122633				CNOT6	ENSG00000113300	-0.393038	-0.324609				DENR	ENSG00000139726	-0.411402	-0.229299	-0.504191				ZGPAT	ENSG00000197114	-0.664052	-0.20364	-0.509022				LSM5	ENSG00000106355	-1.20533	0.244292	0.163931	0.616509
	TSEN2	ENSG00000154743	-0.161089	-0.120844				YBX1	ENSG00000065978	-0.0806656	-0.117498				NOP56	ENSG00000101361	-0.700818	-0.314019				HNRNPAB	ENSG00000197451	-0.245506	-0.215807	-0.0941756				MRPS24	ENSG00000062582	-0.530211	-0.196751	-0.245747				JAKMIP1	ENSG00000152969	-1.22351	-1.58953	-0.997944	0.95793
	UPF2	ENSG00000151461	-0.128569	-0.113663				TRIT1	ENSG00000043514	-0.407529	-0.116495				MARS	ENSG00000166986	-0.526199	-0.296935				NMD3	ENSG00000169251	-0.139345	-0.210932	-0.744654				SERBP1	ENSG00000142864	-0.0506887	-0.192314	-0.590123				ZNF473	ENSG00000142528	-1.24969	-0.393046	-0.231769	0.486856
	WARS2	ENSG00000116874	-0.224921	-0.112496				RPL21	ENSG00000122026	-0.208447	-0.113978				PTBP3	ENSG00000119314	-0.374455	-0.295892				MRPL16	ENSG00000166902	-0.00117322	-0.196797	-0.290003				MVP	ENSG00000013364	-0.688993	-0.190619	-0.411388				ZC3H8	ENSG00000144161	-1.25612	0.919891	0.292933	-0.349657
	MRPL23	ENSG00000214026	-0.300492	-0.110343				PRPF38A	ENSG00000134748	-0.269843	-0.107849				YTHDF1	ENSG00000149658	-0.247445	-0.293715				STRBP	ENSG00000165209	-0.222434	-0.191923	-0.135114				EIF3CL	ENSG00000205609	-0.396971	-0.18338	-0.297541				INTS7	ENSG00000143493	-1.25694	0.337219	-0.559723	-0.642607
	MRP63	ENSG00000173141	-0.196299	-0.108376				RPS13	ENSG00000110700	-0.231521	-0.104325				EEFSEC	ENSG00000132394	-0.425053	-0.279808				MRPS35	ENSG00000061794	-0.604491	-0.181938	-0.548248				DDX31	ENSG00000125485	-0.367784	-0.181446	-0.703185				TARBP2	ENSG00000139546	-1.26126	0.144782	-0.281626	0.575046
	RPL5	ENSG00000122406	-0.194588	-0.0934314				UTP11L	ENSG00000183520	-0.0961465	-0.104124				MAZ	ENSG00000103495	-0.247643	-0.270566				SNRPG	ENSG00000143977	-0.557302	-0.180158	-0.612376				XPO1	ENSG00000082898	-0.352704	-0.176741	-0.657889				RAN	ENSG00000132341	-1.29748	0.074586	0.524548	-0.000733439
	RPS11	ENSG00000142534	-0.165672	-0.089458				NKRF	ENSG00000186416	-0.0136412	-0.103743				MAEL	ENSG00000143194	-2.39491	-0.266987				FASTKD5	ENSG00000215251	-0.278575	-0.16819	-0.044604				MRPS30	ENSG00000112996	-1.69195	-0.176456	-0.699045				CARS2	ENSG00000134905	-1.31659	0.0774998	-0.614121	-0.493807
	TNRC6A	ENSG00000090905	-0.214003	-0.0882902				LARP6	ENSG00000166173	-2.16037	-0.102878				PIWIL4	ENSG00000134627	-0.54572	-0.266054				HRSP12	ENSG00000132541	-0.0327116	-0.165239	-0.329437				LARP4	ENSG00000161813	-0.555281	-0.174084	-0.811828				DDX27	ENSG00000124228	-1.31705	0.618233	0.418154	0.565826
	RPS20	ENSG00000008988	-0.221072	-0.0877042				ADAT3	ENSG00000213638	-0.240199	-0.0989876				NUTF2	ENSG00000102898	-0.350714	-0.265921				PNLDC1	ENSG00000146453	-0.619697	-0.159149	-0.564997				APOBEC3H	ENSG00000100298	-1.04647	-0.160958	-1.96765				RNASE10	ENSG00000182545	-1.31967	0.124905	-0.442386	-0.544026
	PRPF6	ENSG00000101161	-0.29292	-0.0860182				EIF4A2	ENSG00000156976	-0.213082	-0.0920896				ZNFX1	ENSG00000124201	-0.368369	-0.250653				HTATSF1	ENSG00000102241	-0.298734	-0.142018	-0.260785				MRPS22	ENSG00000175110	-0.0879166	-0.156493	-0.814398				RPS11	ENSG00000142534	-1.32128	1.48168	0.296937	-0.313436
	JAKMIP1	ENSG00000152969	-1.10255	-0.0829253				RNASEK	ENSG00000219200	-0.52077	-0.0904248				XPO1	ENSG00000082898	-0.11073	-0.246464				FXR1	ENSG00000114416	-0.20882	-0.133479	-0.312001				IARS	ENSG00000196305	-0.530071	-0.154814	-0.471147				EIF5AL1	ENSG00000253626	-1.32448	-0.420491	-0.0785335	0.641018
	ENOX1	ENSG00000120658	-0.0348755	-0.0813564				EEF1G	ENSG00000254772	-0.569403	-0.0899195				ZNF598	ENSG00000167962	-0.564024	-0.239778				MTIF2	ENSG00000085760	-0.518175	-0.12316	-0.133225				RBM28	ENSG00000106344	-0.146273	-0.151502	-0.489647				BRIX1	ENSG00000113460	-1.32564	0.134718	-0.816765	-0.824314
	MRPL33	ENSG00000243147	-0.350187	-0.0769753				RPL41	ENSG00000229117	-0.553024	-0.084556				NSUN5	ENSG00000130305	-0.0602711	-0.235696				ERN1	ENSG00000178607	-0.0301769	-0.117984	-0.0202196				FTSJ3	ENSG00000108592	-0.527289	-0.141912	-0.255786				FBL	ENSG00000105202	-1.36929	0.64958	0.638488	0.914311
	SRSF7	ENSG00000115875	-0.00680262	-0.0750449				SPATS2L	ENSG00000196141	-0.250455	-0.0839042				RBMXL2	ENSG00000170748	-3.16299	-0.224484				MRPL32	ENSG00000106591	-0.0171273	-0.115618	-0.358597				EIF2S1	ENSG00000134001	-0.141675	-0.139679	-0.637057				DQX1	ENSG00000144045	-1.41916	0.677873	-0.452975	-0.559882
	SMAD5	ENSG00000113658	-0.102459	-0.059369				PNPT1	ENSG00000138035	-0.143938	-0.0833491				XPOT	ENSG00000184575	-0.450281	-0.221131				SMG1	ENSG00000157106	-0.458962	-0.109388	-0.102674				MRPL32	ENSG00000106591	-0.308687	-0.13415	-0.237922				PTRH2	ENSG00000141378	-1.42985	-0.660979	-0.237613	1.89558
	FAU	ENSG00000149806	-0.084864	-0.0571216				RBM38	ENSG00000132819	-0.761579	-0.0747089				SNRNP25	ENSG00000161981	-0.445756	-0.192071				C2orf15	ENSG00000241962	-0.729519	-0.101844	-0.394238				EEFSEC	ENSG00000132394	-0.349441	-0.126955	-0.352445				NOP56	ENSG00000101361	-1.43922	-0.918779	-0.813825	2.69642
	SRPR	ENSG00000182934	-0.336776	-0.0541001				YTHDF1	ENSG00000149658	-0.111868	-0.0664086				SAMD4A	ENSG00000020577	-0.43198	-0.174695				PARP1	ENSG00000143799	-0.578478	-0.0977494	-0.37002				WDR43	ENSG00000163811	-0.118033	-0.125648	-0.691548				WDR4	ENSG00000160193	-1.4524	0.636917	-2.32557	0.580416
	RNASET2	ENSG00000026297	-0.623256	-0.0538493				UPF2	ENSG00000151461	-0.140541	-0.0663239				CTU2	ENSG00000174177	-0.103798	-0.172552				GSPT1	ENSG00000103342	-0.1798	-0.0971956	-0.331913				TNPO2	ENSG00000105576	-0.184188	-0.122635	-0.087178				EXOSC2	ENSG00000130713	-1.4561	1.11592	-0.00888215	-0.0719902
	FRG1B	ENSG00000149531	-0.17231	-0.0536956				KHDRBS2	ENSG00000112232	-0.409328	-0.0621644				POLR2I	ENSG00000105258	-0.522231	-0.165724				RBM34	ENSG00000188739	-0.591861	-0.0936663	-0.0934336				UTP11L	ENSG00000183520	-0.289467	-0.113581	-0.339777				MEX3B	ENSG00000183496	-1.46099	0.0184817	-0.412806	-0.299594
	RPL3	ENSG00000100316	-0.13389	-0.0503081				TLR7	ENSG00000196664	-1.15935	-0.0600351				NCBP1	ENSG00000136937	-0.545887	-0.144351				MRPL19	ENSG00000115364	-0.346665	-0.0927635	-0.339308				GFM1	ENSG00000168827	-0.286389	-0.0937805	-0.971675				RANBP17	ENSG00000204764	-1.48113	0.184862	-0.27503	0.0655442
	RPL29	ENSG00000162244	-0.464891	-0.049252				RPL34	ENSG00000109475	-0.0373076	-0.0455286				RBPMS2	ENSG00000166831	-0.438443	-0.143802				SERBP1	ENSG00000142864	-0.13225	-0.0874517	-0.285488				TRIT1	ENSG00000043514	-0.200796	-0.0911615	-0.15679				MRPL36	ENSG00000171421	-1.5541	1.79115	0.451992	2.00471
	MATR3	ENSG00000015479	-0.384873	-0.0470046				REXO2	ENSG00000076043	-0.104416	-0.0402455				KHDC1	ENSG00000135314	-4.2258	-0.113352				MRPL13	ENSG00000172172	-0.517984	-0.0709779	-0.450784				NOM1	ENSG00000146909	-0.0811893	-0.0778401	-0.57692				EXOSC4	ENSG00000178896	-1.56179	-0.0831255	-1.81016	3.47983
	R3HDM2	ENSG00000179912	-0.0867851	-0.0355258				ERI1	ENSG00000104626	-0.207226	-0.03539				SBDS	ENSG00000126524	-0.381772	-0.112918				EIF2S1	ENSG00000134001	-0.181272	-0.0576254	-0.462841				MSI2	ENSG00000153944	-0.9908	-0.0725657	-0.64731				NIFK	ENSG00000155438	-1.57528	-0.425738	0.00881671	2.36794
	CARS2	ENSG00000134905	-0.0980632	-0.0322782				RBMS2	ENSG00000076067	-2.00889	-0.0267932				UBAP2L	ENSG00000143569	-0.0506522	-0.10413				MRPL47	ENSG00000136522	-0.543869	-0.0570522	-0.323311				BZW1	ENSG00000082153	-0.485942	-0.0705789	-0.65978				VARS2	ENSG00000137411	-1.57674	0.495674	0.84119	0.00251042
	NSUN4	ENSG00000117481	-0.186515	-0.030935				SNRNP40	ENSG00000060688	-0.143725	-0.0243033				LUC7L	ENSG00000007392	-0.286585	-0.101575				CRYZ	ENSG00000116791	-0.126616	-0.0397069	-0.439133				EXOSC2	ENSG00000130713	-0.298235	-0.0620006	-0.653805				TARBP1	ENSG00000059588	-1.63195	-1.32751	-1.22131	0.427533
	OAS3	ENSG00000111331	-0.883561	-0.0308004				IPO5	ENSG00000065150	-0.231345	-0.019217				ZNF579	ENSG00000218891	-0.745709	-0.0891717				RPL39	ENSG00000198918	-0.125486	-0.0323218	-0.366707				HBS1L	ENSG00000112339	-0.20172	-0.0590259	-0.253368				EFTUD2	ENSG00000108883	-2.07098	0.0432191	1.02825	3.7169
	TRNAU1AP	ENSG00000180098	-0.528795	-0.0267081				PARP4	ENSG00000102699	-0.399515	-0.0183091				SMAD9	ENSG00000120693	-2.80959	-0.0603388				CNP	ENSG00000173786	-0.0109386	-0.0322722	-0.0249526				FBLL1	ENSG00000188573	-0.843709	-0.0581992	-0.196009				PUSL1	ENSG00000169972	-2.11098	0.177931	-0.398659	-2.98686
	NOVA1	ENSG00000139910	-1.22219	-0.0265981				DZIP1	ENSG00000134874	-2.56145	-0.0101698				FASTKD1	ENSG00000138399	-0.251232	-0.0550561				GEMIN2	ENSG00000092208	-0.430901	-0.0246132	-0.440392				UTP14A	ENSG00000156697	-0.386587	-0.0521265	-0.383554				POP1	ENSG00000104356	-2.11872	0.845542	0.204664	-0.566142
	RPS13	ENSG00000110700	-0.101317	-0.0184529				XPO4	ENSG00000132953	-0.0569227	-0.00822355				GEMIN8	ENSG00000046647	-0.311872	-0.0440368				ERI1	ENSG00000104626	-0.969777	-0.0225248	-0.560362				U2SURP	ENSG00000163714	-0.0158419	-0.0414539	-0.981025				CPSF4L	ENSG00000187959	-2.18755	-1.30864	1.12248	-1.21127
	RPL32	ENSG00000144713	-0.263796	-0.00119126				PRPF4	ENSG00000136875	-0.0828554	-0.0069719				ZNF768	ENSG00000169957	-0.154677	-0.0411325				INTS9	ENSG00000104299	-0.230436	-0.0113285	-0.0705158				AGO2	ENSG00000123908	-0.193659	-0.0331997	-0.205059				U2SURP	ENSG00000163714	-2.40993	-1.19853	-0.377965	0.668804
	APOBEC1	ENSG00000111701	-4.79	0				ZC3H12B	ENSG00000102053	-0.857041	-0.000673467				CXorf23	ENSG00000173681	-0.638306	-0.0243678				PDE12	ENSG00000174840	-0.0535333	-0.00771796	-0.110655				DDX60L	ENSG00000181381	-0.437267	-0.032064	-1.06447				THOC3	ENSG00000051596	-2.96058	-1.26468	-1.3632	0.259226
