# Supplementary material for: The co-expression networks of differentially expressed RBPs with TFs and LncRNAs related to clinical TNM stages of cancers
Source: PeerJ. 2019 Sep 17;7:e7696. doi: 10.7717/peerj.7696 (PMC6753928; doi:10.7717/peerj.7696)
Supplement: Table S3 [file peerj-07-7696-s010.xlsx]

## Sheet: CHOL_M
geneId	geneSymbol	geneBiotype	moduleColor	GS.stage_tnm_M	p.GS.stage_tnm_M	MM.red	p.MM.red	MM.orange	p.MM.orange
ENSG00000137090	DMRT1	protein_coding	green	0.579605	0.00191457	0.1413	0.491124	-0.0281923	0.89126
ENSG00000214510	SPINK13	protein_coding	green	0.619464	0.000739145	0.241644	0.234333	-0.0387509	0.85092
ENSG00000233532	LINC00460	lncRNA	green	0.641066	0.000417476	0.16199	0.429172	0.0408733	0.842852
ENSG00000182389	CACNB4	protein_coding	green	0.601556	0.00115108	0.180554	0.377422	0.00572108	0.977872
ENSG00000238283	TBC1D3P1	transcribed_unprocessed_pseudogene	green	0.551303	0.00350935	0.0989431	0.630599	-0.0342289	0.868158
ENSG00000152592	DMP1	protein_coding	green	0.554251	0.00330279	0.099837	0.627499	-0.0207708	0.919779
ENSG00000223949	ROR1-AS1	lncRNA	green	0.552738	0.00340743	0.084956	0.679874	-0.0228694	0.911703
ENSG00000235897	TM4SF19-AS1	lncRNA	green	0.663606	0.000219252	0.233577	0.250799	0.117138	0.568757
ENSG00000274150	FADS2P1	unprocessed_pseudogene	green	0.601634	0.00114893	0.216371	0.28839	-0.0303553	0.882971
ENSG00000226926	PDZPH1P	transcribed_unitary_pseudogene	green	0.52745	0.0056226	0.0544373	0.791687	-0.0207961	0.919681
ENSG00000147614	ATP6V0D2	protein_coding	green	0.540533	0.00435997	0.0889893	0.665522	-0.0481317	0.815382
ENSG00000186073	C15orf41	protein_coding	green	0.589418	0.00153184	0.175892	0.390068	0.0245854	0.905106
ENSG00000259732	AC092757.2	lncRNA	green	0.599529	0.00120831	0.253633	0.211211	0.0471905	0.818932
ENSG00000178568	ERBB4	protein_coding	green	0.499515	0.00937326	0.0987469	0.631281	-0.036153	0.860816
ENSG00000248757	LINC02115	lncRNA	green	0.56802	0.00246946	0.0505801	0.806161	0.10032	0.625827
ENSG00000253671	AC027117.1	lncRNA	green	0.470076	0.015383	0.0561254	0.785373	0.0352068	0.864425
ENSG00000146166	LGSN	protein_coding	green	0.500557	0.00920302	0.0595711	0.772526	-0.0785593	0.702858
ENSG00000177138	FAM9B	protein_coding	green	0.497527	0.00970512	0.0168197	0.935004	-0.044016	0.830934
ENSG00000243137	PSG4	protein_coding	green	0.502225	0.00893612	0.0569907	0.782141	-0.0266803	0.897061
ENSG00000234215	AC006012.1	lncRNA	green	0.534998	0.00486121	0.257833	0.203491	-0.0985348	0.632018
ENSG00000161249	DMKN	protein_coding	green	0.664553	0.000213154	0.424577	0.0306243	0.0289311	0.888428
ENSG00000086570	FAT2	protein_coding	green	0.515297	0.00705906	0.0749195	0.716052	0.150944	0.461703
ENSG00000147509	RGS20	protein_coding	green	0.485853	0.011858	0.0302423	0.883404	0.0280397	0.891845
ENSG00000152527	PLEKHH2	protein_coding	green	0.662638	0.000225647	0.274464	0.174814	0.114703	0.576876
ENSG00000107518	ATRNL1	protein_coding	green	0.514476	0.0071663	0.0112593	0.956466	0.0537202	0.794373
ENSG00000176595	KBTBD11	protein_coding	green	0.451779	0.020508	0.155653	0.447678	-0.156091	0.446387
ENSG00000237223	SULT1C2P1	transcribed_unprocessed_pseudogene	green	0.540678	0.00434752	0.134567	0.512207	-0.0199682	0.922869
ENSG00000105409	ATP1A3	protein_coding	green	0.716056	3.89776e-05	0.513449	0.00730241	-0.090858	0.658911
ENSG00000157470	FAM81A	protein_coding	green	0.64479	0.00037667	0.416962	0.034079	-0.0210529	0.918693
ENSG00000249346	LINC01016	lncRNA	green	0.448001	0.0217227	0.120296	0.55831	-0.0626721	0.761015
ENSG00000147697	GSDMC	protein_coding	green	0.56304	0.00274726	0.212466	0.29739	-0.0451274	0.826728
ENSG00000128487	SPECC1	protein_coding	green	0.627601	0.000598994	0.276328	0.171787	0.175458	0.391255
ENSG00000241634	AC069499.1	processed_pseudogene	green	0.407783	0.0386496	0.0753337	0.714547	-0.0648359	0.753011
ENSG00000176933	TOB2P1	processed_pseudogene	green	0.685821	0.000110088	0.483027	0.0124346	0.174879	0.392845
ENSG00000226496	LINC00323	lncRNA	green	0.421376	0.0320405	0.114321	0.578151	-0.0890705	0.665235
ENSG00000226539	AC012512.1	processed_pseudogene	green	0.452794	0.0201914	0.0351169	0.864768	-0.0607517	0.768138
ENSG00000062485	CS	protein_coding	green	0.575331	0.00210533	0.375556	0.0586691	-0.0719374	0.726922
ENSG00000258777	HIF1A-AS1	lncRNA	green	0.57784	0.00199145	0.184188	0.367732	0.156301	0.445767
ENSG00000248685	LINC02484	lncRNA	green	0.455761	0.0192884	0.0517777	0.80166	-0.0849071	0.680049
ENSG00000260634	AC012508.2	lncRNA	green	0.616282	0.000801227	0.0226595	0.912511	0.249012	0.219933
ENSG00000237307	SRRM1P3	processed_pseudogene	green	0.467054	0.0161481	-0.0638671	0.756591	0.22392	0.271481
ENSG00000219607	PPP1R3G	protein_coding	green	0.696594	7.71373e-05	0.126267	0.538792	0.330344	0.0993046
ENSG00000113249	HAVCR1	protein_coding	green	0.410901	0.0370456	0.0419626	0.838718	-0.0128966	0.950142
ENSG00000165996	HACD1	protein_coding	green	0.564744	0.00264936	0.290424	0.150071	-0.0877893	0.669781
ENSG00000272396	AC005392.3	lncRNA	green	0.635505	0.000485599	0.253218	0.211985	0.0891604	0.664916
ENSG00000111716	LDHB	protein_coding	green	0.444102	0.023037	-0.0223543	0.913684	0.00276444	0.989307
ENSG00000147408	CSGALNACT1	protein_coding	green	0.521988	0.00623428	0.356937	0.0734518	0.101332	0.622328
ENSG00000168779	SHOX2	protein_coding	green	0.575566	0.0020944	0.447787	0.0217932	-0.149443	0.46622
ENSG00000199836	RNU1-47P	snRNA	green	0.41316	0.0359166	0.139289	0.497374	-0.0555593	0.787489
ENSG00000182199	SHMT2	protein_coding	green	0.459926	0.0180768	-0.0670392	0.744887	0.123716	0.547091
ENSG00000001626	CFTR	protein_coding	green	0.360018	0.070827	-0.0298624	0.884859	0.0132632	0.948727
ENSG00000112541	PDE10A	protein_coding	green	0.371695	0.061527	0.00830949	0.967864	-0.0989313	0.63064
ENSG00000225062	CATIP-AS1	lncRNA	green	0.569053	0.00241495	0.233914	0.250097	0.047241	0.818742
ENSG00000204283	LINC01973	lncRNA	green	0.63972	0.000433155	0.591557	0.00145779	-0.0780994	0.704521
ENSG00000136999	NOV	protein_coding	green	0.35672	0.0736396	0.0182819	0.929366	-0.059524	0.772702
ENSG00000183171	BX322650.1	processed_pseudogene	green	0.542519	0.0041912	0.238264	0.241142	0.0518186	0.801507
ENSG00000182240	BACE2	protein_coding	green	0.328602	0.101208	0.178031	0.384235	-0.177832	0.384776
ENSG00000086717	PPEF1	protein_coding	green	0.547649	0.00378054	0.202413	0.321362	0.0247279	0.904558
ENSG00000167363	FN3K	protein_coding	green	0.410222	0.0373902	0.0110603	0.957234	-0.0176428	0.93183
ENSG00000072832	CRMP1	protein_coding	green	0.599044	0.00122235	0.344322	0.0849825	0.264269	0.192036
ENSG00000229886	AC068533.2	processed_pseudogene	green	0.468087	0.0158831	0.0465785	0.821243	0.00649119	0.974894
ENSG00000121903	ZSCAN20	protein_coding	green	0.470667	0.0152371	0.149847	0.465001	0.0234914	0.909311
ENSG00000260088	AL445483.1	lncRNA	green	0.707747	5.25111e-05	0.603916	0.00108742	-0.104517	0.611368
ENSG00000117148	ACTL8	protein_coding	green	0.410662	0.0371667	-0.00137945	0.994664	-0.0743701	0.718051
ENSG00000112208	BAG2	protein_coding	green	0.548397	0.00372364	0.269406	0.183219	-0.0263453	0.898347
ENSG00000106013	ANKRD7	protein_coding	green	0.460633	0.0178773	0.0999871	0.62698	0.154272	0.451768
ENSG00000106683	LIMK1	protein_coding	green	0.406989	0.039067	0.116575	0.57063	-0.170787	0.404184
ENSG00000246022	ALDH1L1-AS2	lncRNA	green	0.312842	0.119687	0.00741926	0.971306	-0.0675169	0.743129
ENSG00000157833	GAREM2	protein_coding	green	0.763109	5.79906e-06	0.353298	0.0766477	0.231117	0.255968
ENSG00000205309	NT5M	protein_coding	green	0.622124	0.000690486	0.347695	0.0817736	0.13433	0.512956
ENSG00000157827	FMNL2	protein_coding	green	0.391384	0.048018	-0.0324546	0.874938	0.0653797	0.751003
ENSG00000132470	ITGB4	protein_coding	green	0.448365	0.0216031	0.182843	0.371301	0.0385422	0.851715
ENSG00000230894	AL133284.1	lncRNA	green	0.75597	7.95323e-06	0.364537	0.067108	0.341863	0.087382
ENSG00000163576	EFHB	protein_coding	green	0.382434	0.0538356	0.0616524	0.764795	0.00693509	0.973178
ENSG00000204933	CD177P1	unprocessed_pseudogene	green	0.65479	0.00028382	0.348052	0.0814397	0.122866	0.549867
ENSG00000115295	CLIP4	protein_coding	green	0.455465	0.019377	-0.00588013	0.977257	0.173713	0.396059
ENSG00000204941	PSG5	protein_coding	green	0.706159	5.55243e-05	0.0780734	0.704615	0.475159	0.014164
ENSG00000156535	CD109	protein_coding	green	0.403451	0.0409697	0.0270608	0.895601	0.0357672	0.862287
ENSG00000183929	DUSP5P1	processed_pseudogene	green	0.434939	0.0263811	0.232002	0.254099	-0.00129771	0.99498
ENSG00000266750	MIR4645	miRNA	green	0.475793	0.0140176	-0.0176325	0.931869	0.227237	0.264258
ENSG00000268521	VN1R83P	unprocessed_pseudogene	green	0.417685	0.0337382	0.351732	0.0780553	-0.0172096	0.9335
ENSG00000197891	SLC22A12	protein_coding	green	0.43275	0.0272351	0.0273484	0.894497	-0.0813147	0.692925
ENSG00000224081	SLC44A3-AS1	transcribed_processed_pseudogene	green	0.279832	0.166194	-0.062433	0.761901	-0.0808438	0.694619
ENSG00000127948	POR	protein_coding	green	0.447392	0.0219238	0.313333	0.119076	-0.251688	0.214852
ENSG00000271547	AC117498.3	processed_pseudogene	green	0.715939	3.91439e-05	0.563829	0.00270152	0.102168	0.619443
ENSG00000110851	PRDM4	protein_coding	green	0.54512	0.00397846	0.404197	0.0405626	0.00101996	0.996054
ENSG00000137404	NRM	protein_coding	green	0.578765	0.00195082	0.280239	0.165553	0.171504	0.402183
ENSG00000135253	KCP	protein_coding	green	0.535781	0.00478752	-0.0291054	0.88776	0.252189	0.21391
ENSG00000198039	ZNF273	protein_coding	green	0.592974	0.00141045	0.539848	0.00441951	-0.157048	0.443568
ENSG00000257647	AC124312.2	lncRNA	green	0.498279	0.0095784	0.154928	0.449825	0.214425	0.292855
ENSG00000182379	NXPH4	protein_coding	green	0.426897	0.0296297	0.160946	0.432191	-0.0863529	0.674891
ENSG00000188211	NCR3LG1	protein_coding	green	0.806086	6.67569e-07	0.575176	0.00211254	0.229749	0.258871
ENSG00000150967	ABCB9	protein_coding	green	0.516895	0.00685418	0.0504664	0.806589	0.148269	0.46977
ENSG00000007062	PROM1	protein_coding	green	0.266969	0.187367	-0.0654857	0.750612	-0.0577715	0.779229
ENSG00000261502	AC040174.1	lncRNA	green	0.364623	0.0670384	0.0140204	0.945804	-0.0713079	0.729223
ENSG00000243335	KCTD7	protein_coding	green	0.511028	0.00763176	0.320877	0.10998	0.0415972	0.840104
ENSG00000111412	C12orf49	protein_coding	green	0.451193	0.0206926	0.156845	0.444165	0.186422	0.361848
ENSG00000110063	DCPS	protein_coding	green	0.28397	0.159756	0.00756312	0.97075	-0.116538	0.570752
ENSG00000267069	AP005264.1	lncRNA	green	0.438562	0.0250149	0.117528	0.567461	0.0842512	0.682393
ENSG00000072840	EVC	protein_coding	green	0.480083	0.01306	0.368801	0.0637379	0.18695	0.360465
ENSG00000241962	AC079447.1	protein_coding	green	0.297679	0.139691	-0.0915789	0.656367	-0.0251962	0.902759
ENSG00000272899	AC025594.2	protein_coding	green	0.480081	0.0130605	-0.0284461	0.890287	0.128419	0.531837
ENSG00000130270	ATP8B3	protein_coding	green	0.872358	6.34003e-09	0.604776	0.001065	0.296124	0.141871
ENSG00000239670	AL355864.2	unprocessed_pseudogene	green	0.307794	0.126098	-0.144662	0.48076	-0.0628882	0.760214
ENSG00000188372	ZP3	protein_coding	green	0.331104	0.098482	0.0385832	0.851559	-0.0474407	0.817988
ENSG00000075391	RASAL2	protein_coding	green	0.574919	0.00212453	0.558817	0.00300331	0.147504	0.472089
ENSG00000279205	AC092162.3	TEC	green	0.310795	0.122258	0.0616443	0.764825	-0.0866681	0.673768
ENSG00000163071	SPATA18	protein_coding	green	0.753305	8.92447e-06	0.179561	0.380095	0.426016	0.0300039
ENSG00000149925	ALDOA	protein_coding	green	0.577802	0.00199315	0.150546	0.462898	0.0440327	0.830871
ENSG00000006282	SPATA20	protein_coding	green	0.502497	0.00889319	0.100607	0.624835	0.125833	0.5402
ENSG00000044090	CUL7	protein_coding	green	0.495009	0.0101395	0.170492	0.405008	0.171819	0.401308
ENSG00000169435	RASSF6	protein_coding	green	0.307538	0.12643	-0.124073	0.545926	-0.0309472	0.880705
ENSG00000260657	AC107871.2	lncRNA	green	0.381816	0.0542571	0.123671	0.547238	-0.109122	0.595671
ENSG00000146005	PSD2	protein_coding	green	0.422727	0.0314365	0.158725	0.438654	-0.0661583	0.748132
ENSG00000148123	PLPPR1	protein_coding	green	0.301544	0.134378	0.0908112	0.659077	-0.112242	0.585131
ENSG00000029559	IBSP	protein_coding	green	0.350352	0.0793111	0.0405391	0.844122	-0.0480803	0.815575
ENSG00000173838	MARCH10	protein_coding	green	0.539545	0.00444615	0.194754	0.340394	0.301005	0.135111
ENSG00000279858	AC068880.4	TEC	green	0.352134	0.077692	0.0306436	0.881868	0.0205034	0.920808
ENSG00000143369	ECM1	protein_coding	green	0.380527	0.0551439	0.000350803	0.998643	0.0362947	0.860276
ENSG00000197106	SLC6A17	protein_coding	green	0.367248	0.0649503	-0.0137649	0.94679	-0.0991116	0.630015
ENSG00000107551	RASSF4	protein_coding	green	0.311884	0.120885	0.223654	0.272066	-0.0927582	0.652214
ENSG00000225298	LINC00113	lncRNA	green	0.303152	0.132212	-0.0304956	0.882434	-0.0405743	0.843988
ENSG00000226756	AC007365.1	lncRNA	green	0.456825	0.0189726	0.0726897	0.724175	0.210351	0.302339
ENSG00000177679	SRRM3	protein_coding	green	0.515473	0.00703632	0.298458	0.138608	-0.05986	0.771452
ENSG00000244515	KRT18P34	processed_pseudogene	green	0.343985	0.0853091	0.114237	0.578435	-0.117128	0.568792
ENSG00000124523	SIRT5	protein_coding	green	0.479991	0.01308	0.477635	0.0135996	-0.0417086	0.839681
ENSG00000204188	GGNBP1	transcribed_unitary_pseudogene	green	0.757125	7.56247e-06	0.665245	0.000208786	0.0929864	0.651412
ENSG00000203724	C1orf53	protein_coding	green	0.520592	0.00639933	0.411868	0.0365589	0.0373208	0.856365
ENSG00000104213	PDGFRL	protein_coding	green	0.288517	0.152888	0.0529729	0.797174	-0.0698861	0.734429
ENSG00000188981	MSANTD1	protein_coding	green	0.378993	0.0562132	0.071891	0.727091	-0.0746988	0.716855
ENSG00000122133	PAEP	protein_coding	green	0.305703	0.128826	-0.0354482	0.863504	-0.0545589	0.791231
ENSG00000258857	AL359397.1	lncRNA	green	0.30933	0.124121	-0.0455462	0.825144	-0.101425	0.622006
ENSG00000116176	TPSG1	protein_coding	green	0.319898	0.11113	0.0424174	0.836992	-0.0845066	0.68148
ENSG00000240625	RN7SL403P	misc_RNA	green	0.357178	0.0732441	-0.059398	0.77317	0.0870922	0.672259
ENSG00000130821	SLC6A8	protein_coding	green	0.350382	0.0792844	0.0256433	0.901042	-0.127273	0.535536
ENSG00000272620	AFAP1-AS1	lncRNA	green	0.35349	0.0764769	0.236785	0.244163	0.0619324	0.763756
ENSG00000106526	ACTR3C	protein_coding	green	0.363424	0.0680101	0.0429157	0.835103	0.0154497	0.940288
ENSG00000183098	GPC6	protein_coding	green	0.355244	0.0749261	0.161728	0.429929	-0.066769	0.745882
ENSG00000175711	B3GNTL1	protein_coding	green	0.401106	0.0422711	0.273781	0.175934	-0.0324838	0.874827
ENSG00000224812	TMEM72-AS1	lncRNA	green	0.283081	0.161123	0.185438	0.364433	-0.0424535	0.836855
ENSG00000261069	AC124312.3	lncRNA	green	0.510782	0.00766583	0.25145	0.215301	0.245651	0.226425
ENSG00000270773	AC137695.2	processed_pseudogene	green	0.163653	0.424384	0.0431105	0.834365	-0.114864	0.576337
ENSG00000235314	LINC00957	lncRNA	green	0.385397	0.0518516	0.0712454	0.729452	0.0195851	0.924345
ENSG00000228271	LINC02048	lncRNA	green	0.549283	0.00365715	0.18374	0.368919	0.0911738	0.657796
ENSG00000274444	AC078909.2	lncRNA	green	0.424598	0.0306149	0.317068	0.114506	-0.014724	0.943088
ENSG00000277144	AC092757.3	lncRNA	green	0.486856	0.0116586	0.13439	0.512768	0.210931	0.300978
ENSG00000182752	PAPPA	protein_coding	green	0.351489	0.0782753	-0.0774945	0.70671	0.0375289	0.855572
ENSG00000225791	TRAM2-AS1	lncRNA	green	0.316512	0.115179	0.114208	0.578532	0.00528577	0.979555
ENSG00000241770	AC104411.1	lncRNA	green	0.386906	0.0508637	0.232016	0.254071	-0.10883	0.596661
ENSG00000205794	AC098591.1	transcribed_processed_pseudogene	green	0.255794	0.207214	0.15038	0.463397	-0.110365	0.591459
ENSG00000230438	SERPINB9P1	lncRNA	green	0.48092	0.0128796	0.0644417	0.754467	0.261827	0.19633
ENSG00000275703	U47924.3	lncRNA	green	0.392727	0.0471896	-0.0320762	0.876385	0.182032	0.373463
ENSG00000134138	MEIS2	protein_coding	green	0.594561	0.001359	0.618606	0.000755455	-0.0533417	0.795791
ENSG00000237974	AC000111.2	processed_pseudogene	green	0.245317	0.227078	-0.104961	0.60985	-0.0545502	0.791264
ENSG00000205336	ADGRG1	protein_coding	green	0.726554	2.63488e-05	0.403146	0.0411375	0.411459	0.036764
ENSG00000129667	RHBDF2	protein_coding	green	0.467299	0.0160848	0.38017	0.0553913	-0.0403938	0.844674
ENSG00000139445	FOXN4	protein_coding	green	0.280897	0.16452	0.0276919	0.893179	-0.106122	0.605878
ENSG00000260658	AC138305.1	lncRNA	green	0.238196	0.241281	-0.0176522	0.931793	-0.120216	0.558572
ENSG00000254987	AP002989.1	lncRNA	green	0.208009	0.307876	-0.100634	0.624741	-0.071131	0.72987
ENSG00000115226	FNDC4	protein_coding	green	0.629961	0.000562947	0.206091	0.312459	0.419173	0.0330451
ENSG00000267426	AC087289.3	protein_coding	green	0.314654	0.117445	-0.0146951	0.9432	-0.0695434	0.735685
ENSG00000115112	TFCP2L1	protein_coding	green	0.476043	0.0139602	0.315295	0.116659	-0.00199373	0.992288
ENSG00000131730	CKMT2	protein_coding	green	0.322255	0.108376	0.0470744	0.819371	-0.045419	0.825625
ENSG00000108639	SYNGR2	protein_coding	green	0.182049	0.373418	-0.0210488	0.918709	-0.254397	0.209792
ENSG00000144550	CPNE9	protein_coding	green	0.644288	0.000381953	0.366936	0.0651954	0.198948	0.32989
ENSG00000111671	SPSB2	protein_coding	green	0.320397	0.110543	-0.246901	0.223997	0.117722	0.56682
ENSG00000035862	TIMP2	protein_coding	green	0.371375	0.0617686	-0.0232559	0.910217	0.271781	0.179238
ENSG00000228510	AL359091.1	processed_pseudogene	green	0.280836	0.164616	0.183459	0.369665	-0.14846	0.46919
ENSG00000196502	SULT1A1	protein_coding	green	0.612806	0.000874166	0.106858	0.603365	0.473368	0.0145842
ENSG00000167766	ZNF83	protein_coding	green	0.387293	0.0506124	0.167688	0.412892	-0.0243303	0.906086
ENSG00000136425	CIB2	protein_coding	green	0.385476	0.0517998	0.106593	0.604272	0.0389359	0.850217
ENSG00000002079	MYH16	transcribed_unitary_pseudogene	green	0.487226	0.0115858	0.109206	0.595386	0.144714	0.480602
ENSG00000115919	KYNU	protein_coding	green	0.621645	0.000699037	-0.0408906	0.842787	0.619797	0.000732896
ENSG00000223392	CLDN10-AS1	lncRNA	green	0.377774	0.0570748	-0.0198678	0.923256	0.140263	0.494343
ENSG00000180044	C3orf80	protein_coding	green	0.253007	0.21238	-0.0173423	0.932988	0.181915	0.373777
ENSG00000182952	HMGN4	protein_coding	green	0.461032	0.0177657	0.398953	0.0434942	0.11943	0.561166
ENSG00000131473	ACLY	protein_coding	green	0.525453	0.00584008	0.317838	0.11358	0.193994	0.342319
ENSG00000115041	KCNIP3	protein_coding	green	0.213084	0.295955	-0.0239138	0.907687	-0.10817	0.5989
ENSG00000152556	PFKM	protein_coding	green	0.536497	0.00472093	0.31547	0.116445	0.125379	0.541674
ENSG00000239377	AC073111.1	lncRNA	green	0.560984	0.00286946	0.541124	0.0043092	0.115472	0.574307
ENSG00000171060	C8orf74	protein_coding	green	0.310537	0.122585	-0.059455	0.772958	0.189354	0.35421
ENSG00000225511	LINC00475	lncRNA	green	0.64721	0.000352054	0.0287361	0.889175	0.521794	0.006257
ENSG00000269985	AL021328.1	lncRNA	green	0.432772	0.0272264	0.310346	0.122826	-0.103746	0.614015
ENSG00000102034	ELF4	protein_coding	green	0.344987	0.0843426	0.0650217	0.752325	0.00166551	0.993557
ENSG00000204052	LRRC73	protein_coding	green	0.347244	0.0821976	0.0460873	0.823099	-0.102442	0.618498
ENSG00000262172	AC116025.2	lncRNA	green	0.579318	0.00192687	0.233036	0.251929	0.308745	0.124872
ENSG00000233183	AL138889.1	lncRNA	green	0.273303	0.176719	-0.00652941	0.974746	-0.0955909	0.64228
ENSG00000131711	MAP1B	protein_coding	green	0.259685	0.200147	-0.00266888	0.989676	-0.0788717	0.70173
ENSG00000169515	CCDC8	protein_coding	green	0.456697	0.0190104	0.265799	0.189381	-0.0838638	0.68378
ENSG00000250282	AC002401.2	lncRNA	green	0.244361	0.228952	-0.0596272	0.772318	-0.0403854	0.844706
ENSG00000116883	AL591845.1	lncRNA	green	0.255806	0.207193	-0.0335662	0.870689	-0.0373686	0.856183
ENSG00000240370	RPL13P5	transcribed_processed_pseudogene	green	0.480665	0.0129343	-0.0604161	0.769385	0.546059	0.00390401
ENSG00000254966	AC103974.1	lncRNA	green	0.212226	0.297951	-0.0270297	0.89572	-0.0911969	0.657715
ENSG00000257062	AC022335.1	protein_coding	green	0.265167	0.190475	0.00461333	0.982156	0.0472524	0.818699
ENSG00000008394	MGST1	protein_coding	green	0.384804	0.0522445	-0.0312325	0.879613	0.247647	0.222554
ENSG00000164778	EN2	protein_coding	green	0.196987	0.334777	-0.0254342	0.901845	-0.0433684	0.833387
ENSG00000154240	CEP112	protein_coding	green	0.537152	0.00466066	0.21161	0.299388	0.360319	0.0705747
ENSG00000257151	PWAR6	lncRNA	green	0.377062	0.0575834	0.0139774	0.94597	0.238273	0.241123
ENSG00000260196	AC124798.1	lncRNA	green	0.666215	0.000202806	0.311151	0.121807	0.241108	0.235403
ENSG00000146267	FAXC	protein_coding	green	0.255831	0.207146	0.0161168	0.937714	0.163785	0.424006
ENSG00000159202	UBE2Z	protein_coding	green	0.3165	0.115192	0.043806	0.83173	0.175384	0.391459
ENSG00000236683	HMGA1P1	processed_pseudogene	green	0.654084	0.00028964	0.353911	0.0761019	0.386779	0.0509465
ENSG00000122643	NT5C3A	protein_coding	green	0.241538	0.234543	-0.00514702	0.980092	-0.191705	0.348154
ENSG00000229020	AKR7A2P1	processed_pseudogene	green	0.198337	0.331409	-0.0751893	0.715071	-0.0796693	0.698851
ENSG00000137171	KLC4	protein_coding	green	0.364634	0.0670301	-0.0957447	0.641742	0.159116	0.437515
ENSG00000169710	FASN	protein_coding	green	0.360772	0.0701963	0.138028	0.501313	0.0588967	0.775036
ENSG00000139055	ERP27	protein_coding	green	0.481039	0.0128542	0.469067	0.0156351	-0.126444	0.538219
ENSG00000158578	ALAS2	protein_coding	green	0.514991	0.00709888	-0.149711	0.465411	0.511539	0.00756115
ENSG00000270822	AC092032.1	processed_pseudogene	green	0.3214	0.109369	0.298985	0.137879	-0.141538	0.490386
ENSG00000256894	AC022509.3	lncRNA	green	0.36648	0.0655556	0.253416	0.211615	0.0117049	0.954744
ENSG00000232677	LINC00665	lncRNA	green	0.374063	0.0597615	0.274345	0.17501	-0.00137542	0.994679
ENSG00000227051	C14orf132	protein_coding	green	0.226173	0.266562	0.157436	0.442431	-0.0216513	0.916389
ENSG00000270246	NA	NA	green	0.428274	0.0290516	0.249018	0.219922	0.223658	0.272059
ENSG00000131944	FAAP24	protein_coding	green	0.590907	0.00147996	0.389754	0.0490394	-0.000632769	0.997552
ENSG00000130711	PRDM12	protein_coding	green	0.233262	0.251457	0.106886	0.603271	-0.0885698	0.66701
ENSG00000243678	NME2	protein_coding	green	0.237688	0.242316	-0.0107506	0.958431	-0.102329	0.618889
ENSG00000226711	FAM66C	lncRNA	green	0.549408	0.00364786	0.404218	0.0405511	0.207684	0.308651
ENSG00000255422	AP002954.1	lncRNA	green	0.113218	0.581851	-0.0459571	0.823591	-0.204705	0.315796
ENSG00000270919	AC108451.2	lncRNA	green	0.298451	0.138619	0.358585	0.0720388	-0.150811	0.462103
ENSG00000279069	AC015813.5	TEC	green	0.398493	0.0437592	0.199546	0.328409	0.227143	0.264462
ENSG00000107562	CXCL12	protein_coding	green	0.164099	0.423107	-0.0600348	0.770802	-0.129089	0.529681
ENSG00000159251	ACTC1	protein_coding	green	0.327179	0.102783	0.058169	0.777747	-0.016941	0.934535
ENSG00000139800	ZIC5	protein_coding	green	0.452035	0.0204277	0.285599	0.157271	0.0338401	0.869643
ENSG00000050344	NFE2L3	protein_coding	green	0.185871	0.363294	0.204793	0.315584	-0.141621	0.490129
ENSG00000228445	UGT1A2P	unprocessed_pseudogene	green	0.286978	0.155188	-0.12496	0.543037	0.187929	0.357909
ENSG00000247809	NR2F2-AS1	lncRNA	green	0.226956	0.264866	-0.194441	0.341185	0.258616	0.202073
ENSG00000034053	APBA2	protein_coding	green	0.27514	0.173712	0.232507	0.253039	-0.170803	0.404139
ENSG00000227036	LINC00511	lncRNA	green	0.226608	0.265619	0.0962262	0.640059	0.0148657	0.942541
ENSG00000075618	FSCN1	protein_coding	green	0.210937	0.300962	0.0473752	0.818235	-0.231108	0.255985
ENSG00000224078	SNHG14	lncRNA	green	0.421104	0.0321631	0.13719	0.503942	0.348019	0.0814703
ENSG00000126603	GLIS2	protein_coding	green	0.28633	0.156165	0.172374	0.399765	0.093444	0.649804
ENSG00000163281	GNPDA2	protein_coding	green	0.371727	0.0615024	0.31651	0.11518	0.0555822	0.787403
ENSG00000251161	AC020661.1	lncRNA	green	0.285252	0.157797	0.101776	0.620797	0.0739818	0.719464
ENSG00000275529	SNORD116-4	snoRNA	green	0.43526	0.0262575	0.201997	0.32238	0.306499	0.127782
ENSG00000261143	ADAMTS7P3	transcribed_unprocessed_pseudogene	green	0.327669	0.102239	0.412802	0.0360937	-0.0996432	0.628171
ENSG00000184216	IRAK1	protein_coding	green	0.0929199	0.651645	-0.199949	0.327414	0.0395536	0.847868
ENSG00000116830	TTF2	protein_coding	green	0.470916	0.015176	0.269059	0.183805	0.154901	0.449903
ENSG00000279539	AC006486.2	TEC	green	0.247084	0.223641	0.304548	0.13035	-0.104167	0.612571
ENSG00000240230	COX19	protein_coding	green	0.236728	0.244278	0.209514	0.304311	-0.150816	0.462086
ENSG00000067601	PMS2P4	transcribed_unprocessed_pseudogene	green	0.0547292	0.790594	0.0442783	0.829941	-0.250703	0.216713
ENSG00000243056	EIF4EBP3	protein_coding	green	0.247921	0.222026	0.254295	0.209982	-0.104477	0.611507
ENSG00000067225	PKM	protein_coding	green	0.436151	0.0259174	0.250006	0.218037	0.0362334	0.86051
ENSG00000172927	MYEOV	protein_coding	green	0.229534	0.259329	-0.09028	0.660953	0.193664	0.343156
ENSG00000103528	SYT17	protein_coding	green	0.034521	0.867043	-0.0744058	0.717921	-0.251562	0.215091
ENSG00000248593	DSTNP2	transcribed_unprocessed_pseudogene	green	0.351262	0.0784809	-0.234364	0.249161	0.483065	0.0124268
ENSG00000158813	EDA	protein_coding	green	0.492886	0.0105183	0.238937	0.239776	0.194695	0.340544
ENSG00000178947	SMIM10L2A	protein_coding	green	0.0710708	0.73009	0.118028	0.565804	-0.301371	0.134613
ENSG00000182636	NDN	protein_coding	green	0.226667	0.26549	0.13363	0.515175	-0.0535746	0.794919
ENSG00000060138	YBX3	protein_coding	green	0.260552	0.198597	0.0689249	0.737955	0.147562	0.471913
ENSG00000237686	AL109615.3	lncRNA	green	0.452587	0.0202557	0.253375	0.211692	0.342197	0.0870532
ENSG00000172476	RAB40A	protein_coding	green	0.326783	0.103225	0.206584	0.311277	0.31881	0.112419
ENSG00000271882	AP001330.5	lncRNA	green	0.226661	0.265503	0.0174646	0.932517	0.0749821	0.715825
ENSG00000234405	Z69733.1	lncRNA	green	0.294868	0.14365	0.166345	0.416699	0.320603	0.110301
ENSG00000139178	C1RL	protein_coding	green	0.365526	0.0663142	0.199013	0.329729	0.356322	0.0739852
ENSG00000142959	BEST4	protein_coding	green	0.486326	0.0117636	0.0383892	0.852297	0.199287	0.329049
ENSG00000232387	SKA2P1	processed_pseudogene	green	0.140503	0.493596	0.0346245	0.866648	0.158905	0.438128
ENSG00000152433	ZNF547	protein_coding	green	-0.106118	0.605893	0.135899	0.508	0.159569	0.436192
ENSG00000146904	EPHA1	protein_coding	green	-0.461368	0.0176721	-0.120809	0.556617	-0.421898	0.0318058
ENSG00000183647	ZNF530	protein_coding	green	-0.0174891	0.932422	0.205042	0.314982	0.213862	0.294153
ENSG00000237423	LINC01522	lncRNA	orange	0.597762	0.00126015	0.0128957	0.950146	0.966972	9.39491e-16
ENSG00000156096	UGT2B4	protein_coding	orange	0.520325	0.00643134	-0.0369402	0.857815	0.955608	3.07933e-14
ENSG00000162040	HS3ST6	protein_coding	orange	0.502185	0.00894239	-0.013217	0.948905	0.948379	1.81326e-13
ENSG00000255741	AP000808.2	lncRNA	orange	0.44124	0.0240423	-0.0225085	0.913091	0.945739	3.25431e-13
ENSG00000170703	TTLL6	protein_coding	orange	0.550444	0.00357156	0.009907	0.96169	0.938599	1.38207e-12
ENSG00000238042	LINC02257	lncRNA	orange	0.487803	0.011473	-0.0634588	0.758102	0.934695	2.83756e-12
ENSG00000165061	ZMAT4	protein_coding	orange	0.465206	0.016631	0.000822407	0.996819	0.907313	1.64189e-10
ENSG00000171435	KSR2	protein_coding	orange	0.475364	0.0141164	0.0135408	0.947655	0.905615	2.02318e-10
ENSG00000188730	VWC2	protein_coding	orange	0.484239	0.0121845	-0.034874	0.865696	0.902994	2.77179e-10
ENSG00000254233	LINC02365	lncRNA	orange	0.446505	0.0222194	-0.0466739	0.820883	0.899295	4.25863e-10
ENSG00000264696	NA	NA	orange	0.469986	0.0154056	-0.0442664	0.829986	0.898434	4.69482e-10
ENSG00000176204	LRRTM4	protein_coding	orange	0.489203	0.0112032	0.0110827	0.957148	0.893024	8.50391e-10
ENSG00000167080	B4GALNT2	protein_coding	orange	0.398529	0.0437385	-0.0558365	0.786452	0.88353	2.24256e-09
ENSG00000114270	COL7A1	protein_coding	orange	0.447091	0.0220238	-0.034761	0.866127	0.869822	7.91972e-09
ENSG00000110318	CEP126	protein_coding	orange	0.372417	0.0609842	-0.107621	0.600767	0.865339	1.16061e-08
ENSG00000165323	FAT3	protein_coding	orange	0.486701	0.0116892	-0.081341	0.69283	0.862771	1.43584e-08
ENSG00000250420	AACSP1	transcribed_unprocessed_pseudogene	orange	0.502812	0.00884361	-0.0401508	0.845597	0.858039	2.1023e-08
ENSG00000185988	PLK5	protein_coding	orange	0.464179	0.0169046	0.126658	0.537525	0.854129	2.85157e-08
ENSG00000132749	TESMIN	protein_coding	orange	0.477398	0.0136527	0.050252	0.807395	0.853027	3.10255e-08
ENSG00000248705	AC114812.4	unprocessed_pseudogene	orange	0.591806	0.00144939	-0.0474034	0.818129	0.8482	4.45395e-08
ENSG00000182256	GABRG3	protein_coding	orange	0.446744	0.0221396	-0.07773	0.705857	0.845201	5.54168e-08
ENSG00000157856	DRC1	protein_coding	orange	0.384378	0.0525272	-0.0589468	0.77485	0.838047	9.1654e-08
ENSG00000145040	UCN2	protein_coding	orange	0.436851	0.0256525	-0.063848	0.756662	0.837458	9.54297e-08
ENSG00000228127	LINC01649	lncRNA	orange	0.485495	0.0119297	-0.0172047	0.933519	0.834028	1.20328e-07
ENSG00000176092	CRYBG2	protein_coding	orange	0.284772	0.158529	-0.171845	0.401236	0.816814	3.57779e-07
ENSG00000259534	AC087477.4	lncRNA	orange	0.365733	0.0661489	-0.0109795	0.957546	0.813442	4.37125e-07
ENSG00000134762	DSC3	protein_coding	orange	0.35438	0.0756863	-0.0604388	0.7693	0.80381	7.58292e-07
ENSG00000280134	AL731532.2	TEC	orange	0.314997	0.117024	-0.0996284	0.628222	0.799374	9.67528e-07
ENSG00000242295	AC087477.1	processed_pseudogene	orange	0.358934	0.0717425	0.0037644	0.985439	0.798297	1.02556e-06
ENSG00000131080	EDA2R	protein_coding	orange	0.546625	0.00385966	0.158891	0.43817	0.796596	1.12365e-06
ENSG00000187627	RGPD1	protein_coding	orange	0.335023	0.0943228	-0.104303	0.612104	0.788121	1.74924e-06
ENSG00000270067	AC008536.1	lncRNA	orange	0.431119	0.027886	0.160378	0.43384	0.787372	1.81725e-06
ENSG00000240216	CPHL1P	transcribed_unitary_pseudogene	orange	0.370094	0.0627425	-0.0970213	0.637285	0.78551	1.99679e-06
ENSG00000251432	AC108062.1	lncRNA	orange	0.291482	0.148523	0.0576058	0.779847	0.776091	3.17243e-06
ENSG00000171451	DSEL	protein_coding	orange	0.275753	0.172717	-0.00106923	0.995864	0.773698	3.55596e-06
ENSG00000144596	GRIP2	protein_coding	orange	0.593904	0.00138012	0.084864	0.680203	0.771231	3.99427e-06
ENSG00000112280	COL9A1	protein_coding	orange	0.427829	0.0292371	0.0741491	0.718855	0.766665	4.9346e-06
ENSG00000258774	NANOGP7	transcribed_processed_pseudogene	orange	0.339726	0.0895076	-0.12428	0.545249	0.765485	5.20778e-06
ENSG00000181126	HLA-V	transcribed_unprocessed_pseudogene	orange	0.534615	0.00489766	0.102491	0.618333	0.760803	6.4295e-06
ENSG00000196337	CGB7	protein_coding	orange	0.350185	0.0794646	-0.146352	0.475596	0.759678	6.75868e-06
ENSG00000259498	TPM1-AS	lncRNA	orange	0.24131	0.235	-0.15251	0.457015	0.750842	9.91461e-06
ENSG00000173535	TNFRSF10C	protein_coding	orange	0.609864	0.000940312	0.243285	0.231073	0.749275	1.05946e-05
ENSG00000164746	C7orf57	protein_coding	orange	0.481066	0.0128483	-0.0551535	0.789006	0.748141	1.11124e-05
ENSG00000279812	AC120057.5	TEC	orange	0.487089	0.0116129	0.127513	0.534761	0.743992	1.32037e-05
ENSG00000007306	CEACAM7	protein_coding	orange	0.5554	0.00322514	0.220249	0.279624	0.741455	1.46487e-05
ENSG00000139625	MAP3K12	protein_coding	orange	0.405517	0.0398498	0.06387	0.756581	0.739717	1.57185e-05
ENSG00000197165	SULT1A2	protein_coding	orange	0.527907	0.00557383	0.277286	0.170244	0.737193	1.73955e-05
ENSG00000228203	RNF144A-AS1	lncRNA	orange	0.358146	0.0724137	-0.131629	0.521545	0.734049	1.97055e-05
ENSG00000183018	SPNS2	protein_coding	orange	0.484454	0.0121407	0.0443311	0.829741	0.731962	2.13866e-05
ENSG00000150551	LYPD1	protein_coding	orange	0.415125	0.034957	-0.179682	0.379768	0.725948	2.69636e-05
ENSG00000130813	C19orf66	protein_coding	orange	0.318036	0.113343	-0.195934	0.33742	0.722208	3.10507e-05
ENSG00000214999	AC129492.1	lncRNA	orange	0.46945	0.015539	0.0529296	0.797337	0.718048	3.62347e-05
ENSG00000183072	NKX2-5	protein_coding	orange	0.525159	0.0058727	0.187078	0.36013	0.711523	4.59173e-05
ENSG00000109452	INPP4B	protein_coding	orange	0.272208	0.17853	-0.177007	0.387022	0.710765	4.71778e-05
ENSG00000135925	WNT10A	protein_coding	orange	0.270999	0.180542	-0.0878994	0.66939	0.704452	5.89343e-05
ENSG00000240498	CDKN2B-AS1	lncRNA	orange	0.331767	0.0977687	-0.0976356	0.635145	0.70413	5.95973e-05
ENSG00000185737	NRG3	protein_coding	orange	0.302919	0.132523	-0.0939492	0.64803	0.702126	6.38771e-05
ENSG00000257918	AC079385.3	lncRNA	orange	0.329288	0.100456	-0.0697627	0.734881	0.696908	7.63223e-05
ENSG00000070729	CNGB1	protein_coding	orange	0.340886	0.088349	-0.0267298	0.896871	0.696439	7.75395e-05
ENSG00000122970	IFT81	protein_coding	orange	0.412043	0.0364714	0.2583	0.202644	0.696074	7.84995e-05
ENSG00000267701	NA	NA	orange	0.348311	0.0811984	-0.0912489	0.657532	0.691223	9.22766e-05
ENSG00000123892	RAB38	protein_coding	orange	0.383165	0.0533412	-0.0773619	0.70719	0.690871	9.33543e-05
ENSG00000232450	AL133517.1	transcribed_processed_pseudogene	orange	0.43562	0.0261197	0.102208	0.619306	0.690055	9.58952e-05
ENSG00000203727	SAMD5	protein_coding	orange	0.466951	0.0161746	-0.0400214	0.846089	0.688819	9.98632e-05
ENSG00000134824	FADS2	protein_coding	orange	0.519083	0.00658186	0.231955	0.254198	0.687841	0.0001031
ENSG00000111785	RIC8B	protein_coding	orange	0.326111	0.103978	0.06491	0.752738	0.686493	0.000107718
ENSG00000250740	AC109361.2	lncRNA	orange	0.335153	0.0941873	0.143159	0.485378	0.684529	0.000114772
ENSG00000258667	HIF1A-AS2	lncRNA	orange	0.722929	3.02231e-05	0.493834	0.0103477	0.675376	0.000153294
ENSG00000231672	DIRC3	protein_coding	orange	0.418909	0.0331675	-0.167064	0.414659	0.666169	0.000203085
ENSG00000235899	LINC01564	lncRNA	orange	0.309798	0.123523	-0.179523	0.380199	0.66609	0.000203567
ENSG00000186765	FSCN2	protein_coding	orange	0.428119	0.0291163	0.137984	0.501452	0.665075	0.000209855
ENSG00000279522	AC008536.3	TEC	orange	0.375353	0.0588172	0.133304	0.516212	0.663298	0.000221271
ENSG00000272862	AC106052.1	lncRNA	orange	0.407955	0.0385601	0.00934063	0.963879	0.662644	0.000225605
ENSG00000176289	IDSP1	unprocessed_pseudogene	orange	0.240257	0.237111	-0.144191	0.482206	0.661816	0.000231207
ENSG00000263727	AP001178.1	lncRNA	orange	0.513056	0.00735504	0.286509	0.155894	0.658447	0.000255255
ENSG00000254944	ATP5F1P5	processed_pseudogene	orange	0.383865	0.05287	0.0262566	0.898687	0.657636	0.000261365
ENSG00000273077	AC110609.1	lncRNA	orange	0.293706	0.145309	0.144112	0.482447	0.656432	0.000270663
ENSG00000144452	ABCA12	protein_coding	orange	0.529325	0.00542466	0.288393	0.153072	0.656032	0.000273819
ENSG00000263325	AC003965.2	lncRNA	orange	0.218624	0.283276	-0.0429895	0.834823	0.653887	0.000291288
ENSG00000076067	RBMS2	protein_coding	orange	0.144644	0.480816	-0.0446549	0.828516	0.653467	0.000294818
ENSG00000239351	NPM1P29	processed_pseudogene	orange	0.442092	0.0237394	0.049913	0.808671	0.652044	0.000307064
ENSG00000230131	AL160290.2	lncRNA	orange	0.67386	0.000160668	0.372321	0.061056	0.650908	0.000317155
ENSG00000154537	FAM27C	lncRNA	orange	0.303899	0.131213	0.001172	0.995466	0.64818	0.000342592
ENSG00000119771	KLHL29	protein_coding	orange	0.204201	0.317015	-0.0265104	0.897713	0.647802	0.000346253
ENSG00000229558	SACS-AS1	lncRNA	orange	0.361517	0.0695763	-0.0739119	0.719719	0.647801	0.000346266
ENSG00000118785	SPP1	protein_coding	orange	0.19801	0.332222	-0.103906	0.613465	0.646268	0.000361463
ENSG00000175170	FAM182B	protein_coding	orange	0.56978	0.00237721	0.269108	0.183722	0.642675	0.000399395
ENSG00000129654	FOXJ1	protein_coding	orange	0.204626	0.315988	-0.103788	0.613872	0.639165	0.000439756
ENSG00000078177	N4BP2	protein_coding	orange	0.649591	0.000329222	0.339454	0.0897806	0.638746	0.000444808
ENSG00000109814	UGDH	protein_coding	orange	0.550334	0.00357957	-0.0216564	0.91637	0.638497	0.000447826
ENSG00000257042	AC008011.2	lncRNA	orange	0.169687	0.407264	-0.160674	0.432979	0.629483	0.000570096
ENSG00000198729	PPP1R14C	protein_coding	orange	0.468142	0.0158692	0.0253941	0.901999	0.619987	0.000729347
ENSG00000103647	CORO2B	protein_coding	orange	0.474562	0.0143029	-0.0286872	0.889363	0.616829	0.000790233
ENSG00000099194	SCD	protein_coding	orange	0.418197	0.0334981	0.109068	0.595852	0.613724	0.000854348
ENSG00000274026	FAM27E3	transcribed_processed_pseudogene	orange	0.181056	0.376075	-0.164095	0.423118	0.611751	0.00089741
ENSG00000087494	PTHLH	protein_coding	orange	0.19245	0.346249	-0.0764181	0.71061	0.610294	0.000930384
ENSG00000276966	HIST1H4E	protein_coding	orange	0.469278	0.0155821	0.411413	0.0367871	0.609531	0.000948076
ENSG00000126562	WNK4	protein_coding	orange	0.254114	0.210318	-0.0901071	0.661565	0.604814	0.00106402
ENSG00000197283	SYNGAP1	protein_coding	orange	0.367134	0.0650394	0.242576	0.232478	0.603475	0.00109909
ENSG00000132639	SNAP25	protein_coding	orange	0.0610852	0.7669	-0.077408	0.707023	0.600034	0.00119383
ENSG00000233818	AP000695.2	lncRNA	orange	0.672308	0.000168538	0.235095	0.247645	0.591191	0.00147023
ENSG00000229585	RPL21P44	processed_pseudogene	orange	0.231226	0.255737	0.204021	0.31745	0.588321	0.00157107
ENSG00000250410	AC112722.1	lncRNA	orange	0.179829	0.379373	-0.0768293	0.709119	0.586992	0.00161973
ENSG00000161714	PLCD3	protein_coding	orange	0.196472	0.336067	-0.0555522	0.787515	0.586628	0.00163328
ENSG00000272389	AC008536.2	lncRNA	orange	0.325339	0.104847	0.271761	0.179272	0.58635	0.00164372
ENSG00000163393	SLC22A15	protein_coding	orange	0.257893	0.203382	-0.0139701	0.945998	0.581019	0.00185483
ENSG00000261089	CDC37P2	processed_pseudogene	orange	0.377252	0.0574472	0.26851	0.184735	0.580502	0.00187644
ENSG00000258813	AL442663.3	lncRNA	orange	0.601672	0.00114787	0.432838	0.0272005	0.580366	0.0018822
ENSG00000227484	CR559946.1	lncRNA	orange	0.100739	0.624379	-0.0934265	0.649865	0.578832	0.0019479
ENSG00000274911	AL627230.2	unprocessed_pseudogene	orange	0.172693	0.398881	0.0374263	0.855963	0.570732	0.00232856
ENSG00000278318	ZNF229	protein_coding	orange	0.145133	0.479319	-0.0415847	0.840152	0.560066	0.00292552
ENSG00000249635	AC109361.1	lncRNA	orange	0.161864	0.429537	-0.201546	0.323484	0.55991	0.00293515
ENSG00000180626	ZNF594	protein_coding	orange	0.410119	0.0374427	0.449446	0.0212515	0.556023	0.00318365
ENSG00000114268	PFKFB4	protein_coding	orange	0.542308	0.00420881	0.319034	0.112153	0.541533	0.00427425
ENSG00000059691	GATB	protein_coding	orange	0.288907	0.152308	-0.170551	0.404844	0.541158	0.00430624
ENSG00000256124	LINC01152	lncRNA	orange	0.207905	0.308123	0.169616	0.407463	0.531446	0.00520788
ENSG00000092607	TBX15	protein_coding	orange	0.308943	0.124617	-0.201992	0.32239	0.516977	0.00684389
ENSG00000076351	SLC46A1	protein_coding	orange	0.0248497	0.904091	-0.0102581	0.960334	0.512837	0.00738444
ENSG00000245248	USP2-AS1	lncRNA	orange	0.135888	0.508037	-0.127039	0.536291	0.499529	0.00937094
ENSG00000206053	JPT2	protein_coding	orange	0.26014	0.199333	0.0769925	0.708528	0.499279	0.00941218
ENSG00000179148	ALOXE3	protein_coding	orange	0.549066	0.00367333	-0.0397889	0.846973	0.498	0.00962532
ENSG00000139354	GAS2L3	protein_coding	orange	0.143675	0.483792	0.103242	0.615747	0.49669	0.00984776
ENSG00000269959	SPACA6P-AS	lncRNA	orange	0.330846	0.0987608	0.20396	0.3176	0.49092	0.0108794
ENSG00000234373	SNX18P7	processed_pseudogene	orange	0.428307	0.0290378	0.255851	0.20711	0.488433	0.0113511
ENSG00000229140	CCDC26	lncRNA	orange	0.475191	0.0141564	-0.0146489	0.943378	0.480841	0.0128965
ENSG00000183780	SLC35F3	protein_coding	orange	0.509745	0.00781124	0.165411	0.419358	0.47185	0.0149482
ENSG00000149582	TMEM25	protein_coding	orange	0.217694	0.285381	0.216484	0.288132	0.461528	0.0176277
ENSG00000109944	JHY	protein_coding	orange	0.167367	0.413799	-0.0418402	0.839182	0.442439	0.0236169
ENSG00000112852	PCDHB2	protein_coding	orange	0.12486	0.543361	-0.0664749	0.746965	0.427145	0.0295249
ENSG00000150782	IL18	protein_coding	orange	0.0326142	0.874328	-0.0683717	0.739986	0.426609	0.0297517
ENSG00000257642	KCCAT198	lncRNA	orange	0.733047	2.04975e-05	0.575557	0.00209486	0.398254	0.0438973
ENSG00000009830	POMT2	protein_coding	royalblue	0.562434	0.00278278	0.472616	0.0147636	0.364879	0.0668331
ENSG00000198707	CEP290	protein_coding	royalblue	0.487367	0.0115582	0.306153	0.128236	0.282544	0.161954
ENSG00000256564	AC007552.2	lncRNA	royalblue	0.476034	0.0139624	0.508326	0.0080139	0.356598	0.0737452
ENSG00000235884	LINC00941	lncRNA	royalblue	0.463018	0.017218	0.247996	0.221881	0.432815	0.0272096
ENSG00000204956	PCDHGA1	protein_coding	royalblue	0.461306	0.0176893	0.314919	0.11712	0.472304	0.0148384
ENSG00000259495	AC016705.2	lncRNA	royalblue	0.406312	0.0394254	0.393637	0.0466346	0.176296	0.388962
ENSG00000159842	ABR	protein_coding	royalblue	0.397294	0.0444558	0.413292	0.0358517	0.212933	0.296305
ENSG00000154127	UBASH3B	protein_coding	royalblue	0.370571	0.0623788	0.323298	0.107173	0.400087	0.0428465
ENSG00000272975	MYHAS	lncRNA	royalblue	0.365664	0.0662039	0.471841	0.0149503	0.0753299	0.71456
ENSG00000196498	NCOR2	protein_coding	royalblue	0.357084	0.0733251	0.261103	0.197615	0.200005	0.327273
ENSG00000100583	SAMD15	protein_coding	royalblue	0.356514	0.0738184	0.498919	0.00947177	0.333327	0.0961063
ENSG00000145700	ANKRD31	protein_coding	royalblue	0.35092	0.0787925	0.407176	0.0389684	0.318637	0.112625
ENSG00000234231	AC093616.1	unprocessed_pseudogene	royalblue	0.336375	0.0929198	0.355378	0.0748088	0.181876	0.373879
ENSG00000276545	PCDHGB9P	unprocessed_pseudogene	royalblue	0.33438	0.0949962	0.399866	0.0429721	0.339121	0.090116
ENSG00000240250	RN7SL541P	misc_RNA	royalblue	0.330888	0.0987156	0.548458	0.00371902	0.192332	0.34655
ENSG00000279068	AC244517.6	protein_coding	royalblue	0.323891	0.106493	0.274334	0.175028	0.159479	0.436455
ENSG00000139263	LRIG3	protein_coding	royalblue	0.300734	0.135479	0.609525	0.000948225	-0.0342535	0.868064
ENSG00000187987	ZSCAN23	protein_coding	royalblue	0.299849	0.13669	0.256394	0.206113	0.504678	0.00855521
ENSG00000188001	TPRG1	protein_coding	royalblue	-0.292059	0.147684	-0.18965	0.353445	-0.175894	0.39006
ENSG00000162490	DRAXIN	protein_coding	royalblue	-0.291761	0.148117	-0.13427	0.513149	-0.112565	0.584044
ENSG00000221890	NPTXR	protein_coding	royalblue	-0.286461	0.155966	-0.136489	0.506145	-0.122586	0.550785
ENSG00000170425	ADORA2B	protein_coding	royalblue	0.285712	0.1571	0.16504	0.420414	0.177662	0.385239
ENSG00000168412	MTNR1A	protein_coding	royalblue	0.283658	0.160235	0.0424644	0.836814	0.564049	0.0026889
ENSG00000120322	PCDHB8	protein_coding	royalblue	0.274629	0.174544	0.371537	0.0616458	0.0925541	0.652932
ENSG00000196924	FLNA	protein_coding	royalblue	0.271155	0.180281	0.216661	0.287728	0.355219	0.0749481
ENSG00000263680	AC007639.1	lncRNA	royalblue	0.266126	0.188815	0.152362	0.457456	0.0230124	0.911153
ENSG00000180263	FGD6	protein_coding	royalblue	0.266116	0.188832	0.397337	0.0444306	0.214007	0.293818
ENSG00000162378	ZYG11B	protein_coding	royalblue	-0.266011	0.189013	-0.10598	0.606364	-0.07723	0.707667
ENSG00000172819	RARG	protein_coding	royalblue	-0.264689	0.191304	-0.127877	0.533583	0.12691	0.53671
ENSG00000135083	CCNJL	protein_coding	royalblue	0.263079	0.194121	0.137566	0.50276	0.129159	0.529455
ENSG00000196670	ZFP62	protein_coding	royalblue	0.259909	0.199746	0.558523	0.00302185	0.25287	0.212636
ENSG00000162636	FAM102B	protein_coding	royalblue	-0.253148	0.212115	-0.0712477	0.729443	0.049096	0.811747
ENSG00000249699	LINC02261	lncRNA	royalblue	0.249533	0.218937	0.0686866	0.73883	-0.000652816	0.997475
ENSG00000255992	AC131009.1	lncRNA	royalblue	0.249393	0.219205	0.0448653	0.82772	0.44354	0.0232316
ENSG00000124225	PMEPA1	protein_coding	royalblue	0.247502	0.222834	0.333275	0.0961616	0.295938	0.142134
ENSG00000010803	SCMH1	protein_coding	royalblue	-0.246373	0.22502	-0.205024	0.315025	-0.159736	0.435707
ENSG00000173334	TRIB1	protein_coding	royalblue	-0.242773	0.232086	-0.010693	0.958653	-0.0415574	0.840255
ENSG00000077514	POLD3	protein_coding	royalblue	0.240769	0.236082	0.523734	0.00603297	0.163274	0.425474
ENSG00000205562	AL049775.1	lncRNA	royalblue	0.237657	0.242379	0.390931	0.0482999	0.19604	0.337152
ENSG00000038382	TRIO	protein_coding	royalblue	0.237564	0.242568	0.0805038	0.695843	0.556509	0.00315167
ENSG00000273259	AL049839.2	protein_coding	royalblue	0.23746	0.24278	0.359868	0.070953	0.212335	0.297695
ENSG00000253837	AC090197.1	lncRNA	royalblue	0.232401	0.253262	0.103329	0.615446	0.062799	0.760545
ENSG00000168495	POLR3D	protein_coding	royalblue	0.228184	0.262218	0.430276	0.0282272	0.114498	0.577561
ENSG00000138448	ITGAV	protein_coding	royalblue	0.225808	0.267354	0.452322	0.0203379	-0.0586423	0.775984
ENSG00000255778	NA	NA	royalblue	-0.225793	0.267387	-0.0555518	0.787517	-0.0318942	0.877081
ENSG00000170525	PFKFB3	protein_coding	royalblue	0.22297	0.273574	0.345588	0.0837671	0.393171	0.0469179
ENSG00000118997	DNAH7	protein_coding	royalblue	0.221459	0.276922	0.297788	0.139539	0.275053	0.173854
ENSG00000138495	COX17	protein_coding	royalblue	-0.219979	0.280229	-0.298496	0.138556	-0.299494	0.137177
ENSG00000173281	PPP1R3B	protein_coding	royalblue	0.218508	0.283537	0.288564	0.152818	0.147137	0.473205
ENSG00000133640	LRRIQ1	protein_coding	royalblue	0.215271	0.290908	0.175698	0.390599	0.257153	0.204728
ENSG00000169302	STK32A	protein_coding	royalblue	-0.21474	0.292127	-0.0303383	0.883037	-0.00590087	0.977176
ENSG00000228412	AL022068.1	lncRNA	royalblue	-0.211385	0.299913	-0.129855	0.527219	-0.0398712	0.84666
ENSG00000140575	IQGAP1	protein_coding	royalblue	0.209304	0.304808	0.263394	0.193567	-0.109847	0.593212
ENSG00000064042	LIMCH1	protein_coding	royalblue	-0.209094	0.305303	-0.0630001	0.7598	-0.0556809	0.787034
ENSG00000259717	LINC00677	lncRNA	royalblue	0.207625	0.308791	0.515493	0.00703367	0.0527969	0.797835
ENSG00000176907	TCIM	protein_coding	royalblue	-0.204073	0.317324	-0.0589024	0.775015	0.017914	0.930784
ENSG00000228816	AK3P5	processed_pseudogene	royalblue	0.202807	0.320401	0.103213	0.615848	0.0810228	0.693975
ENSG00000259518	LINC01583	lncRNA	royalblue	0.202194	0.321898	0.234513	0.24885	0.00810342	0.968661
ENSG00000117020	AKT3	protein_coding	royalblue	0.200365	0.326386	0.301445	0.134512	0.125384	0.541657
ENSG00000279375	AC244517.7	lncRNA	royalblue	0.197844	0.332635	0.183294	0.370104	0.196006	0.337238
ENSG00000272070	AC005618.1	lncRNA	royalblue	0.194681	0.340579	0.14722	0.472951	0.410279	0.0373611
ENSG00000256870	SLC5A8	protein_coding	royalblue	-0.188837	0.35555	-0.0326723	0.874106	-0.00871721	0.966288
ENSG00000170858	LILRP2	transcribed_processed_pseudogene	royalblue	-0.188498	0.356431	-0.0428943	0.835184	-0.0865107	0.674329
ENSG00000066557	LRRC40	protein_coding	royalblue	-0.188497	0.356432	-0.101899	0.62037	-0.214001	0.293833
ENSG00000196136	SERPINA3	protein_coding	royalblue	0.187906	0.357969	0.256749	0.205464	0.0695057	0.735824
ENSG00000111328	CDK2AP1	protein_coding	royalblue	0.187745	0.358391	0.0750822	0.715461	0.16944	0.407957
ENSG00000172817	CYP7B1	protein_coding	royalblue	0.185011	0.365557	0.294229	0.14456	0.105584	0.607716
ENSG00000228157	AC007952.2	lncRNA	royalblue	0.183534	0.369466	0.482033	0.0126429	0.104757	0.610548
ENSG00000157168	NRG1	protein_coding	royalblue	0.179805	0.379438	-0.0784113	0.703393	0.530115	0.0053431
ENSG00000154930	ACSS1	protein_coding	royalblue	-0.178454	0.383089	-0.355814	0.0744275	-0.209201	0.30505
ENSG00000273038	AL365203.2	lncRNA	royalblue	0.177097	0.386774	0.0600539	0.770731	0.356938	0.0734509
ENSG00000145687	SSBP2	protein_coding	royalblue	-0.174915	0.392746	-0.0925735	0.652864	-0.0295828	0.88593
ENSG00000184867	ARMCX2	protein_coding	royalblue	0.167907	0.412272	0.249118	0.219729	-0.0497194	0.8094
ENSG00000147724	FAM135B	protein_coding	royalblue	0.167532	0.413334	0.373795	0.0599595	-0.0653316	0.751181
ENSG00000248449	PCDHGB8P	transcribed_unitary_pseudogene	royalblue	0.166297	0.416834	0.155116	0.449266	0.074649	0.717036
ENSG00000139645	ANKRD52	protein_coding	royalblue	0.165795	0.418263	0.15485	0.450055	0.16194	0.429317
ENSG00000235947	EGOT	lncRNA	royalblue	0.164191	0.422842	0.308658	0.124983	0.0400767	0.845879
ENSG00000160471	COX6B2	protein_coding	royalblue	-0.163773	0.42404	-0.0960895	0.640537	-0.0527137	0.798147
ENSG00000175970	UNC119B	protein_coding	royalblue	0.161681	0.430063	0.343644	0.085639	0.134596	0.512116
ENSG00000101384	JAG1	protein_coding	royalblue	0.159558	0.436224	0.216541	0.288001	0.381283	0.0546221
ENSG00000135486	HNRNPA1	protein_coding	royalblue	-0.155688	0.447575	-0.0690961	0.737327	0.0581327	0.777882
ENSG00000256797	KLRF2	protein_coding	royalblue	-0.154043	0.452448	-0.0793362	0.700053	-0.0549948	0.7896
ENSG00000074657	ZNF532	protein_coding	royalblue	0.154031	0.452483	0.430548	0.0281168	0.231232	0.255723
ENSG00000177994	C2orf73	protein_coding	royalblue	0.153833	0.453071	0.12758	0.534544	0.151997	0.458546
ENSG00000230445	LRRC37A6P	transcribed_processed_pseudogene	royalblue	0.15287	0.455938	0.236381	0.244992	0.111624	0.587211
ENSG00000262884	AC015921.1	lncRNA	royalblue	-0.15087	0.461925	0.0926598	0.652561	-0.0464725	0.821643
ENSG00000235721	AC013268.3	processed_pseudogene	royalblue	0.150599	0.46274	0.433441	0.0269631	-0.080744	0.694978
ENSG00000244144	AC128688.1	processed_pseudogene	royalblue	0.147552	0.471943	-0.0708861	0.730766	0.544233	0.00404995
ENSG00000080709	KCNN2	protein_coding	royalblue	-0.144029	0.482704	-0.0239881	0.907402	-0.00368647	0.98574
ENSG00000178776	C5orf46	protein_coding	royalblue	-0.142421	0.487656	-0.0202858	0.921646	-0.0130415	0.949582
ENSG00000281789	NA	NA	royalblue	0.141034	0.491949	0.101472	0.621844	0.330694	0.0989248
ENSG00000084636	COL16A1	protein_coding	royalblue	-0.138994	0.498295	0.130895	0.52389	0.0514788	0.802783
ENSG00000123119	NECAB1	protein_coding	royalblue	-0.138961	0.498397	-0.0544379	0.791684	0.00337974	0.986927
ENSG00000145908	ZNF300	protein_coding	royalblue	0.137119	0.504163	-0.0586231	0.776055	0.4752	0.0141543
ENSG00000094755	GABRP	protein_coding	royalblue	-0.137053	0.504372	-0.0292757	0.887107	0.00271369	0.989503
ENSG00000254340	AC022784.7	lncRNA	royalblue	0.13324	0.516414	0.171966	0.400898	0.266292	0.18853
ENSG00000134294	SLC38A2	protein_coding	royalblue	0.129631	0.527938	-0.122253	0.551876	0.537387	0.00463925
ENSG00000104723	TUSC3	protein_coding	royalblue	0.125235	0.542143	0.40662	0.0392622	-0.0537665	0.794199
ENSG00000113300	CNOT6	protein_coding	royalblue	-0.123846	0.546665	0.0135588	0.947586	0.0685234	0.739429
ENSG00000251320	AC011352.3	lncRNA	royalblue	-0.123512	0.547758	-0.00611234	0.976359	0.0161048	0.93776
ENSG00000205403	CFI	protein_coding	royalblue	-0.123132	0.549	0.0507667	0.805459	-0.0858014	0.676857
ENSG00000159167	STC1	protein_coding	royalblue	0.119393	0.561288	0.538795	0.00451241	0.0309662	0.880633
ENSG00000256043	CTSO	protein_coding	royalblue	-0.119084	0.562307	0.0724169	0.725171	0.107415	0.601468
ENSG00000240602	AADACP1	transcribed_unprocessed_pseudogene	royalblue	-0.118412	0.564533	-0.0389732	0.850075	-0.0556858	0.787016
ENSG00000249550	LINC01234	lncRNA	royalblue	-0.11746	0.56769	-0.0663444	0.747446	-0.041502	0.840466
ENSG00000237413	MGC27382	lncRNA	royalblue	-0.117387	0.567931	-0.0696372	0.735341	0.119992	0.559311
ENSG00000092969	TGFB2	protein_coding	royalblue	-0.117182	0.568613	-0.0322044	0.875895	0.195715	0.33797
ENSG00000064763	FAR2	protein_coding	royalblue	0.114744	0.576739	0.298564	0.138462	-0.151135	0.461128
ENSG00000133641	C12orf29	protein_coding	royalblue	-0.111971	0.586041	-0.113986	0.579275	-0.104266	0.61223
ENSG00000232480	TGFB2-AS1	lncRNA	royalblue	-0.111953	0.586103	0.0149594	0.94218	0.0884111	0.667573
ENSG00000248362	AC011352.1	lncRNA	royalblue	-0.111586	0.587338	-0.0390809	0.849665	0.00864728	0.966559
ENSG00000214650	AC073592.1	lncRNA	royalblue	0.111194	0.588661	0.420998	0.0322108	0.0430691	0.834522
ENSG00000129151	BBOX1	protein_coding	royalblue	0.108437	0.597993	0.243953	0.229753	0.169719	0.407174
ENSG00000169991	IFFO2	protein_coding	royalblue	0.105553	0.607823	0.0398977	0.846559	0.371958	0.0613289
ENSG00000102452	NALCN	protein_coding	royalblue	0.103872	0.613584	0.193335	0.343992	0.111621	0.58722
ENSG00000142621	FHAD1	protein_coding	royalblue	-0.103588	0.614559	-0.143505	0.484314	0.10478	0.610467
ENSG00000204764	RANBP17	protein_coding	royalblue	-0.101888	0.620409	-0.0146569	0.943347	-0.0318869	0.87711
ENSG00000173218	VANGL1	protein_coding	royalblue	0.0986345	0.631671	0.129915	0.527027	0.0751319	0.71528
ENSG00000246130	AC107959.2	lncRNA	royalblue	0.0953078	0.64327	0.243256	0.23113	-0.061237	0.766336
ENSG00000142949	PTPRF	protein_coding	royalblue	-0.0945164	0.646041	-0.0308527	0.881067	0.066558	0.746659
ENSG00000261060	AL160286.2	lncRNA	royalblue	-0.0914408	0.656855	0.0878275	0.669645	-0.0823028	0.689375
ENSG00000123977	DAW1	protein_coding	royalblue	-0.0903778	0.660608	-0.0714213	0.728808	0.0403198	0.844955
ENSG00000131437	KIF3A	protein_coding	royalblue	-0.0899945	0.661963	0.046744	0.820618	0.242018	0.233586
ENSG00000142609	CFAP74	protein_coding	royalblue	-0.0897707	0.662755	0.0235582	0.909054	0.00293718	0.988638
ENSG00000237523	LINC00857	lncRNA	royalblue	-0.0888529	0.666006	0.109486	0.594435	0.267776	0.185985
ENSG00000253213	AC010306.1	processed_pseudogene	royalblue	-0.0885962	0.666916	0.0957716	0.641648	-0.0102111	0.960515
ENSG00000253525	AC104966.1	processed_pseudogene	royalblue	-0.0877077	0.670071	-0.0384867	0.851926	0.106517	0.604529
ENSG00000228940	AL391730.1	unprocessed_pseudogene	royalblue	-0.0868416	0.673151	0.0523425	0.79954	0.0123732	0.952163
ENSG00000131044	TTLL9	protein_coding	royalblue	0.0861012	0.675788	-0.00735831	0.971541	0.461811	0.0175492
ENSG00000174233	ADCY6	protein_coding	royalblue	0.0858162	0.676804	0.2806	0.164986	0.269631	0.182839
ENSG00000108018	SORCS1	protein_coding	royalblue	-0.0845534	0.681313	0.0655629	0.750328	-0.117479	0.567626
ENSG00000213376	GAPDHP71	processed_pseudogene	royalblue	-0.0838304	0.683899	-0.0542105	0.792536	-0.0116035	0.955136
ENSG00000029153	ARNTL2	protein_coding	royalblue	-0.0815799	0.691972	-0.0861324	0.675677	0.0853833	0.678349
ENSG00000167291	TBC1D16	protein_coding	royalblue	0.0813016	0.692972	0.374806	0.0592163	0.114257	0.578367
ENSG00000231298	LINC00704	lncRNA	royalblue	-0.0811327	0.69358	-0.136686	0.505523	0.160055	0.43478
ENSG00000141519	CCDC40	protein_coding	royalblue	0.0769513	0.708677	-0.0100332	0.961203	0.344111	0.0851871
ENSG00000155850	SLC26A2	protein_coding	royalblue	0.0765924	0.709978	0.0437317	0.832011	0.0671094	0.744629
ENSG00000132561	MATN2	protein_coding	royalblue	-0.0765095	0.710278	-0.136787	0.505207	0.193442	0.343721
ENSG00000141540	TTYH2	protein_coding	royalblue	-0.0760265	0.712031	-0.0849811	0.679785	-0.159946	0.435096
ENSG00000109738	GLRB	protein_coding	royalblue	0.0756767	0.713301	-0.00711543	0.97248	0.378131	0.0568218
ENSG00000185483	ROR1	protein_coding	royalblue	0.0752507	0.714848	0.0930273	0.651268	-0.0627695	0.760654
ENSG00000196458	ZNF605	protein_coding	royalblue	0.0742816	0.718373	0.212373	0.297608	0.237484	0.242732
ENSG00000253250	C8orf88	protein_coding	royalblue	-0.0724213	0.725154	0.0279153	0.892322	0.00580392	0.977551
ENSG00000165671	NSD1	protein_coding	royalblue	0.0720025	0.726684	0.316052	0.115736	0.170991	0.403614
ENSG00000253771	TPTE2P1	transcribed_unprocessed_pseudogene	royalblue	0.0719376	0.726921	0.194403	0.341281	0.328701	0.101099
ENSG00000270021	AC026691.1	lncRNA	royalblue	0.0712244	0.729528	-0.0842737	0.682313	-0.0212912	0.917775
ENSG00000107186	MPDZ	protein_coding	royalblue	-0.0700798	0.733719	0.102071	0.619779	0.108452	0.597941
ENSG00000111666	CHPT1	protein_coding	royalblue	0.0699144	0.734325	-0.0777663	0.705726	-0.0980398	0.633739
ENSG00000230612	AC004039.1	lncRNA	royalblue	0.0689294	0.737938	0.12575	0.540468	0.435923	0.0260042
ENSG00000224984	AL512363.1	lncRNA	royalblue	0.0656538	0.749992	0.0953221	0.64322	0.0589557	0.774816
ENSG00000150093	ITGB1	protein_coding	royalblue	0.0613511	0.765912	0.282534	0.161969	0.134472	0.512506
ENSG00000132763	MMACHC	protein_coding	royalblue	0.0586785	0.775849	0.248306	0.221285	-0.123168	0.548882
ENSG00000140839	CLEC18B	protein_coding	royalblue	-0.0583087	0.777226	-0.0321417	0.876135	0.0882509	0.668142
ENSG00000151229	SLC2A13	protein_coding	royalblue	0.0545998	0.791078	0.251186	0.215801	0.0892693	0.66453
ENSG00000248538	AC022784.1	lncRNA	royalblue	-0.0544898	0.79149	0.120056	0.559098	0.0145447	0.94378
ENSG00000165972	CCDC38	protein_coding	royalblue	0.0535092	0.795164	-0.03151	0.878552	0.465359	0.0165905
ENSG00000280054	AC004241.5	TEC	royalblue	0.0526781	0.79828	0.175013	0.392476	0.155681	0.447598
ENSG00000221916	C19orf73	protein_coding	royalblue	-0.0452063	0.82643	-0.232078	0.25394	0.0476117	0.817343
ENSG00000124251	TP53TG5	protein_coding	royalblue	-0.0418156	0.839275	0.0861275	0.675694	0.166867	0.415216
ENSG00000138119	MYOF	protein_coding	royalblue	0.0395255	0.847974	-0.0266908	0.89702	0.090814	0.659067
ENSG00000184304	PRKD1	protein_coding	royalblue	-0.0388342	0.850604	0.0677615	0.742229	0.206047	0.312564
ENSG00000079739	PGM1	protein_coding	royalblue	0.0349461	0.86542	-0.161396	0.430889	0.0541914	0.792607
ENSG00000152580	IGSF10	protein_coding	royalblue	0.0333603	0.871476	-0.04426	0.83001	0.282502	0.162019
ENSG00000204904	LINC01545	lncRNA	royalblue	0.0306345	0.881902	0.0191881	0.925874	0.101554	0.621561
ENSG00000255176	AP000941.1	lncRNA	royalblue	0.0252584	0.90252	0.158385	0.43965	0.233779	0.250377
ENSG00000136918	WDR38	protein_coding	royalblue	-0.0242967	0.906215	-0.0441347	0.830485	0.177191	0.386521
ENSG00000255750	AC022509.1	lncRNA	royalblue	0.0241782	0.906671	0.0635376	0.75781	-0.0623561	0.762186
ENSG00000197249	SERPINA1	protein_coding	royalblue	0.020015	0.922689	0.031512	0.878544	0.356901	0.073483
ENSG00000112293	GPLD1	protein_coding	royalblue	0.0186569	0.927921	0.133228	0.516452	-0.0922557	0.653983
ENSG00000182263	FIGN	protein_coding	royalblue	-0.0166252	0.935753	-0.145051	0.479571	0.329157	0.100599
ENSG00000165309	ARMC3	protein_coding	royalblue	0.0129956	0.94976	0.00653511	0.974724	0.213685	0.294562
ENSG00000138735	PDE5A	protein_coding	royalblue	-0.0123355	0.952309	-0.010554	0.95919	0.394232	0.0462744
ENSG00000227141	AL160286.1	processed_pseudogene	royalblue	-0.00626166	0.975781	0.195777	0.337814	-0.060209	0.770154
ENSG00000165511	C10orf25	lncRNA	royalblue	0.00604594	0.976615	-0.0193389	0.925293	0.0391795	0.84929
ENSG00000214914	RPL23AP3	processed_pseudogene	royalblue	-0.00339067	0.986884	0.0353624	0.863831	0.104514	0.61138
ENSG00000245281	AC124242.1	lncRNA	royalblue	0.00336972	0.986965	0.182082	0.37333	0.239743	0.238147
ENSG00000261273	AC138512.1	lncRNA	red	0.559195	0.00297958	0.940418	9.72679e-13	-0.0172465	0.933358
ENSG00000254656	RTL1	protein_coding	red	0.651858	0.000308698	0.935223	2.58133e-12	-0.0317424	0.877662
ENSG00000258603	AC005225.2	lncRNA	red	0.633453	0.000513073	0.934351	3.01715e-12	0.0837456	0.684203
ENSG00000249274	PDLIM1P4	processed_pseudogene	red	0.547844	0.00376565	0.930723	5.64501e-12	-0.0826208	0.688234
ENSG00000205312	KRT17P4	transcribed_unprocessed_pseudogene	red	0.561287	0.00285115	0.930544	5.81737e-12	-0.016275	0.937104
ENSG00000198756	COLGALT2	protein_coding	red	0.551153	0.00352015	0.927693	9.28589e-12	-0.0428718	0.835269
ENSG00000230121	AL445070.1	lncRNA	red	0.524067	0.00599522	0.924016	1.65197e-11	-0.0344771	0.86721
ENSG00000265046	AC004253.2	lncRNA	red	0.544755	0.0040078	0.921341	2.46732e-11	0.130674	0.524597
ENSG00000125430	HS3ST3B1	protein_coding	red	0.546686	0.0038549	0.919814	3.08278e-11	-0.0498486	0.808913
ENSG00000279353	AP001324.3	TEC	red	0.608762	0.000966185	0.914911	6.12387e-11	0.0497221	0.809389
ENSG00000254042	AC011365.1	lncRNA	red	0.493281	0.010447	0.911629	9.47799e-11	-0.0566456	0.78343
ENSG00000259417	CTXND1	protein_coding	red	0.46925	0.0155892	0.906752	1.75994e-10	-0.0708671	0.730836
ENSG00000163485	ADORA1	protein_coding	red	0.447806	0.0217867	0.906445	1.82776e-10	-0.0624998	0.761653
ENSG00000198846	TOX	protein_coding	red	0.533849	0.0049712	0.904842	2.22209e-10	-0.0460466	0.823253
ENSG00000231794	AC009542.1	lncRNA	red	0.41385	0.0355772	0.904641	2.27665e-10	-0.0606336	0.768577
ENSG00000198626	RYR2	protein_coding	red	0.519366	0.00654727	0.902791	2.83918e-10	-0.0583423	0.777101
ENSG00000125931	CITED1	protein_coding	red	0.506163	0.00833118	0.899701	4.06573e-10	-0.0646854	0.753567
ENSG00000223774	AL513217.1	lncRNA	red	0.512669	0.00740716	0.898953	4.42733e-10	0.00249426	0.990352
ENSG00000122729	ACO1	protein_coding	red	0.576346	0.00205862	0.893132	8.40607e-10	-0.131895	0.520694
ENSG00000114349	GNAT1	protein_coding	red	0.439857	0.0245406	0.892684	8.818e-10	-0.0501415	0.807811
ENSG00000152104	PTPN14	protein_coding	red	0.389662	0.0490969	0.892494	8.99763e-10	-0.0156961	0.939337
ENSG00000224739	AC016735.1	lncRNA	red	0.611137	0.000911188	0.892475	9.01596e-10	0.234903	0.248041
ENSG00000253476	AC091185.1	lncRNA	red	0.481763	0.0127001	0.88841	1.37725e-09	0.0945048	0.646082
ENSG00000187720	THSD4	protein_coding	red	0.42316	0.0312447	0.887478	1.51427e-09	-0.0495735	0.809949
ENSG00000225362	CT62	protein_coding	red	0.439984	0.0244946	0.878518	3.61983e-09	-0.0767033	0.709576
ENSG00000135902	CHRND	protein_coding	red	0.512781	0.00739206	0.878501	3.62559e-09	-0.084726	0.680696
ENSG00000186510	CLCNKA	protein_coding	red	0.494434	0.010241	0.877184	4.09727e-09	-0.0858291	0.676758
ENSG00000268549	NA	NA	red	0.429585	0.0285096	0.876192	4.48834e-09	0.0148739	0.94251
ENSG00000135749	PCNX2	protein_coding	red	0.582596	0.00179007	0.876183	4.49214e-09	0.120601	0.557302
ENSG00000243083	LINC00870	lncRNA	red	0.477502	0.0136294	0.874879	5.05824e-09	0.0107488	0.958438
ENSG00000109758	HGFAC	protein_coding	red	0.478906	0.0133171	0.874424	5.2706e-09	-0.0555171	0.787646
ENSG00000007237	GAS7	protein_coding	red	0.326644	0.10338	0.872632	6.18801e-09	-0.0542355	0.792442
ENSG00000102531	FNDC3A	protein_coding	red	0.571769	0.00227651	0.867224	9.89984e-09	0.0926117	0.65273
ENSG00000175920	DOK7	protein_coding	red	0.477375	0.0136579	0.866396	1.06186e-08	-0.0839044	0.683634
ENSG00000229380	AC147651.1	lncRNA	red	0.400831	0.0424255	0.862814	1.43075e-08	-0.057189	0.781402
ENSG00000267265	AC011476.3	lncRNA	red	0.490905	0.0108822	0.859968	1.8027e-08	0.0666266	0.746406
ENSG00000236829	Z97634.1	transcribed_processed_pseudogene	red	0.576141	0.00206798	0.853991	2.88193e-08	-0.0935539	0.649418
ENSG00000259674	AC092868.1	processed_pseudogene	red	0.623304	0.000669805	0.853376	3.02114e-08	0.0716627	0.727926
ENSG00000148339	SLC25A25	protein_coding	red	0.461712	0.0175767	0.851646	3.44516e-08	-0.0864347	0.6746
ENSG00000067369	TP53BP1	protein_coding	red	0.618684	0.000753948	0.849845	3.94319e-08	0.182033	0.37346
ENSG00000181322	NME9	protein_coding	red	0.450293	0.020979	0.849822	3.95015e-08	-0.103948	0.613322
ENSG00000175344	CHRNA7	protein_coding	red	0.609009	0.00096034	0.848877	4.23714e-08	-0.10094	0.623684
ENSG00000165046	LETM2	protein_coding	red	0.819165	3.10408e-07	0.845572	5.39509e-08	0.101231	0.622677
ENSG00000181541	MAB21L2	protein_coding	red	0.318413	0.112893	0.844527	5.81681e-08	-0.0442728	0.829962
ENSG00000196361	ELAVL3	protein_coding	red	0.487906	0.011453	0.839083	8.53458e-08	-0.0458884	0.823851
ENSG00000273582	AC009093.5	lncRNA	red	0.324237	0.106098	0.834463	1.16874e-07	-0.0857554	0.677021
ENSG00000267053	AC012617.1	lncRNA	red	0.544441	0.00403311	0.832538	1.32867e-07	-0.0352175	0.864384
ENSG00000260285	AL133367.1	lncRNA	red	0.453731	0.0199026	0.831889	1.38684e-07	0.105636	0.607539
ENSG00000254154	AL359075.2	lncRNA	red	0.534712	0.00488845	0.829086	1.66545e-07	0.0339747	0.869129
ENSG00000181450	ZNF678	protein_coding	red	0.394385	0.0461823	0.828675	1.71029e-07	0.000425595	0.998354
ENSG00000237073	AL162727.2	lncRNA	red	0.412041	0.0364724	0.827266	1.87245e-07	0.0460611	0.823198
ENSG00000278090	AC036108.4	lncRNA	red	0.440337	0.0243666	0.82575	2.06228e-07	-0.0301866	0.883618
ENSG00000159261	CLDN14	protein_coding	red	0.509152	0.00789533	0.822675	2.50125e-07	0.0610469	0.767042
ENSG00000064225	ST3GAL6	protein_coding	red	0.497728	0.00967106	0.821203	2.73994e-07	-0.136997	0.504547
ENSG00000250376	AC093720.1	unprocessed_pseudogene	red	0.371782	0.0614614	0.820174	2.91872e-07	-0.106948	0.60306
ENSG00000258793	AL355102.4	lncRNA	red	0.618958	0.000748712	0.818481	3.2358e-07	0.222138	0.275416
ENSG00000251387	AC008667.3	lncRNA	red	0.541596	0.00426891	0.812932	4.5043e-07	-0.0845136	0.681455
ENSG00000267013	LINC01929	lncRNA	red	0.475708	0.0140372	0.81183	4.80377e-07	-0.0285646	0.889832
ENSG00000272068	AL365181.2	lncRNA	red	0.570466	0.00234204	0.811195	4.9844e-07	0.0851975	0.679012
ENSG00000243642	RN7SL526P	misc_RNA	red	0.326043	0.104054	0.80759	6.13094e-07	-0.140861	0.492485
ENSG00000224950	AL390066.1	lncRNA	red	0.51569	0.00700822	0.807419	6.19088e-07	0.0454838	0.82538
ENSG00000184661	CDCA2	protein_coding	red	0.606665	0.00101714	0.804846	7.15705e-07	0.10535	0.608518
ENSG00000252516	RNA5SP82	rRNA	red	0.27595	0.172397	0.804152	7.43958e-07	0.0313325	0.879231
ENSG00000100739	BDKRB1	protein_coding	red	0.522544	0.00616963	0.801923	8.41707e-07	0.20791	0.308112
ENSG00000215241	LINC02449	lncRNA	red	0.320055	0.110945	0.801218	8.74961e-07	-0.0295373	0.886105
ENSG00000205669	ACOT6	protein_coding	red	0.53661	0.00471046	0.800396	9.15165e-07	0.14979	0.465174
ENSG00000188295	ZNF669	protein_coding	red	0.261517	0.196878	0.799577	9.56892e-07	0.0293664	0.886759
ENSG00000135338	LCA5	protein_coding	red	0.327374	0.102566	0.79914	9.79879e-07	0.0457822	0.824252
ENSG00000143702	CEP170	protein_coding	red	0.499363	0.00939821	0.797992	1.04256e-06	0.0264829	0.897819
ENSG00000198435	NRARP	protein_coding	red	0.546709	0.0038531	0.796712	1.1167e-06	0.125876	0.540059
ENSG00000253537	PCDHGA7	protein_coding	red	0.412163	0.0364112	0.795893	1.16656e-06	-0.0332981	0.871714
ENSG00000242419	PCDHGC4	protein_coding	red	0.633202	0.000516521	0.790709	1.53134e-06	0.326213	0.103864
ENSG00000245479	LINC01585	lncRNA	red	0.42063	0.0323778	0.790529	1.54565e-06	0.0731518	0.722489
ENSG00000278949	AC127070.5	TEC	red	0.304088	0.130962	0.789585	1.62276e-06	0.0681168	0.740923
ENSG00000166664	CHRFAM7A	protein_coding	red	0.634842	0.000494333	0.786269	1.92176e-06	-0.148936	0.467752
ENSG00000157388	CACNA1D	protein_coding	red	0.348174	0.0813258	0.78496	2.05281e-06	0.0965851	0.638807
ENSG00000176919	C8G	protein_coding	red	0.528035	0.0055602	0.781343	2.45752e-06	-0.074365	0.71807
ENSG00000253190	AC084082.1	lncRNA	red	0.412613	0.0361876	0.780631	2.54508e-06	0.0820831	0.690164
ENSG00000188488	SERPINA5	protein_coding	red	0.356273	0.074028	0.778992	2.75744e-06	0.0397274	0.847207
ENSG00000151474	FRMD4A	protein_coding	red	0.293595	0.145469	0.778388	2.83957e-06	0.0830725	0.686614
ENSG00000235681	AC245884.3	processed_pseudogene	red	0.45732	0.0188272	0.777991	2.89482e-06	0.237599	0.242497
ENSG00000226101	LINC02097	lncRNA	red	0.358119	0.0724365	0.776115	3.16874e-06	0.19599	0.337277
ENSG00000053524	MCF2L2	protein_coding	red	0.540739	0.00434221	0.775799	3.2171e-06	-0.197503	0.333487
ENSG00000149043	SYT8	protein_coding	red	0.349518	0.0800786	0.775308	3.29361e-06	-0.0717458	0.727622
ENSG00000205683	DPF3	protein_coding	red	0.410063	0.0374713	0.773157	3.64818e-06	-0.105494	0.608024
ENSG00000267605	AC016590.1	lncRNA	red	0.377844	0.0570254	0.771582	3.92904e-06	-0.0996636	0.6281
ENSG00000054282	SDCCAG8	protein_coding	red	0.535688	0.0047962	0.770196	4.19209e-06	-0.0290564	0.887948
ENSG00000133055	MYBPH	protein_coding	red	0.38049	0.0551692	0.76998	4.23436e-06	-0.0722429	0.725806
ENSG00000261934	PCDHGA9	protein_coding	red	0.448183	0.0216627	0.765989	5.08945e-06	-0.0459206	0.823729
ENSG00000279949	AC022784.8	lncRNA	red	0.49775	0.00966748	0.7636	5.67224e-06	0.161232	0.431363
ENSG00000182013	PNMA8A	protein_coding	red	0.672311	0.000168523	0.76264	5.9225e-06	0.0965777	0.638832
ENSG00000215186	GOLGA6B	protein_coding	red	0.310247	0.122952	0.75777	7.35173e-06	-0.0849859	0.679767
ENSG00000111077	TNS2	protein_coding	red	0.556663	0.00314153	0.757506	7.4375e-06	-0.0186451	0.927967
ENSG00000257327	AC012555.1	lncRNA	red	0.667933	0.000192576	0.756805	7.66902e-06	0.0218836	0.915495
ENSG00000223723	BX842568.2	processed_pseudogene	red	0.421482	0.0319928	0.755134	8.24711e-06	-0.0803956	0.696233
ENSG00000138600	SPPL2A	protein_coding	red	0.502883	0.00883256	0.754498	8.47753e-06	-0.0283106	0.890806
ENSG00000136944	LMX1B	protein_coding	red	0.408399	0.0383287	0.753364	8.90179e-06	-0.133147	0.516709
ENSG00000272405	AL365181.3	lncRNA	red	0.594731	0.00135359	0.751823	9.50922e-06	0.10811	0.599105
ENSG00000139514	SLC7A1	protein_coding	red	0.599807	0.0012003	0.751386	9.68796e-06	0.0240116	0.907311
ENSG00000261633	AC018552.4	lncRNA	red	0.593901	0.0013802	0.746214	1.20436e-05	-0.000872563	0.996625
ENSG00000112992	NNT	protein_coding	red	0.620839	0.000713639	0.74598	1.21614e-05	0.0175976	0.932004
ENSG00000258285	TESC-AS1	lncRNA	red	0.459545	0.018185	0.745014	1.26586e-05	-0.0503753	0.806932
ENSG00000123836	PFKFB2	protein_coding	red	0.462323	0.0174082	0.744156	1.31148e-05	-0.147821	0.471126
ENSG00000174567	GOLT1A	protein_coding	red	0.418944	0.0331513	0.7441	1.31451e-05	-0.005738	0.977806
ENSG00000169118	CSNK1G1	protein_coding	red	0.56086	0.00287699	0.743676	1.33762e-05	0.204989	0.31511
ENSG00000157657	ZNF618	protein_coding	red	0.266744	0.187752	0.741734	1.44832e-05	-0.0631675	0.75918
ENSG00000244731	C4A	protein_coding	red	0.387089	0.0507449	0.739594	1.57963e-05	-0.0855596	0.677719
ENSG00000215374	FAM66B	lncRNA	red	0.656686	0.000268677	0.739206	1.60457e-05	0.219795	0.280641
ENSG00000186638	KIF24	protein_coding	red	0.333263	0.0961744	0.732338	2.10743e-05	-0.0644411	0.75447
ENSG00000152128	TMEM163	protein_coding	red	0.391218	0.0481216	0.732323	2.10871e-05	-0.142332	0.487931
ENSG00000227825	SLC9A7P1	transcribed_processed_pseudogene	red	0.639307	0.000438064	0.73224	2.11553e-05	0.270703	0.181037
ENSG00000120341	SEC16B	protein_coding	red	0.600843	0.00117092	0.730623	2.25308e-05	0.178803	0.382144
ENSG00000159173	TNNI1	protein_coding	red	0.624299	0.000652799	0.729708	2.33435e-05	0.129163	0.529444
ENSG00000105875	WDR91	protein_coding	red	0.371644	0.0615648	0.727263	2.56444e-05	-0.0941517	0.64732
ENSG00000185186	LINC00313	lncRNA	red	0.55269	0.00341078	0.727177	2.5729e-05	0.120745	0.556829
ENSG00000163638	ADAMTS9	protein_coding	red	0.380818	0.0549427	0.726644	2.62587e-05	0.0694079	0.736183
ENSG00000255920	AC006122.2	lncRNA	red	0.348492	0.0810291	0.725225	2.77143e-05	-0.0809681	0.694172
ENSG00000160439	RDH13	protein_coding	red	0.399812	0.0430032	0.723719	2.93379e-05	0.0370423	0.857426
ENSG00000137806	NDUFAF1	protein_coding	red	0.406857	0.0391367	0.722965	3.01824e-05	-0.0262622	0.898666
ENSG00000167912	AC090152.1	lncRNA	red	0.459573	0.0181768	0.720927	3.25719e-05	-0.0713054	0.729232
ENSG00000179542	SLITRK4	protein_coding	red	0.52906	0.0054523	0.719113	3.48391e-05	-0.0481213	0.815421
ENSG00000198892	SHISA4	protein_coding	red	0.533293	0.00502511	0.718583	3.55276e-05	0.0949293	0.644595
ENSG00000230454	U73166.1	lncRNA	red	0.691823	9.04639e-05	0.714909	4.06391e-05	0.219973	0.280241
ENSG00000166004	CEP295	protein_coding	red	0.343742	0.0855439	0.714023	4.19657e-05	0.132878	0.517566
ENSG00000273901	AC012313.9	lncRNA	red	0.427998	0.0291667	0.713254	4.31478e-05	0.237633	0.242427
ENSG00000091483	FH	protein_coding	red	0.387331	0.0505879	0.713142	4.33218e-05	-0.18412	0.367911
ENSG00000128928	IVD	protein_coding	red	0.447412	0.0219172	0.711037	4.67225e-05	-0.004688	0.981867
ENSG00000257800	FNBP1P1	processed_pseudogene	red	0.427773	0.0292608	0.710688	4.7308e-05	0.184618	0.366596
ENSG00000279948	AC008895.1	TEC	red	0.276447	0.171593	0.709084	5.00853e-05	-0.0349566	0.86538
ENSG00000114541	FRMD4B	protein_coding	red	0.184068	0.36805	0.708572	5.10028e-05	-0.123489	0.547833
ENSG00000116141	MARK1	protein_coding	red	0.586722	0.00162977	0.707821	5.23733e-05	-0.0300818	0.884019
ENSG00000224389	C4B	protein_coding	red	0.354044	0.0759841	0.706837	5.422e-05	-0.0961885	0.640191
ENSG00000215246	AC116351.1	lncRNA	red	0.444113	0.0230332	0.705113	5.75918e-05	-0.0868374	0.673166
ENSG00000187957	DNER	protein_coding	red	0.434425	0.0265797	0.703157	6.16426e-05	-0.0997691	0.627735
ENSG00000215447	BX322557.1	lncRNA	red	0.42971	0.0284585	0.70247	6.31241e-05	0.071173	0.729716
ENSG00000170775	GPR37	protein_coding	red	0.426918	0.0296205	0.699219	7.05686e-05	-0.181292	0.375442
ENSG00000234134	AL158835.2	lncRNA	red	0.324631	0.10565	0.699191	7.06357e-05	0.136027	0.507598
ENSG00000197879	MYO1C	protein_coding	red	0.723543	2.95329e-05	0.698944	7.12323e-05	0.348821	0.0807234
ENSG00000166068	SPRED1	protein_coding	red	0.305284	0.129377	0.698207	7.30411e-05	0.103129	0.616137
ENSG00000161558	TMEM143	protein_coding	red	0.615315	0.000820963	0.697416	7.50244e-05	-0.0374856	0.855738
ENSG00000115419	GLS	protein_coding	red	0.250373	0.217339	0.693848	8.45772e-05	-0.0682832	0.740312
ENSG00000227076	AL158166.1	lncRNA	red	0.365193	0.0665808	0.693783	8.47611e-05	-0.0522027	0.800064
ENSG00000249738	AC008691.1	lncRNA	red	0.480772	0.0129114	0.692926	8.72131e-05	-0.151451	0.460183
ENSG00000140876	NUDT7	protein_coding	red	0.324252	0.106081	0.692849	8.74381e-05	-0.052845	0.797654
ENSG00000253616	AC107959.3	lncRNA	red	0.54981	0.00361806	0.692355	8.88841e-05	0.0823222	0.689305
ENSG00000229207	SERPINH1P1	processed_pseudogene	red	0.390824	0.0483668	0.692295	8.90619e-05	0.0109795	0.957547
ENSG00000140459	CYP11A1	protein_coding	red	0.596258	0.00130582	0.692134	8.95374e-05	-0.0839622	0.683427
ENSG00000091127	PUS7	protein_coding	red	0.290569	0.149857	0.691686	9.08763e-05	-0.0895215	0.663637
ENSG00000064199	SPA17	protein_coding	red	0.357923	0.072604	0.687516	0.000104199	0.0813208	0.692903
ENSG00000205864	KRTAP5-6	protein_coding	red	0.396992	0.0446328	0.684862	0.000113551	0.0168586	0.934853
ENSG00000281920	AC007389.5	lncRNA	red	0.561621	0.00283112	0.682234	0.000123528	0.225796	0.267381
ENSG00000227671	AL390728.4	transcribed_unprocessed_pseudogene	red	0.350732	0.0789637	0.681122	0.00012798	0.0902016	0.661231
ENSG00000255052	FAM66D	lncRNA	red	0.632997	0.000519353	0.679906	0.000133006	0.0703983	0.732552
ENSG00000261175	LINC02188	lncRNA	red	0.445338	0.0226134	0.678806	0.000137701	0.118474	0.564327
ENSG00000277984	AP001264.1	unprocessed_pseudogene	red	0.46952	0.0155216	0.677234	0.000144667	0.20449	0.316315
ENSG00000232434	C9orf172	protein_coding	red	0.30809	0.125715	0.675394	0.000153208	-0.0606905	0.768365
ENSG00000257763	OR5BK1P	unprocessed_pseudogene	red	0.400328	0.0427097	0.67537	0.000153327	0.205032	0.315007
ENSG00000259967	AC087761.1	lncRNA	red	0.435175	0.0262901	0.67456	0.000157225	-0.186461	0.361747
ENSG00000229953	AL590666.2	lncRNA	red	0.418521	0.0333471	0.673982	0.000160066	0.0458643	0.823942
ENSG00000181773	GPR3	protein_coding	red	0.455978	0.0192234	0.673332	0.000163311	-0.0356127	0.862877
ENSG00000259904	ACTG1P15	processed_pseudogene	red	0.356634	0.0737143	0.673135	0.000164306	0.249199	0.219576
ENSG00000074695	LMAN1	protein_coding	red	0.470789	0.0152071	0.672957	0.000165206	0.114319	0.578159
ENSG00000171540	OTP	protein_coding	red	0.331253	0.0983222	0.671974	0.000170274	-0.00718058	0.972228
ENSG00000173041	ZNF680	protein_coding	red	0.423278	0.0311928	0.67027	0.000179387	-0.0692542	0.736746
ENSG00000132334	PTPRE	protein_coding	red	0.303352	0.131943	0.67005	0.000180594	-0.114128	0.578798
ENSG00000167595	PROSER3	protein_coding	red	0.386397	0.0511951	0.669649	0.000182809	0.215258	0.290937
ENSG00000246145	RRS1-AS1	lncRNA	red	0.465659	0.0165115	0.669272	0.000184916	-0.0546523	0.790882
ENSG00000104879	CKM	protein_coding	red	0.280059	0.165836	0.668924	0.000186879	-0.11566	0.573679
ENSG00000237399	PITRM1-AS1	lncRNA	red	0.374408	0.0595082	0.667665	0.00019414	0.165012	0.420495
ENSG00000249526	AC008667.1	lncRNA	red	0.714931	4.06072e-05	0.666093	0.000203546	0.0749578	0.715913
ENSG00000258999	AL136040.1	lncRNA	red	0.425195	0.0303565	0.661744	0.000231694	-0.143915	0.483053
ENSG00000152127	MGAT5	protein_coding	red	0.320025	0.11098	0.660288	0.000241857	-0.183124	0.370554
ENSG00000163945	UVSSA	protein_coding	red	0.575455	0.00209958	0.658636	0.000253851	0.287945	0.15374
ENSG00000206685	RNU6-1189P	snRNA	red	0.340764	0.0884707	0.657539	0.000262098	-0.0957534	0.641711
ENSG00000233154	LINC01762	lncRNA	red	0.523878	0.00601667	0.657531	0.00026216	-0.0777999	0.705604
ENSG00000074964	ARHGEF10L	protein_coding	red	0.544071	0.00406313	0.653652	0.000293255	0.0265788	0.89745
ENSG00000229534	HNRNPA1P53	processed_pseudogene	red	0.427306	0.0294567	0.653494	0.000294586	0.0201034	0.922348
ENSG00000184908	CLCNKB	protein_coding	red	0.267195	0.186979	0.653176	0.000297285	0.082811	0.687552
ENSG00000104691	UBXN8	protein_coding	red	0.381772	0.0542868	0.652915	0.000299515	0.0859335	0.676386
ENSG00000267346	EIF5AP3	processed_pseudogene	red	0.414296	0.0353594	0.652426	0.000303737	-0.0508581	0.805116
ENSG00000145002	FAM86B2	protein_coding	red	0.270192	0.181895	0.648963	0.000335114	-0.0414071	0.840826
ENSG00000261229	AC021483.2	lncRNA	red	0.308188	0.125588	0.646771	0.000356416	0.126706	0.53737
ENSG00000275367	AC092111.1	lncRNA	red	0.412749	0.03612	0.644957	0.000374925	0.0908886	0.658803
ENSG00000137869	CYP19A1	protein_coding	red	0.346258	0.0831297	0.64447	0.000380029	-0.0699971	0.734022
ENSG00000100987	VSX1	protein_coding	red	0.380194	0.0553745	0.644313	0.000381694	0.237224	0.243262
ENSG00000128833	MYO5C	protein_coding	red	0.330176	0.0994866	0.643085	0.000394904	-0.061098	0.766852
ENSG00000138759	FRAS1	protein_coding	red	0.324342	0.105978	0.642798	0.000398045	0.150752	0.462278
ENSG00000188338	SLC38A3	protein_coding	red	0.227511	0.263666	0.642635	0.00039984	-0.0733016	0.721943
ENSG00000137845	ADAM10	protein_coding	red	0.191652	0.34829	0.641897	0.000408054	0.0611696	0.766586
ENSG00000241129	AC093719.1	transcribed_processed_pseudogene	red	0.315696	0.116169	0.640132	0.000428298	0.169961	0.406494
ENSG00000109819	PPARGC1A	protein_coding	red	0.66858	0.000188837	0.637431	0.000460981	-0.0196854	0.923959
ENSG00000247877	AC021086.1	lncRNA	red	0.194667	0.340616	0.636038	0.00047867	-0.118762	0.563374
ENSG00000108557	RAI1	protein_coding	red	0.513981	0.00723166	0.632914	0.000520503	0.0970142	0.63731
ENSG00000196214	ZNF766	protein_coding	red	0.319823	0.111219	0.632421	0.000527386	0.0398136	0.846879
ENSG00000232303	DFFBP1	processed_pseudogene	red	0.246754	0.224281	0.631532	0.000540004	-0.106265	0.605388
ENSG00000196247	ZNF107	protein_coding	red	0.497084	0.00978037	0.631324	0.000542995	-0.0741609	0.718812
ENSG00000181790	ADGRB1	protein_coding	red	0.28533	0.157679	0.629032	0.000576905	-0.0932381	0.650527
ENSG00000275343	AC010999.1	lncRNA	red	0.618532	0.000756868	0.62656	0.000615519	0.204743	0.315705
ENSG00000257556	LINC02298	lncRNA	red	0.505114	0.00848896	0.624743	0.000645327	0.14756	0.47192
ENSG00000273419	AC004877.1	lncRNA	red	0.409125	0.0379526	0.624092	0.000656299	0.137468	0.503067
ENSG00000184619	KRBA2	protein_coding	red	0.597529	0.00126713	0.623263	0.00067052	0.313556	0.1188
ENSG00000147576	ADHFE1	protein_coding	red	0.340326	0.0889071	0.621742	0.000697301	0.0102203	0.96048
ENSG00000254978	ALG1L9P	transcribed_unprocessed_pseudogene	red	0.502049	0.00896394	0.620282	0.000723861	0.0310558	0.88029
ENSG00000183598	HIST2H3D	protein_coding	red	0.376782	0.0577838	0.619823	0.000732395	0.185853	0.363342
ENSG00000156103	MMP16	protein_coding	red	0.314618	0.117489	0.619018	0.000747586	0.0639445	0.756305
ENSG00000279419	AC004925.1	TEC	red	0.475634	0.0140543	0.618651	0.00075458	-0.167614	0.413101
ENSG00000275993	CU639417.1	protein_coding	red	0.347971	0.0815153	0.617383	0.000779244	-0.113871	0.579661
ENSG00000267348	AC011489.1	lncRNA	red	0.365923	0.0659982	0.616819	0.000790436	-0.11984	0.559811
ENSG00000230849	GOT2P2	processed_pseudogene	red	0.226511	0.265828	0.615184	0.000823668	-0.266938	0.187419
ENSG00000148468	FAM171A1	protein_coding	red	0.146725	0.474458	0.612407	0.000882885	-0.0237289	0.908398
ENSG00000117791	MARC2	protein_coding	red	0.441015	0.0241227	0.611836	0.000895518	-0.0769678	0.708617
ENSG00000249201	CTD-3080P12.3	lncRNA	red	0.296512	0.141325	0.6107	0.000921101	0.0313118	0.87931
ENSG00000228741	SPATA13	lncRNA	red	0.465157	0.016644	0.610295	0.000930365	0.241114	0.23539
ENSG00000255650	FAM222A-AS1	lncRNA	red	0.700475	6.76055e-05	0.60837	0.000975553	0.299791	0.13677
ENSG00000167637	ZNF283	protein_coding	red	0.404392	0.0404567	0.607984	0.000984826	0.332668	0.0968067
ENSG00000237664	LINC00316	lncRNA	red	0.142342	0.4879	0.607929	0.000986169	-0.0239588	0.907514
ENSG00000173040	EVC2	protein_coding	red	0.580116	0.00189279	0.607204	0.00100382	0.211634	0.29933
ENSG00000135314	KHDC1	protein_coding	red	0.461635	0.0175978	0.606797	0.00101386	0.147027	0.473539
ENSG00000184992	BRI3BP	protein_coding	red	0.435424	0.0261947	0.606389	0.00102402	0.0976145	0.635219
ENSG00000270882	HIST2H4A	protein_coding	red	0.314789	0.117279	0.605397	0.00104905	0.0681951	0.740635
ENSG00000140563	MCTP2	protein_coding	red	0.509785	0.00780555	0.602793	0.00111733	-0.198935	0.329924
ENSG00000173065	FAM222B	protein_coding	red	0.471446	0.0150464	0.602661	0.00112089	0.253926	0.210666
ENSG00000260420	LINC02182	lncRNA	red	0.204735	0.315724	0.601399	0.00115543	-0.100671	0.624612
ENSG00000230982	DSTNP1	processed_pseudogene	red	0.434914	0.0263906	0.600138	0.00119086	0.338794	0.0904474
ENSG00000242686	AC107464.1	lncRNA	red	0.56242	0.00278361	0.597842	0.00125777	-0.151034	0.461433
ENSG00000168502	MTCL1	protein_coding	red	0.5259	0.00579084	0.597681	0.00126258	0.187961	0.357826
ENSG00000227726	AP001271.1	lncRNA	red	0.241916	0.233789	0.596526	0.00129756	0.0491555	0.811523
ENSG00000279187	AC027601.5	TEC	red	0.51611	0.00695428	0.594745	0.00135317	0.148983	0.467608
ENSG00000264453	NA	NA	red	0.208288	0.307215	0.593676	0.00138749	0.00720969	0.972116
ENSG00000164976	MYORG	protein_coding	red	0.193018	0.344801	0.593394	0.00139669	-0.0781737	0.704252
ENSG00000122870	BICC1	protein_coding	red	0.22136	0.277143	0.592474	0.00142702	0.190623	0.350934
ENSG00000232259	AL158166.2	lncRNA	red	0.336267	0.0930305	0.590398	0.00149753	-0.146505	0.475129
ENSG00000012504	NR1H4	protein_coding	red	0.282592	0.16188	0.590194	0.00150462	-0.0715798	0.728229
ENSG00000262050	AC005696.1	lncRNA	red	0.597872	0.00125687	0.589597	0.00152553	0.0680426	0.741196
ENSG00000167562	ZNF701	protein_coding	red	0.520258	0.00643931	0.587352	0.00160643	0.117253	0.568376
ENSG00000111371	SLC38A1	protein_coding	red	0.515777	0.00699698	0.585516	0.00167528	0.280927	0.164473
ENSG00000175556	LONRF3	protein_coding	red	0.380632	0.0550706	0.582969	0.00177503	-0.176802	0.387579
ENSG00000196081	ZNF724	protein_coding	red	0.403949	0.0406976	0.582627	0.00178882	0.275891	0.172493
ENSG00000268670	AC016586.1	lncRNA	red	0.28688	0.155335	0.580726	0.00186707	0.306095	0.128311
ENSG00000119283	TRIM67	protein_coding	red	0.271573	0.179584	0.577239	0.00201824	-0.0511889	0.803872
ENSG00000132563	REEP2	protein_coding	red	0.337633	0.0916275	0.576808	0.00203763	0.125588	0.540993
ENSG00000105738	SIPA1L3	protein_coding	red	0.316838	0.114784	0.576772	0.00203926	0.031362	0.879118
ENSG00000164211	STARD4	protein_coding	red	0.393719	0.046585	0.575886	0.00207966	0.0794708	0.699567
ENSG00000232936	AL157400.2	lncRNA	red	0.306837	0.127342	0.575821	0.00208266	0.0226503	0.912546
ENSG00000112118	MCM3	protein_coding	red	0.563122	0.00274245	0.575545	0.00209537	0.107128	0.602445
ENSG00000203327	AC012358.1	lncRNA	red	0.315023	0.116993	0.573174	0.0022076	0.0724566	0.725026
ENSG00000271550	BNIP3P11	processed_pseudogene	red	0.458353	0.0185266	0.572026	0.0022638	-0.0351937	0.864475
ENSG00000185070	FLRT2	protein_coding	red	0.264907	0.190925	0.56881	0.00242768	0.149469	0.466142
ENSG00000215861	AC245297.1	unprocessed_pseudogene	red	0.25942	0.200624	0.566484	0.00255243	-0.0628732	0.76027
ENSG00000274750	HIST1H3E	protein_coding	red	0.505599	0.00841572	0.565969	0.0025808	0.519237	0.00656308
ENSG00000100321	SYNGR1	protein_coding	red	0.291163	0.148988	0.565489	0.00260747	-0.0731091	0.722645
ENSG00000104228	TRIM35	protein_coding	red	0.54283	0.00416525	0.565485	0.00260768	0.252675	0.212999
ENSG00000103978	TMEM87A	protein_coding	red	0.386581	0.0510752	0.565241	0.00262135	-0.0659639	0.748849
ENSG00000186481	ANKRD20A5P	transcribed_unprocessed_pseudogene	red	0.510045	0.00776892	0.562205	0.00279632	0.332834	0.0966296
ENSG00000169862	CTNND2	protein_coding	red	0.23735	0.243006	0.562048	0.00280567	0.0668673	0.74552
ENSG00000265554	AP005271.1	lncRNA	red	0.244204	0.22926	0.56024	0.00291482	-0.0696088	0.735446
ENSG00000144749	LRIG1	protein_coding	red	0.151621	0.459674	0.559721	0.00294685	-0.234857	0.248138
ENSG00000136449	MYCBPAP	protein_coding	red	0.711267	4.63389e-05	0.559537	0.00295823	0.357255	0.0731775
ENSG00000237172	B3GNT9	protein_coding	red	0.404868	0.040199	0.558166	0.00304453	0.282076	0.16268
ENSG00000232739	AL607028.1	lncRNA	red	0.145736	0.477474	0.557851	0.00306465	-0.102256	0.619142
ENSG00000156017	CARNMT1	protein_coding	red	0.184426	0.367103	0.556369	0.00316083	-0.294123	0.144712
ENSG00000183340	JRKL	protein_coding	red	0.268846	0.184166	0.55532	0.00323047	0.193724	0.343004
ENSG00000267201	LINC01775	lncRNA	red	0.323752	0.106652	0.554185	0.00330728	0.022016	0.914986
ENSG00000159263	SIM2	protein_coding	red	0.573464	0.0021936	0.550413	0.00357378	0.366779	0.0653196
ENSG00000105245	NUMBL	protein_coding	red	0.369425	0.0632565	0.550121	0.00359519	-0.0836695	0.684475
ENSG00000104140	RHOV	protein_coding	red	0.267018	0.187282	0.549072	0.0036729	-0.0998131	0.627582
ENSG00000214465	SMARCE1P6	processed_pseudogene	red	0.317313	0.114211	0.547373	0.00380175	-0.14465	0.480797
ENSG00000122574	WIPF3	protein_coding	red	0.511061	0.00762715	0.545513	0.00394713	-0.175758	0.390434
ENSG00000237025	AL121601.2	processed_pseudogene	red	0.508851	0.00793846	0.54388	0.0040787	0.205843	0.313054
ENSG00000119661	DNAL1	protein_coding	red	0.291191	0.148948	0.54362	0.00410002	0.248818	0.220304
ENSG00000223768	LINC00205	lncRNA	red	0.392453	0.0473578	0.54199	0.00423563	0.0595794	0.772496
ENSG00000148358	GPR107	protein_coding	red	0.209482	0.304387	0.538817	0.00451045	-0.109208	0.595378
ENSG00000005700	IBTK	protein_coding	red	0.291754	0.148128	0.533031	0.00505068	-0.00447413	0.982694
ENSG00000172828	CES3	protein_coding	red	0.304189	0.130828	0.532477	0.00510521	-0.0488377	0.81272
ENSG00000226306	NPY6R	transcribed_processed_pseudogene	red	0.589424	0.00153162	0.529828	0.00537259	-0.0203566	0.921374
ENSG00000088992	TESC	protein_coding	red	0.42181	0.0318451	0.528236	0.0055389	-0.012094	0.953242
ENSG00000065989	PDE4A	protein_coding	red	0.506931	0.00821743	0.528014	0.00556247	0.029729	0.88537
ENSG00000114378	HYAL1	protein_coding	red	0.353333	0.0766169	0.520613	0.00639684	-0.0278415	0.892605
ENSG00000010310	GIPR	protein_coding	red	0.445115	0.0226893	0.519539	0.00652622	0.217581	0.285636
ENSG00000143570	SLC39A1	protein_coding	red	0.485796	0.0118694	0.518629	0.00663765	0.0764326	0.710557
ENSG00000120137	PANK3	protein_coding	red	0.0927093	0.652386	0.518262	0.0066829	-0.024208	0.906556
ENSG00000176222	ZNF404	protein_coding	red	0.50747	0.00813824	0.51722	0.00681314	0.41922	0.0330237
ENSG00000267677	AC016229.2	lncRNA	red	0.396633	0.0448433	0.514349	0.00718302	-0.0450643	0.826967
ENSG00000279771	AP000997.3	TEC	red	0.470081	0.015382	0.513001	0.0073624	-0.0336601	0.870331
ENSG00000207336	RNU6-658P	snRNA	red	0.420534	0.0324216	0.511427	0.00757664	0.342734	0.0865263
ENSG00000187097	ENTPD5	protein_coding	red	0.250567	0.216971	0.508082	0.00804911	0.250362	0.217361
ENSG00000275183	LENG9	protein_coding	red	0.351437	0.0783228	0.505739	0.00839462	-0.0893351	0.664297
ENSG00000089091	DZANK1	protein_coding	red	0.33041	0.0992333	0.504981	0.00850902	0.168433	0.410789
ENSG00000253910	PCDHGB2	protein_coding	red	0.560827	0.00287898	0.498777	0.00949532	0.457086	0.0188959
ENSG00000267886	AC074135.1	lncRNA	red	0.112556	0.584075	0.497466	0.00971544	-0.136356	0.506562
ENSG00000146426	TIAM2	protein_coding	red	0.096526	0.639013	0.495567	0.010042	0.122787	0.550127
ENSG00000105737	GRIK5	protein_coding	red	0.563642	0.00271227	0.492824	0.0105295	-0.0527076	0.798169
ENSG00000280328	NA	NA	red	0.487152	0.0116005	0.491778	0.0107206	0.197161	0.334342
ENSG00000274798	AC025166.1	lncRNA	red	0.124911	0.543194	0.490408	0.0109751	-0.18987	0.352877
ENSG00000228126	FALEC	lncRNA	red	0.115732	0.573438	0.487178	0.0115953	0.0474639	0.8179
ENSG00000236136	ADORA2BP1	processed_pseudogene	red	0.113341	0.581437	0.486258	0.0117771	-0.130108	0.526409
ENSG00000224969	AL645608.2	lncRNA	red	0.13251	0.518735	0.484418	0.0121479	-0.0897893	0.662689
ENSG00000203280	AL022323.1	lncRNA	red	0.404888	0.0401883	0.480245	0.0130249	-0.00292748	0.988676
ENSG00000095015	MAP3K1	protein_coding	red	0.238471	0.24072	0.475113	0.0141747	0.0935239	0.649523
ENSG00000160007	ARHGAP35	protein_coding	red	0.215644	0.290053	0.47175	0.0149724	0.199628	0.328205
ENSG00000215146	BX322639.1	transcribed_unprocessed_pseudogene	red	0.121484	0.554398	0.471626	0.0150026	-0.168217	0.411398
ENSG00000256087	ZNF432	protein_coding	red	0.497279	0.0097472	0.471469	0.0150407	0.32334	0.107124
ENSG00000126464	PRR12	protein_coding	red	0.170611	0.404675	0.471078	0.0151361	0.0387359	0.850977
ENSG00000234771	SLC25A25-AS1	lncRNA	red	0.149797	0.465153	0.468732	0.0157196	-0.0624018	0.762016
ENSG00000153404	PLEKHG4B	protein_coding	red	0.0798304	0.69827	0.467315	0.0160807	-0.0903292	0.66078
ENSG00000102900	NUP93	protein_coding	red	0.167191	0.4143	0.462584	0.0173365	-0.0812739	0.693072
ENSG00000176293	ZNF135	protein_coding	red	0.117322	0.568146	0.458949	0.0183552	-0.174379	0.394222
ENSG00000239665	AL157392.3	lncRNA	red	0.0487625	0.813004	0.458778	0.0184042	0.0959159	0.641143
ENSG00000231940	RPS7P3	processed_pseudogene	red	0.391002	0.0482558	0.457051	0.0189062	0.186141	0.362585
ENSG00000224727	FCF1P7	processed_pseudogene	red	0.22047	0.279128	0.455854	0.0192605	-0.0935128	0.649562
ENSG00000231927	AC093734.1	lncRNA	red	0.144849	0.480189	0.455542	0.0193539	0.0929008	0.651713
ENSG00000018408	WWTR1	protein_coding	red	0.282822	0.161523	0.448681	0.0214999	-0.0163674	0.936748
ENSG00000244050	DEFB109F	transcribed_unprocessed_pseudogene	red	0.333395	0.0960347	0.44638	0.0222614	0.0113164	0.956245
ENSG00000172915	NBEA	protein_coding	red	0.109899	0.593036	0.444644	0.0228504	0.0458638	0.823944
ENSG00000229109	AL137847.1	lncRNA	red	0.335171	0.0941689	0.441807	0.0238403	0.0536426	0.794664
ENSG00000261124	AC135050.4	lncRNA	red	0.271349	0.179958	0.435233	0.026268	0.0951105	0.64396
ENSG00000229862	AL121972.2	lncRNA	red	0.302592	0.132963	0.429037	0.028735	-0.109338	0.594936
ENSG00000226121	AC009487.2	processed_pseudogene	red	0.26661	0.187983	0.407465	0.0388164	-0.164793	0.421122
ENSG00000189077	TMEM120A	protein_coding	red	0.493883	0.0103389	0.38978	0.0490226	-0.173629	0.396289
ENSG00000249430	NA	NA	red	0.0234611	0.909428	0.378286	0.0567121	-0.0767784	0.709304
ENSG00000113209	PCDHB5	protein_coding	red	0.197533	0.333411	0.377633	0.0571756	0.0333034	0.871694
ENSG00000221829	FANCG	protein_coding	red	0.116308	0.57152	0.364168	0.0674055	0.0593601	0.773312
ENSG00000143153	ATP1B1	protein_coding	red	0.37313	0.0604524	0.358172	0.0723912	-0.0569181	0.782413
ENSG00000062370	ZNF112	protein_coding	red	-0.0540843	0.793009	0.327132	0.102836	0.0994034	0.629002
ENSG00000268747	AC022432.1	processed_pseudogene	red	0.349708	0.0799028	0.317321	0.114201	-0.0165749	0.935947
ENSG00000196517	SLC6A9	protein_coding	red	-0.202904	0.320166	-0.369181	0.0634441	-0.0813538	0.692784
ENSG00000239521	GATS	protein_coding	red	-0.383056	0.0534142	-0.471274	0.0150884	-0.0546949	0.790722
ENSG00000171135	JAGN1	protein_coding	red	-0.368255	0.0641621	-0.472507	0.0147898	-0.140319	0.494168

## Sheet: CHOL_N
geneId	geneSymbol	geneBiotype	moduleColor	GS.stage_tnm_N	p.GS.stage_tnm_N	MM.red	p.MM.red	MM.royalblue	p.MM.royalblue	MM.green	p.MM.green	MM.orange	p.MM.orange
ENSG00000204188	GGNBP1	transcribed_unitary_pseudogene	green	0.73374	1.99471e-05	0.665245	0.000208786	0.0752615	0.714809	0.678413	0.000139414	0.0929864	0.651412
ENSG00000130270	ATP8B3	protein_coding	green	0.659533	0.000247272	0.604776	0.001065	0.136381	0.506484	0.706665	5.45482e-05	0.296124	0.141871
ENSG00000261069	AC124312.3	lncRNA	green	0.655645	0.000276897	0.25145	0.215301	0.265843	0.189304	0.653733	0.000292577	0.245651	0.226425
ENSG00000111412	C12orf49	protein_coding	green	0.615383	0.000819568	0.156845	0.444165	0.575124	0.00211497	0.72372	2.93371e-05	0.186422	0.361848
ENSG00000176933	TOB2P1	processed_pseudogene	green	0.613004	0.000869856	0.483027	0.0124346	0.294992	0.143474	0.84876	4.2738e-08	0.174879	0.392845
ENSG00000271547	AC117498.3	processed_pseudogene	green	0.611301	0.000907473	0.563829	0.00270152	0.151509	0.460008	0.742114	1.42606e-05	0.102168	0.619443
ENSG00000270246	NA	NA	green	0.601921	0.00114103	0.249018	0.219922	0.287478	0.154439	0.519954	0.00647596	0.223658	0.272059
ENSG00000230894	AL133284.1	lncRNA	green	0.592699	0.00141953	0.364537	0.067108	0.185477	0.36433	0.760431	6.53691e-06	0.341863	0.087382
ENSG00000163071	SPATA18	protein_coding	green	0.592385	0.00142997	0.179561	0.380095	0.00924534	0.964247	0.704875	5.8073e-05	0.426016	0.0300039
ENSG00000128487	SPECC1	protein_coding	green	0.59008	0.00150859	0.276328	0.171787	0.371194	0.061905	0.855994	2.46839e-08	0.175458	0.391255
ENSG00000157470	FAM81A	protein_coding	green	0.578531	0.00196105	0.416962	0.034079	0.318191	0.113158	0.864549	1.23971e-08	-0.0210529	0.918693
ENSG00000275529	SNORD116-4	snoRNA	green	0.569136	0.00241059	0.201997	0.32238	0.10752	0.60111	0.45475	0.0195922	0.306499	0.127782
ENSG00000106013	ANKRD7	protein_coding	green	0.56331	0.00273155	0.0999871	0.62698	0.430104	0.0282977	0.769873	4.25551e-06	0.154272	0.451768
ENSG00000072840	EVC	protein_coding	green	0.562057	0.00280514	0.368801	0.0637379	0.357699	0.072796	0.710971	4.68323e-05	0.18695	0.360465
ENSG00000203724	C1orf53	protein_coding	green	0.56195	0.00281149	0.411868	0.0365589	0.370677	0.0622976	0.672823	0.00016589	0.0373208	0.856365
ENSG00000188211	NCR3LG1	protein_coding	green	0.552772	0.00340505	0.575176	0.00211254	0.0174366	0.932624	0.729648	2.33973e-05	0.229749	0.258871
ENSG00000075391	RASAL2	protein_coding	green	0.550567	0.00356256	0.558817	0.00300331	0.376074	0.058294	0.705553	5.67153e-05	0.147504	0.472089
ENSG00000152556	PFKM	protein_coding	green	0.548648	0.00370467	0.31547	0.116445	0.352392	0.0774595	0.601749	0.00114576	0.125379	0.541674
ENSG00000072832	CRMP1	protein_coding	green	0.542644	0.00418071	0.344322	0.0849825	0.212446	0.297438	0.780557	2.55431e-06	0.264269	0.192036
ENSG00000205336	ADGRG1	protein_coding	green	0.541777	0.00425361	0.403146	0.0411375	0.224765	0.26963	0.634921	0.000493277	0.411459	0.036764
ENSG00000161249	DMKN	protein_coding	green	0.539359	0.00446248	0.424577	0.0306243	0.140757	0.492806	0.89815	4.84797e-10	0.0289311	0.888428
ENSG00000219607	PPP1R3G	protein_coding	green	0.535181	0.00484391	0.126267	0.538792	0.192349	0.346507	0.824701	2.20347e-07	0.330344	0.0993046
ENSG00000152527	PLEKHH2	protein_coding	green	0.528066	0.00555692	0.274464	0.174814	0.233237	0.251509	0.889448	1.23795e-09	0.114703	0.576876
ENSG00000239377	AC073111.1	lncRNA	green	0.526415	0.00573448	0.541124	0.0043092	0.263534	0.193322	0.600789	0.00117246	0.115472	0.574307
ENSG00000105409	ATP1A3	protein_coding	green	0.51597	0.00697223	0.513449	0.00730241	0.0141486	0.945309	0.864754	1.21872e-08	-0.090858	0.658911
ENSG00000204283	LINC01973	lncRNA	green	0.512307	0.00745626	0.591557	0.00145779	0.217118	0.286688	0.795443	1.19477e-06	-0.0780994	0.704521
ENSG00000258777	HIF1A-AS1	lncRNA	green	0.511654	0.0075454	0.184188	0.367732	0.18141	0.375128	0.838721	8.75025e-08	0.156301	0.445767
ENSG00000257647	AC124312.2	lncRNA	green	0.511205	0.00760721	0.154928	0.449825	0.189538	0.353733	0.730584	2.25651e-05	0.214425	0.292855
ENSG00000062485	CS	protein_coding	green	0.510486	0.00770709	0.375556	0.0586691	0.356333	0.0739756	0.839618	8.22404e-08	-0.0719374	0.726922
ENSG00000268521	VN1R83P	unprocessed_pseudogene	green	0.509457	0.00785206	0.351732	0.0780553	0.372504	0.060919	0.744654	1.28483e-05	-0.0172096	0.9335
ENSG00000235897	TM4SF19-AS1	lncRNA	green	0.50547	0.00843516	0.233577	0.250799	0.0881297	0.668572	0.959464	1.0557e-14	0.117138	0.568757
ENSG00000157833	GAREM2	protein_coding	green	0.504036	0.00865352	0.353298	0.0766477	0.0490792	0.81181	0.764435	5.46213e-06	0.231117	0.255968
ENSG00000115226	FNDC4	protein_coding	green	0.495342	0.0100811	0.206091	0.312459	0.352672	0.0772076	0.627148	0.000606137	0.419173	0.0330451
ENSG00000186073	C15orf41	protein_coding	green	0.490893	0.0108844	0.175892	0.390068	0.197715	0.332958	0.940319	9.91647e-13	0.0245854	0.905106
ENSG00000137404	NRM	protein_coding	green	0.489397	0.0111662	0.280239	0.165553	0.272982	0.177249	0.739455	1.58856e-05	0.171504	0.402183
ENSG00000260088	AL445483.1	lncRNA	green	0.487868	0.0114603	0.603916	0.00108742	-0.0104902	0.959437	0.774276	3.4597e-06	-0.104517	0.611368
ENSG00000182636	NDN	protein_coding	green	0.486948	0.0116405	0.13363	0.515175	0.343266	0.0860067	0.415374	0.0348372	-0.0535746	0.794919
ENSG00000173838	MARCH10	protein_coding	green	0.483645	0.0123065	0.194754	0.340394	0.420602	0.0323905	0.690796	9.35848e-05	0.301005	0.135111
ENSG00000262172	AC116025.2	lncRNA	green	0.483313	0.0123754	0.233036	0.251929	-0.042715	0.835864	0.587921	0.00158559	0.308745	0.124872
ENSG00000240370	RPL13P5	transcribed_processed_pseudogene	green	0.480949	0.0128734	-0.0604161	0.769385	0.406805	0.0391641	0.579087	0.00193684	0.546059	0.00390401
ENSG00000226756	AC007365.1	lncRNA	green	0.479541	0.0131779	0.0726897	0.724175	0.186297	0.362176	0.683059	0.000120315	0.210351	0.302339
ENSG00000270822	AC092032.1	processed_pseudogene	green	0.473914	0.014455	0.298985	0.137879	0.146313	0.475713	0.528345	0.00552745	-0.141538	0.490386
ENSG00000204941	PSG5	protein_coding	green	0.471664	0.0149933	0.0780734	0.704615	0.0676533	0.742627	0.757308	7.50225e-06	0.475159	0.014164
ENSG00000172476	RAB40A	protein_coding	green	0.471131	0.0151232	0.206584	0.311277	0.638817	0.00044395	0.389629	0.049118	0.31881	0.112419
ENSG00000233532	LINC00460	lncRNA	green	0.469013	0.0156487	0.16199	0.429172	0.0780555	0.70468	0.975743	2.4211e-17	0.0408733	0.842852
ENSG00000224078	SNHG14	lncRNA	green	0.468292	0.0158309	0.13719	0.503942	0.138946	0.498444	0.467873	0.0159376	0.348019	0.0814703
ENSG00000267069	AP005264.1	lncRNA	green	0.468258	0.0158397	0.117528	0.567461	0.139556	0.496541	0.713589	4.26294e-05	0.0842512	0.682393
ENSG00000272396	AC005392.3	lncRNA	green	0.464078	0.0169315	0.253218	0.211985	0.0115966	0.955163	0.819589	3.02499e-07	0.0891604	0.664916
ENSG00000182389	CACNB4	protein_coding	green	0.463313	0.0171381	0.180554	0.377422	0.107833	0.600047	0.974609	4.16487e-17	0.00572108	0.977872
ENSG00000259732	AC092757.2	lncRNA	green	0.461925	0.0175176	0.253633	0.211211	0.133225	0.516463	0.935109	2.6351e-12	0.0471905	0.818932
ENSG00000147408	CSGALNACT1	protein_coding	green	0.461819	0.017547	0.356937	0.0734518	0.310952	0.122059	0.811346	4.94081e-07	0.101332	0.622328
ENSG00000260634	AC012508.2	lncRNA	green	0.459429	0.0182179	0.0226595	0.912511	-0.0432036	0.834012	0.830454	1.52374e-07	0.249012	0.219933
ENSG00000204933	CD177P1	unprocessed_pseudogene	green	0.459271	0.018263	0.348052	0.0814397	0.00403129	0.984407	0.759389	6.84567e-06	0.122866	0.549867
ENSG00000131944	FAAP24	protein_coding	green	0.458355	0.0185262	0.389754	0.0490394	0.00699004	0.972965	0.519237	0.00656308	-0.000632769	0.997552
ENSG00000110851	PRDM4	protein_coding	green	0.456556	0.0190519	0.404197	0.0405626	0.344149	0.0851502	0.740792	1.50489e-05	0.00101996	0.996054
ENSG00000139178	C1RL	protein_coding	green	0.44742	0.0219146	0.199013	0.329729	0.57661	0.00204661	0.38013	0.0554186	0.356322	0.0739852
ENSG00000214510	SPINK13	protein_coding	green	0.446325	0.0222797	0.241644	0.234333	0.0732153	0.722258	0.976147	1.98348e-17	-0.0387509	0.85092
ENSG00000134138	MEIS2	protein_coding	green	0.445655	0.022506	0.618606	0.000755455	0.214615	0.292417	0.635934	0.000480012	-0.0533417	0.795791
ENSG00000205309	NT5M	protein_coding	green	0.444503	0.0228988	0.347695	0.0817736	0.0842658	0.682341	0.763108	5.79922e-06	0.13433	0.512956
ENSG00000146904	EPHA1	protein_coding	green	-0.441012	0.0241236	-0.120809	0.556617	-0.246388	0.224991	-0.440577	0.02428	-0.421898	0.0318058
ENSG00000226711	FAM66C	lncRNA	green	0.440007	0.0244861	0.404218	0.0405511	0.104816	0.610344	0.503287	0.00876952	0.207684	0.308651
ENSG00000225511	LINC00475	lncRNA	green	0.435376	0.0262132	0.0287361	0.889175	0.122564	0.550858	0.592122	0.00143877	0.521794	0.006257
ENSG00000137090	DMRT1	protein_coding	green	0.432975	0.0271464	0.1413	0.491124	0.0960637	0.640627	0.977813	8.38991e-18	-0.0281923	0.89126
ENSG00000086717	PPEF1	protein_coding	green	0.428644	0.0288978	0.202413	0.321362	0.159074	0.437635	0.78522	2.0262e-06	0.0247279	0.904558
ENSG00000274150	FADS2P1	unprocessed_pseudogene	green	0.420487	0.0324427	0.216371	0.28839	0.0686319	0.739031	0.952073	7.58326e-14	-0.0303553	0.882971
ENSG00000237686	AL109615.3	lncRNA	green	0.4197	0.0328024	0.253375	0.211692	0.227205	0.264328	0.399275	0.0433098	0.342197	0.0870532
ENSG00000115919	KYNU	protein_coding	green	0.419478	0.0329048	-0.0408906	0.842787	0.11054	0.590868	0.610468	0.000926384	0.619797	0.000732896
ENSG00000154240	CEP112	protein_coding	green	0.419022	0.033115	0.21161	0.299388	0.34501	0.084321	0.568306	0.00245426	0.360319	0.0705747
ENSG00000121903	ZSCAN20	protein_coding	green	0.417446	0.0338502	0.149847	0.465001	0.15767	0.441742	0.775876	3.20537e-06	0.0234914	0.909311
ENSG00000136425	CIB2	protein_coding	green	0.413938	0.0355343	0.106593	0.604272	0.325265	0.10493	0.612209	0.000887245	0.0389359	0.850217
ENSG00000163281	GNPDA2	protein_coding	green	0.410772	0.0371109	0.31651	0.11518	0.398882	0.0435353	0.463355	0.0171265	0.0555822	0.787403
ENSG00000196502	SULT1A1	protein_coding	green	0.410694	0.0371505	0.106858	0.603365	0.0196383	0.92414	0.616996	0.000786914	0.473368	0.0145842
ENSG00000223949	ROR1-AS1	lncRNA	green	0.408904	0.038067	0.084956	0.679874	0.0709918	0.73038	0.967665	7.31176e-16	-0.0228694	0.911703
ENSG00000150967	ABCB9	protein_coding	green	0.408599	0.0382246	0.0504664	0.806589	0.245481	0.226757	0.728395	2.45549e-05	0.148269	0.46977
ENSG00000152592	DMP1	protein_coding	green	0.408041	0.038515	0.099837	0.627499	0.0980051	0.633859	0.968001	6.46106e-16	-0.0207708	0.919779
ENSG00000248757	LINC02115	lncRNA	green	0.406893	0.0391177	0.0505801	0.806161	0.0590487	0.77447	0.93085	5.52523e-12	0.10032	0.625827
ENSG00000086570	FAT2	protein_coding	green	0.40533	0.0399505	0.0749195	0.716052	0.193215	0.344299	0.897069	5.47125e-10	0.150944	0.461703
ENSG00000147697	GSDMC	protein_coding	green	0.40278	0.0413388	0.212466	0.29739	0.102869	0.617031	0.857406	2.21001e-08	-0.0451274	0.826728
ENSG00000229886	AC068533.2	processed_pseudogene	green	0.402176	0.0416736	0.0465785	0.821243	0.135129	0.510429	0.780375	2.57723e-06	0.00649119	0.974894
ENSG00000238283	TBC1D3P1	transcribed_unprocessed_pseudogene	green	0.401611	0.0419882	0.0989431	0.630599	0.0724993	0.72487	0.968475	5.41463e-16	-0.0342289	0.868158
ENSG00000234405	Z69733.1	lncRNA	green	0.39689	0.0446925	0.166345	0.416699	0.526735	0.00569975	0.384808	0.0522418	0.320603	0.110301
ENSG00000158578	ALAS2	protein_coding	green	0.394012	0.0464073	-0.149711	0.465411	0.0750486	0.715583	0.535024	0.00485877	0.511539	0.00756115
ENSG00000156535	CD109	protein_coding	green	0.388243	0.0500004	0.0270608	0.895601	0.356945	0.0734456	0.755745	8.03149e-06	0.0357672	0.862287
ENSG00000225062	CATIP-AS1	lncRNA	green	0.3878	0.0502854	0.233914	0.250097	0.063283	0.758752	0.797881	1.04879e-06	0.047241	0.818742
ENSG00000001626	CFTR	protein_coding	green	0.385151	0.0520141	-0.0298624	0.884859	0.329054	0.100712	0.803491	7.71842e-07	0.0132632	0.948727
ENSG00000178568	ERBB4	protein_coding	green	0.381956	0.054161	0.0987469	0.631281	0.131873	0.520765	0.931048	5.34469e-12	-0.036153	0.860816
ENSG00000260196	AC124798.1	lncRNA	green	0.38062	0.0550793	0.311151	0.121807	-0.166422	0.416479	0.563012	0.00274888	0.241108	0.235403
ENSG00000177679	SRRM3	protein_coding	green	0.378899	0.0562798	0.298458	0.138608	0.134983	0.510892	0.682918	0.000120858	-0.05986	0.771452
ENSG00000226926	PDZPH1P	transcribed_unitary_pseudogene	green	0.374094	0.0597387	0.0544373	0.791687	0.033048	0.87267	0.949513	1.3973e-13	-0.0207961	0.919681
ENSG00000124523	SIRT5	protein_coding	green	0.37348	0.0601924	0.477635	0.0135996	0.19734	0.333893	0.681311	0.000127212	-0.0417086	0.839681
ENSG00000199836	RNU1-47P	snRNA	green	0.372536	0.0608954	0.139289	0.497374	0.19833	0.331426	0.808592	5.79064e-07	-0.0555593	0.787489
ENSG00000147614	ATP6V0D2	protein_coding	green	0.371552	0.0616345	0.0889893	0.665522	0.0592861	0.773587	0.942983	5.81321e-13	-0.0481317	0.815382
ENSG00000253671	AC027117.1	lncRNA	green	0.369837	0.0629396	0.0561254	0.785373	0.178768	0.382238	0.930594	5.76882e-12	0.0352068	0.864425
ENSG00000277144	AC092757.3	lncRNA	green	0.369118	0.0634931	0.13439	0.512768	0.0763079	0.71101	0.646061	0.000363557	0.210931	0.300978
ENSG00000165996	HACD1	protein_coding	green	0.3689	0.0636617	0.290424	0.150071	-0.0209987	0.918901	0.820972	2.77917e-07	-0.0877893	0.669781
ENSG00000198039	ZNF273	protein_coding	green	0.368548	0.0639344	0.539848	0.00441951	-0.0697574	0.734901	0.73307	2.04791e-05	-0.157048	0.443568
ENSG00000060138	YBX3	protein_coding	green	0.368052	0.0643204	0.0689249	0.737955	0.50982	0.00780057	0.413218	0.0358882	0.147562	0.471913
ENSG00000237223	SULT1C2P1	transcribed_unprocessed_pseudogene	green	0.363976	0.0675609	0.134567	0.512207	-0.0315779	0.878292	0.868021	9.24941e-09	-0.0199682	0.922869
ENSG00000234215	AC006012.1	lncRNA	green	0.363285	0.068123	0.257833	0.203491	0.0758981	0.712497	0.912464	8.49504e-11	-0.0985348	0.632018
ENSG00000168779	SHOX2	protein_coding	green	0.361177	0.0698581	0.447787	0.0217932	0.0451205	0.826754	0.809797	5.40398e-07	-0.149443	0.46622
ENSG00000006282	SPATA20	protein_coding	green	0.358412	0.0721863	0.100607	0.624835	-0.0455188	0.825248	0.702233	6.36435e-05	0.125833	0.5402
ENSG00000146166	LGSN	protein_coding	green	0.35744	0.0730186	0.0595711	0.772526	0.00415903	0.983913	0.927653	9.34633e-12	-0.0785593	0.702858
ENSG00000269985	AL021328.1	lncRNA	green	0.357209	0.0732178	0.310346	0.122826	0.158916	0.438096	0.590675	0.00148796	-0.103746	0.614015
ENSG00000112208	BAG2	protein_coding	green	0.356498	0.0738322	0.269406	0.183219	-0.0216575	0.916366	0.771239	3.99264e-06	-0.0263453	0.898347
ENSG00000107518	ATRNL1	protein_coding	green	0.356103	0.0741754	0.0112593	0.956466	0.0762864	0.711088	0.883867	2.16983e-09	0.0537202	0.794373
ENSG00000102034	ELF4	protein_coding	green	0.355234	0.0749351	0.0650217	0.752325	0.220177	0.279784	0.590292	0.00150122	0.00166551	0.993557
ENSG00000177138	FAM9B	protein_coding	green	0.354321	0.075739	0.0168197	0.935004	-0.00559713	0.978351	0.914993	6.05604e-11	-0.044016	0.830934
ENSG00000279205	AC092162.3	TEC	green	0.354261	0.0757922	0.0616443	0.764825	0.41576	0.0346517	0.705104	5.76104e-05	-0.0866681	0.673768
ENSG00000127948	POR	protein_coding	green	0.351214	0.0785246	0.313333	0.119076	-0.0147662	0.942925	0.742397	1.40964e-05	-0.251688	0.214852
ENSG00000158813	EDA	protein_coding	green	0.350243	0.0794116	0.238937	0.239776	0.160853	0.432461	0.427501	0.0293746	0.194695	0.340544
ENSG00000243137	PSG4	protein_coding	green	0.347312	0.0821339	0.0569907	0.782141	0.0900469	0.661778	0.914756	6.25372e-11	-0.0266803	0.897061
ENSG00000182952	HMGN4	protein_coding	green	0.347085	0.0823477	0.398953	0.0434942	0.254824	0.209003	0.6092	0.000955848	0.11943	0.561166
ENSG00000237307	SRRM1P3	processed_pseudogene	green	0.343303	0.0859706	-0.0638671	0.756591	0.0458234	0.824096	0.825233	2.13076e-07	0.22392	0.271481
ENSG00000228271	LINC02048	lncRNA	green	0.342329	0.0869236	0.18374	0.368919	-0.0604907	0.769108	0.649213	0.000332754	0.0911738	0.657796
ENSG00000227036	LINC00511	lncRNA	green	0.342245	0.0870055	0.0962262	0.640059	0.49124	0.0108199	0.47268	0.0147482	0.0148657	0.942541
ENSG00000248685	LINC02484	lncRNA	green	0.340765	0.0884692	0.0517777	0.80166	0.0258185	0.900369	0.83168	1.40608e-07	-0.0849071	0.680049
ENSG00000115295	CLIP4	protein_coding	green	0.340611	0.0886228	-0.00588013	0.977257	0.173887	0.395576	0.758782	7.03181e-06	0.173713	0.396059
ENSG00000131473	ACLY	protein_coding	green	0.340403	0.0888298	0.317838	0.11358	0.174982	0.392564	0.608883	0.000963317	0.193994	0.342319
ENSG00000257151	PWAR6	lncRNA	green	0.339279	0.0899571	0.0139774	0.94597	0.0876451	0.670293	0.567984	0.00247135	0.238273	0.241123
ENSG00000169515	CCDC8	protein_coding	green	0.337456	0.0918082	0.265799	0.189381	0.0464845	0.821598	0.585587	0.00167259	-0.0838638	0.68378
ENSG00000144550	CPNE9	protein_coding	green	0.336983	0.0922931	0.366936	0.0651954	0.0227475	0.912172	0.623777	0.000661681	0.198948	0.32989
ENSG00000236683	HMGA1P1	processed_pseudogene	green	0.336752	0.0925311	0.353911	0.0761019	0.00828836	0.967946	0.554101	0.00331302	0.386779	0.0509465
ENSG00000044090	CUL7	protein_coding	green	0.336562	0.0927264	0.170492	0.405008	0.033937	0.869273	0.700629	6.72499e-05	0.171819	0.401308
ENSG00000241634	AC069499.1	processed_pseudogene	green	0.332922	0.096536	0.0753337	0.714547	0.0877096	0.670064	0.849055	4.18166e-08	-0.0648359	0.753011
ENSG00000147509	RGS20	protein_coding	green	0.332844	0.0966188	0.0302423	0.883404	0.00713367	0.97241	0.889808	1.19266e-09	0.0280397	0.891845
ENSG00000135253	KCP	protein_coding	green	0.3293	0.100442	-0.0291054	0.88776	0.00252161	0.990246	0.737915	1.69003e-05	0.252189	0.21391
ENSG00000142959	BEST4	protein_coding	green	0.32712	0.102849	0.0383892	0.852297	-0.255381	0.207975	0.372963	0.0605766	0.199287	0.329049
ENSG00000229020	AKR7A2P1	processed_pseudogene	green	0.32373	0.106678	-0.0751893	0.715071	0.084872	0.680174	0.550552	0.00356368	-0.0796693	0.698851
ENSG00000183098	GPC6	protein_coding	green	0.321602	0.109133	0.161728	0.429929	0.280538	0.165082	0.663727	0.000218467	-0.066769	0.745882
ENSG00000104213	PDGFRL	protein_coding	green	0.321424	0.109341	0.0529729	0.797174	0.305425	0.129191	0.672029	0.000169989	-0.0698861	0.734429
ENSG00000111716	LDHB	protein_coding	green	0.320158	0.110824	-0.0223543	0.913684	0.117832	0.566454	0.816034	3.74891e-07	0.00276444	0.989307
ENSG00000035862	TIMP2	protein_coding	green	0.319351	0.111777	-0.0232559	0.910217	0.288017	0.153632	0.623575	0.000665134	0.271781	0.179238
ENSG00000183171	BX322650.1	processed_pseudogene	green	0.319297	0.111841	0.238264	0.241142	-0.0524299	0.799212	0.789252	1.65083e-06	0.0518186	0.801507
ENSG00000243335	KCTD7	protein_coding	green	0.31425	0.117942	0.320877	0.10998	-0.00457825	0.982291	0.725367	2.75651e-05	0.0415972	0.840104
ENSG00000249346	LINC01016	lncRNA	green	0.30875	0.124865	0.120296	0.55831	0.0232999	0.910047	0.861231	1.62797e-08	-0.0626721	0.761015
ENSG00000226539	AC012512.1	processed_pseudogene	green	0.307948	0.125899	0.0351169	0.864768	0.00994512	0.961543	0.844387	5.87559e-08	-0.0607517	0.768138
ENSG00000197891	SLC22A12	protein_coding	green	0.3053	0.129357	0.0273484	0.894497	-0.103054	0.616395	0.74312	1.36852e-05	-0.0813147	0.692925
ENSG00000183929	DUSP5P1	processed_pseudogene	green	0.302288	0.133373	0.232002	0.254099	0.0472627	0.81866	0.753778	8.74496e-06	-0.00129771	0.99498
ENSG00000272899	AC025594.2	protein_coding	green	0.301811	0.134017	-0.0284461	0.890287	-0.119517	0.560879	0.708068	5.19185e-05	0.128419	0.531837
ENSG00000205794	AC098591.1	transcribed_processed_pseudogene	green	0.300685	0.135546	0.15038	0.463397	0.299002	0.137856	0.638262	0.000450709	-0.110365	0.591459
ENSG00000247809	NR2F2-AS1	lncRNA	green	0.300578	0.135692	-0.194441	0.341185	0.141388	0.49085	0.481777	0.0126971	0.258616	0.202073
ENSG00000266750	MIR4645	miRNA	green	0.300125	0.136312	-0.0176325	0.931869	0.0260492	0.899483	0.745638	1.23352e-05	0.227237	0.264258
ENSG00000002079	MYH16	transcribed_unitary_pseudogene	green	0.299685	0.136915	0.109206	0.595386	0.0767987	0.70923	0.611606	0.000900645	0.144714	0.480602
ENSG00000230438	SERPINB9P1	lncRNA	green	0.297408	0.140069	0.0644417	0.754467	0.0121326	0.953092	0.637961	0.000454407	0.261827	0.19633
ENSG00000235314	LINC00957	lncRNA	green	0.297056	0.140562	0.0712454	0.729452	0.0380057	0.853757	0.650382	0.000321927	0.0195851	0.924345
ENSG00000149925	ALDOA	protein_coding	green	0.295071	0.143362	0.150546	0.462898	-0.0393211	0.848751	0.702387	6.33052e-05	0.0440327	0.830871
ENSG00000261143	ADAMTS7P3	transcribed_unprocessed_pseudogene	green	0.293468	0.145651	0.412802	0.0360937	0.000123308	0.999523	0.452925	0.0201507	-0.0996432	0.628171
ENSG00000143369	ECM1	protein_coding	green	0.293291	0.145905	0.000350803	0.998643	0.0915484	0.656475	0.688735	0.000100138	0.0362947	0.860276
ENSG00000132470	ITGB4	protein_coding	green	0.290823	0.149485	0.182843	0.371301	0.185885	0.363258	0.760991	6.37596e-06	0.0385422	0.851715
ENSG00000116830	TTF2	protein_coding	green	0.28964	0.151223	0.269059	0.183805	0.12334	0.54832	0.450406	0.0209429	0.154901	0.449903
ENSG00000182199	SHMT2	protein_coding	green	0.289271	0.15177	-0.0670392	0.744887	0.101044	0.623323	0.803562	7.68795e-07	0.123716	0.547091
ENSG00000107551	RASSF4	protein_coding	green	0.288145	0.153441	0.223654	0.272066	0.192511	0.346094	0.68678	0.00010672	-0.0927582	0.652214
ENSG00000136999	NOV	protein_coding	green	0.283878	0.159896	0.0182819	0.929366	0.259404	0.200653	0.79481	1.23556e-06	-0.059524	0.772702
ENSG00000110063	DCPS	protein_coding	green	0.283772	0.16006	0.00756312	0.97075	0.0923642	0.653601	0.71846	3.56885e-05	-0.116538	0.570752
ENSG00000180044	C3orf80	protein_coding	green	0.279998	0.165932	-0.0173423	0.932988	0.314544	0.11758	0.609382	0.000951559	0.181915	0.373777
ENSG00000241770	AC104411.1	lncRNA	green	0.276431	0.17162	0.232016	0.254071	-0.0398329	0.846805	0.639976	0.00043013	-0.10883	0.596661
ENSG00000171060	C8orf74	protein_coding	green	0.275595	0.172972	-0.059455	0.772958	0.313943	0.118321	0.598807	0.00122927	0.189354	0.35421
ENSG00000260657	AC107871.2	lncRNA	green	0.275202	0.173611	0.123671	0.547238	0.0520589	0.800604	0.699612	6.96296e-05	-0.109122	0.595671
ENSG00000270919	AC108451.2	lncRNA	green	0.274478	0.174791	0.358585	0.0720388	0.351419	0.0783388	0.502306	0.00892334	-0.150811	0.462103
ENSG00000139055	ERP27	protein_coding	green	0.274473	0.1748	0.469067	0.0156351	0.107213	0.602156	0.543302	0.00412618	-0.126444	0.538219
ENSG00000106683	LIMK1	protein_coding	green	0.274223	0.175208	0.116575	0.57063	0.0838203	0.683935	0.76749	4.75134e-06	-0.170787	0.404184
ENSG00000115112	TFCP2L1	protein_coding	green	0.27226	0.178443	0.315295	0.116659	0.145287	0.478847	0.626024	0.000624183	-0.00199373	0.992288
ENSG00000117148	ACTL8	protein_coding	green	0.268115	0.185409	-0.00137945	0.994664	-0.0510946	0.804227	0.773951	3.51351e-06	-0.0743701	0.718051
ENSG00000113249	HAVCR1	protein_coding	green	0.267766	0.186003	0.0419626	0.838718	0.0708291	0.730975	0.823229	2.41646e-07	-0.0128966	0.950142
ENSG00000112541	PDE10A	protein_coding	green	0.267504	0.18645	0.00830949	0.967864	0.0889804	0.665554	0.801	8.8548e-07	-0.0989313	0.63064
ENSG00000129667	RHBDF2	protein_coding	green	0.266924	0.187444	0.38017	0.0553913	0.0187404	0.927599	0.633764	0.000508827	-0.0403938	0.844674
ENSG00000279069	AC015813.5	TEC	green	0.265625	0.189682	0.199546	0.328409	-0.0194369	0.924916	0.501872	0.0089921	0.227143	0.264462
ENSG00000188981	MSANTD1	protein_coding	green	0.263838	0.192789	0.071891	0.727091	-0.0253625	0.902121	0.67018	0.00017988	-0.0746988	0.716855
ENSG00000204052	LRRC73	protein_coding	green	0.261823	0.196336	0.0460873	0.823099	-0.00605912	0.976565	0.588884	0.00155083	-0.102442	0.618498
ENSG00000240625	RN7SL403P	misc_RNA	green	0.260895	0.197985	-0.059398	0.77317	0.113139	0.582116	0.668116	0.000191512	0.0870922	0.672259
ENSG00000169435	RASSF6	protein_coding	green	0.259991	0.199599	-0.124073	0.545926	0.101305	0.622421	0.700599	6.73194e-05	-0.0309472	0.880705
ENSG00000157827	FMNL2	protein_coding	green	0.257887	0.203392	-0.0324546	0.874938	0.0521581	0.800232	0.762856	5.86534e-06	0.0653797	0.751003
ENSG00000248593	DSTNP2	transcribed_unprocessed_pseudogene	green	0.25703	0.204952	-0.234364	0.249161	0.200716	0.325521	0.430203	0.028257	0.483065	0.0124268
ENSG00000182752	PAPPA	protein_coding	green	0.252885	0.212607	-0.0774945	0.70671	0.0778754	0.705331	0.645556	0.000368716	0.0375289	0.855572
ENSG00000008394	MGST1	protein_coding	green	0.251808	0.214627	-0.0312325	0.879613	0.0846666	0.680908	0.576156	0.00206729	0.247647	0.222554
ENSG00000270773	AC137695.2	processed_pseudogene	green	0.251743	0.214749	0.0431105	0.834365	0.400527	0.0425974	0.653544	0.000294163	-0.114864	0.576337
ENSG00000172927	MYEOV	protein_coding	green	0.249613	0.218785	-0.09028	0.660953	0.429137	0.0286938	0.431885	0.027579	0.193664	0.343156
ENSG00000182379	NXPH4	protein_coding	green	0.245187	0.227332	0.160946	0.432191	0.0504738	0.806561	0.729733	2.33207e-05	-0.0863529	0.674891
ENSG00000279858	AC068880.4	TEC	green	0.244335	0.229002	0.0306436	0.881868	0.0320596	0.876449	0.690182	9.54956e-05	0.0205034	0.920808
ENSG00000275703	U47924.3	lncRNA	green	0.243518	0.230612	-0.0320762	0.876385	0.095602	0.642241	0.636823	0.000468635	0.182032	0.373463
ENSG00000256894	AC022509.3	lncRNA	green	0.243183	0.231274	0.253416	0.211615	0.252192	0.213907	0.527923	0.0055721	0.0117049	0.954744
ENSG00000163576	EFHB	protein_coding	green	0.240674	0.236272	0.0616524	0.764795	0.0350701	0.864947	0.759411	6.83916e-06	0.00693509	0.973178
ENSG00000197106	SLC6A17	protein_coding	green	0.239892	0.237845	-0.0137649	0.94679	-0.0105224	0.959312	0.687822	0.000103165	-0.0991116	0.630015
ENSG00000176595	KBTBD11	protein_coding	green	0.238935	0.239779	0.155653	0.447678	-0.0704087	0.732514	0.871876	6.61639e-09	-0.156091	0.446387
ENSG00000131711	MAP1B	protein_coding	green	0.232153	0.253781	-0.00266888	0.989676	0.134145	0.513544	0.586997	0.00161955	-0.0788717	0.70173
ENSG00000106526	ACTR3C	protein_coding	green	0.23185	0.25442	0.0429157	0.835103	0.106905	0.603205	0.664901	0.000210947	0.0154497	0.940288
ENSG00000226496	LINC00323	lncRNA	green	0.230881	0.256466	0.114321	0.578151	-0.0213707	0.917469	0.847776	4.59515e-08	-0.0890705	0.665235
ENSG00000146267	FAXC	protein_coding	green	0.227867	0.2629	0.0161168	0.937714	0.29711	0.140486	0.561124	0.00286098	0.163785	0.424006
ENSG00000274444	AC078909.2	lncRNA	green	0.227636	0.263397	0.317068	0.114506	0.0589704	0.774762	0.647887	0.000345429	-0.014724	0.943088
ENSG00000139800	ZIC5	protein_coding	green	0.226217	0.266466	0.285599	0.157271	-0.0800235	0.697574	0.495634	0.0100303	0.0338401	0.869643
ENSG00000257062	AC022335.1	protein_coding	green	0.22401	0.271284	0.00461333	0.982156	0.00724857	0.971966	0.576169	0.00206666	0.0472524	0.818699
ENSG00000246022	ALDH1L1-AS2	lncRNA	green	0.22308	0.273331	0.00741926	0.971306	0.0100345	0.961197	0.766472	4.97829e-06	-0.0675169	0.743129
ENSG00000126603	GLIS2	protein_coding	green	0.221823	0.276113	0.172374	0.399765	0.415194	0.0349236	0.466088	0.0163991	0.093444	0.649804
ENSG00000272620	AFAP1-AS1	lncRNA	green	0.221646	0.276507	0.236785	0.244163	0.139031	0.498179	0.666048	0.000203822	0.0619324	0.763756
ENSG00000225298	LINC00113	lncRNA	green	0.218753	0.282985	-0.0304956	0.882434	-0.100298	0.625902	0.683081	0.00012023	-0.0405743	0.843988
ENSG00000225791	TRAM2-AS1	lncRNA	green	0.217549	0.285708	0.114208	0.578532	0.0873262	0.671427	0.64188	0.000408245	0.00528577	0.979555
ENSG00000131730	CKMT2	protein_coding	green	0.214439	0.292821	0.0470744	0.819371	-0.0113801	0.955999	0.625346	0.000635304	-0.045419	0.825625
ENSG00000223392	CLDN10-AS1	lncRNA	green	0.210958	0.300914	-0.0198678	0.923256	0.0502885	0.807258	0.609892	0.000939663	0.140263	0.494343
ENSG00000243056	EIF4EBP3	protein_coding	green	0.208688	0.306266	0.254295	0.209982	-0.00399772	0.984536	0.440555	0.024288	-0.104477	0.611507
ENSG00000261502	AC040174.1	lncRNA	green	0.207134	0.309963	0.0140204	0.945804	-0.0299327	0.88459	0.726213	2.66936e-05	-0.0713079	0.729223
ENSG00000237974	AC000111.2	processed_pseudogene	green	0.206736	0.310914	-0.104961	0.60985	0.0212092	0.918091	0.635642	0.000483808	-0.0545502	0.791264
ENSG00000175711	B3GNTL1	protein_coding	green	0.205557	0.313741	0.273781	0.175934	0.154285	0.45173	0.660677	0.000239105	-0.0324838	0.874827
ENSG00000232677	LINC00665	lncRNA	green	0.202655	0.320772	0.274345	0.17501	0.190085	0.35232	0.522822	0.00613742	-0.00137542	0.994679
ENSG00000137171	KLC4	protein_coding	green	0.202037	0.32228	-0.0957447	0.641742	-0.183522	0.369498	0.548264	0.00373367	0.159116	0.437515
ENSG00000007062	PROM1	protein_coding	green	0.20115	0.324456	-0.0654857	0.750612	0.282313	0.162312	0.726368	2.65358e-05	-0.0577715	0.779229
ENSG00000244515	KRT18P34	processed_pseudogene	green	0.20112	0.324529	0.114237	0.578435	-0.0649699	0.752516	0.681792	0.000125282	-0.117128	0.568792
ENSG00000146005	PSD2	protein_coding	green	0.197687	0.333028	0.158725	0.438654	-0.154625	0.450721	0.699281	7.04211e-05	-0.0661583	0.748132
ENSG00000167363	FN3K	protein_coding	green	0.195564	0.33835	0.0110603	0.957234	-0.110507	0.59098	0.781719	2.41227e-06	-0.0176428	0.93183
ENSG00000050344	NFE2L3	protein_coding	green	0.190887	0.350254	0.204793	0.315584	0.421053	0.0321861	0.493643	0.0103819	-0.141621	0.490129
ENSG00000107562	CXCL12	protein_coding	green	0.185861	0.363319	-0.0600348	0.770802	-0.208359	0.307045	0.496166	0.00993804	-0.129089	0.529681
ENSG00000122133	PAEP	protein_coding	green	0.185276	0.36486	-0.0354482	0.863504	-0.0901039	0.661576	0.669653	0.000182785	-0.0545589	0.791231
ENSG00000279539	AC006486.2	TEC	green	0.181679	0.374407	0.304548	0.13035	0.202167	0.321962	0.449154	0.0213459	-0.104167	0.612571
ENSG00000182240	BACE2	protein_coding	green	0.177573	0.385479	0.178031	0.384235	0.141967	0.489057	0.785918	1.95622e-06	-0.177832	0.384776
ENSG00000241962	AC079447.1	protein_coding	green	0.177262	0.386326	-0.0915789	0.656367	-0.0874434	0.67101	0.710419	4.77642e-05	-0.0251962	0.902759
ENSG00000228510	AL359091.1	processed_pseudogene	green	0.17508	0.392293	0.183459	0.369665	0.245499	0.226721	0.622948	0.000675986	-0.14846	0.46919
ENSG00000029559	IBSP	protein_coding	green	0.174708	0.393315	0.0405391	0.844122	0.0400912	0.845824	0.695626	7.9691e-05	-0.0480803	0.815575
ENSG00000067225	PKM	protein_coding	green	0.174544	0.393768	0.250006	0.218037	-0.073139	0.722536	0.432871	0.0271874	0.0362334	0.86051
ENSG00000224081	SLC44A3-AS1	transcribed_processed_pseudogene	green	0.163243	0.425562	-0.062433	0.761901	0.107934	0.599703	0.742888	1.38162e-05	-0.0808438	0.694619
ENSG00000139445	FOXN4	protein_coding	green	0.158051	0.440627	0.0276919	0.893179	-0.0649351	0.752645	0.633136	0.000517437	-0.106122	0.605878
ENSG00000130821	SLC6A8	protein_coding	green	0.155406	0.44841	0.0256433	0.901042	-0.198548	0.330883	0.667183	0.000196984	-0.127273	0.535536
ENSG00000228445	UGT1A2P	unprocessed_pseudogene	green	0.155299	0.448725	-0.12496	0.543037	-0.00806533	0.968808	0.486147	0.0117993	0.187929	0.357909
ENSG00000188372	ZP3	protein_coding	green	0.15514	0.449195	0.0385832	0.851559	0.0688762	0.738134	0.705588	5.66444e-05	-0.0474407	0.817988
ENSG00000224812	TMEM72-AS1	lncRNA	green	0.15211	0.458209	0.185438	0.364433	0.0328057	0.873596	0.655344	0.000279316	-0.0424535	0.836855
ENSG00000159202	UBE2Z	protein_coding	green	0.142659	0.486921	0.043806	0.83173	0.183191	0.370375	0.561099	0.00286251	0.175384	0.391459
ENSG00000239670	AL355864.2	unprocessed_pseudogene	green	0.141219	0.491374	-0.144662	0.48076	-0.0524784	0.799029	0.706445	5.49705e-05	-0.0628882	0.760214
ENSG00000116176	TPSG1	protein_coding	green	0.141048	0.491906	0.0424174	0.836992	0.0339485	0.869229	0.668567	0.000188912	-0.0845066	0.68148
ENSG00000258857	AL359397.1	lncRNA	green	0.137896	0.501729	-0.0455462	0.825144	-0.0959784	0.640925	0.669175	0.000185464	-0.101425	0.622006
ENSG00000169710	FASN	protein_coding	green	0.130478	0.525224	0.138028	0.501313	-0.103753	0.61399	0.544659	0.00401549	0.0588967	0.775036
ENSG00000116883	AL591845.1	lncRNA	green	0.128623	0.531181	-0.0335662	0.870689	-0.0982826	0.632894	0.584264	0.00172369	-0.0373686	0.856183
ENSG00000148123	PLPPR1	protein_coding	green	0.128121	0.532798	0.0908112	0.659077	-0.121126	0.555577	0.696691	7.68845e-05	-0.112242	0.585131
ENSG00000267426	AC087289.3	protein_coding	green	0.127512	0.534763	-0.0146951	0.9432	-0.240125	0.237377	0.626496	0.000616559	-0.0695434	0.735685
ENSG00000111671	SPSB2	protein_coding	green	0.124254	0.545335	-0.246901	0.223997	-0.150438	0.463223	0.623581	0.000665028	0.117722	0.56682
ENSG00000159251	ACTC1	protein_coding	green	0.123042	0.549294	0.058169	0.777747	-0.0683961	0.739897	0.495918	0.00998097	-0.016941	0.934535
ENSG00000233183	AL138889.1	lncRNA	green	0.120573	0.557396	-0.00652941	0.974746	-0.152521	0.456981	0.587401	0.00160462	-0.0955909	0.64228
ENSG00000260658	AC138305.1	lncRNA	green	0.117989	0.565933	-0.0176522	0.931793	-0.00191111	0.992607	0.629214	0.000574148	-0.120216	0.558572
ENSG00000115041	KCNIP3	protein_coding	green	0.0968503	0.637881	-0.0239138	0.907687	0.0210506	0.918701	0.607686	0.000992054	-0.10817	0.5989
ENSG00000130711	PRDM12	protein_coding	green	0.0959288	0.641098	0.106886	0.603271	-0.0653763	0.751016	0.516172	0.00694623	-0.0885698	0.66701
ENSG00000254987	AP002989.1	lncRNA	green	0.0946429	0.645598	-0.100634	0.624741	0.0666081	0.746474	0.627231	0.000604833	-0.071131	0.72987
ENSG00000251161	AC020661.1	lncRNA	green	0.0915956	0.656309	0.101776	0.620797	-0.0708891	0.730755	0.461291	0.0176934	0.0739818	0.719464
ENSG00000254966	AC103974.1	lncRNA	green	0.0906668	0.659586	-0.0270297	0.89572	-0.0278599	0.892535	0.577546	0.00200453	-0.0911969	0.657715
ENSG00000227051	C14orf132	protein_coding	green	0.0898534	0.662463	0.157436	0.442431	0.250741	0.216641	0.522599	0.00616327	-0.0216513	0.916389
ENSG00000240230	COX19	protein_coding	green	0.0870349	0.672463	0.209514	0.304311	-0.244591	0.228499	0.446196	0.0223231	-0.150816	0.462086
ENSG00000243678	NME2	protein_coding	green	0.0845525	0.681316	-0.0107506	0.958431	-0.147825	0.471116	0.513298	0.00732259	-0.102329	0.618889
ENSG00000067601	PMS2P4	transcribed_unprocessed_pseudogene	green	0.0790725	0.701004	0.0442783	0.829941	0.0959447	0.641043	0.440781	0.0242065	-0.250703	0.216713
ENSG00000075618	FSCN1	protein_coding	green	0.0748469	0.716316	0.0473752	0.818235	-0.0606054	0.768681	0.470398	0.0153033	-0.231108	0.255985
ENSG00000183647	ZNF530	protein_coding	green	-0.0738468	0.719956	0.205042	0.314982	-0.184408	0.36715	-0.480205	0.0130336	0.213862	0.294153
ENSG00000164778	EN2	protein_coding	green	0.0676096	0.742788	-0.0254342	0.901845	0.0970794	0.637083	0.568342	0.00245237	-0.0433684	0.833387
ENSG00000122643	NT5C3A	protein_coding	green	0.0667983	0.745774	-0.00514702	0.980092	-0.214304	0.293134	0.55173	0.00347876	-0.191705	0.348154
ENSG00000250282	AC002401.2	lncRNA	green	0.0605643	0.768834	-0.0596272	0.772318	-0.164947	0.42068	0.584642	0.00170896	-0.0403854	0.844706
ENSG00000108639	SYNGR2	protein_coding	green	0.0596585	0.772201	-0.0210488	0.918709	-0.106249	0.605445	0.62529	0.00063622	-0.254397	0.209792
ENSG00000255422	AP002954.1	lncRNA	green	0.0592492	0.773724	-0.0459571	0.823591	-0.0231963	0.910446	0.503007	0.00881311	-0.204705	0.315796
ENSG00000167766	ZNF83	protein_coding	green	0.0588916	0.775055	0.167688	0.412892	-0.00951713	0.963197	0.616133	0.000804244	-0.0243303	0.906086
ENSG00000184216	IRAK1	protein_coding	green	-0.0517636	0.801713	-0.199949	0.327414	-0.0642433	0.755201	0.452084	0.0204123	0.0395536	0.847868
ENSG00000178947	SMIM10L2A	protein_coding	green	-0.0458764	0.823896	0.118028	0.565804	0.0611369	0.766708	0.426015	0.0300045	-0.301371	0.134613
ENSG00000034053	APBA2	protein_coding	green	0.036173	0.86074	0.232507	0.253039	-0.0947565	0.6452	0.4766	0.0138333	-0.170803	0.404139
ENSG00000103528	SYT17	protein_coding	green	-0.023011	0.911159	-0.0744058	0.717921	0.21144	0.299785	0.431358	0.02779	-0.251562	0.215091
ENSG00000271882	AP001330.5	lncRNA	green	0.01546	0.940248	0.0174646	0.932517	0.00850807	0.967097	0.388357	0.0499273	0.0749821	0.715825
ENSG00000152433	ZNF547	protein_coding	green	0.0121993	0.952835	0.135899	0.508	0.00505652	0.980442	-0.415968	0.0345517	0.159569	0.436192
ENSG00000232387	SKA2P1	processed_pseudogene	green	0.00462108	0.982126	0.0346245	0.866648	0.144078	0.482552	0.319243	0.111905	0.158905	0.438128
ENSG00000234373	SNX18P7	processed_pseudogene	orange	0.721963	3.1337e-05	0.255851	0.20711	0.303488	0.131762	0.133921	0.514252	0.488433	0.0113511
ENSG00000263727	AP001178.1	lncRNA	orange	0.649963	0.000325778	0.286509	0.155894	0.12542	0.54154	0.142421	0.487655	0.658447	0.000255255
ENSG00000078177	N4BP2	protein_coding	orange	0.631878	0.000535067	0.339454	0.0897806	0.234528	0.248818	0.387854	0.0502504	0.638746	0.000444808
ENSG00000173535	TNFRSF10C	protein_coding	orange	0.631263	0.000543877	0.243285	0.231073	0.296931	0.140736	0.23313	0.251733	0.749275	1.05946e-05
ENSG00000256124	LINC01152	lncRNA	orange	0.593757	0.00138487	0.169616	0.407463	0.511869	0.00751586	-0.0265331	0.897626	0.531446	0.00520788
ENSG00000230131	AL160290.2	lncRNA	orange	0.583581	0.00175063	0.372321	0.061056	0.14095	0.492207	0.249827	0.218378	0.650908	0.000317155
ENSG00000122970	IFT81	protein_coding	orange	0.5825	0.00179394	0.2583	0.202644	0.566027	0.0025776	0.171275	0.402824	0.696074	7.84995e-05
ENSG00000257642	KCCAT198	lncRNA	orange	0.555362	0.00322767	0.575557	0.00209486	0.194129	0.341977	0.389951	0.0489149	0.398254	0.0438973
ENSG00000131080	EDA2R	protein_coding	orange	0.549363	0.00365119	0.158891	0.43817	0.109933	0.592923	0.156096	0.446371	0.796596	1.12365e-06
ENSG00000164746	C7orf57	protein_coding	orange	0.548686	0.00370179	-0.0551535	0.789006	0.372729	0.0607511	0.172148	0.400394	0.748141	1.11124e-05
ENSG00000180626	ZNF594	protein_coding	orange	0.54307	0.00414535	0.449446	0.0212515	0.299269	0.137487	-0.0594646	0.772922	0.556023	0.00318365
ENSG00000258667	HIF1A-AS2	lncRNA	orange	0.539319	0.00446602	0.493834	0.0103477	0.179822	0.379393	0.143116	0.485512	0.675376	0.000153294
ENSG00000175170	FAM182B	protein_coding	orange	0.522529	0.00617138	0.269108	0.183722	0.0995057	0.628647	0.281681	0.163296	0.642675	0.000399395
ENSG00000134824	FADS2	protein_coding	orange	0.497115	0.00977514	0.231955	0.254198	0.441617	0.0239077	0.165467	0.419196	0.687841	0.0001031
ENSG00000250740	AC109361.2	lncRNA	orange	0.497034	0.00978887	0.143159	0.485378	0.0862425	0.675284	-0.04661	0.821124	0.684529	0.000114772
ENSG00000154537	FAM27C	lncRNA	orange	0.490282	0.0109987	0.001172	0.995466	0.230538	0.257193	-0.135538	0.509139	0.64818	0.000342592
ENSG00000233818	AP000695.2	lncRNA	orange	0.486636	0.0117021	0.235095	0.247645	0.141991	0.488984	0.412322	0.0363324	0.591191	0.00147023
ENSG00000157856	DRC1	protein_coding	orange	0.472508	0.0147895	-0.0589468	0.77485	0.434865	0.0264094	-0.0257991	0.900444	0.838047	9.1654e-08
ENSG00000274911	AL627230.2	unprocessed_pseudogene	orange	0.472033	0.0149038	0.0374263	0.855963	0.383733	0.0529585	-0.219681	0.280895	0.570732	0.00232856
ENSG00000197283	SYNGAP1	protein_coding	orange	0.45669	0.0190125	0.242576	0.232478	0.351132	0.0785991	0.0874078	0.671137	0.603475	0.00109909
ENSG00000171451	DSEL	protein_coding	orange	0.455725	0.0192991	-0.00106923	0.995864	0.164115	0.42306	-0.0574416	0.780459	0.773698	3.55596e-06
ENSG00000171435	KSR2	protein_coding	orange	0.44808	0.0216968	0.0135408	0.947655	0.332119	0.0973921	0.101175	0.622869	0.905615	2.02318e-10
ENSG00000123892	RAB38	protein_coding	orange	0.448055	0.0217048	-0.0773619	0.70719	0.425581	0.0301904	0.246809	0.224175	0.690871	9.33543e-05
ENSG00000237423	LINC01522	lncRNA	orange	0.445235	0.0226484	0.0128957	0.950146	0.100402	0.625544	0.125874	0.540067	0.966972	9.39491e-16
ENSG00000144596	GRIP2	protein_coding	orange	0.438814	0.0249219	0.084864	0.680203	0.014985	0.942081	0.18363	0.369211	0.771231	3.99427e-06
ENSG00000119771	KLHL29	protein_coding	orange	0.430917	0.0279674	-0.0265104	0.897713	0.434063	0.0267201	0.0807135	0.695088	0.647802	0.000346253
ENSG00000139625	MAP3K12	protein_coding	orange	0.425344	0.0302922	0.06387	0.756581	0.397705	0.044216	0.0725542	0.724669	0.739717	1.57185e-05
ENSG00000109814	UGDH	protein_coding	orange	0.418289	0.0334552	-0.0216564	0.91637	0.0708493	0.730901	0.442982	0.0234261	0.638497	0.000447826
ENSG00000150782	IL18	protein_coding	orange	0.416282	0.0344019	-0.0683717	0.739986	0.375572	0.0586581	-0.120225	0.558541	0.426609	0.0297517
ENSG00000255741	AP000808.2	lncRNA	orange	0.414183	0.0354144	-0.0225085	0.913091	0.131209	0.522885	-0.0167117	0.93542	0.945739	3.25431e-13
ENSG00000248705	AC114812.4	unprocessed_pseudogene	orange	0.406731	0.0392032	-0.0474034	0.818129	0.0989962	0.630415	0.302545	0.133026	0.8482	4.45395e-08
ENSG00000197165	SULT1A2	protein_coding	orange	0.404417	0.0404432	0.277286	0.170244	0.107491	0.601212	0.0815518	0.692073	0.737193	1.73955e-05
ENSG00000272389	AC008536.2	lncRNA	orange	0.401768	0.0419002	0.271761	0.179272	0.133698	0.514961	0.0381778	0.853102	0.58635	0.00164372
ENSG00000076067	RBMS2	protein_coding	orange	0.399619	0.0431128	-0.0446549	0.828516	0.410498	0.0372499	-0.0305371	0.882275	0.653467	0.000294818
ENSG00000198729	PPP1R14C	protein_coding	orange	0.392135	0.0475537	0.0253941	0.901999	0.322426	0.108177	0.287889	0.153823	0.619987	0.000729347
ENSG00000258813	AL442663.3	lncRNA	orange	0.391839	0.0477363	0.432838	0.0272005	-0.0269864	0.895886	0.151129	0.461148	0.580366	0.0018822
ENSG00000183072	NKX2-5	protein_coding	orange	0.391732	0.0478026	0.187078	0.36013	0.0939664	0.64797	0.00986267	0.961862	0.711523	4.59173e-05
ENSG00000156096	UGT2B4	protein_coding	orange	0.391311	0.0480633	-0.0369402	0.857815	0.0527975	0.797832	0.0206486	0.920249	0.955608	3.07933e-14
ENSG00000165061	ZMAT4	protein_coding	orange	0.391014	0.0482487	0.000822407	0.996819	0.219858	0.2805	-0.0490767	0.81182	0.907313	1.64189e-10
ENSG00000170703	TTLL6	protein_coding	orange	0.38769	0.050356	0.009907	0.96169	0.019764	0.923656	0.0271142	0.895396	0.938599	1.38207e-12
ENSG00000228203	RNF144A-AS1	lncRNA	orange	0.382901	0.0535193	-0.131629	0.521545	0.182633	0.371861	0.0646583	0.753667	0.734049	1.97055e-05
ENSG00000110318	CEP126	protein_coding	orange	0.380817	0.0549429	-0.107621	0.600767	0.15025	0.463788	-0.0718114	0.727382	0.865339	1.16061e-08
ENSG00000232450	AL133517.1	transcribed_processed_pseudogene	orange	0.379698	0.0557201	0.102208	0.619306	0.397981	0.0440554	0.235094	0.247646	0.690055	9.58952e-05
ENSG00000228127	LINC01649	lncRNA	orange	0.377522	0.0572545	-0.0172047	0.933519	0.142584	0.487151	0.120988	0.556029	0.834028	1.20328e-07
ENSG00000278318	ZNF229	protein_coding	orange	0.376956	0.0576594	-0.0415847	0.840152	0.245526	0.22667	-0.211252	0.300225	0.560066	0.00292552
ENSG00000187627	RGPD1	protein_coding	orange	0.373055	0.0605085	-0.104303	0.612104	0.347807	0.0816694	-0.0854941	0.677953	0.788121	1.74924e-06
ENSG00000251432	AC108062.1	lncRNA	orange	0.372613	0.0608377	0.0576058	0.779847	0.297678	0.139693	-0.184155	0.36782	0.776091	3.17243e-06
ENSG00000182256	GABRG3	protein_coding	orange	0.36966	0.0630758	-0.07773	0.705857	0.215012	0.291502	0.0336427	0.870397	0.845201	5.54168e-08
ENSG00000007306	CEACAM7	protein_coding	orange	0.368107	0.0642776	0.220249	0.279624	-0.00405162	0.984328	0.00789003	0.969486	0.741455	1.46487e-05
ENSG00000181126	HLA-V	transcribed_unprocessed_pseudogene	orange	0.367826	0.064497	0.102491	0.618333	0.0256547	0.900998	0.102812	0.617227	0.760803	6.4295e-06
ENSG00000144452	ABCA12	protein_coding	orange	0.364571	0.0670807	0.288393	0.153072	0.211315	0.300078	0.106198	0.605619	0.656032	0.000273819
ENSG00000162040	HS3ST6	protein_coding	orange	0.356119	0.0741613	-0.013217	0.948905	0.0661562	0.74814	-0.0178758	0.930932	0.948379	1.81326e-13
ENSG00000176204	LRRTM4	protein_coding	orange	0.351766	0.078024	0.0110827	0.957148	0.0770401	0.708355	-0.0417499	0.839525	0.893024	8.50391e-10
ENSG00000264696	NA	NA	orange	0.350917	0.0787957	-0.0442664	0.829986	0.0577101	0.779457	0.0131947	0.948991	0.898434	4.69482e-10
ENSG00000270067	AC008536.1	lncRNA	orange	0.347877	0.0816039	0.160378	0.43384	0.221612	0.276583	0.115144	0.575401	0.787372	1.81725e-06
ENSG00000254233	LINC02365	lncRNA	orange	0.347362	0.0820863	-0.0466739	0.820883	0.0606657	0.768457	-0.0227688	0.91209	0.899295	4.25863e-10
ENSG00000165323	FAT3	protein_coding	orange	0.345841	0.0835267	-0.081341	0.69283	0.0273969	0.894311	0.0442147	0.830182	0.862771	1.43584e-08
ENSG00000132749	TESMIN	protein_coding	orange	0.343553	0.0857281	0.050252	0.807395	0.0611757	0.766564	0.0408199	0.843055	0.853027	3.10255e-08
ENSG00000183780	SLC35F3	protein_coding	orange	0.340057	0.0891763	0.165411	0.419358	0.312589	0.120002	0.456654	0.019023	0.47185	0.0149482
ENSG00000111785	RIC8B	protein_coding	orange	0.339979	0.0892536	0.06491	0.752738	0.292567	0.146949	0.0933152	0.650256	0.686493	0.000107718
ENSG00000188730	VWC2	protein_coding	orange	0.336516	0.0927735	-0.034874	0.865696	0.0203573	0.921371	0.00613239	0.976281	0.902994	2.77179e-10
ENSG00000279812	AC120057.5	TEC	orange	0.33342	0.0960081	0.127513	0.534761	-0.0104072	0.959758	-0.0729675	0.723161	0.743992	1.32037e-05
ENSG00000179148	ALOXE3	protein_coding	orange	0.331667	0.0978768	-0.0397889	0.846973	-0.0103551	0.959959	0.487394	0.0115528	0.498	0.00962532
ENSG00000238042	LINC02257	lncRNA	orange	0.329613	0.1001	-0.0634588	0.758102	0.060173	0.770288	-0.0141515	0.945298	0.934695	2.83756e-12
ENSG00000185737	NRG3	protein_coding	orange	0.328048	0.101819	-0.0939492	0.64803	0.439876	0.0245338	-0.0144543	0.944129	0.702126	6.38771e-05
ENSG00000229140	CCDC26	lncRNA	orange	0.327623	0.10229	-0.0146489	0.943378	0.145724	0.477513	0.475053	0.0141886	0.480841	0.0128965
ENSG00000114270	COL7A1	protein_coding	orange	0.32756	0.10236	-0.034761	0.866127	0.156063	0.446471	-0.0418879	0.839001	0.869822	7.91972e-09
ENSG00000214999	AC129492.1	lncRNA	orange	0.324184	0.106159	0.0529296	0.797337	-0.0627525	0.760717	0.0770037	0.708487	0.718048	3.62347e-05
ENSG00000279522	AC008536.3	TEC	orange	0.320649	0.110247	0.133304	0.516212	0.131037	0.523435	0.122031	0.552604	0.663298	0.000221271
ENSG00000112280	COL9A1	protein_coding	orange	0.317554	0.113921	0.0741491	0.718855	0.211678	0.299227	0.120191	0.558653	0.766665	4.9346e-06
ENSG00000203727	SAMD5	protein_coding	orange	0.317548	0.113928	-0.0400214	0.846089	-0.0468793	0.820107	0.157572	0.44203	0.688819	9.98632e-05
ENSG00000114268	PFKFB4	protein_coding	orange	0.315761	0.116091	0.319034	0.112153	0.0490794	0.81181	0.0730508	0.722858	0.541533	0.00427425
ENSG00000250420	AACSP1	transcribed_unprocessed_pseudogene	orange	0.31374	0.118572	-0.0401508	0.845597	0.0251327	0.903003	0.201544	0.323487	0.858039	2.1023e-08
ENSG00000163393	SLC22A15	protein_coding	orange	0.309838	0.123472	-0.0139701	0.945998	0.399878	0.0429653	0.0175721	0.932102	0.581019	0.00185483
ENSG00000273077	AC110609.1	lncRNA	orange	0.304489	0.130429	0.144112	0.482447	0.235407	0.246999	-0.0539357	0.793565	0.656432	0.000270663
ENSG00000254944	ATP5F1P5	processed_pseudogene	orange	0.301871	0.133936	0.0262566	0.898687	0.304975	0.129785	0.275777	0.172677	0.657636	0.000261365
ENSG00000185988	PLK5	protein_coding	orange	0.300736	0.135477	0.126658	0.537525	0.107271	0.601961	0.00132761	0.994864	0.854129	2.85157e-08
ENSG00000103647	CORO2B	protein_coding	orange	0.29961	0.137018	-0.0286872	0.889363	0.125469	0.541383	0.328855	0.100931	0.616829	0.000790233
ENSG00000276966	HIST1H4E	protein_coding	orange	0.290499	0.14996	0.411413	0.0367871	0.0290385	0.888016	-0.0842865	0.682267	0.609531	0.000948076
ENSG00000229585	RPL21P44	processed_pseudogene	orange	0.289775	0.151025	0.204021	0.31745	0.350171	0.0794776	-0.196507	0.335979	0.588321	0.00157107
ENSG00000139354	GAS2L3	protein_coding	orange	0.288312	0.153192	0.103242	0.615747	0.046056	0.823217	-0.165604	0.418805	0.49669	0.00984776
ENSG00000229558	SACS-AS1	lncRNA	orange	0.281243	0.163978	-0.0739119	0.719719	0.117654	0.567044	0.0446905	0.828381	0.647801	0.000346266
ENSG00000167080	B4GALNT2	protein_coding	orange	0.280982	0.164387	-0.0558365	0.786452	0.10887	0.596522	0.011284	0.95637	0.88353	2.24256e-09
ENSG00000183018	SPNS2	protein_coding	orange	0.279601	0.166559	0.0443311	0.829741	-0.156692	0.444615	0.0471174	0.819208	0.731962	2.13866e-05
ENSG00000059691	GATB	protein_coding	orange	0.279281	0.167064	-0.170551	0.404844	-0.0342821	0.867955	0.00572188	0.977869	0.541158	0.00430624
ENSG00000112852	PCDHB2	protein_coding	orange	0.273662	0.176128	-0.0664749	0.746965	-0.0207118	0.920006	-0.130116	0.526382	0.427145	0.0295249
ENSG00000186765	FSCN2	protein_coding	orange	0.269049	0.183821	0.137984	0.501452	0.0503979	0.806846	0.141893	0.489287	0.665075	0.000209855
ENSG00000259498	TPM1-AS	lncRNA	orange	0.265249	0.190332	-0.15251	0.457015	0.12242	0.551329	-0.13517	0.5103	0.750842	9.91461e-06
ENSG00000145040	UCN2	protein_coding	orange	0.264524	0.191591	-0.063848	0.756662	0.0593136	0.773484	-0.0209038	0.919267	0.837458	9.54297e-08
ENSG00000239351	NPM1P29	processed_pseudogene	orange	0.259433	0.2006	0.049913	0.808671	0.130232	0.526011	0.218203	0.284228	0.652044	0.000307064
ENSG00000150551	LYPD1	protein_coding	orange	0.255987	0.206861	-0.179682	0.379768	-0.0363868	0.859925	0.0964889	0.639142	0.725948	2.69636e-05
ENSG00000261089	CDC37P2	processed_pseudogene	orange	0.250646	0.216821	0.26851	0.184735	0.0555165	0.787649	0.0623268	0.762294	0.580502	0.00187644
ENSG00000161714	PLCD3	protein_coding	orange	0.246435	0.2249	-0.0555522	0.787515	-0.00365901	0.985846	-0.0110738	0.957182	0.586628	0.00163328
ENSG00000231672	DIRC3	protein_coding	orange	0.244202	0.229263	-0.167064	0.414659	-0.0136819	0.94711	0.17506	0.392347	0.666169	0.000203085
ENSG00000272862	AC106052.1	lncRNA	orange	0.242829	0.231976	0.00934063	0.963879	-0.0133412	0.948426	0.0207464	0.919873	0.662644	0.000225605
ENSG00000099194	SCD	protein_coding	orange	0.234166	0.249571	0.109068	0.595852	-0.0875898	0.67049	0.00473386	0.981689	0.613724	0.000854348
ENSG00000240216	CPHL1P	transcribed_unitary_pseudogene	orange	0.229839	0.25868	-0.0970213	0.637285	0.0957231	0.641817	-0.0627944	0.760562	0.78551	1.99679e-06
ENSG00000134762	DSC3	protein_coding	orange	0.228163	0.262263	-0.0604388	0.7693	0.0723172	0.725535	-0.0633477	0.758513	0.80381	7.58292e-07
ENSG00000250410	AC112722.1	lncRNA	orange	0.221726	0.276329	-0.0768293	0.709119	0.0955884	0.642288	-0.171943	0.400963	0.586992	0.00161973
ENSG00000267701	NA	NA	orange	0.22146	0.27692	-0.0912489	0.657532	-0.0547175	0.790638	-0.0340096	0.868996	0.691223	9.22766e-05
ENSG00000240498	CDKN2B-AS1	lncRNA	orange	0.219866	0.280481	-0.0976356	0.635145	0.0228526	0.911768	0.111628	0.587197	0.70413	5.95973e-05
ENSG00000196337	CGB7	protein_coding	orange	0.219384	0.281564	-0.146352	0.475596	0.0849095	0.68004	-0.0232759	0.91014	0.759678	6.75868e-06
ENSG00000206053	JPT2	protein_coding	orange	0.218737	0.283021	0.0769925	0.708528	0.12529	0.541962	0.126217	0.538953	0.499279	0.00941218
ENSG00000070729	CNGB1	protein_coding	orange	0.21449	0.292704	-0.0267298	0.896871	0.081486	0.692309	0.0642963	0.755005	0.696439	7.75395e-05
ENSG00000259534	AC087477.4	lncRNA	orange	0.212803	0.296608	-0.0109795	0.957546	0.0548381	0.790187	0.0133355	0.948447	0.813442	4.37125e-07
ENSG00000242295	AC087477.1	processed_pseudogene	orange	0.208796	0.306008	0.0037644	0.985439	0.0568286	0.782746	0.017026	0.934208	0.798297	1.02556e-06
ENSG00000257918	AC079385.3	lncRNA	orange	0.204598	0.316054	-0.0697627	0.734881	-0.0141686	0.945232	0.0678604	0.741866	0.696908	7.63223e-05
ENSG00000245248	USP2-AS1	lncRNA	orange	0.201505	0.323584	-0.127039	0.536291	0.0576121	0.779823	-0.0812513	0.693153	0.499529	0.00937094
ENSG00000258774	NANOGP7	transcribed_processed_pseudogene	orange	0.195483	0.338555	-0.12428	0.545249	0.0609675	0.767337	-0.0402368	0.84527	0.765485	5.20778e-06
ENSG00000076351	SLC46A1	protein_coding	orange	0.195251	0.33914	-0.0102581	0.960334	0.114548	0.577392	-0.189009	0.355104	0.512837	0.00738444
ENSG00000129654	FOXJ1	protein_coding	orange	0.191331	0.349113	-0.103788	0.613872	0.163932	0.423584	-0.039675	0.847406	0.639165	0.000439756
ENSG00000227484	CR559946.1	lncRNA	orange	0.178279	0.383563	-0.0934265	0.649865	-0.0157367	0.939181	-0.162346	0.428144	0.578832	0.0019479
ENSG00000280134	AL731532.2	TEC	orange	0.170929	0.403789	-0.0996284	0.628222	-0.0498981	0.808727	-0.0975907	0.635301	0.799374	9.67528e-07
ENSG00000092607	TBX15	protein_coding	orange	0.168832	0.409666	-0.201992	0.32239	-0.105303	0.608679	0.194233	0.341712	0.516977	0.00684389
ENSG00000263325	AC003965.2	lncRNA	orange	0.160549	0.433342	-0.0429895	0.834823	0.258871	0.201612	-0.0764293	0.710569	0.653887	0.000291288
ENSG00000087494	PTHLH	protein_coding	orange	0.158599	0.439023	-0.0764181	0.71061	0.337777	0.0914804	-0.096043	0.640699	0.610294	0.000930384
ENSG00000130813	C19orf66	protein_coding	orange	0.156805	0.444283	-0.195934	0.33742	-0.152233	0.45784	-0.00974883	0.962301	0.722208	3.10507e-05
ENSG00000109452	INPP4B	protein_coding	orange	0.154818	0.450151	-0.177007	0.387022	0.0871305	0.672123	-0.110343	0.591536	0.710765	4.71778e-05
ENSG00000235899	LINC01564	lncRNA	orange	0.154659	0.45062	-0.179523	0.380199	-0.174333	0.394348	-0.0115624	0.955295	0.66609	0.000203567
ENSG00000274026	FAM27E3	transcribed_processed_pseudogene	orange	0.144212	0.482141	-0.164095	0.423118	-0.0410508	0.842178	-0.182182	0.373064	0.611751	0.00089741
ENSG00000109944	JHY	protein_coding	orange	0.123904	0.546478	-0.0418402	0.839182	0.267996	0.18561	0.0103334	0.960043	0.442439	0.0236169
ENSG00000118785	SPP1	protein_coding	orange	0.123679	0.547212	-0.103906	0.613465	0.273598	0.176233	-0.0258126	0.900392	0.646268	0.000361463
ENSG00000149582	TMEM25	protein_coding	orange	0.11608	0.572278	0.216484	0.288132	0.00731735	0.9717	-0.128843	0.530471	0.461528	0.0176277
ENSG00000269959	SPACA6P-AS	lncRNA	orange	0.106216	0.605557	0.20396	0.3176	0.0832485	0.685983	0.0519565	0.800989	0.49092	0.0108794
ENSG00000176092	CRYBG2	protein_coding	orange	0.105246	0.608872	-0.171845	0.401236	-0.0436725	0.832235	-0.139879	0.495535	0.816814	3.57779e-07
ENSG00000135925	WNT10A	protein_coding	orange	0.0936764	0.648988	-0.0878994	0.66939	0.142605	0.487088	-0.068066	0.74111	0.704452	5.89343e-05
ENSG00000249635	AC109361.1	lncRNA	orange	0.0883902	0.667647	-0.201546	0.323484	0.0135291	0.9477	-0.0119891	0.953647	0.55991	0.00293515
ENSG00000126562	WNK4	protein_coding	orange	0.0772683	0.707529	-0.0901071	0.661565	-0.0738413	0.719976	-0.0409669	0.842497	0.604814	0.00106402
ENSG00000257042	AC008011.2	lncRNA	orange	0.0719845	0.72675	-0.160674	0.432979	0.0467683	0.820526	-0.127757	0.53397	0.629483	0.000570096
ENSG00000132639	SNAP25	protein_coding	orange	0.0718988	0.727063	-0.077408	0.707023	0.347862	0.0816175	-0.132828	0.517725	0.600034	0.00119383
ENSG00000176289	IDSP1	unprocessed_pseudogene	orange	0.0232671	0.910174	-0.144191	0.482206	-0.0896161	0.663302	-0.0980134	0.63383	0.661816	0.000231207
ENSG00000273259	AL049839.2	protein_coding	royalblue	0.528153	0.0055477	0.359868	0.070953	0.90476	2.2443e-10	0.177242	0.386382	0.212335	0.297695
ENSG00000253250	C8orf88	protein_coding	royalblue	0.348013	0.081476	0.0279153	0.892322	0.869088	8.43916e-09	0.0701411	0.733494	0.00580392	0.977551
ENSG00000172817	CYP7B1	protein_coding	royalblue	0.520371	0.00642585	0.294229	0.14456	0.866545	1.04857e-08	0.280636	0.164929	0.105584	0.607716
ENSG00000232480	TGFB2-AS1	lncRNA	royalblue	0.270919	0.180675	0.0149594	0.94218	0.861246	1.62608e-08	-0.0707046	0.731431	0.0884111	0.667573
ENSG00000118997	DNAH7	protein_coding	royalblue	0.525571	0.00582704	0.297788	0.139539	0.860521	1.72414e-08	0.271254	0.180116	0.275053	0.173854
ENSG00000165309	ARMC3	protein_coding	royalblue	0.479156	0.0132622	0.00653511	0.974724	0.859177	1.92048e-08	-0.016904	0.934678	0.213685	0.294562
ENSG00000094755	GABRP	protein_coding	royalblue	0.283162	0.160999	-0.0292757	0.887107	0.848487	4.36083e-08	-0.0136591	0.947198	0.00271369	0.989503
ENSG00000133640	LRRIQ1	protein_coding	royalblue	0.62858	0.000583804	0.175698	0.390599	0.84841	4.38577e-08	0.214123	0.293551	0.257153	0.204728
ENSG00000255750	AC022509.1	lncRNA	royalblue	0.356781	0.0735871	0.0635376	0.75781	0.845691	5.34881e-08	0.236666	0.244407	-0.0623561	0.762186
ENSG00000228940	AL391730.1	unprocessed_pseudogene	royalblue	0.381051	0.0547818	0.0523425	0.79954	0.845225	5.53186e-08	-0.0179688	0.930573	0.0123732	0.952163
ENSG00000253525	AC104966.1	processed_pseudogene	royalblue	0.268591	0.184598	-0.0384867	0.851926	0.84429	5.91633e-08	0.00726333	0.971909	0.106517	0.604529
ENSG00000259518	LINC01583	lncRNA	royalblue	0.490742	0.0109126	0.234513	0.24885	0.840861	7.54173e-08	0.333483	0.0959415	0.00810342	0.968661
ENSG00000204764	RANBP17	protein_coding	royalblue	0.226332	0.266216	-0.0146569	0.943347	0.833542	1.243e-07	0.049788	0.809141	-0.0318869	0.87711
ENSG00000253213	AC010306.1	processed_pseudogene	royalblue	0.272047	0.178796	0.0957716	0.641648	0.831663	1.40768e-07	-0.0510667	0.804332	-0.0102111	0.960515
ENSG00000214650	AC073592.1	lncRNA	royalblue	0.586589	0.00163476	0.420998	0.0322108	0.825063	2.15381e-07	-0.000938579	0.996369	0.0430691	0.834522
ENSG00000214914	RPL23AP3	processed_pseudogene	royalblue	0.346981	0.0824456	0.0353624	0.863831	0.824726	2.20005e-07	0.195245	0.339154	0.104514	0.61138
ENSG00000080709	KCNN2	protein_coding	royalblue	0.274224	0.175207	-0.0239881	0.907402	0.820558	2.85082e-07	-0.0164912	0.93627	-0.00368647	0.98574
ENSG00000151229	SLC2A13	protein_coding	royalblue	0.472504	0.0147905	0.251186	0.215801	0.817982	3.33484e-07	8.05593e-05	0.999688	0.0892693	0.66453
ENSG00000262884	AC015921.1	lncRNA	royalblue	0.233177	0.251635	0.0926598	0.652561	0.817817	3.36842e-07	-0.14444	0.48144	-0.0464725	0.821643
ENSG00000177994	C2orf73	protein_coding	royalblue	0.444428	0.0229247	0.12758	0.534544	0.812816	4.53494e-07	0.253814	0.210875	0.151997	0.458546
ENSG00000142609	CFAP74	protein_coding	royalblue	0.33837	0.0908764	0.0235582	0.909054	0.812712	4.56273e-07	-0.0673495	0.743745	0.00293718	0.988638
ENSG00000251320	AC011352.3	lncRNA	royalblue	0.185979	0.363011	-0.00611234	0.976359	0.811158	4.99517e-07	-0.0134912	0.947846	0.0161048	0.93776
ENSG00000196136	SERPINA3	protein_coding	royalblue	0.370732	0.0622562	0.256749	0.205464	0.811074	5.01952e-07	0.232572	0.252903	0.0695057	0.735824
ENSG00000100583	SAMD15	protein_coding	royalblue	0.699966	6.87933e-05	0.498919	0.00947177	0.807966	6.00105e-07	0.106193	0.605635	0.333327	0.0961063
ENSG00000272975	MYHAS	lncRNA	royalblue	0.730222	2.28838e-05	0.471841	0.0149503	0.804733	7.20234e-07	0.329046	0.10072	0.0753299	0.71456
ENSG00000147724	FAM135B	protein_coding	royalblue	0.371319	0.0618107	0.373795	0.0599595	0.802921	7.96613e-07	0.218138	0.284374	-0.0653316	0.751181
ENSG00000176907	TCIM	protein_coding	royalblue	0.141486	0.490547	-0.0589024	0.775015	0.800792	8.95583e-07	-0.150185	0.463983	0.017914	0.930784
ENSG00000246130	AC107959.2	lncRNA	royalblue	0.42995	0.0283602	0.243256	0.23113	0.794771	1.23808e-06	0.17544	0.391305	-0.061237	0.766336
ENSG00000196498	NCOR2	protein_coding	royalblue	0.64033	0.000425984	0.261103	0.197615	0.793817	1.30204e-06	0.483312	0.0123755	0.200005	0.327273
ENSG00000139263	LRIG3	protein_coding	royalblue	0.677592	0.000143054	0.609525	0.000948225	0.783636	2.19342e-06	0.172177	0.400312	-0.0342535	0.868064
ENSG00000249699	LINC02261	lncRNA	royalblue	0.562052	0.00280539	0.0686866	0.73883	0.782558	2.3142e-06	0.579459	0.00192083	-0.000652816	0.997475
ENSG00000276545	PCDHGB9P	unprocessed_pseudogene	royalblue	0.600974	0.00116727	0.399866	0.0429721	0.782234	2.35172e-06	0.0776706	0.706072	0.339121	0.090116
ENSG00000245281	AC124242.1	lncRNA	royalblue	0.452486	0.0202869	0.182082	0.37333	0.779416	2.70106e-06	-0.0470377	0.819509	0.239743	0.238147
ENSG00000092969	TGFB2	protein_coding	royalblue	0.188684	0.355947	-0.0322044	0.875895	0.775464	3.26921e-06	-0.139674	0.496176	0.195715	0.33797
ENSG00000230445	LRRC37A6P	transcribed_processed_pseudogene	royalblue	0.509503	0.00784551	0.236381	0.244992	0.765792	5.13547e-06	0.261737	0.196489	0.111624	0.587211
ENSG00000204904	LINC01545	lncRNA	royalblue	0.449595	0.0212031	0.0191881	0.925874	0.765043	5.31348e-06	0.128332	0.532118	0.101554	0.621561
ENSG00000104723	TUSC3	protein_coding	royalblue	0.405989	0.0395978	0.40662	0.0392622	0.76378	5.62638e-06	0.0791552	0.700706	-0.0537665	0.794199
ENSG00000107186	MPDZ	protein_coding	royalblue	0.368448	0.064012	0.102071	0.619779	0.761399	6.26096e-06	-0.0400479	0.845988	0.108452	0.597941
ENSG00000165511	C10orf25	lncRNA	royalblue	0.300871	0.135292	-0.0193389	0.925293	0.761367	6.26998e-06	0.310538	0.122582	0.0391795	0.84929
ENSG00000136918	WDR38	protein_coding	royalblue	0.360443	0.0704709	-0.0441347	0.830485	0.760411	6.54275e-06	-0.0715599	0.728302	0.177191	0.386521
ENSG00000152580	IGSF10	protein_coding	royalblue	0.488827	0.0112752	-0.04426	0.83001	0.758597	7.08939e-06	-0.00567628	0.978045	0.282502	0.162019
ENSG00000228157	AC007952.2	lncRNA	royalblue	0.509695	0.00781824	0.482033	0.0126429	0.758127	7.23746e-06	-0.043201	0.834022	0.104757	0.610548
ENSG00000109738	GLRB	protein_coding	royalblue	0.29974	0.13684	-0.00711543	0.97248	0.741946	1.43588e-05	-0.0240155	0.907296	0.378131	0.0568218
ENSG00000142949	PTPRF	protein_coding	royalblue	0.212062	0.298332	-0.0308527	0.881067	0.739819	1.56536e-05	0.0915477	0.656478	0.066558	0.746659
ENSG00000154127	UBASH3B	protein_coding	royalblue	0.598518	0.00123774	0.323298	0.107173	0.739332	1.59645e-05	0.14648	0.475204	0.400087	0.0428465
ENSG00000120322	PCDHB8	protein_coding	royalblue	0.514649	0.00714362	0.371537	0.0616458	0.731818	2.1507e-05	0.273008	0.177206	0.0925541	0.652932
ENSG00000140839	CLEC18B	protein_coding	royalblue	0.303287	0.132031	-0.0321417	0.876135	0.729721	2.33317e-05	-0.0285063	0.890056	0.0882509	0.668142
ENSG00000131044	TTLL9	protein_coding	royalblue	0.375576	0.0586549	-0.00735831	0.971541	0.727501	2.54123e-05	0.0522705	0.79981	0.461811	0.0175492
ENSG00000102452	NALCN	protein_coding	royalblue	0.290458	0.150021	0.193335	0.343992	0.727361	2.55488e-05	0.22496	0.269204	0.111621	0.58722
ENSG00000249550	LINC01234	lncRNA	royalblue	0.265611	0.189705	-0.0663444	0.747446	0.724789	2.81764e-05	-0.0204486	0.921019	-0.041502	0.840466
ENSG00000169302	STK32A	protein_coding	royalblue	0.260144	0.199326	-0.0303383	0.883037	0.720145	3.35331e-05	-0.108515	0.597729	-0.00590087	0.977176
ENSG00000178776	C5orf46	protein_coding	royalblue	0.0754704	0.71405	-0.0202858	0.921646	0.717918	3.64081e-05	-0.0306907	0.881687	-0.0130415	0.949582
ENSG00000173334	TRIB1	protein_coding	royalblue	0.23376	0.250417	-0.010693	0.958653	0.714567	4.11475e-05	-0.182534	0.372125	-0.0415574	0.840255
ENSG00000141519	CCDC40	protein_coding	royalblue	0.388344	0.0499359	-0.0100332	0.961203	0.713903	4.21488e-05	0.122455	0.551215	0.344111	0.0851871
ENSG00000129151	BBOX1	protein_coding	royalblue	0.487228	0.0115854	0.243953	0.229753	0.713757	4.23716e-05	0.0194634	0.924814	0.169719	0.407174
ENSG00000248362	AC011352.1	lncRNA	royalblue	0.134114	0.513642	-0.0390809	0.849665	0.709859	4.87256e-05	-0.0157657	0.939069	0.00864728	0.966559
ENSG00000124225	PMEPA1	protein_coding	royalblue	0.433482	0.026947	0.333275	0.0961616	0.706741	5.44031e-05	0.0105267	0.959296	0.295938	0.142134
ENSG00000256564	AC007552.2	lncRNA	royalblue	0.694881	8.17081e-05	0.508326	0.0080139	0.70351	6.08941e-05	0.294674	0.143926	0.356598	0.0737452
ENSG00000187987	ZSCAN23	protein_coding	royalblue	0.679983	0.000132683	0.256394	0.206113	0.698036	7.3466e-05	0.114637	0.577097	0.504678	0.00855521
ENSG00000150093	ITGB1	protein_coding	royalblue	0.307024	0.127098	0.282534	0.161969	0.694501	8.27528e-05	0.061481	0.765431	0.134472	0.512506
ENSG00000248538	AC022784.1	lncRNA	royalblue	0.188311	0.356916	0.120056	0.559098	0.694035	8.40524e-05	-0.000791989	0.996936	0.0145447	0.94378
ENSG00000101384	JAG1	protein_coding	royalblue	0.31023	0.122974	0.216541	0.288001	0.691988	8.99713e-05	-0.0416959	0.839729	0.381283	0.0546221
ENSG00000111328	CDK2AP1	protein_coding	royalblue	0.35105	0.0786744	0.0750822	0.715461	0.691232	9.22488e-05	0.294357	0.144378	0.16944	0.407957
ENSG00000228816	AK3P5	processed_pseudogene	royalblue	0.429145	0.0286908	0.103213	0.615848	0.689802	9.66952e-05	0.464057	0.0169372	0.0810228	0.693975
ENSG00000240602	AADACP1	transcribed_unprocessed_pseudogene	royalblue	0.128292	0.532247	-0.0389732	0.850075	0.688945	9.94499e-05	0.034039	0.868883	-0.0556858	0.787016
ENSG00000280054	AC004241.5	TEC	royalblue	0.431876	0.0275825	0.175013	0.392476	0.688667	0.000100358	-0.138059	0.501217	0.155681	0.447598
ENSG00000159167	STC1	protein_coding	royalblue	0.381843	0.0542383	0.538795	0.00451241	0.685967	0.00010957	-0.0958694	0.641306	0.0309662	0.880633
ENSG00000131437	KIF3A	protein_coding	royalblue	0.251791	0.214659	0.046744	0.820618	0.684235	0.000115864	-0.0895122	0.66367	0.242018	0.233586
ENSG00000173218	VANGL1	protein_coding	royalblue	0.236456	0.244838	0.129915	0.527027	0.681826	0.000125145	0.246618	0.224544	0.0751319	0.71528
ENSG00000132561	MATN2	protein_coding	royalblue	0.440439	0.0243296	-0.136787	0.505207	0.680826	0.000129186	-0.102259	0.619132	0.193442	0.343721
ENSG00000064763	FAR2	protein_coding	royalblue	0.268598	0.184587	0.298564	0.138462	0.674716	0.000156467	0.269066	0.183794	-0.151135	0.461128
ENSG00000272070	AC005618.1	lncRNA	royalblue	0.362645	0.0686463	0.14722	0.472951	0.674517	0.000157435	0.0443237	0.829769	0.410279	0.0373611
ENSG00000123119	NECAB1	protein_coding	royalblue	0.166331	0.416738	-0.0544379	0.791684	0.673763	0.000161154	0.00813592	0.968535	0.00337974	0.986927
ENSG00000135083	CCNJL	protein_coding	royalblue	0.434071	0.0267171	0.137566	0.50276	0.673533	0.000162298	0.26377	0.192909	0.129159	0.529455
ENSG00000142621	FHAD1	protein_coding	royalblue	0.22864	0.261239	-0.143505	0.484314	0.671507	0.000172731	-0.0350112	0.865172	0.10478	0.610467
ENSG00000256870	SLC5A8	protein_coding	royalblue	0.38801	0.05015	-0.0326723	0.874106	0.670806	0.000176473	-0.116984	0.569271	-0.00871721	0.966288
ENSG00000259495	AC016705.2	lncRNA	royalblue	0.611668	0.000899261	0.393637	0.0466346	0.670782	0.000176605	0.583609	0.00174952	0.176296	0.388962
ENSG00000255992	AC131009.1	lncRNA	royalblue	0.413074	0.0359593	0.0448653	0.82772	0.669912	0.000181355	0.191607	0.348407	0.44354	0.0232316
ENSG00000009830	POMT2	protein_coding	royalblue	0.683359	0.000119164	0.472616	0.0147636	0.669777	0.000182101	0.358729	0.0719165	0.364879	0.0668331
ENSG00000279068	AC244517.6	protein_coding	royalblue	0.560064	0.00292563	0.274334	0.175028	0.669625	0.000182941	0.406639	0.0392522	0.159479	0.436455
ENSG00000170425	ADORA2B	protein_coding	royalblue	0.482534	0.0125375	0.16504	0.420414	0.667621	0.000194396	0.327649	0.102261	0.177662	0.385239
ENSG00000224984	AL512363.1	lncRNA	royalblue	0.463155	0.0171808	0.0953221	0.64322	0.667615	0.00019443	0.231402	0.255365	0.0589557	0.774816
ENSG00000256043	CTSO	protein_coding	royalblue	0.282958	0.161313	0.0724169	0.725171	0.666946	0.000198396	-0.1419	0.489267	0.107415	0.601468
ENSG00000145700	ANKRD31	protein_coding	royalblue	0.691836	9.04238e-05	0.407176	0.0389684	0.666005	0.000204085	0.232081	0.253932	0.318637	0.112625
ENSG00000141540	TTYH2	protein_coding	royalblue	0.245741	0.226251	-0.0849811	0.679785	0.665379	0.000207952	0.251254	0.215671	-0.159946	0.435096
ENSG00000240250	RN7SL541P	misc_RNA	royalblue	0.661084	0.000236257	0.548458	0.00371902	0.66198	0.000230089	0.146859	0.474049	0.192332	0.34655
ENSG00000145687	SSBP2	protein_coding	royalblue	0.21286	0.296476	-0.0925735	0.652864	0.65755	0.000262017	-0.0151354	0.941501	-0.0295828	0.88593
ENSG00000185483	ROR1	protein_coding	royalblue	0.447806	0.0217869	0.0930273	0.651268	0.653438	0.000295061	0.319641	0.111434	-0.0627695	0.760654
ENSG00000253837	AC090197.1	lncRNA	royalblue	0.449176	0.0213389	0.103329	0.615446	0.651079	0.000315624	0.418642	0.033291	0.062799	0.760545
ENSG00000160471	COX6B2	protein_coding	royalblue	0.128422	0.531827	-0.0960895	0.640537	0.650909	0.000317151	-0.0595302	0.772678	-0.0527137	0.798147
ENSG00000138735	PDE5A	protein_coding	royalblue	0.386131	0.0513692	-0.010554	0.95919	0.650908	0.000317161	-0.120438	0.557842	0.394232	0.0462744
ENSG00000235947	EGOT	lncRNA	royalblue	0.399207	0.0433484	0.308658	0.124983	0.648734	0.000337288	0.142551	0.487256	0.0400767	0.845879
ENSG00000213376	GAPDHP71	processed_pseudogene	royalblue	0.264803	0.191107	-0.0542105	0.792536	0.646307	0.000361069	0.181246	0.375565	-0.0116035	0.955136
ENSG00000180263	FGD6	protein_coding	royalblue	0.459459	0.0182093	0.397337	0.0444306	0.644943	0.00037507	0.254421	0.209748	0.214007	0.293818
ENSG00000170858	LILRP2	transcribed_processed_pseudogene	royalblue	0.214777	0.292044	-0.0428943	0.835184	0.640903	0.000419346	-0.0788796	0.701701	-0.0865107	0.674329
ENSG00000227141	AL160286.1	processed_pseudogene	royalblue	0.374941	0.0591176	0.195777	0.337814	0.640209	0.0004274	0.240436	0.236752	-0.060209	0.770154
ENSG00000279375	AC244517.7	lncRNA	royalblue	0.365776	0.0661147	0.183294	0.370104	0.639003	0.000441701	0.236075	0.245621	0.196006	0.337238
ENSG00000197249	SERPINA1	protein_coding	royalblue	0.338695	0.0905468	0.031512	0.878544	0.637698	0.00045766	-0.047999	0.815882	0.356901	0.073483
ENSG00000138448	ITGAV	protein_coding	royalblue	0.369805	0.0629638	0.452322	0.0203379	0.634857	0.000494123	0.34622	0.0831654	-0.0586423	0.775984
ENSG00000263680	AC007639.1	lncRNA	royalblue	0.441231	0.0240455	0.152362	0.457456	0.634082	0.000504507	0.565489	0.0026075	0.0230124	0.911153
ENSG00000138119	MYOF	protein_coding	royalblue	0.324884	0.105363	-0.0266908	0.89702	0.628642	0.000582848	0.285674	0.157157	0.090814	0.659067
ENSG00000255778	NA	NA	royalblue	-0.025051	0.903317	-0.0555518	0.787517	0.624558	0.00064843	-0.106818	0.603503	-0.0318942	0.877081
ENSG00000162378	ZYG11B	protein_coding	royalblue	0.122863	0.549879	-0.10598	0.606364	0.619465	0.000739112	0.012157	0.952998	-0.07723	0.707667
ENSG00000235884	LINC00941	lncRNA	royalblue	0.783058	2.25746e-06	0.247996	0.221881	0.619066	0.000746658	0.379449	0.0558937	0.432815	0.0272096
ENSG00000198707	CEP290	protein_coding	royalblue	0.645386	0.000370475	0.306153	0.128236	0.610579	0.000923865	0.623007	0.000674962	0.282544	0.161954
ENSG00000074657	ZNF532	protein_coding	royalblue	0.298596	0.138418	0.430548	0.0281168	0.608775	0.000965883	-0.125427	0.541516	0.231232	0.255723
ENSG00000172819	RARG	protein_coding	royalblue	0.0875969	0.670464	-0.127877	0.533583	0.608492	0.000972622	-0.20452	0.316243	0.12691	0.53671
ENSG00000117020	AKT3	protein_coding	royalblue	0.291875	0.147952	0.301445	0.134512	0.605881	0.00103677	0.236062	0.245647	0.125384	0.541657
ENSG00000205403	CFI	protein_coding	royalblue	0.153098	0.455258	0.0507667	0.805459	0.602971	0.00111253	0.0489499	0.812298	-0.0858014	0.676857
ENSG00000159842	ABR	protein_coding	royalblue	0.585859	0.00166224	0.413292	0.0358517	0.599946	0.00119632	0.271379	0.179908	0.212933	0.296305
ENSG00000196924	FLNA	protein_coding	royalblue	0.285296	0.157731	0.216661	0.287728	0.597627	0.00126421	0.305689	0.128844	0.355219	0.0749481
ENSG00000165972	CCDC38	protein_coding	royalblue	0.373403	0.0602494	-0.03151	0.878552	0.596897	0.00128623	-0.104637	0.610959	0.465359	0.0165905
ENSG00000205562	AL049775.1	lncRNA	royalblue	0.53473	0.00488673	0.390931	0.0482999	0.595281	0.00133623	-0.071902	0.727051	0.19604	0.337152
ENSG00000228412	AL022068.1	lncRNA	royalblue	0.168042	0.411894	-0.129855	0.527219	0.593302	0.00139968	-0.15644	0.445358	-0.0398712	0.84666
ENSG00000259717	LINC00677	lncRNA	royalblue	0.345507	0.0838451	0.515493	0.00703367	0.58766	0.0015951	0.114561	0.57735	0.0527969	0.797835
ENSG00000066557	LRRC40	protein_coding	royalblue	0.0553169	0.788395	-0.101899	0.62037	0.581633	0.00182935	0.220541	0.278971	-0.214001	0.293833
ENSG00000029153	ARNTL2	protein_coding	royalblue	0.00782628	0.969732	-0.0861324	0.675677	0.580632	0.00187102	0.103515	0.61481	0.0853833	0.678349
ENSG00000188001	TPRG1	protein_coding	royalblue	0.0577627	0.779261	-0.18965	0.353445	0.579275	0.00192872	-0.0982651	0.632955	-0.175894	0.39006
ENSG00000230612	AC004039.1	lncRNA	royalblue	0.302195	0.133497	0.12575	0.540468	0.578582	0.00195879	-0.152275	0.457717	0.435923	0.0260042
ENSG00000196670	ZFP62	protein_coding	royalblue	0.476236	0.0139161	0.558523	0.00302185	0.574506	0.00214395	0.0831018	0.686509	0.25287	0.212636
ENSG00000169991	IFFO2	protein_coding	royalblue	0.464138	0.0169155	0.0398977	0.846559	0.572936	0.00221915	-0.150563	0.462847	0.371958	0.0613289
ENSG00000253771	TPTE2P1	transcribed_unprocessed_pseudogene	royalblue	0.364195	0.0673842	0.194403	0.341281	0.567908	0.00247542	-0.150051	0.464388	0.328701	0.101099
ENSG00000235721	AC013268.3	processed_pseudogene	royalblue	0.491293	0.0108101	0.433441	0.0269631	0.563953	0.00269442	0.239852	0.237927	-0.080744	0.694978
ENSG00000168495	POLR3D	protein_coding	royalblue	0.31078	0.122276	0.430276	0.0282272	0.562515	0.002778	0.173882	0.39559	0.114498	0.577561
ENSG00000162490	DRAXIN	protein_coding	royalblue	0.0316766	0.877914	-0.13427	0.513149	0.5596	0.00295432	-0.105983	0.606353	-0.112565	0.584044
ENSG00000108018	SORCS1	protein_coding	royalblue	0.235136	0.247559	0.0655629	0.750328	0.555868	0.00319392	-0.130583	0.524887	-0.117479	0.567626
ENSG00000254340	AC022784.7	lncRNA	royalblue	0.250442	0.217209	0.171966	0.400898	0.553273	0.00337011	0.0786655	0.702474	0.266292	0.18853
ENSG00000010803	SCMH1	protein_coding	royalblue	0.00536179	0.979261	-0.205024	0.315025	0.55229	0.00343901	-0.0868885	0.672984	-0.159736	0.435707
ENSG00000111666	CHPT1	protein_coding	royalblue	0.266452	0.188254	-0.0777663	0.705726	0.551503	0.00349497	0.408095	0.0384869	-0.0980398	0.633739
ENSG00000256797	KLRF2	protein_coding	royalblue	0.208407	0.306931	-0.0793362	0.700053	0.551125	0.00352215	-0.0683661	0.740007	-0.0549948	0.7896
ENSG00000155850	SLC26A2	protein_coding	royalblue	0.22523	0.268613	0.0437317	0.832011	0.549811	0.003618	0.357629	0.0728563	0.0671094	0.744629
ENSG00000135486	HNRNPA1	protein_coding	royalblue	0.230975	0.256267	-0.0690961	0.737327	0.549768	0.0036212	-0.152424	0.457272	0.0581327	0.777882
ENSG00000182263	FIGN	protein_coding	royalblue	0.145605	0.477874	-0.145051	0.479571	0.549094	0.00367121	-0.08873	0.666442	0.329157	0.100599
ENSG00000170525	PFKFB3	protein_coding	royalblue	0.491672	0.0107401	0.345588	0.0837671	0.548671	0.00370294	-0.0240369	0.907214	0.393171	0.0469179
ENSG00000162636	FAM102B	protein_coding	royalblue	0.128082	0.532925	-0.0712477	0.729443	0.54668	0.00385534	-0.119658	0.560412	0.049096	0.811747
ENSG00000173281	PPP1R3B	protein_coding	royalblue	0.391328	0.048053	0.288564	0.152818	0.545772	0.0039266	0.307235	0.126824	0.147137	0.473205
ENSG00000184304	PRKD1	protein_coding	royalblue	0.23043	0.257423	0.0677615	0.742229	0.543216	0.00413327	-0.157192	0.443147	0.206047	0.312564
ENSG00000123977	DAW1	protein_coding	royalblue	0.220842	0.278297	-0.0714213	0.728808	0.54053	0.00436028	-0.118827	0.563159	0.0403198	0.844955
ENSG00000112293	GPLD1	protein_coding	royalblue	0.290138	0.15049	0.133228	0.516452	0.536999	0.00467466	0.245409	0.226897	-0.0922557	0.653983
ENSG00000255176	AP000941.1	lncRNA	royalblue	0.172464	0.399515	0.158385	0.43965	0.529123	0.00544576	0.0974946	0.635636	0.233779	0.250377
ENSG00000204956	PCDHGA1	protein_coding	royalblue	0.461537	0.0176252	0.314919	0.11712	0.527643	0.00560203	0.207766	0.308454	0.472304	0.0148384
ENSG00000134294	SLC38A2	protein_coding	royalblue	0.343452	0.0858261	-0.122253	0.551876	0.527574	0.00560935	-0.0135936	0.947451	0.537387	0.00463925
ENSG00000084636	COL16A1	protein_coding	royalblue	0.0991495	0.629883	0.130895	0.52389	0.527123	0.00565775	-0.158137	0.440375	0.0514788	0.802783
ENSG00000248449	PCDHGB8P	transcribed_unitary_pseudogene	royalblue	0.316331	0.115397	0.155116	0.449266	0.524166	0.00598405	0.310143	0.123084	0.074649	0.717036
ENSG00000237523	LINC00857	lncRNA	royalblue	0.206891	0.310543	0.109486	0.594435	0.523169	0.00609758	-0.162428	0.427908	0.267776	0.185985
ENSG00000139645	ANKRD52	protein_coding	royalblue	0.286111	0.156496	0.15485	0.450055	0.515841	0.00698877	0.223861	0.271612	0.16194	0.429317
ENSG00000273038	AL365203.2	lncRNA	royalblue	0.260855	0.198056	0.0600539	0.770731	0.514601	0.00714994	0.192143	0.347033	0.356938	0.0734509
ENSG00000077514	POLD3	protein_coding	royalblue	0.501246	0.00909197	0.523734	0.00603297	0.512717	0.00740063	-0.0292741	0.887113	0.163274	0.425474
ENSG00000133641	C12orf29	protein_coding	royalblue	0.152251	0.457786	-0.113986	0.579275	0.511865	0.00751652	0.174781	0.393115	-0.104266	0.61223
ENSG00000124251	TP53TG5	protein_coding	royalblue	0.142642	0.486975	0.0861275	0.675694	0.50525	0.00846827	0.0143298	0.944609	0.166867	0.415216
ENSG00000244144	AC128688.1	processed_pseudogene	royalblue	0.329213	0.100537	-0.0708861	0.730766	0.502679	0.00886455	-0.0122924	0.952475	0.544233	0.00404995
ENSG00000231298	LINC00704	lncRNA	royalblue	0.0880682	0.66879	-0.136686	0.505523	0.486557	0.0117178	-0.0616366	0.764853	0.160055	0.43478
ENSG00000221890	NPTXR	protein_coding	royalblue	-0.139136	0.497852	-0.136489	0.506145	0.485767	0.0118751	-0.112814	0.583207	-0.122586	0.550785
ENSG00000196458	ZNF605	protein_coding	royalblue	0.1047	0.610743	0.212373	0.297608	0.485162	0.011997	-0.0101606	0.96071	0.237484	0.242732
ENSG00000270021	AC026691.1	lncRNA	royalblue	0.162348	0.428138	-0.0842737	0.682313	0.475242	0.0141448	0.410519	0.0372392	-0.0212912	0.917775
ENSG00000132763	MMACHC	protein_coding	royalblue	0.231118	0.255966	0.248306	0.221285	0.475142	0.0141678	0.264863	0.191003	-0.123168	0.548882
ENSG00000165671	NSD1	protein_coding	royalblue	0.363844	0.0676685	0.316052	0.115736	0.469545	0.0155153	0.0266581	0.897146	0.170991	0.403614
ENSG00000237413	MGC27382	lncRNA	royalblue	0.0981644	0.633305	-0.0696372	0.735341	0.465481	0.0165585	-0.002019	0.99219	0.119992	0.559311
ENSG00000064042	LIMCH1	protein_coding	royalblue	-0.0463587	0.822073	-0.0630001	0.7598	0.460079	0.0180333	-0.128607	0.53123	-0.0556809	0.787034
ENSG00000234231	AC093616.1	unprocessed_pseudogene	royalblue	0.327209	0.10275	0.355378	0.0748088	0.449379	0.0212729	0.383976	0.0527959	0.181876	0.373879
ENSG00000167291	TBC1D16	protein_coding	royalblue	0.288754	0.152536	0.374806	0.0592163	0.448595	0.0215279	0.0278463	0.892587	0.114257	0.578367
ENSG00000079739	PGM1	protein_coding	royalblue	0.207589	0.308876	-0.161396	0.430889	0.444917	0.022757	0.372401	0.060996	0.0541914	0.792607
ENSG00000038382	TRIO	protein_coding	royalblue	0.324177	0.106167	0.0805038	0.695843	0.442466	0.0236073	0.0776548	0.706129	0.556509	0.00315167
ENSG00000174233	ADCY6	protein_coding	royalblue	0.239531	0.238574	0.2806	0.164986	0.414815	0.0351073	-0.0118842	0.954052	0.269631	0.182839
ENSG00000184867	ARMCX2	protein_coding	royalblue	0.224043	0.271212	0.249118	0.219729	0.408593	0.0382278	0.48702	0.0116263	-0.0497194	0.8094
ENSG00000157168	NRG1	protein_coding	royalblue	0.230016	0.258303	-0.0784113	0.703393	0.407793	0.0386448	0.0441223	0.830532	0.530115	0.0053431
ENSG00000168412	MTNR1A	protein_coding	royalblue	0.244551	0.228578	0.0424644	0.836814	0.405206	0.0400172	0.103965	0.613265	0.564049	0.0026889
ENSG00000261060	AL160286.2	lncRNA	royalblue	0.00836118	0.967665	0.0878275	0.669645	0.385664	0.0516758	0.101806	0.620693	-0.0823028	0.689375
ENSG00000175970	UNC119B	protein_coding	royalblue	0.333103	0.0963437	0.343644	0.085639	0.378784	0.0563602	0.0951281	0.643899	0.134596	0.512116
ENSG00000113300	CNOT6	protein_coding	royalblue	-0.00374663	0.985508	0.0135588	0.947586	0.360738	0.070224	-0.0534138	0.795521	0.0685234	0.739429
ENSG00000145908	ZNF300	protein_coding	royalblue	0.295915	0.142166	-0.0586231	0.776055	0.348084	0.0814095	-0.064857	0.752933	0.4752	0.0141543
ENSG00000140575	IQGAP1	protein_coding	royalblue	0.173083	0.397801	0.263394	0.193567	0.328889	0.100893	0.3357	0.0936182	-0.109847	0.593212
ENSG00000281789	NA	NA	royalblue	0.223495	0.272416	0.101472	0.621844	0.32843	0.101398	0.15641	0.445446	0.330694	0.0989248
ENSG00000221916	C19orf73	protein_coding	royalblue	-0.24366	0.230332	-0.232078	0.25394	-0.421727	0.0318823	-0.188863	0.355481	0.0476117	0.817343
ENSG00000154930	ACSS1	protein_coding	royalblue	-0.341263	0.0879746	-0.355814	0.0744275	-0.47727	0.0136815	0.0300269	0.884229	-0.209201	0.30505
ENSG00000138495	COX17	protein_coding	royalblue	-0.415436	0.0348071	-0.298496	0.138556	-0.520264	0.00643865	-0.18644	0.361802	-0.299494	0.137177
ENSG00000182013	PNMA8A	protein_coding	red	0.787013	1.85071e-06	0.76264	5.9225e-06	0.228041	0.262527	0.467134	0.0161275	0.0965777	0.638832
ENSG00000227825	SLC9A7P1	transcribed_processed_pseudogene	red	0.784682	2.0816e-06	0.73224	2.11553e-05	0.451479	0.0206023	0.412508	0.0362396	0.270703	0.181037
ENSG00000184619	KRBA2	protein_coding	red	0.708385	5.13407e-05	0.623263	0.00067052	0.549803	0.0036186	0.440341	0.0243651	0.313556	0.1188
ENSG00000197879	MYO1C	protein_coding	red	0.691181	9.24045e-05	0.698944	7.12323e-05	0.395296	0.0456362	0.53328	0.00502642	0.348821	0.0807234
ENSG00000215374	FAM66B	lncRNA	red	0.676938	0.00014601	0.739206	1.60457e-05	0.369368	0.0633002	0.364937	0.0667858	0.219795	0.280641
ENSG00000169118	CSNK1G1	protein_coding	red	0.649512	0.000329957	0.743676	1.33762e-05	0.427913	0.0292021	0.39706	0.044593	0.204989	0.31511
ENSG00000185070	FLRT2	protein_coding	red	0.624668	0.000646583	0.56881	0.00242768	0.419704	0.0328008	-0.0837683	0.684121	0.149469	0.466142
ENSG00000165046	LETM2	protein_coding	red	0.622283	0.000687667	0.845572	5.39509e-08	0.131396	0.522286	0.562267	0.00279269	0.101231	0.622677
ENSG00000230454	U73166.1	lncRNA	red	0.617858	0.000769925	0.714909	4.06391e-05	0.131034	0.523443	0.542861	0.00416268	0.219973	0.280241
ENSG00000100739	BDKRB1	protein_coding	red	0.614114	0.00084606	0.801923	8.41707e-07	0.229904	0.25854	0.145832	0.477181	0.20791	0.308112
ENSG00000257556	LINC02298	lncRNA	red	0.613345	0.000862485	0.624743	0.000645327	0.100082	0.62665	0.228248	0.262082	0.14756	0.47192
ENSG00000258285	TESC-AS1	lncRNA	red	0.612571	0.0008793	0.745014	1.26586e-05	0.570402	0.00234531	0.231853	0.254413	-0.0503753	0.806932
ENSG00000274750	HIST1H3E	protein_coding	red	0.604402	0.00107471	0.565969	0.0025808	0.286738	0.155549	0.00437309	0.983085	0.519237	0.00656308
ENSG00000067369	TP53BP1	protein_coding	red	0.604127	0.00108188	0.849845	3.94319e-08	0.342592	0.0866649	0.318181	0.113169	0.182033	0.37346
ENSG00000259674	AC092868.1	processed_pseudogene	red	0.602885	0.00111484	0.853376	3.02114e-08	0.271915	0.179015	0.270306	0.181704	0.0716627	0.727926
ENSG00000258793	AL355102.4	lncRNA	red	0.597985	0.0012535	0.818481	3.2358e-07	0.286306	0.156201	0.248095	0.221691	0.222138	0.275416
ENSG00000275343	AC010999.1	lncRNA	red	0.597665	0.00126306	0.62656	0.000615519	0.156873	0.444082	0.530056	0.00534912	0.204743	0.315705
ENSG00000167595	PROSER3	protein_coding	red	0.59302	0.00140893	0.669649	0.000182809	0.367978	0.0643782	0.156321	0.44571	0.215258	0.290937
ENSG00000253190	AC084082.1	lncRNA	red	0.592283	0.00143336	0.780631	2.54508e-06	0.452027	0.0204303	0.0753403	0.714523	0.0820831	0.690164
ENSG00000261633	AC018552.4	lncRNA	red	0.587455	0.00160263	0.746214	1.20436e-05	0.0809478	0.694245	0.386972	0.050821	-0.000872563	0.996625
ENSG00000257327	AC012555.1	lncRNA	red	0.584725	0.00170575	0.756805	7.66902e-06	0.321797	0.108906	0.494127	0.0102955	0.0218836	0.915495
ENSG00000258603	AC005225.2	lncRNA	red	0.584582	0.00171128	0.934351	3.01715e-12	0.124456	0.544676	0.200357	0.326406	0.0837456	0.684203
ENSG00000173040	EVC2	protein_coding	red	0.584198	0.00172629	0.607204	0.00100382	0.40863	0.0382087	0.564768	0.00264795	0.211634	0.29933
ENSG00000242419	PCDHGC4	protein_coding	red	0.582521	0.00179309	0.790709	1.53134e-06	0.318162	0.113192	0.233966	0.249989	0.326213	0.103864
ENSG00000255052	FAM66D	lncRNA	red	0.579821	0.00190534	0.679906	0.000133006	0.416644	0.0342295	0.579035	0.0019391	0.0703983	0.732552
ENSG00000226306	NPY6R	transcribed_processed_pseudogene	red	0.579409	0.00192298	0.529828	0.00537259	0.0120518	0.953405	0.413217	0.0358885	-0.0203566	0.921374
ENSG00000224739	AC016735.1	lncRNA	red	0.56807	0.00246678	0.892475	9.01596e-10	0.100073	0.626682	0.0458835	0.823869	0.234903	0.248041
ENSG00000156103	MMP16	protein_coding	red	0.565643	0.00259887	0.619018	0.000747586	0.229266	0.259902	-0.0163679	0.936746	0.0639445	0.756305
ENSG00000256087	ZNF432	protein_coding	red	0.56046	0.00290134	0.471469	0.0150407	0.182071	0.373358	0.308007	0.125822	0.32334	0.107124
ENSG00000112992	NNT	protein_coding	red	0.559223	0.0029778	0.74598	1.21614e-05	0.254103	0.210337	0.505876	0.00837409	0.0175976	0.932004
ENSG00000226121	AC009487.2	processed_pseudogene	red	0.557366	0.00309583	0.407465	0.0388164	0.492098	0.0106619	0.429437	0.0285706	-0.164793	0.421122
ENSG00000249526	AC008667.1	lncRNA	red	0.557184	0.00310762	0.666093	0.000203546	0.108951	0.596248	0.492709	0.0105503	0.0749578	0.715913
ENSG00000136449	MYCBPAP	protein_coding	red	0.555059	0.00324798	0.559537	0.00295823	0.170809	0.404122	0.461611	0.0176045	0.357255	0.0731775
ENSG00000168502	MTCL1	protein_coding	red	0.554855	0.00326174	0.597681	0.00126258	0.196245	0.336637	0.369597	0.0631242	0.187961	0.357826
ENSG00000111371	SLC38A1	protein_coding	red	0.552469	0.00342635	0.585516	0.00167528	0.600367	0.00118436	0.409764	0.0376242	0.280927	0.164473
ENSG00000012504	NR1H4	protein_coding	red	0.544304	0.00404418	0.590194	0.00150462	0.437683	0.0253407	0.091479	0.65672	-0.0715798	0.728229
ENSG00000253616	AC107959.3	lncRNA	red	0.541578	0.00427046	0.692355	8.88841e-05	0.419155	0.0330536	0.395503	0.0455126	0.0823222	0.689305
ENSG00000167637	ZNF283	protein_coding	red	0.539309	0.00446688	0.607984	0.000984826	0.395203	0.0456916	0.109155	0.595555	0.332668	0.0968067
ENSG00000138759	FRAS1	protein_coding	red	0.53912	0.00448363	0.642798	0.000398045	0.326674	0.103347	0.0540869	0.792999	0.150752	0.462278
ENSG00000272405	AL365181.3	lncRNA	red	0.538863	0.00450638	0.751823	9.50922e-06	0.310556	0.12256	0.326121	0.103966	0.10811	0.599105
ENSG00000171135	JAGN1	protein_coding	red	-0.536369	0.00473274	-0.472507	0.0147898	-0.381226	0.0546612	-0.345579	0.083776	-0.140319	0.494168
ENSG00000279949	AC022784.8	lncRNA	red	0.529142	0.00544373	0.7636	5.67224e-06	0.406666	0.0392376	0.293956	0.144951	0.161232	0.431363
ENSG00000249738	AC008691.1	lncRNA	red	0.52227	0.00620141	0.692926	8.72131e-05	0.384544	0.0524167	0.406618	0.0392634	-0.151451	0.460183
ENSG00000143702	CEP170	protein_coding	red	0.520728	0.00638311	0.797992	1.04256e-06	0.340995	0.088241	0.322004	0.108667	0.0264829	0.897819
ENSG00000227076	AL158166.1	lncRNA	red	0.516999	0.00684104	0.693783	8.47611e-05	0.501284	0.00908594	0.0654895	0.750598	-0.0522027	0.800064
ENSG00000261273	AC138512.1	lncRNA	red	0.515551	0.00702621	0.940418	9.72679e-13	0.238994	0.23966	0.117773	0.566649	-0.0172465	0.933358
ENSG00000203280	AL022323.1	lncRNA	red	0.513208	0.00733455	0.480245	0.0130249	0.43573	0.0260775	0.550115	0.00359564	-0.00292748	0.988676
ENSG00000279948	AC008895.1	TEC	red	0.507718	0.00810211	0.709084	5.00853e-05	0.463926	0.0169723	0.0131913	0.949004	-0.0349566	0.86538
ENSG00000241129	AC093719.1	transcribed_processed_pseudogene	red	0.505602	0.00841526	0.640132	0.000428298	0.219206	0.281964	-0.00172219	0.993338	0.169961	0.406494
ENSG00000186481	ANKRD20A5P	transcribed_unprocessed_pseudogene	red	0.503492	0.00873755	0.562205	0.00279632	0.39311	0.0469553	0.167663	0.412963	0.332834	0.0966296
ENSG00000007237	GAS7	protein_coding	red	0.501214	0.00909706	0.872632	6.18801e-09	0.320933	0.109914	-0.0475873	0.817435	-0.0542355	0.792442
ENSG00000166004	CEP295	protein_coding	red	0.501077	0.00911907	0.714023	4.19657e-05	0.44085	0.024182	0.0257162	0.900762	0.132878	0.517566
ENSG00000260285	AL133367.1	lncRNA	red	0.499192	0.00942653	0.831889	1.38684e-07	0.0418664	0.839083	0.0635344	0.757822	0.105636	0.607539
ENSG00000275183	LENG9	protein_coding	red	0.493784	0.0103566	0.505739	0.00839462	0.0667446	0.745972	0.212314	0.297745	-0.0893351	0.664297
ENSG00000179542	SLITRK4	protein_coding	red	0.49127	0.0108144	0.719113	3.48391e-05	0.321468	0.10929	0.394602	0.0460514	-0.0481213	0.815421
ENSG00000105738	SIPA1L3	protein_coding	red	0.490793	0.010903	0.576772	0.00203926	0.111434	0.587851	0.179751	0.379583	0.031362	0.879118
ENSG00000135749	PCNX2	protein_coding	red	0.486809	0.0116679	0.876183	4.49214e-09	0.243679	0.230295	0.168169	0.411533	0.120601	0.557302
ENSG00000104228	TRIM35	protein_coding	red	0.486658	0.0116978	0.565485	0.00260768	0.300266	0.136119	0.383857	0.0528757	0.252675	0.212999
ENSG00000173065	FAM222B	protein_coding	red	0.48568	0.0118925	0.602661	0.00112089	0.466295	0.016345	0.230468	0.257342	0.253926	0.210666
ENSG00000172828	CES3	protein_coding	red	0.482579	0.0125282	0.532477	0.00510521	-0.133423	0.515833	0.0377732	0.854642	-0.0488377	0.81272
ENSG00000254656	RTL1	protein_coding	red	0.481952	0.0126601	0.935223	2.58133e-12	0.0346193	0.866667	0.232298	0.253478	-0.0317424	0.877662
ENSG00000114349	GNAT1	protein_coding	red	0.481488	0.0127583	0.892684	8.818e-10	0.0279473	0.8922	-0.00114734	0.995562	-0.0501415	0.807811
ENSG00000122729	ACO1	protein_coding	red	0.48148	0.0127601	0.893132	8.40607e-10	0.154633	0.450698	0.348784	0.0807582	-0.131895	0.520694
ENSG00000207336	RNU6-658P	snRNA	red	0.479154	0.0132627	0.511427	0.00757664	0.0568848	0.782537	-0.0653306	0.751185	0.342734	0.0865263
ENSG00000277984	AP001264.1	unprocessed_pseudogene	red	0.478761	0.0133491	0.677234	0.000144667	0.122631	0.550638	-0.0291588	0.887555	0.20449	0.316315
ENSG00000163945	UVSSA	protein_coding	red	0.478395	0.0134302	0.658636	0.000253851	0.0620709	0.763243	0.374556	0.0593993	0.287945	0.15374
ENSG00000261229	AC021483.2	lncRNA	red	0.476772	0.0137942	0.646771	0.000356416	0.304592	0.130292	-0.0139914	0.945916	0.126706	0.53737
ENSG00000253476	AC091185.1	lncRNA	red	0.476663	0.0138189	0.88841	1.37725e-09	0.262631	0.194909	0.173824	0.395752	0.0945048	0.646082
ENSG00000054282	SDCCAG8	protein_coding	red	0.475581	0.0140663	0.770196	4.19209e-06	0.269251	0.18348	0.408917	0.0380599	-0.0290564	0.887948
ENSG00000273419	AC004877.1	lncRNA	red	0.472249	0.0148519	0.624092	0.000656299	0.155447	0.448288	0.178596	0.382703	0.137468	0.503067
ENSG00000184661	CDCA2	protein_coding	red	0.471012	0.0151523	0.804846	7.15705e-07	0.169095	0.408925	0.284051	0.159631	0.10535	0.608518
ENSG00000265046	AC004253.2	lncRNA	red	0.465063	0.016669	0.921341	2.46732e-11	0.191706	0.348152	0.119849	0.559781	0.130674	0.524597
ENSG00000166664	CHRFAM7A	protein_coding	red	0.464016	0.0169482	0.786269	1.92176e-06	0.0540973	0.79296	0.543405	0.00411766	-0.148936	0.467752
ENSG00000255650	FAM222A-AS1	lncRNA	red	0.463402	0.0171139	0.60837	0.000975553	-0.0242959	0.906219	0.425919	0.0300454	0.299791	0.13677
ENSG00000279771	AP000997.3	TEC	red	0.462783	0.0172821	0.513001	0.0073624	0.522534	0.00617076	0.474318	0.01436	-0.0336601	0.870331
ENSG00000135338	LCA5	protein_coding	red	0.462631	0.0173237	0.79914	9.79879e-07	0.370125	0.0627186	0.00156021	0.993965	0.0457822	0.824252
ENSG00000205669	ACOT6	protein_coding	red	0.461978	0.0175031	0.800396	9.15165e-07	0.13043	0.525377	0.150174	0.464016	0.14979	0.465174
ENSG00000198435	NRARP	protein_coding	red	0.461417	0.0176585	0.796712	1.1167e-06	0.298883	0.138021	0.13217	0.519818	0.125876	0.540059
ENSG00000268670	AC016586.1	lncRNA	red	0.460633	0.0178773	0.580726	0.00186707	0.185534	0.364181	-0.122548	0.550911	0.306095	0.128311
ENSG00000138600	SPPL2A	protein_coding	red	0.459835	0.0181024	0.754498	8.47753e-06	0.147608	0.471775	0.29152	0.148468	-0.0283106	0.890806
ENSG00000109819	PPARGC1A	protein_coding	red	0.458677	0.0184332	0.637431	0.000460981	0.0441678	0.83036	0.630983	0.000547925	-0.0196854	0.923959
ENSG00000227726	AP001271.1	lncRNA	red	0.456313	0.0191239	0.596526	0.00129756	0.265759	0.189449	0.122707	0.55039	0.0491555	0.811523
ENSG00000119661	DNAL1	protein_coding	red	0.454737	0.0195961	0.54362	0.00410002	0.492242	0.0106355	0.034087	0.8687	0.248818	0.220304
ENSG00000254154	AL359075.2	lncRNA	red	0.454702	0.0196067	0.829086	1.66545e-07	0.19381	0.342786	0.320404	0.110534	0.0339747	0.869129
ENSG00000215447	BX322557.1	lncRNA	red	0.453948	0.019836	0.70247	6.31241e-05	0.142265	0.488136	0.248753	0.220428	0.071173	0.729716
ENSG00000088992	TESC	protein_coding	red	0.45282	0.0201833	0.528236	0.0055389	0.408033	0.0385194	0.29584	0.142272	-0.012094	0.953242
ENSG00000160007	ARHGAP35	protein_coding	red	0.452733	0.0202101	0.47175	0.0149724	0.201402	0.323837	-0.0405228	0.844184	0.199628	0.328205
ENSG00000120341	SEC16B	protein_coding	red	0.450725	0.0208412	0.730623	2.25308e-05	-0.031367	0.879099	0.330206	0.0994541	0.178803	0.382144
ENSG00000254978	ALG1L9P	transcribed_unprocessed_pseudogene	red	0.449542	0.0212203	0.620282	0.000723861	0.104694	0.610763	0.346833	0.0825852	0.0310558	0.88029
ENSG00000273901	AC012313.9	lncRNA	red	0.449532	0.0212237	0.713254	4.31478e-05	0.0777959	0.705619	-0.104499	0.611433	0.237633	0.242427
ENSG00000159173	TNNI1	protein_coding	red	0.445562	0.0225375	0.729708	2.33435e-05	0.0529775	0.797157	0.357951	0.07258	0.129163	0.529444
ENSG00000226101	LINC02097	lncRNA	red	0.44537	0.0226027	0.776115	3.16874e-06	0.307133	0.126956	-0.00912034	0.96473	0.19599	0.337277
ENSG00000230982	DSTNP1	processed_pseudogene	red	0.444125	0.023029	0.600138	0.00119086	0.091164	0.657831	0.0819534	0.69063	0.338794	0.0904474
ENSG00000140459	CYP11A1	protein_coding	red	0.44392	0.0230998	0.692134	8.95374e-05	0.0911288	0.657956	0.581407	0.00183868	-0.0839622	0.683427
ENSG00000175344	CHRNA7	protein_coding	red	0.442848	0.0234732	0.848877	4.23714e-08	0.0719187	0.72699	0.370047	0.0627788	-0.10094	0.623684
ENSG00000258999	AL136040.1	lncRNA	red	0.438407	0.0250719	0.661744	0.000231694	0.0478414	0.816476	0.292237	0.147426	-0.143915	0.483053
ENSG00000198626	RYR2	protein_coding	red	0.438002	0.0252223	0.902791	2.83918e-10	0.132844	0.517672	0.219849	0.28052	-0.0583423	0.777101
ENSG00000203327	AC012358.1	lncRNA	red	0.436411	0.0258188	0.573174	0.0022076	0.13845	0.499995	0.138348	0.500313	0.0724566	0.725026
ENSG00000112118	MCM3	protein_coding	red	0.435845	0.0260338	0.575545	0.00209537	0.131478	0.522025	0.449541	0.0212207	0.107128	0.602445
ENSG00000249274	PDLIM1P4	processed_pseudogene	red	0.434548	0.0265321	0.930723	5.64501e-12	0.0751984	0.715038	0.097902	0.634218	-0.0826208	0.688234
ENSG00000111077	TNS2	protein_coding	red	0.432994	0.0271389	0.757506	7.4375e-06	0.209089	0.305316	0.271571	0.179588	-0.0186451	0.927967
ENSG00000152104	PTPN14	protein_coding	red	0.431944	0.0275554	0.892494	8.99763e-10	0.223418	0.272587	0.0828696	0.687341	-0.0156961	0.939337
ENSG00000140563	MCTP2	protein_coding	red	0.430211	0.028254	0.602793	0.00111733	0.101103	0.623119	0.407973	0.0385507	-0.198935	0.329924
ENSG00000267265	AC011476.3	lncRNA	red	0.426834	0.0296563	0.859968	1.8027e-08	0.128736	0.530816	0.00291624	0.988719	0.0666266	0.746406
ENSG00000176222	ZNF404	protein_coding	red	0.426496	0.0297995	0.51722	0.00681314	0.0788109	0.701949	-0.110986	0.589364	0.41922	0.0330237
ENSG00000104691	UBXN8	protein_coding	red	0.424705	0.0305683	0.652915	0.000299515	0.521144	0.00633364	0.154857	0.450035	0.0859335	0.676386
ENSG00000166068	SPRED1	protein_coding	red	0.424437	0.030685	0.698207	7.30411e-05	0.439676	0.0246064	0.00405714	0.984307	0.103129	0.616137
ENSG00000229953	AL590666.2	lncRNA	red	0.423763	0.0309793	0.673982	0.000160066	0.388281	0.0499762	0.248625	0.220674	0.0458643	0.823942
ENSG00000139514	SLC7A1	protein_coding	red	0.421794	0.0318523	0.751386	9.68796e-06	0.0849606	0.679858	0.335997	0.0933105	0.0240116	0.907311
ENSG00000239521	GATS	protein_coding	red	-0.421519	0.0319761	-0.471274	0.0150884	-0.216237	0.288695	-0.254819	0.209012	-0.0546949	0.790722
ENSG00000224950	AL390066.1	lncRNA	red	0.421492	0.0319881	0.807419	6.19088e-07	0.171064	0.40341	0.127108	0.536069	0.0454838	0.82538
ENSG00000065989	PDE4A	protein_coding	red	0.420874	0.032267	0.528014	0.00556247	0.276472	0.171554	0.570557	0.00233745	0.029729	0.88537
ENSG00000198892	SHISA4	protein_coding	red	0.419117	0.0330709	0.718583	3.55276e-05	0.340742	0.0884921	0.241952	0.233717	0.0949293	0.644595
ENSG00000229109	AL137847.1	lncRNA	red	0.418813	0.0332117	0.441807	0.0238403	0.484265	0.0121792	0.226357	0.266162	0.0536426	0.794664
ENSG00000159261	CLDN14	protein_coding	red	0.418593	0.0333138	0.822675	2.50125e-07	0.151814	0.459095	0.0973831	0.636024	0.0610469	0.767042
ENSG00000251387	AC008667.3	lncRNA	red	0.416241	0.0344214	0.812932	4.5043e-07	-0.0563052	0.784701	0.197673	0.333063	-0.0845136	0.681455
ENSG00000053524	MCF2L2	protein_coding	red	0.413171	0.0359114	0.775799	3.2171e-06	0.0346998	0.86636	0.358254	0.0723208	-0.197503	0.333487
ENSG00000205312	KRT17P4	transcribed_unprocessed_pseudogene	red	0.412102	0.0364419	0.930544	5.81737e-12	0.0248157	0.904221	0.0859717	0.676249	-0.016275	0.937104
ENSG00000151474	FRMD4A	protein_coding	red	0.410265	0.0373685	0.778388	2.83957e-06	0.235237	0.24735	-0.100834	0.624048	0.0830725	0.686614
ENSG00000268549	NA	NA	red	0.410238	0.0373823	0.876192	4.48834e-09	0.18176	0.37419	-0.0279879	0.892044	0.0148739	0.94251
ENSG00000198846	TOX	protein_coding	red	0.410176	0.0374137	0.904842	2.22209e-10	0.0467956	0.820423	0.0378442	0.854372	-0.0460466	0.823253
ENSG00000230121	AL445070.1	lncRNA	red	0.409939	0.0375344	0.924016	1.65197e-11	0.0225009	0.913121	0.0507851	0.80539	-0.0344771	0.86721
ENSG00000198756	COLGALT2	protein_coding	red	0.408101	0.0384838	0.927693	9.28589e-12	0.0325099	0.874727	0.0666233	0.746418	-0.0428718	0.835269
ENSG00000175556	LONRF3	protein_coding	red	0.40785	0.0386146	0.582969	0.00177503	0.124815	0.543506	0.421009	0.032206	-0.176802	0.387579
ENSG00000279187	AC027601.5	TEC	red	0.407381	0.0388606	0.594745	0.00135317	0.16474	0.421272	0.469271	0.0155838	0.148983	0.467608
ENSG00000181322	NME9	protein_coding	red	0.406375	0.0393922	0.849822	3.95015e-08	0.234388	0.24911	0.220878	0.278217	-0.103948	0.613322
ENSG00000125430	HS3ST3B1	protein_coding	red	0.405816	0.03969	0.919814	3.08278e-11	0.0103491	0.959982	0.0574888	0.780283	-0.0498486	0.808913
ENSG00000196081	ZNF724	protein_coding	red	0.405449	0.0398863	0.582627	0.00178882	0.209676	0.303929	0.0974343	0.635846	0.275891	0.172493
ENSG00000109758	HGFAC	protein_coding	red	0.404004	0.0406677	0.874424	5.2706e-09	0.0088524	0.965766	0.0422048	0.837799	-0.0555171	0.787646
ENSG00000243083	LINC00870	lncRNA	red	0.403612	0.0408816	0.874879	5.05824e-09	0.00825314	0.968082	0.102852	0.617087	0.0107488	0.958438
ENSG00000161558	TMEM143	protein_coding	red	0.403443	0.0409741	0.697416	7.50244e-05	-0.167131	0.414469	0.341059	0.0881767	-0.0374856	0.855738
ENSG00000268747	AC022432.1	processed_pseudogene	red	0.40194	0.0418043	0.317321	0.114201	0.303539	0.131694	0.571911	0.00226946	-0.0165749	0.935947
ENSG00000215246	AC116351.1	lncRNA	red	0.400591	0.0425613	0.705113	5.75918e-05	0.331389	0.0981749	0.411607	0.0366895	-0.0868374	0.673166
ENSG00000237073	AL162727.2	lncRNA	red	0.400081	0.0428498	0.827266	1.87245e-07	0.329062	0.100703	0.0225398	0.912971	0.0460611	0.823198
ENSG00000181541	MAB21L2	protein_coding	red	0.399053	0.043437	0.844527	5.81681e-08	0.11229	0.584968	-0.0671709	0.744402	-0.0442728	0.829962
ENSG00000229534	HNRNPA1P53	processed_pseudogene	red	0.39827	0.0438884	0.653494	0.000294586	0.0869413	0.672796	0.178869	0.381965	0.0201034	0.922348
ENSG00000279353	AP001324.3	TEC	red	0.396183	0.0451089	0.914911	6.12387e-11	0.101939	0.620234	0.187928	0.357913	0.0497221	0.809389
ENSG00000172915	NBEA	protein_coding	red	0.394477	0.046127	0.444644	0.0228504	0.197011	0.334717	-0.150411	0.463304	0.0458638	0.823944
ENSG00000196214	ZNF766	protein_coding	red	0.394012	0.0464073	0.632421	0.000527386	0.142936	0.486067	-0.0913664	0.657117	0.0398136	0.846879
ENSG00000091127	PUS7	protein_coding	red	0.393241	0.0468757	0.691686	9.08763e-05	0.210937	0.300964	0.0706278	0.731712	-0.0895215	0.663637
ENSG00000215241	LINC02449	lncRNA	red	0.39188	0.0477107	0.801218	8.74961e-07	0.131112	0.523195	0.052829	0.797714	-0.0295373	0.886105
ENSG00000157388	CACNA1D	protein_coding	red	0.391811	0.0477534	0.78496	2.05281e-06	0.250136	0.217789	-0.0921	0.654531	0.0965851	0.638807
ENSG00000246145	RRS1-AS1	lncRNA	red	0.391115	0.0481856	0.669272	0.000184916	0.135123	0.51045	0.219312	0.281727	-0.0546523	0.790882
ENSG00000167912	AC090152.1	lncRNA	red	0.388508	0.0498308	0.720927	3.25719e-05	0.113464	0.581025	0.0403498	0.844841	-0.0713054	0.729232
ENSG00000102531	FNDC3A	protein_coding	red	0.388337	0.0499407	0.867224	9.89984e-09	0.0184759	0.928619	0.0925436	0.652969	0.0926117	0.65273
ENSG00000237399	PITRM1-AS1	lncRNA	red	0.38766	0.0503758	0.667665	0.00019414	0.41107	0.0369602	0.204893	0.315342	0.165012	0.420495
ENSG00000074964	ARHGEF10L	protein_coding	red	0.38716	0.0506987	0.653652	0.000293255	0.154207	0.45196	0.429341	0.02861	0.0265788	0.89745
ENSG00000229207	SERPINH1P1	processed_pseudogene	red	0.386878	0.0508822	0.692295	8.90619e-05	0.181298	0.375428	0.10469	0.610778	0.0109795	0.957547
ENSG00000280328	NA	NA	red	0.385106	0.0520438	0.491778	0.0107206	0.233726	0.250487	0.453972	0.0198288	0.197161	0.334342
ENSG00000275367	AC092111.1	lncRNA	red	0.384087	0.0527221	0.644957	0.000374925	0.14181	0.489543	0.285335	0.157672	0.0908886	0.658803
ENSG00000018408	WWTR1	protein_coding	red	0.383628	0.0530291	0.448681	0.0214999	0.422121	0.0317063	0.382221	0.0539807	-0.0163674	0.936748
ENSG00000272068	AL365181.2	lncRNA	red	0.383296	0.0532528	0.811195	4.9844e-07	-0.0288333	0.888803	0.114114	0.578847	0.0851975	0.679012
ENSG00000135314	KHDC1	protein_coding	red	0.382577	0.0537383	0.606797	0.00101386	0.198992	0.329781	0.207983	0.30794	0.147027	0.473539
ENSG00000264453	NA	NA	red	0.381701	0.0543354	0.593676	0.00138749	-0.0128476	0.950332	-0.114379	0.577957	0.00720969	0.972116
ENSG00000108557	RAI1	protein_coding	red	0.38089	0.0548926	0.632914	0.000520503	0.253999	0.210532	0.380462	0.0551885	0.0970142	0.63731
ENSG00000242686	AC107464.1	lncRNA	red	0.379456	0.055889	0.597842	0.00125777	0.0624763	0.76174	0.461592	0.0176099	-0.151034	0.461433
ENSG00000235681	AC245884.3	processed_pseudogene	red	0.378313	0.0566928	0.777991	2.89482e-06	0.121194	0.555353	0.00471982	0.981744	0.237599	0.242497
ENSG00000185186	LINC00313	lncRNA	red	0.376329	0.0581096	0.727177	2.5729e-05	0.182279	0.372804	0.175863	0.390145	0.120745	0.556829
ENSG00000170775	GPR37	protein_coding	red	0.376235	0.0581779	0.699219	7.05686e-05	0.29249	0.147061	0.268128	0.185385	-0.181292	0.375442
ENSG00000233154	LINC01762	lncRNA	red	0.373659	0.0600601	0.657531	0.00026216	-0.0314546	0.878763	0.273471	0.176443	-0.0777999	0.705604
ENSG00000187097	ENTPD5	protein_coding	red	0.370673	0.0623008	0.508082	0.00804911	0.0644732	0.754351	-0.0861116	0.675751	0.250362	0.217361
ENSG00000262050	AC005696.1	lncRNA	red	0.369268	0.0633772	0.589597	0.00152553	-0.0128725	0.950235	0.553852	0.00333007	0.0680426	0.741196
ENSG00000244731	C4A	protein_coding	red	0.368239	0.0641746	0.739594	1.57963e-05	0.293872	0.145071	0.267786	0.185969	-0.0855596	0.677719
ENSG00000253910	PCDHGB2	protein_coding	red	0.364156	0.0674159	0.498777	0.00949532	0.108338	0.59833	0.080405	0.696199	0.457086	0.0188959
ENSG00000205864	KRTAP5-6	protein_coding	red	0.363087	0.0682847	0.684862	0.000113551	0.0431909	0.83406	-0.0179659	0.930584	0.0168586	0.934853
ENSG00000169862	CTNND2	protein_coding	red	0.362539	0.0687336	0.562048	0.00280567	0.380863	0.0549113	0.022549	0.912935	0.0668673	0.74552
ENSG00000267013	LINC01929	lncRNA	red	0.361901	0.0692586	0.81183	4.80377e-07	0.0696695	0.735223	-0.0182554	0.929468	-0.0285646	0.889832
ENSG00000281920	AC007389.5	lncRNA	red	0.361199	0.0698407	0.682234	0.000123528	0.0212823	0.91781	0.0818083	0.691151	0.225796	0.267381
ENSG00000135902	CHRND	protein_coding	red	0.360831	0.0701469	0.878501	3.62559e-09	-0.0375247	0.855589	0.0499697	0.808458	-0.084726	0.680696
ENSG00000146426	TIAM2	protein_coding	red	0.36028	0.0706071	0.495567	0.010042	0.260535	0.198628	-0.19171	0.348142	0.122787	0.550127
ENSG00000128928	IVD	protein_coding	red	0.360098	0.0707602	0.711037	4.67225e-05	-0.00191405	0.992596	0.144045	0.482655	-0.004688	0.981867
ENSG00000175920	DOK7	protein_coding	red	0.359754	0.0710489	0.866396	1.06186e-08	0.111319	0.588239	0.232079	0.253939	-0.0839044	0.683634
ENSG00000254042	AC011365.1	lncRNA	red	0.357755	0.0727481	0.911629	9.47799e-11	0.0356203	0.862848	0.0242439	0.906418	-0.0566456	0.78343
ENSG00000105737	GRIK5	protein_coding	red	0.35697	0.0734239	0.492824	0.0105295	-0.0858747	0.676596	0.487391	0.0115534	-0.0527076	0.798169
ENSG00000257800	FNBP1P1	processed_pseudogene	red	0.355921	0.0743341	0.710688	4.7308e-05	0.144486	0.4813	0.044985	0.827267	0.184618	0.366596
ENSG00000064225	ST3GAL6	protein_coding	red	0.355512	0.0746908	0.821203	2.73994e-07	0.00667363	0.974188	0.103151	0.616061	-0.136997	0.504547
ENSG00000116141	MARK1	protein_coding	red	0.354178	0.0758658	0.707821	5.23733e-05	0.0647261	0.753417	0.324504	0.105794	-0.0300818	0.884019
ENSG00000176919	C8G	protein_coding	red	0.352941	0.0769664	0.781343	2.45752e-06	-0.080914	0.694366	0.285945	0.156746	-0.074365	0.71807
ENSG00000224389	C4B	protein_coding	red	0.352314	0.0775301	0.706837	5.422e-05	0.265223	0.190378	0.133073	0.516946	-0.0961885	0.640191
ENSG00000257763	OR5BK1P	unprocessed_pseudogene	red	0.351153	0.0785803	0.67537	0.000153327	0.179802	0.379446	0.0552271	0.788731	0.205032	0.315007
ENSG00000184908	CLCNKB	protein_coding	red	0.348935	0.0806177	0.653176	0.000297285	0.147601	0.471794	-0.021729	0.916091	0.082811	0.687552
ENSG00000187720	THSD4	protein_coding	red	0.348664	0.0808694	0.887478	1.51427e-09	0.113119	0.582184	0.0775399	0.706545	-0.0495735	0.809949
ENSG00000236829	Z97634.1	transcribed_processed_pseudogene	red	0.348379	0.0811346	0.853991	2.88193e-08	-0.0754802	0.714015	0.193889	0.342585	-0.0935539	0.649418
ENSG00000267053	AC012617.1	lncRNA	red	0.347814	0.081662	0.832538	1.32867e-07	0.0150247	0.941928	0.105979	0.606365	-0.0352175	0.864384
ENSG00000125931	CITED1	protein_coding	red	0.347177	0.0822602	0.899701	4.06573e-10	0.04852	0.813918	0.0493215	0.810898	-0.0646854	0.753567
ENSG00000232259	AL158166.2	lncRNA	red	0.345773	0.083591	0.590398	0.00149753	0.159045	0.437722	0.00422749	0.983648	-0.146505	0.475129
ENSG00000228741	SPATA13	lncRNA	red	0.344969	0.0843598	0.610295	0.000930365	0.113428	0.581145	0.229939	0.258466	0.241114	0.23539
ENSG00000259904	ACTG1P15	processed_pseudogene	red	0.344798	0.0845242	0.673135	0.000164306	0.156485	0.445227	-0.0252486	0.902558	0.249199	0.219576
ENSG00000229380	AC147651.1	lncRNA	red	0.344096	0.0852011	0.862814	1.43075e-08	0.0321102	0.876255	-0.0245403	0.90528	-0.057189	0.781402
ENSG00000278949	AC127070.5	TEC	red	0.343227	0.0860447	0.789585	1.62276e-06	0.332443	0.0970464	-0.0700579	0.733799	0.0681168	0.740923
ENSG00000237025	AL121601.2	processed_pseudogene	red	0.342494	0.0867609	0.54388	0.0040787	0.295448	0.142827	0.425425	0.0302574	0.205843	0.313054
ENSG00000196361	ELAVL3	protein_coding	red	0.33909	0.0901475	0.839083	8.53458e-08	-0.00495335	0.980841	0.099634	0.628203	-0.0458884	0.823851
ENSG00000184992	BRI3BP	protein_coding	red	0.339061	0.0901771	0.606389	0.00102402	0.234098	0.249712	0.228628	0.261265	0.0976145	0.635219
ENSG00000114378	HYAL1	protein_coding	red	0.336183	0.0931176	0.520613	0.00639684	-0.0572768	0.781074	0.238569	0.240523	-0.0278415	0.892605
ENSG00000223774	AL513217.1	lncRNA	red	0.335224	0.0941137	0.898953	4.42733e-10	0.102803	0.617256	0.099554	0.62848	0.00249426	0.990352
ENSG00000261934	PCDHGA9	protein_coding	red	0.334883	0.0944696	0.765989	5.08945e-06	0.114675	0.576968	0.0411419	0.841833	-0.0459206	0.823729
ENSG00000225362	CT62	protein_coding	red	0.334545	0.0948229	0.878518	3.61983e-09	0.0354934	0.863332	0.0641251	0.755638	-0.0767033	0.709576
ENSG00000010310	GIPR	protein_coding	red	0.3325	0.0969857	0.519539	0.00652622	0.174622	0.393551	0.0145863	0.943619	0.217581	0.285636
ENSG00000148339	SLC25A25	protein_coding	red	0.330499	0.0991364	0.851646	3.44516e-08	0.0158529	0.938732	0.00268627	0.989609	-0.0864347	0.6746
ENSG00000128833	MYO5C	protein_coding	red	0.329904	0.0997826	0.643085	0.000394904	0.211451	0.299759	0.181252	0.375549	-0.061098	0.766852
ENSG00000247877	AC021086.1	lncRNA	red	0.328536	0.101281	0.636038	0.00047867	0.361477	0.0696093	-0.0544395	0.791678	-0.118762	0.563374
ENSG00000163485	ADORA1	protein_coding	red	0.327851	0.102038	0.906445	1.82776e-10	0.146617	0.474786	0.0193243	0.92535	-0.0624998	0.761653
ENSG00000159263	SIM2	protein_coding	red	0.325714	0.104424	0.550413	0.00357378	-0.0819356	0.690694	0.146731	0.47444	0.366779	0.0653196
ENSG00000137806	NDUFAF1	protein_coding	red	0.324977	0.105257	0.722965	3.01824e-05	0.0657615	0.749595	0.0938073	0.648528	-0.0262622	0.898666
ENSG00000252516	RNA5SP82	rRNA	red	0.323806	0.10659	0.804152	7.43958e-07	0.16801	0.411984	-0.07604	0.711982	0.0313325	0.879231
ENSG00000231794	AC009542.1	lncRNA	red	0.32181	0.108891	0.904641	2.27665e-10	0.125992	0.539683	0.0773311	0.707301	-0.0606336	0.768577
ENSG00000181773	GPR3	protein_coding	red	0.320205	0.110769	0.673332	0.000163311	-0.0476312	0.817269	0.0426025	0.83629	-0.0356127	0.862877
ENSG00000259417	CTXND1	protein_coding	red	0.319427	0.111687	0.906752	1.75994e-10	-0.00799568	0.969077	0.00182237	0.992951	-0.0708671	0.730836
ENSG00000117791	MARC2	protein_coding	red	0.318732	0.112512	0.611836	0.000895518	0.0901911	0.661268	0.483268	0.0123846	-0.0769678	0.708617
ENSG00000181450	ZNF678	protein_coding	red	0.317129	0.114432	0.828675	1.71029e-07	0.231672	0.254794	0.0955152	0.642544	0.000425595	0.998354
ENSG00000279419	AC004925.1	TEC	red	0.313809	0.118486	0.618651	0.00075458	0.0702087	0.733247	0.410121	0.0374418	-0.167614	0.413101
ENSG00000186510	CLCNKA	protein_coding	red	0.312214	0.120472	0.877184	4.09727e-09	0.0308847	0.880945	0.167266	0.414087	-0.0858291	0.676758
ENSG00000074695	LMAN1	protein_coding	red	0.310475	0.122663	0.672957	0.000165206	0.0491929	0.811382	0.209828	0.303571	0.114319	0.578159
ENSG00000186638	KIF24	protein_coding	red	0.310165	0.123056	0.732338	2.10743e-05	0.0602467	0.770014	-0.0344171	0.86744	-0.0644411	0.75447
ENSG00000223723	BX842568.2	processed_pseudogene	red	0.308423	0.125286	0.755134	8.24711e-06	-0.0615089	0.765327	-0.0250594	0.903285	-0.0803956	0.696233
ENSG00000267348	AC011489.1	lncRNA	red	0.305413	0.129208	0.616819	0.000790436	-0.0135762	0.947518	0.173675	0.396164	-0.11984	0.559811
ENSG00000173041	ZNF680	protein_coding	red	0.30505	0.129687	0.67027	0.000179387	-0.00359215	0.986105	0.239195	0.239253	-0.0692542	0.736746
ENSG00000183598	HIST2H3D	protein_coding	red	0.304791	0.130028	0.619823	0.000732395	0.184492	0.366928	0.0257177	0.900756	0.185853	0.363342
ENSG00000122870	BICC1	protein_coding	red	0.304408	0.130536	0.592474	0.00142702	0.338731	0.0905103	-0.0635161	0.75789	0.190623	0.350934
ENSG00000267201	LINC01775	lncRNA	red	0.302631	0.132911	0.554185	0.00330728	-0.0343098	0.867849	0.0579047	0.778732	0.022016	0.914986
ENSG00000163638	ADAMTS9	protein_coding	red	0.302567	0.132997	0.726644	2.62587e-05	0.0503566	0.807002	-0.0230841	0.910877	0.0694079	0.736183
ENSG00000245479	LINC01585	lncRNA	red	0.301862	0.133947	0.790529	1.54565e-06	0.0839531	0.68346	0.108409	0.598089	0.0731518	0.722489
ENSG00000188488	SERPINA5	protein_coding	red	0.300942	0.135196	0.778992	2.75744e-06	0.0889167	0.66578	-0.0318424	0.87728	0.0397274	0.847207
ENSG00000188295	ZNF669	protein_coding	red	0.298895	0.138003	0.799577	9.56892e-07	0.281006	0.164349	-0.0212599	0.917896	0.0293664	0.886759
ENSG00000164976	MYORG	protein_coding	red	0.29615	0.141834	0.593394	0.00139669	-0.0181316	0.929945	-0.135085	0.510569	-0.0781737	0.704252
ENSG00000100987	VSX1	protein_coding	red	0.295386	0.142914	0.644313	0.000381694	0.00526265	0.979644	0.000725272	0.997194	0.237224	0.243262
ENSG00000164211	STARD4	protein_coding	red	0.293897	0.145036	0.575886	0.00207966	0.0958682	0.64131	0.0230429	0.911036	0.0794708	0.699567
ENSG00000160439	RDH13	protein_coding	red	0.293667	0.145364	0.723719	2.93379e-05	0.0841931	0.682601	0.0228683	0.911707	0.0370423	0.857426
ENSG00000234134	AL158835.2	lncRNA	red	0.293597	0.145465	0.699191	7.06357e-05	0.116882	0.569608	-0.0334053	0.871305	0.136027	0.507598
ENSG00000122574	WIPF3	protein_coding	red	0.289907	0.15083	0.545513	0.00394713	-0.0681804	0.740689	0.58338	0.00175861	-0.175758	0.390434
ENSG00000132334	PTPRE	protein_coding	red	0.289871	0.150883	0.67005	0.000180594	0.408159	0.0384536	0.12519	0.542288	-0.114128	0.578798
ENSG00000157657	ZNF618	protein_coding	red	0.288381	0.15309	0.741734	1.44832e-05	0.346303	0.0830868	-0.0414391	0.840704	-0.0631675	0.75918
ENSG00000196247	ZNF107	protein_coding	red	0.288293	0.153221	0.631324	0.000542995	-0.0884691	0.667367	0.36319	0.0682003	-0.0741609	0.718812
ENSG00000100321	SYNGR1	protein_coding	red	0.28544	0.157512	0.565489	0.00260747	0.225136	0.26882	0.194976	0.339833	-0.0731091	0.722645
ENSG00000143570	SLC39A1	protein_coding	red	0.284758	0.15855	0.518629	0.00663765	0.22786	0.262916	0.541862	0.00424642	0.0764326	0.710557
ENSG00000223768	LINC00205	lncRNA	red	0.284607	0.15878	0.54199	0.00423563	-0.142813	0.486447	0.182742	0.37157	0.0595794	0.772496
ENSG00000105875	WDR91	protein_coding	red	0.283688	0.160189	0.727263	2.56444e-05	0.197051	0.334618	0.229027	0.260412	-0.0941517	0.64732
ENSG00000147576	ADHFE1	protein_coding	red	0.283226	0.160901	0.621742	0.000697301	0.134572	0.51219	0.20975	0.303753	0.0102203	0.96048
ENSG00000183340	JRKL	protein_coding	red	0.278981	0.167539	0.55532	0.00323047	0.302188	0.133508	0.0738342	0.720002	0.193724	0.343004
ENSG00000205683	DPF3	protein_coding	red	0.277785	0.169446	0.773157	3.64818e-06	-0.00192789	0.992542	-0.00752537	0.970895	-0.105494	0.608024
ENSG00000278090	AC036108.4	lncRNA	red	0.2768	0.171026	0.82575	2.06228e-07	-0.043181	0.834098	0.0670351	0.744902	-0.0301866	0.883618
ENSG00000237172	B3GNT9	protein_coding	red	0.275304	0.173446	0.558166	0.00304453	0.00120596	0.995335	-0.0467872	0.820455	0.282076	0.16268
ENSG00000167562	ZNF701	protein_coding	red	0.275122	0.173741	0.587352	0.00160643	0.161885	0.429474	0.319096	0.11208	0.117253	0.568376
ENSG00000105245	NUMBL	protein_coding	red	0.275083	0.173804	0.550121	0.00359519	-0.0366787	0.858812	0.246227	0.225304	-0.0836695	0.684475
ENSG00000273582	AC009093.5	lncRNA	red	0.273357	0.17663	0.834463	1.16874e-07	0.0959125	0.641155	0.041301	0.841228	-0.0857554	0.677021
ENSG00000261175	LINC02188	lncRNA	red	0.272204	0.178535	0.678806	0.000137701	0.102702	0.617605	0.00271401	0.989502	0.118474	0.564327
ENSG00000174567	GOLT1A	protein_coding	red	0.270816	0.180849	0.7441	1.31451e-05	0.0467533	0.820583	0.0358434	0.861997	-0.005738	0.977806
ENSG00000143153	ATP1B1	protein_coding	red	0.269201	0.183564	0.358172	0.0723912	-0.0159423	0.938387	0.492076	0.0106659	-0.0569181	0.782413
ENSG00000181790	ADGRB1	protein_coding	red	0.268066	0.18549	0.629032	0.000576905	0.155323	0.448655	0.135017	0.510785	-0.0932381	0.650527
ENSG00000123836	PFKFB2	protein_coding	red	0.267931	0.185721	0.744156	1.31148e-05	-0.0501518	0.807772	0.198947	0.329893	-0.147821	0.471126
ENSG00000244050	DEFB109F	transcribed_unprocessed_pseudogene	red	0.267656	0.18619	0.44638	0.0222614	0.0474709	0.817874	0.0640039	0.756086	0.0113164	0.956245
ENSG00000062370	ZNF112	protein_coding	red	0.265092	0.190605	0.327132	0.102836	0.348027	0.0814628	-0.248494	0.220925	0.0994034	0.629002
ENSG00000064199	SPA17	protein_coding	red	0.26252	0.195104	0.687516	0.000104199	0.14667	0.474627	-0.0238824	0.907808	0.0813208	0.692903
ENSG00000152128	TMEM163	protein_coding	red	0.26083	0.1981	0.732323	2.10871e-05	-0.0509505	0.804768	-0.0639388	0.756326	-0.142332	0.487931
ENSG00000126464	PRR12	protein_coding	red	0.260545	0.198609	0.471078	0.0151361	0.172422	0.399632	-0.0351235	0.864743	0.0387359	0.850977
ENSG00000275993	CU639417.1	protein_coding	red	0.25957	0.200355	0.617383	0.000779244	-0.0265222	0.897668	0.0393431	0.848668	-0.113871	0.579661
ENSG00000148468	FAM171A1	protein_coding	red	0.258027	0.20314	0.612407	0.000882885	0.291308	0.148776	-0.00356385	0.986215	-0.0237289	0.908398
ENSG00000091483	FH	protein_coding	red	0.257393	0.204291	0.713142	4.33218e-05	0.134794	0.511489	0.243683	0.230286	-0.18412	0.367911
ENSG00000236136	ADORA2BP1	processed_pseudogene	red	0.255737	0.207319	0.486258	0.0117771	0.336518	0.0927721	0.0797917	0.69841	-0.130108	0.526409
ENSG00000228126	FALEC	lncRNA	red	0.254987	0.208701	0.487178	0.0115953	0.16348	0.424882	0.012421	0.951979	0.0474639	0.8179
ENSG00000103978	TMEM87A	protein_coding	red	0.253032	0.212333	0.565241	0.00262135	0.164267	0.422626	0.311228	0.12171	-0.0659639	0.748849
ENSG00000136944	LMX1B	protein_coding	red	0.2513	0.215585	0.753364	8.90179e-06	0.119892	0.559639	0.0943497	0.646625	-0.133147	0.516709
ENSG00000104140	RHOV	protein_coding	red	0.251188	0.215796	0.549072	0.0036729	0.289483	0.151455	0.107948	0.599655	-0.0998131	0.627582
ENSG00000253537	PCDHGA7	protein_coding	red	0.25039	0.217308	0.795893	1.16656e-06	0.0281262	0.891514	0.0734694	0.721331	-0.0332981	0.871714
ENSG00000187957	DNER	protein_coding	red	0.249393	0.219205	0.703157	6.16426e-05	-0.0958973	0.641208	0.208695	0.306248	-0.0997691	0.627735
ENSG00000232739	AL607028.1	lncRNA	red	0.248949	0.220053	0.557851	0.00306465	0.199298	0.329024	-0.122993	0.549454	-0.102256	0.619142
ENSG00000189077	TMEM120A	protein_coding	red	0.245906	0.225929	0.38978	0.0490226	-0.0935341	0.649487	0.663371	0.000220792	-0.173629	0.396289
ENSG00000227671	AL390728.4	transcribed_unprocessed_pseudogene	red	0.243137	0.231365	0.681122	0.00012798	0.0103988	0.95979	0.0315109	0.878548	0.0902016	0.661231
ENSG00000232936	AL157400.2	lncRNA	red	0.242769	0.232094	0.575821	0.00208266	0.156863	0.444114	0.171037	0.403487	0.0226503	0.912546
ENSG00000133055	MYBPH	protein_coding	red	0.242725	0.232181	0.76998	4.23436e-06	0.00113048	0.995627	0.000189221	0.999268	-0.0722429	0.725806
ENSG00000221829	FANCG	protein_coding	red	0.231624	0.254896	0.364168	0.0674055	0.107765	0.600279	-0.13986	0.495595	0.0593601	0.773312
ENSG00000255920	AC006122.2	lncRNA	red	0.229074	0.260311	0.725225	2.77143e-05	0.0339142	0.86936	0.054944	0.78979	-0.0809681	0.694172
ENSG00000215186	GOLGA6B	protein_coding	red	0.228004	0.262606	0.75777	7.35173e-06	-0.0384674	0.851999	-0.0545089	0.791419	-0.0849859	0.679767
ENSG00000119283	TRIM67	protein_coding	red	0.227343	0.264029	0.577239	0.00201824	0.160136	0.434544	-0.00413091	0.984021	-0.0511889	0.803872
ENSG00000114541	FRMD4B	protein_coding	red	0.226569	0.265703	0.708572	5.10028e-05	0.198886	0.330044	-0.0956136	0.6422	-0.123489	0.547833
ENSG00000089091	DZANK1	protein_coding	red	0.223639	0.2721	0.504981	0.00850902	0.159997	0.434947	0.0739652	0.719525	0.168433	0.410789
ENSG00000171540	OTP	protein_coding	red	0.221509	0.276811	0.671974	0.000170274	0.154158	0.452107	0.288189	0.153375	-0.00718058	0.972228
ENSG00000259967	AC087761.1	lncRNA	red	0.21695	0.287071	0.67456	0.000157225	-0.0338489	0.86961	0.264941	0.190866	-0.186461	0.361747
ENSG00000149043	SYT8	protein_coding	red	0.216252	0.288663	0.775308	3.29361e-06	0.0606635	0.768465	-0.0151538	0.94143	-0.0717458	0.727622
ENSG00000115419	GLS	protein_coding	red	0.213587	0.29479	0.693848	8.45772e-05	0.0977836	0.63463	0.0342447	0.868098	-0.0682832	0.740312
ENSG00000250376	AC093720.1	unprocessed_pseudogene	red	0.211033	0.300738	0.820174	2.91872e-07	0.0257763	0.900531	0.0174224	0.932679	-0.106948	0.60306
ENSG00000237664	LINC00316	lncRNA	red	0.206279	0.312008	0.607929	0.000986169	0.231497	0.255165	-0.0936831	0.648964	-0.0239588	0.907514
ENSG00000267605	AC016590.1	lncRNA	red	0.205914	0.312883	0.771582	3.92904e-06	0.0415269	0.840371	-0.0125841	0.951349	-0.0996636	0.6281
ENSG00000137869	CYP19A1	protein_coding	red	0.205011	0.315058	0.64447	0.000380029	0.019339	0.925293	-0.00264637	0.989763	-0.0699971	0.734022
ENSG00000231940	RPS7P3	processed_pseudogene	red	0.204612	0.316021	0.457051	0.0189062	-0.0727014	0.724132	-0.0785389	0.702932	0.186141	0.362585
ENSG00000270882	HIST2H4A	protein_coding	red	0.203078	0.319742	0.605397	0.00104905	0.0713044	0.729236	0.0705798	0.731888	0.0681951	0.740635
ENSG00000271550	BNIP3P11	processed_pseudogene	red	0.201037	0.324733	0.572026	0.0022638	-0.216522	0.288044	0.210276	0.302515	-0.0351937	0.864475
ENSG00000095015	MAP3K1	protein_coding	red	0.199162	0.32936	0.475113	0.0141747	0.209108	0.305271	0.115472	0.574307	0.0935239	0.649523
ENSG00000137845	ADAM10	protein_coding	red	0.198172	0.331819	0.641897	0.000408054	0.194044	0.342193	-0.102572	0.618054	0.0611696	0.766586
ENSG00000104879	CKM	protein_coding	red	0.196638	0.33565	0.668924	0.000186879	0.0662405	0.747829	-0.0541182	0.792882	-0.11566	0.573679
ENSG00000196517	SLC6A9	protein_coding	red	-0.196054	0.337118	-0.369181	0.0634441	0.172646	0.399011	0.10597	0.606398	-0.0813538	0.692784
ENSG00000267346	EIF5AP3	processed_pseudogene	red	0.192877	0.345159	0.652426	0.000303737	-0.0661341	0.748221	0.098534	0.63202	-0.0508581	0.805116
ENSG00000152127	MGAT5	protein_coding	red	0.188032	0.357643	0.660288	0.000241857	-0.0741674	0.718789	0.0801543	0.697103	-0.183124	0.370554
ENSG00000120137	PANK3	protein_coding	red	0.185572	0.36408	0.518262	0.0066829	0.350069	0.0795714	0.00276738	0.989295	-0.024208	0.906556
ENSG00000140876	NUDT7	protein_coding	red	0.185526	0.364201	0.692849	8.74381e-05	-0.0400014	0.846165	0.0432214	0.833945	-0.052845	0.797654
ENSG00000132563	REEP2	protein_coding	red	0.182453	0.372341	0.576808	0.00203763	0.0511417	0.80405	-0.0983586	0.63263	0.125588	0.540993
ENSG00000243642	RN7SL526P	misc_RNA	red	0.18137	0.375233	0.80759	6.13094e-07	0.00534267	0.979335	-0.0836218	0.684646	-0.140861	0.492485
ENSG00000232434	C9orf172	protein_coding	red	0.173603	0.396361	0.675394	0.000153208	0.0798442	0.69822	0.0407146	0.843455	-0.0606905	0.768365
ENSG00000188338	SLC38A3	protein_coding	red	0.17322	0.397422	0.642635	0.00039984	-0.0586991	0.775772	-0.111172	0.588737	-0.0733016	0.721943
ENSG00000206685	RNU6-1189P	snRNA	red	0.16992	0.406609	0.657539	0.000262098	-0.0490409	0.811955	-0.0561092	0.785433	-0.0957534	0.641711
ENSG00000267677	AC016229.2	lncRNA	red	0.167077	0.414621	0.514349	0.00718302	-0.191113	0.349675	0.0403926	0.844679	-0.0450643	0.826967
ENSG00000249201	CTD-3080P12.3	lncRNA	red	0.165592	0.418842	0.6107	0.000921101	-0.0593724	0.773266	-0.0243998	0.905819	0.0313118	0.87931
ENSG00000239665	AL157392.3	lncRNA	red	0.1634	0.425111	0.458778	0.0184042	0.163457	0.424949	-0.194408	0.341269	0.0959159	0.641143
ENSG00000214465	SMARCE1P6	processed_pseudogene	red	0.159358	0.436809	0.547373	0.00380175	-0.214437	0.292826	-0.000827698	0.996798	-0.14465	0.480797
ENSG00000005700	IBTK	protein_coding	red	0.153896	0.452884	0.533031	0.00505068	-0.0196493	0.924098	0.139776	0.495856	-0.00447413	0.982694
ENSG00000232303	DFFBP1	processed_pseudogene	red	0.152849	0.456002	0.631532	0.000540004	0.044516	0.829041	0.046271	0.822405	-0.106265	0.605388
ENSG00000144749	LRIG1	protein_coding	red	0.148824	0.468088	0.559721	0.00294685	-0.064624	0.753794	-0.170563	0.40481	-0.234857	0.248138
ENSG00000148358	GPR107	protein_coding	red	0.148523	0.469001	0.538817	0.00451045	0.173014	0.397992	0.084413	0.681815	-0.109208	0.595378
ENSG00000215861	AC245297.1	unprocessed_pseudogene	red	0.147882	0.470941	0.566484	0.00255243	0.0134642	0.947951	0.00269733	0.989566	-0.0628732	0.76027
ENSG00000224727	FCF1P7	processed_pseudogene	red	0.147013	0.473582	0.455854	0.0192605	-0.00628281	0.9757	0.0293353	0.886879	-0.0935128	0.649562
ENSG00000229862	AL121972.2	lncRNA	red	0.142672	0.48688	0.429037	0.028735	0.00569436	0.977975	0.310017	0.123244	-0.109338	0.594936
ENSG00000145002	FAM86B2	protein_coding	red	0.132471	0.51886	0.648963	0.000335114	0.0132064	0.948946	0.0372406	0.856671	-0.0414071	0.840826
ENSG00000156017	CARNMT1	protein_coding	red	0.131699	0.52132	0.556369	0.00316083	-0.0212292	0.918014	0.00174704	0.993242	-0.294123	0.144712
ENSG00000261124	AC135050.4	lncRNA	red	0.125508	0.541255	0.435233	0.026268	-0.0455118	0.825274	-0.0671671	0.744416	0.0951105	0.64396
ENSG00000274798	AC025166.1	lncRNA	red	0.115751	0.573375	0.490408	0.0109751	0.401363	0.0421271	0.0777465	0.705797	-0.18987	0.352877
ENSG00000230849	GOT2P2	processed_pseudogene	red	0.0858987	0.67651	0.615184	0.000823668	-0.291404	0.148637	-0.0870223	0.672508	-0.266938	0.187419
ENSG00000265554	AP005271.1	lncRNA	red	0.0642212	0.755282	0.56024	0.00291482	0.0304586	0.882576	0.173267	0.397291	-0.0696088	0.735446
ENSG00000113209	PCDHB5	protein_coding	red	0.0600337	0.770806	0.377633	0.0571756	0.0339247	0.86932	-0.0150127	0.941974	0.0333034	0.871694
ENSG00000224969	AL645608.2	lncRNA	red	0.0580468	0.778202	0.484418	0.0121479	0.00831247	0.967853	0.0158543	0.938727	-0.0897893	0.662689
ENSG00000260420	LINC02182	lncRNA	red	0.0577413	0.779341	0.601399	0.00115543	-0.0819638	0.690592	-0.0427134	0.83587	-0.100671	0.624612
ENSG00000231927	AC093734.1	lncRNA	red	0.0551961	0.788847	0.455542	0.0193539	-0.0305684	0.882156	-0.0992964	0.629374	0.0929008	0.651713
ENSG00000176293	ZNF135	protein_coding	red	-0.0439442	0.831206	0.458949	0.0183552	-0.0740886	0.719076	-0.139331	0.497245	-0.174379	0.394222
ENSG00000234771	SLC25A25-AS1	lncRNA	red	-0.0332835	0.87177	0.468732	0.0157196	-0.115796	0.573227	-0.14879	0.468193	-0.0624018	0.762016
ENSG00000102900	NUP93	protein_coding	red	0.032485	0.874822	0.462584	0.0173365	-0.273281	0.176755	-0.170768	0.404239	-0.0812739	0.693072
ENSG00000267886	AC074135.1	lncRNA	red	-0.0279288	0.892271	0.497466	0.00971544	0.0778914	0.705273	-0.02311	0.910778	-0.136356	0.506562
ENSG00000215146	BX322639.1	transcribed_unprocessed_pseudogene	red	0.0151627	0.941395	0.471626	0.0150026	0.119601	0.5606	-0.0533078	0.795918	-0.168217	0.411398
ENSG00000249430	NA	NA	red	-0.013214	0.948917	0.378286	0.0567121	0.0681145	0.740932	-0.0744868	0.717626	-0.0767784	0.709304
ENSG00000153404	PLEKHG4B	protein_coding	red	-0.00627364	0.975735	0.467315	0.0160807	0.0300616	0.884096	-0.0870479	0.672417	-0.0903292	0.66078

## Sheet: CHOL_T
geneId	geneSymbol	geneBiotype	moduleColor	GS.stage_tnm_T	p.GS.stage_tnm_T	MM.cyan	p.MM.cyan	MM.royalblue	p.MM.royalblue	MM.orange	p.MM.orange	MM.green	p.MM.green
ENSG00000163071	SPATA18	protein_coding	green	0.579337	0.00192609	-0.0332588	0.871864	0.00924534	0.964247	0.426016	0.0300039	0.704875	5.8073e-05
ENSG00000157470	FAM81A	protein_coding	green	0.540739	0.00434222	0.162282	0.428328	0.318191	0.113158	-0.0210529	0.918693	0.864549	1.23971e-08
ENSG00000271547	AC117498.3	processed_pseudogene	green	0.53045	0.00530876	0.212147	0.298133	0.151509	0.460008	0.102168	0.619443	0.742114	1.42606e-05
ENSG00000110851	PRDM4	protein_coding	green	0.521013	0.00634923	0.130931	0.523775	0.344149	0.0851502	0.00101996	0.996054	0.740792	1.50489e-05
ENSG00000279205	AC092162.3	TEC	green	0.516157	0.00694815	0.423384	0.0311457	0.41576	0.0346517	-0.0866681	0.673768	0.705104	5.76104e-05
ENSG00000173838	MARCH10	protein_coding	green	0.511706	0.00753827	0.105051	0.609539	0.420602	0.0323905	0.301005	0.135111	0.690796	9.35848e-05
ENSG00000205336	ADGRG1	protein_coding	green	0.509288	0.007876	-0.000842549	0.996741	0.224765	0.26963	0.411459	0.036764	0.634921	0.000493277
ENSG00000204941	PSG5	protein_coding	green	0.507249	0.00817055	-0.0553803	0.788158	0.0676533	0.742627	0.475159	0.014164	0.757308	7.50225e-06
ENSG00000240370	RPL13P5	transcribed_processed_pseudogene	green	0.496168	0.0099376	0.101723	0.620979	0.406805	0.0391641	0.546059	0.00390401	0.579087	0.00193684
ENSG00000234405	Z69733.1	lncRNA	green	0.477679	0.0135896	0.396183	0.0451093	0.526735	0.00569975	0.320603	0.110301	0.384808	0.0522418
ENSG00000150967	ABCB9	protein_coding	green	0.474731	0.0142634	-0.0230523	0.911	0.245481	0.226757	0.148269	0.46977	0.728395	2.45549e-05
ENSG00000152527	PLEKHH2	protein_coding	green	0.472322	0.0148341	0.174298	0.394445	0.233237	0.251509	0.114703	0.576876	0.889448	1.23795e-09
ENSG00000230894	AL133284.1	lncRNA	green	0.464276	0.0168785	0.0234414	0.909503	0.185477	0.36433	0.341863	0.087382	0.760431	6.53691e-06
ENSG00000152556	PFKM	protein_coding	green	0.463686	0.017037	0.158301	0.439895	0.352392	0.0774595	0.125379	0.541674	0.601749	0.00114576
ENSG00000219607	PPP1R3G	protein_coding	green	0.460885	0.0178068	-0.0212234	0.918036	0.192349	0.346507	0.330344	0.0993046	0.824701	2.20347e-07
ENSG00000106013	ANKRD7	protein_coding	green	0.460532	0.0179058	-0.0775021	0.706682	0.430104	0.0282977	0.154272	0.451768	0.769873	4.25551e-06
ENSG00000188211	NCR3LG1	protein_coding	green	0.456109	0.0191845	0.0481525	0.815303	0.0174366	0.932624	0.229749	0.258871	0.729648	2.33973e-05
ENSG00000157833	GAREM2	protein_coding	green	0.451162	0.0207023	0.00546635	0.978857	0.0490792	0.81181	0.231117	0.255968	0.764435	5.46213e-06
ENSG00000205309	NT5M	protein_coding	green	0.45094	0.0207728	0.133745	0.514809	0.0842658	0.682341	0.13433	0.512956	0.763108	5.79922e-06
ENSG00000261069	AC124312.3	lncRNA	green	0.450232	0.0209984	0.00520535	0.979866	0.265843	0.189304	0.245651	0.226425	0.653733	0.000292577
ENSG00000177679	SRRM3	protein_coding	green	0.448081	0.0216964	-0.11959	0.560635	0.134983	0.510892	-0.05986	0.771452	0.682918	0.000120858
ENSG00000154240	CEP112	protein_coding	green	0.447747	0.0218062	0.0371674	0.856949	0.34501	0.084321	0.360319	0.0705747	0.568306	0.00245426
ENSG00000204188	GGNBP1	transcribed_unitary_pseudogene	green	0.445689	0.0224942	0.0986312	0.631683	0.0752615	0.714809	0.0929864	0.651412	0.678413	0.000139414
ENSG00000086717	PPEF1	protein_coding	green	0.443667	0.0231874	0.0910942	0.658077	0.159074	0.437635	0.0247279	0.904558	0.78522	2.0262e-06
ENSG00000111412	C12orf49	protein_coding	green	0.44234	0.0236515	0.0681846	0.740674	0.575124	0.00211497	0.186422	0.361848	0.72372	2.93371e-05
ENSG00000237307	SRRM1P3	processed_pseudogene	green	0.436663	0.0257235	0.256213	0.206446	0.0458234	0.824096	0.22392	0.271481	0.825233	2.13076e-07
ENSG00000117148	ACTL8	protein_coding	green	0.436482	0.025792	0.116443	0.57107	-0.0510946	0.804227	-0.0743701	0.718051	0.773951	3.51351e-06
ENSG00000241634	AC069499.1	processed_pseudogene	green	0.434126	0.0266956	0.301789	0.134046	0.0877096	0.670064	-0.0648359	0.753011	0.849055	4.18166e-08
ENSG00000257647	AC124312.2	lncRNA	green	0.432831	0.0272032	0.0939706	0.647955	0.189538	0.353733	0.214425	0.292855	0.730584	2.25651e-05
ENSG00000225511	LINC00475	lncRNA	green	0.432593	0.0272973	-0.0766222	0.70987	0.122564	0.550858	0.521794	0.006257	0.592122	0.00143877
ENSG00000270919	AC108451.2	lncRNA	green	0.431826	0.0276023	0.399353	0.0432649	0.351419	0.0783388	-0.150811	0.462103	0.502306	0.00892334
ENSG00000163281	GNPDA2	protein_coding	green	0.428381	0.029007	0.294328	0.144419	0.398882	0.0435353	0.0555822	0.787403	0.463355	0.0171265
ENSG00000178568	ERBB4	protein_coding	green	0.42191	0.0318004	0.0516243	0.802236	0.131873	0.520765	-0.036153	0.860816	0.931048	5.34469e-12
ENSG00000249346	LINC01016	lncRNA	green	0.417394	0.0338747	0.162047	0.429006	0.0232999	0.910047	-0.0626721	0.761015	0.861231	1.62797e-08
ENSG00000197891	SLC22A12	protein_coding	green	0.415086	0.0349759	-0.0356081	0.862894	-0.103054	0.616395	-0.0813147	0.692925	0.74312	1.36852e-05
ENSG00000258777	HIF1A-AS1	lncRNA	green	0.411877	0.0365542	0.0391541	0.849387	0.18141	0.375128	0.156301	0.445767	0.838721	8.75025e-08
ENSG00000226711	FAM66C	lncRNA	green	0.411743	0.0366213	0.0943451	0.646642	0.104816	0.610344	0.207684	0.308651	0.503287	0.00876952
ENSG00000086570	FAT2	protein_coding	green	0.410874	0.0370594	0.117409	0.567857	0.193215	0.344299	0.150944	0.461703	0.897069	5.47125e-10
ENSG00000156535	CD109	protein_coding	green	0.410858	0.0370675	-0.0552498	0.788646	0.356945	0.0734456	0.0357672	0.862287	0.755745	8.03149e-06
ENSG00000236683	HMGA1P1	processed_pseudogene	green	0.409342	0.037841	0.106469	0.604693	0.00828836	0.967946	0.386779	0.0509465	0.554101	0.00331302
ENSG00000233532	LINC00460	lncRNA	green	0.409035	0.037999	-0.0398326	0.846807	0.0780555	0.70468	0.0408733	0.842852	0.975743	2.4211e-17
ENSG00000182389	CACNB4	protein_coding	green	0.40699	0.0390663	0.0439139	0.831321	0.107833	0.600047	0.00572108	0.977872	0.974609	4.16487e-17
ENSG00000235897	TM4SF19-AS1	lncRNA	green	0.406315	0.0394242	-0.0215007	0.916969	0.0881297	0.668572	0.117138	0.568757	0.959464	1.0557e-14
ENSG00000229886	AC068533.2	processed_pseudogene	green	0.405727	0.0397376	-0.0750862	0.715446	0.135129	0.510429	0.00649119	0.974894	0.780375	2.57723e-06
ENSG00000115226	FNDC4	protein_coding	green	0.405038	0.0401074	0.064753	0.753317	0.352672	0.0772076	0.419173	0.0330451	0.627148	0.000606137
ENSG00000267069	AP005264.1	lncRNA	green	0.404808	0.0402318	0.0142833	0.944789	0.139556	0.496541	0.0842512	0.682393	0.713589	4.26294e-05
ENSG00000130270	ATP8B3	protein_coding	green	0.402319	0.0415938	-0.0515651	0.802459	0.136381	0.506484	0.296124	0.141871	0.706665	5.45482e-05
ENSG00000227036	LINC00511	lncRNA	green	0.40122	0.0422068	0.072877	0.723492	0.49124	0.0108199	0.0148657	0.942541	0.47268	0.0147482
ENSG00000259732	AC092757.2	lncRNA	green	0.400063	0.04286	0.110465	0.591124	0.133225	0.516463	0.0471905	0.818932	0.935109	2.6351e-12
ENSG00000147697	GSDMC	protein_coding	green	0.398054	0.0440134	-0.0657581	0.749608	0.102869	0.617031	-0.0451274	0.826728	0.857406	2.21001e-08
ENSG00000062485	CS	protein_coding	green	0.397472	0.0443518	0.00642513	0.975149	0.356333	0.0739756	-0.0719374	0.726922	0.839618	8.22404e-08
ENSG00000176933	TOB2P1	processed_pseudogene	green	0.39741	0.044388	0.0025148	0.990272	0.294992	0.143474	0.174879	0.392845	0.84876	4.2738e-08
ENSG00000115919	KYNU	protein_coding	green	0.396677	0.0448178	0.14892	0.467799	0.11054	0.590868	0.619797	0.000732896	0.610468	0.000926384
ENSG00000121903	ZSCAN20	protein_coding	green	0.394983	0.0458233	0.0232155	0.910372	0.15767	0.441742	0.0234914	0.909311	0.775876	3.20537e-06
ENSG00000253671	AC027117.1	lncRNA	green	0.392304	0.0474491	0.0644179	0.754555	0.178768	0.382238	0.0352068	0.864425	0.930594	5.76882e-12
ENSG00000228510	AL359091.1	processed_pseudogene	green	0.39202	0.0476246	0.370144	0.0627045	0.245499	0.226721	-0.14846	0.46919	0.622948	0.000675986
ENSG00000183929	DUSP5P1	processed_pseudogene	green	0.39051	0.0485633	0.0570064	0.782083	0.0472627	0.81866	-0.00129771	0.99498	0.753778	8.74496e-06
ENSG00000268521	VN1R83P	unprocessed_pseudogene	green	0.389956	0.0489116	0.214728	0.292157	0.372504	0.060919	-0.0172096	0.9335	0.744654	1.28483e-05
ENSG00000116830	TTF2	protein_coding	green	0.387998	0.0501582	0.217946	0.284808	0.12334	0.54832	0.154901	0.449903	0.450406	0.0209429
ENSG00000203724	C1orf53	protein_coding	green	0.387782	0.0502971	0.172736	0.398761	0.370677	0.0622976	0.0373208	0.856365	0.672823	0.00016589
ENSG00000172927	MYEOV	protein_coding	green	0.386339	0.0512331	0.121323	0.554929	0.429137	0.0286938	0.193664	0.343156	0.431885	0.027579
ENSG00000247809	NR2F2-AS1	lncRNA	green	0.385555	0.0517479	0.272481	0.178077	0.141388	0.49085	0.258616	0.202073	0.481777	0.0126971
ENSG00000072840	EVC	protein_coding	green	0.384588	0.0523877	0.149217	0.466903	0.357699	0.072796	0.18695	0.360465	0.710971	4.68323e-05
ENSG00000237686	AL109615.3	lncRNA	green	0.383632	0.0530265	0.0988963	0.630762	0.227205	0.264328	0.342197	0.0870532	0.399275	0.0433098
ENSG00000241770	AC104411.1	lncRNA	green	0.383289	0.0532574	0.269855	0.182462	-0.0398329	0.846805	-0.10883	0.596661	0.639976	0.00043013
ENSG00000223392	CLDN10-AS1	lncRNA	green	0.382762	0.053613	0.468648	0.0157407	0.0502885	0.807258	0.140263	0.494343	0.609892	0.000939663
ENSG00000137090	DMRT1	protein_coding	green	0.37934	0.0559698	-0.0159269	0.938447	0.0960637	0.640627	-0.0281923	0.89126	0.977813	8.38991e-18
ENSG00000182379	NXPH4	protein_coding	green	0.377975	0.0569322	-0.0593135	0.773485	0.0504738	0.806561	-0.0863529	0.674891	0.729733	2.33207e-05
ENSG00000152592	DMP1	protein_coding	green	0.376406	0.0580544	0.00259002	0.989981	0.0980051	0.633859	-0.0207708	0.919779	0.968001	6.46106e-16
ENSG00000128487	SPECC1	protein_coding	green	0.376234	0.0581783	-0.0168813	0.934766	0.371194	0.061905	0.175458	0.391255	0.855994	2.46839e-08
ENSG00000139178	C1RL	protein_coding	green	0.376044	0.0583158	0.00706197	0.972687	0.57661	0.00204661	0.356322	0.0739852	0.38013	0.0554186
ENSG00000144550	CPNE9	protein_coding	green	0.374164	0.0596871	0.134789	0.511506	0.0227475	0.912172	0.198948	0.32989	0.623777	0.000661681
ENSG00000223949	ROR1-AS1	lncRNA	green	0.37392	0.059867	-0.027788	0.892811	0.0709918	0.73038	-0.0228694	0.911703	0.967665	7.31176e-16
ENSG00000186073	C15orf41	protein_coding	green	0.373425	0.0602336	0.00175129	0.993226	0.197715	0.332958	0.0245854	0.905106	0.940319	9.91647e-13
ENSG00000261143	ADAMTS7P3	transcribed_unprocessed_pseudogene	green	0.369711	0.0630363	0.259916	0.199735	0.000123308	0.999523	-0.0996432	0.628171	0.452925	0.0201507
ENSG00000238283	TBC1D3P1	transcribed_unprocessed_pseudogene	green	0.368023	0.0643434	-0.0341681	0.868391	0.0724993	0.72487	-0.0342289	0.868158	0.968475	5.41463e-16
ENSG00000248685	LINC02484	lncRNA	green	0.367355	0.0648658	-0.0859321	0.676391	0.0258185	0.900369	-0.0849071	0.680049	0.83168	1.40608e-07
ENSG00000260634	AC012508.2	lncRNA	green	0.365114	0.0666445	-0.065483	0.750622	-0.0432036	0.834012	0.249012	0.219933	0.830454	1.52374e-07
ENSG00000225791	TRAM2-AS1	lncRNA	green	0.362419	0.0688318	0.0170869	0.933973	0.0873262	0.671427	0.00528577	0.979555	0.64188	0.000408245
ENSG00000072832	CRMP1	protein_coding	green	0.36077	0.0701972	0.154774	0.450278	0.212446	0.297438	0.264269	0.192036	0.780557	2.55431e-06
ENSG00000158578	ALAS2	protein_coding	green	0.358136	0.0724217	-0.0669672	0.745152	0.0750486	0.715583	0.511539	0.00756115	0.535024	0.00485877
ENSG00000111716	LDHB	protein_coding	green	0.356332	0.0739762	0.0797921	0.698408	0.117832	0.566454	0.00276444	0.989307	0.816034	3.74891e-07
ENSG00000205794	AC098591.1	transcribed_processed_pseudogene	green	0.355176	0.0749858	0.110512	0.590965	0.299002	0.137856	-0.110365	0.591459	0.638262	0.000450709
ENSG00000135253	KCP	protein_coding	green	0.351091	0.0786367	0.154686	0.45054	0.00252161	0.990246	0.252189	0.21391	0.737915	1.69003e-05
ENSG00000060138	YBX3	protein_coding	green	0.350758	0.0789402	-0.0486414	0.81346	0.50982	0.00780057	0.147562	0.471913	0.413218	0.0358882
ENSG00000161249	DMKN	protein_coding	green	0.347663	0.081804	-0.0336256	0.870462	0.140757	0.492806	0.0289311	0.888428	0.89815	4.84797e-10
ENSG00000008394	MGST1	protein_coding	green	0.347312	0.0821338	0.293629	0.145419	0.0846666	0.680908	0.247647	0.222554	0.576156	0.00206729
ENSG00000214510	SPINK13	protein_coding	green	0.347309	0.0821363	-0.0362869	0.860305	0.0732153	0.722258	-0.0387509	0.85092	0.976147	1.98348e-17
ENSG00000116176	TPSG1	protein_coding	green	0.345604	0.0837526	0.3752	0.0589284	0.0339485	0.869229	-0.0845066	0.68148	0.668567	0.000188912
ENSG00000240625	RN7SL403P	misc_RNA	green	0.345532	0.0838206	0.0275039	0.8939	0.113139	0.582116	0.0870922	0.672259	0.668116	0.000191512
ENSG00000188372	ZP3	protein_coding	green	0.345021	0.0843103	0.36775	0.0645562	0.0688762	0.738134	-0.0474407	0.817988	0.705588	5.66444e-05
ENSG00000147408	CSGALNACT1	protein_coding	green	0.344773	0.0845486	0.0711494	0.729803	0.310952	0.122059	0.101332	0.622328	0.811346	4.94081e-07
ENSG00000248757	LINC02115	lncRNA	green	0.342207	0.0870433	-0.0267321	0.896862	0.0590487	0.77447	0.10032	0.625827	0.93085	5.52523e-12
ENSG00000204052	LRRC73	protein_coding	green	0.341332	0.0879069	-0.09591	0.641164	-0.00605912	0.976565	-0.102442	0.618498	0.588884	0.00155083
ENSG00000107518	ATRNL1	protein_coding	green	0.339794	0.0894395	-0.042948	0.834981	0.0762864	0.711088	0.0537202	0.794373	0.883867	2.16983e-09
ENSG00000204283	LINC01973	lncRNA	green	0.339325	0.0899113	0.105523	0.607926	0.217118	0.286688	-0.0780994	0.704521	0.795443	1.19477e-06
ENSG00000274150	FADS2P1	unprocessed_pseudogene	green	0.339064	0.0901741	-0.0461517	0.822855	0.0686319	0.739031	-0.0303553	0.882971	0.952073	7.58326e-14
ENSG00000182752	PAPPA	protein_coding	green	0.33792	0.0913349	-0.132387	0.519128	0.0778754	0.705331	0.0375289	0.855572	0.645556	0.000368716
ENSG00000075391	RASAL2	protein_coding	green	0.337057	0.0922168	0.133362	0.516027	0.376074	0.058294	0.147504	0.472089	0.705553	5.67153e-05
ENSG00000262172	AC116025.2	lncRNA	green	0.336534	0.0927557	-0.106192	0.605641	-0.042715	0.835864	0.308745	0.124872	0.587921	0.00158559
ENSG00000226539	AC012512.1	processed_pseudogene	green	0.336034	0.0932722	-0.0738468	0.719956	0.00994512	0.961543	-0.0607517	0.768138	0.844387	5.87559e-08
ENSG00000224081	SLC44A3-AS1	transcribed_processed_pseudogene	green	0.335433	0.0938961	0.226911	0.264963	0.107934	0.599703	-0.0808438	0.694619	0.742888	1.38162e-05
ENSG00000136425	CIB2	protein_coding	green	0.334538	0.0948303	-0.0195912	0.924321	0.325265	0.10493	0.0389359	0.850217	0.612209	0.000887245
ENSG00000196502	SULT1A1	protein_coding	green	0.325042	0.105184	-0.0279645	0.892134	0.0196383	0.92414	0.473368	0.0145842	0.616996	0.000786914
ENSG00000146166	LGSN	protein_coding	green	0.317877	0.113534	-0.0725815	0.72457	0.00415903	0.983913	-0.0785593	0.702858	0.927653	9.34633e-12
ENSG00000266750	MIR4645	miRNA	green	0.317305	0.11422	-0.0345976	0.866751	0.0260492	0.899483	0.227237	0.264258	0.745638	1.23352e-05
ENSG00000226926	PDZPH1P	transcribed_unitary_pseudogene	green	0.316632	0.115033	-0.0760083	0.712097	0.033048	0.87267	-0.0207961	0.919681	0.949513	1.3973e-13
ENSG00000105409	ATP1A3	protein_coding	green	0.315454	0.116465	-0.0818832	0.690882	0.0141486	0.945309	-0.090858	0.658911	0.864754	1.21872e-08
ENSG00000235314	LINC00957	lncRNA	green	0.312815	0.11972	-0.027725	0.893052	0.0380057	0.853757	0.0195851	0.924345	0.650382	0.000321927
ENSG00000104213	PDGFRL	protein_coding	green	0.312637	0.119942	-0.0576393	0.779722	0.305425	0.129191	-0.0698861	0.734429	0.672029	0.000169989
ENSG00000260088	AL445483.1	lncRNA	green	0.312393	0.120247	0.00306035	0.988162	-0.0104902	0.959437	-0.104517	0.611368	0.774276	3.4597e-06
ENSG00000272396	AC005392.3	lncRNA	green	0.312373	0.120272	-0.0652216	0.751587	0.0115966	0.955163	0.0891604	0.664916	0.819589	3.02499e-07
ENSG00000272899	AC025594.2	protein_coding	green	0.312	0.12074	0.133362	0.516027	-0.119517	0.560879	0.128419	0.531837	0.708068	5.19185e-05
ENSG00000001626	CFTR	protein_coding	green	0.311431	0.121454	-0.0986455	0.631633	0.329054	0.100712	0.0132632	0.948727	0.803491	7.71842e-07
ENSG00000139800	ZIC5	protein_coding	green	0.309313	0.124143	0.0326617	0.874147	-0.0800235	0.697574	0.0338401	0.869643	0.495634	0.0100303
ENSG00000035862	TIMP2	protein_coding	green	0.308498	0.12519	-0.0492483	0.811174	0.288017	0.153632	0.271781	0.179238	0.623575	0.000665134
ENSG00000270246	NA	NA	green	0.306392	0.127922	0.0759129	0.712443	0.287478	0.154439	0.223658	0.272059	0.519954	0.00647596
ENSG00000228445	UGT1A2P	unprocessed_pseudogene	green	0.305737	0.128781	0.358833	0.071828	-0.00806533	0.968808	0.187929	0.357909	0.486147	0.0117993
ENSG00000243137	PSG4	protein_coding	green	0.305162	0.129539	-0.0731261	0.722583	0.0900469	0.661778	-0.0266803	0.897061	0.914756	6.25372e-11
ENSG00000244515	KRT18P34	processed_pseudogene	green	0.304995	0.129759	0.118058	0.565706	-0.0649699	0.752516	-0.117128	0.568792	0.681792	0.000125282
ENSG00000158813	EDA	protein_coding	green	0.301889	0.13391	-0.199225	0.329203	0.160853	0.432461	0.194695	0.340544	0.427501	0.0293746
ENSG00000115041	KCNIP3	protein_coding	green	0.300701	0.135524	0.207775	0.308434	0.0210506	0.918701	-0.10817	0.5989	0.607686	0.000992054
ENSG00000147614	ATP6V0D2	protein_coding	green	0.297025	0.140606	-0.0839912	0.683324	0.0592861	0.773587	-0.0481317	0.815382	0.942983	5.81321e-13
ENSG00000260196	AC124798.1	lncRNA	green	0.294925	0.143569	-0.0584006	0.776884	-0.166422	0.416479	0.241108	0.235403	0.563012	0.00274888
ENSG00000147509	RGS20	protein_coding	green	0.294718	0.143863	-0.137655	0.502482	0.00713367	0.97241	0.0280397	0.891845	0.889808	1.19266e-09
ENSG00000131473	ACLY	protein_coding	green	0.293873	0.14507	0.135666	0.508735	0.174982	0.392564	0.193994	0.342319	0.608883	0.000963317
ENSG00000229020	AKR7A2P1	processed_pseudogene	green	0.293569	0.145506	-0.0474744	0.817861	0.084872	0.680174	-0.0796693	0.698851	0.550552	0.00356368
ENSG00000143369	ECM1	protein_coding	green	0.293567	0.145508	0.0101696	0.960676	0.0915484	0.656475	0.0362947	0.860276	0.688735	0.000100138
ENSG00000197106	SLC6A17	protein_coding	green	0.293278	0.145924	-0.114015	0.579178	-0.0105224	0.959312	-0.0991116	0.630015	0.687822	0.000103165
ENSG00000182199	SHMT2	protein_coding	green	0.292843	0.14655	-0.0716986	0.727795	0.101044	0.623323	0.123716	0.547091	0.803562	7.68795e-07
ENSG00000169515	CCDC8	protein_coding	green	0.289907	0.15083	-0.141935	0.489158	0.0464845	0.821598	-0.0838638	0.68378	0.585587	0.00167259
ENSG00000137404	NRM	protein_coding	green	0.289024	0.152134	-0.0196078	0.924257	0.272982	0.177249	0.171504	0.402183	0.739455	1.58856e-05
ENSG00000142959	BEST4	protein_coding	green	0.286772	0.155498	-0.0646055	0.753862	-0.255381	0.207975	0.199287	0.329049	0.372963	0.0605766
ENSG00000257151	PWAR6	lncRNA	green	0.282839	0.161498	0.0800529	0.697468	0.0876451	0.670293	0.238273	0.241123	0.567984	0.00247135
ENSG00000168779	SHOX2	protein_coding	green	0.282223	0.162451	0.11169	0.586989	0.0451205	0.826754	-0.149443	0.46622	0.809797	5.40398e-07
ENSG00000224078	SNHG14	lncRNA	green	0.278311	0.168605	0.0363474	0.860075	0.138946	0.498444	0.348019	0.0814703	0.467873	0.0159376
ENSG00000169435	RASSF6	protein_coding	green	0.278214	0.16876	-0.0402869	0.84508	0.101305	0.622421	-0.0309472	0.880705	0.700599	6.73194e-05
ENSG00000237223	SULT1C2P1	transcribed_unprocessed_pseudogene	green	0.275905	0.17247	-0.0781596	0.704303	-0.0315779	0.878292	-0.0199682	0.922869	0.868021	9.24941e-09
ENSG00000230438	SERPINB9P1	lncRNA	green	0.275754	0.172715	0.0396742	0.847409	0.0121326	0.953092	0.261827	0.19633	0.637961	0.000454407
ENSG00000044090	CUL7	protein_coding	green	0.275726	0.17276	0.143873	0.483183	0.033937	0.869273	0.171819	0.401308	0.700629	6.72499e-05
ENSG00000177138	FAM9B	protein_coding	green	0.274927	0.174058	-0.0824998	0.688668	-0.00559713	0.978351	-0.044016	0.830934	0.914993	6.05604e-11
ENSG00000277144	AC092757.3	lncRNA	green	0.272477	0.178084	0.147056	0.473452	0.0763079	0.71101	0.210931	0.300978	0.646061	0.000363557
ENSG00000172476	RAB40A	protein_coding	green	0.272246	0.178466	0.236223	0.245317	0.638817	0.00044395	0.31881	0.112419	0.389629	0.049118
ENSG00000248593	DSTNP2	transcribed_unprocessed_pseudogene	green	0.268321	0.185057	-0.0255913	0.901242	0.200716	0.325521	0.483065	0.0124268	0.430203	0.028257
ENSG00000050344	NFE2L3	protein_coding	green	0.267989	0.185622	0.104255	0.612268	0.421053	0.0321861	-0.141621	0.490129	0.493643	0.0103819
ENSG00000275703	U47924.3	lncRNA	green	0.267613	0.186264	0.199915	0.327498	0.095602	0.642241	0.182032	0.373463	0.636823	0.000468635
ENSG00000146005	PSD2	protein_coding	green	0.26489	0.190955	0.0232654	0.91018	-0.154625	0.450721	-0.0661583	0.748132	0.699281	7.04211e-05
ENSG00000234215	AC006012.1	lncRNA	green	0.262033	0.195965	-0.00103007	0.996015	0.0758981	0.712497	-0.0985348	0.632018	0.912464	8.49504e-11
ENSG00000226756	AC007365.1	lncRNA	green	0.260378	0.198907	-0.0870368	0.672456	0.186297	0.362176	0.210351	0.302339	0.683059	0.000120315
ENSG00000107551	RASSF4	protein_coding	green	0.257011	0.204986	0.0700147	0.733958	0.192511	0.346094	-0.0927582	0.652214	0.68678	0.00010672
ENSG00000279858	AC068880.4	TEC	green	0.255756	0.207285	0.117638	0.567097	0.0320596	0.876449	0.0205034	0.920808	0.690182	9.54956e-05
ENSG00000137171	KLC4	protein_coding	green	0.249542	0.218921	0.0922344	0.654058	-0.183522	0.369498	0.159116	0.437515	0.548264	0.00373367
ENSG00000239670	AL355864.2	unprocessed_pseudogene	green	0.246132	0.225488	0.13809	0.501119	-0.0524784	0.799029	-0.0628882	0.760214	0.706445	5.49705e-05
ENSG00000183171	BX322650.1	processed_pseudogene	green	0.244811	0.228069	-0.0191975	0.925838	-0.0524299	0.799212	0.0518186	0.801507	0.789252	1.65083e-06
ENSG00000102034	ELF4	protein_coding	green	0.23952	0.238596	-0.0627849	0.760597	0.220177	0.279784	0.00166551	0.993557	0.590292	0.00150122
ENSG00000165996	HACD1	protein_coding	green	0.238152	0.241369	-0.191075	0.349772	-0.0209987	0.918901	-0.0877893	0.669781	0.820972	2.77917e-07
ENSG00000270773	AC137695.2	processed_pseudogene	green	0.236403	0.244946	0.12064	0.557174	0.400527	0.0425974	-0.114864	0.576337	0.653544	0.000294163
ENSG00000136999	NOV	protein_coding	green	0.23221	0.253662	-0.0314772	0.878677	0.259404	0.200653	-0.059524	0.772702	0.79481	1.23556e-06
ENSG00000007062	PROM1	protein_coding	green	0.23041	0.257465	0.0614271	0.765631	0.282313	0.162312	-0.0577715	0.779229	0.726368	2.65358e-05
ENSG00000225062	CATIP-AS1	lncRNA	green	0.230114	0.258094	-0.0861215	0.675715	0.063283	0.758752	0.047241	0.818742	0.797881	1.04879e-06
ENSG00000175711	B3GNTL1	protein_coding	green	0.227589	0.2635	0.264113	0.192308	0.154285	0.45173	-0.0324838	0.874827	0.660677	0.000239105
ENSG00000239377	AC073111.1	lncRNA	green	0.226255	0.266384	0.0904309	0.66042	0.263534	0.193322	0.115472	0.574307	0.600789	0.00117246
ENSG00000182636	NDN	protein_coding	green	0.226184	0.266538	-0.0511687	0.803948	0.343266	0.0860067	-0.0535746	0.794919	0.415374	0.0348372
ENSG00000180044	C3orf80	protein_coding	green	0.22409	0.271109	-0.0642384	0.755219	0.314544	0.11758	0.181915	0.373777	0.609382	0.000951559
ENSG00000124523	SIRT5	protein_coding	green	0.221152	0.277605	0.026926	0.896118	0.19734	0.333893	-0.0417086	0.839681	0.681311	0.000127212
ENSG00000176595	KBTBD11	protein_coding	green	0.220945	0.278069	0.0278995	0.892383	-0.0704087	0.732514	-0.156091	0.446387	0.871876	6.61639e-09
ENSG00000167363	FN3K	protein_coding	green	0.218814	0.282848	-0.000280275	0.998916	-0.110507	0.59098	-0.0176428	0.93183	0.781719	2.41227e-06
ENSG00000002079	MYH16	transcribed_unitary_pseudogene	green	0.217241	0.286409	-0.107129	0.602444	0.0767987	0.70923	0.144714	0.480602	0.611606	0.000900645
ENSG00000115295	CLIP4	protein_coding	green	0.216917	0.287146	-0.0772003	0.707775	0.173887	0.395576	0.173713	0.396059	0.758782	7.03181e-06
ENSG00000275529	SNORD116-4	snoRNA	green	0.215312	0.290814	-0.0542816	0.79227	0.10752	0.60111	0.306499	0.127782	0.45475	0.0195922
ENSG00000127948	POR	protein_coding	green	0.214736	0.292137	-0.181228	0.375613	-0.0147662	0.942925	-0.251688	0.214852	0.742397	1.40964e-05
ENSG00000130821	SLC6A8	protein_coding	green	0.211808	0.298924	-0.00188779	0.992698	-0.198548	0.330883	-0.127273	0.535536	0.667183	0.000196984
ENSG00000228271	LINC02048	lncRNA	green	0.210448	0.30211	-0.0197815	0.923588	-0.0604907	0.769108	0.0911738	0.657796	0.649213	0.000332754
ENSG00000157827	FMNL2	protein_coding	green	0.209919	0.303355	-0.0556448	0.787169	0.0521581	0.800232	0.0653797	0.751003	0.762856	5.86534e-06
ENSG00000146904	EPHA1	protein_coding	green	-0.209813	0.303604	0.113602	0.580563	-0.246388	0.224991	-0.421898	0.0318058	-0.440577	0.02428
ENSG00000112208	BAG2	protein_coding	green	0.209441	0.304484	-0.0375329	0.855557	-0.0216575	0.916366	-0.0263453	0.898347	0.771239	3.99264e-06
ENSG00000182952	HMGN4	protein_coding	green	0.207483	0.309128	0.179735	0.379625	0.254824	0.209003	0.11943	0.561166	0.6092	0.000955848
ENSG00000108639	SYNGR2	protein_coding	green	-0.206497	0.311485	-0.212332	0.297702	-0.106249	0.605445	-0.254397	0.209792	0.62529	0.00063622
ENSG00000243678	NME2	protein_coding	green	-0.204709	0.315786	-0.218164	0.284316	-0.147825	0.471116	-0.102329	0.618889	0.513298	0.00732259
ENSG00000110063	DCPS	protein_coding	green	0.203219	0.319399	0.168033	0.411919	0.0923642	0.653601	-0.116538	0.570752	0.71846	3.56885e-05
ENSG00000131711	MAP1B	protein_coding	green	0.19916	0.329364	-0.0876887	0.670138	0.134145	0.513544	-0.0788717	0.70173	0.586997	0.00161955
ENSG00000257062	AC022335.1	protein_coding	green	0.195439	0.338664	0.17477	0.393145	0.00724857	0.971966	0.0472524	0.818699	0.576169	0.00206666
ENSG00000169710	FASN	protein_coding	green	0.19518	0.339319	0.155348	0.44858	-0.103753	0.61399	0.0588967	0.775036	0.544659	0.00401549
ENSG00000131944	FAAP24	protein_coding	green	0.193576	0.34338	-0.119761	0.560073	0.00699004	0.972965	-0.000632769	0.997552	0.519237	0.00656308
ENSG00000029559	IBSP	protein_coding	green	0.192328	0.346561	-0.0299203	0.884638	0.0400912	0.845824	-0.0480803	0.815575	0.695626	7.9691e-05
ENSG00000163576	EFHB	protein_coding	green	0.185138	0.365224	-0.0982979	0.632841	0.0350701	0.864947	0.00693509	0.973178	0.759411	6.83916e-06
ENSG00000250282	AC002401.2	lncRNA	green	0.183983	0.368274	-0.0615449	0.765193	-0.164947	0.42068	-0.0403854	0.844706	0.584642	0.00170896
ENSG00000146267	FAXC	protein_coding	green	0.183362	0.369921	0.138808	0.498875	0.29711	0.140486	0.163785	0.424006	0.561124	0.00286098
ENSG00000237974	AC000111.2	processed_pseudogene	green	0.183089	0.370646	-0.0955718	0.642346	0.0212092	0.918091	-0.0545502	0.791264	0.635642	0.000483808
ENSG00000199836	RNU1-47P	snRNA	green	0.182596	0.371961	-0.139252	0.497491	0.19833	0.331426	-0.0555593	0.787489	0.808592	5.79064e-07
ENSG00000113249	HAVCR1	protein_coding	green	0.181955	0.37367	-0.0754635	0.714075	0.0708291	0.730975	-0.0128966	0.950142	0.823229	2.41646e-07
ENSG00000241962	AC079447.1	protein_coding	green	0.180789	0.37679	0.13571	0.508597	-0.0874434	0.67101	-0.0251962	0.902759	0.710419	4.77642e-05
ENSG00000204933	CD177P1	unprocessed_pseudogene	green	0.179175	0.381138	-0.116029	0.572447	0.00403129	0.984407	0.122866	0.549867	0.759389	6.84567e-06
ENSG00000270822	AC092032.1	processed_pseudogene	green	0.1791	0.38134	-0.236147	0.245472	0.146313	0.475713	-0.141538	0.490386	0.528345	0.00552745
ENSG00000167766	ZNF83	protein_coding	green	0.177145	0.386644	0.167241	0.414158	-0.00951713	0.963197	-0.0243303	0.906086	0.616133	0.000804244
ENSG00000116883	AL591845.1	lncRNA	green	0.173758	0.395935	0.0478094	0.816597	-0.0982826	0.632894	-0.0373686	0.856183	0.584264	0.00172369
ENSG00000260657	AC107871.2	lncRNA	green	0.172106	0.400509	0.0341452	0.868478	0.0520589	0.800604	-0.109122	0.595671	0.699612	6.96296e-05
ENSG00000106526	ACTR3C	protein_coding	green	0.169903	0.406657	-0.119236	0.561805	0.106905	0.603205	0.0154497	0.940288	0.664901	0.000210947
ENSG00000251161	AC020661.1	lncRNA	green	0.16808	0.411786	0.201576	0.323409	-0.0708891	0.730755	0.0739818	0.719464	0.461291	0.0176934
ENSG00000224812	TMEM72-AS1	lncRNA	green	0.167884	0.412338	0.119588	0.560643	0.0328057	0.873596	-0.0424535	0.836855	0.655344	0.000279316
ENSG00000112541	PDE10A	protein_coding	green	0.166479	0.416317	-0.0583988	0.776891	0.0889804	0.665554	-0.0989313	0.63064	0.801	8.8548e-07
ENSG00000226496	LINC00323	lncRNA	green	0.162803	0.426828	0.0241968	0.906599	-0.0213707	0.917469	-0.0890705	0.665235	0.847776	4.59515e-08
ENSG00000171060	C8orf74	protein_coding	green	0.161402	0.43087	-0.0380387	0.853631	0.313943	0.118321	0.189354	0.35421	0.598807	0.00122927
ENSG00000164778	EN2	protein_coding	green	0.160635	0.433095	-0.0414358	0.840717	0.0970794	0.637083	-0.0433684	0.833387	0.568342	0.00245237
ENSG00000188981	MSANTD1	protein_coding	green	0.149185	0.467	0.211436	0.299793	-0.0253625	0.902121	-0.0746988	0.716855	0.67018	0.00017988
ENSG00000243335	KCTD7	protein_coding	green	0.146277	0.475823	-0.0151432	0.941471	-0.00457825	0.982291	0.0415972	0.840104	0.725367	2.75651e-05
ENSG00000130711	PRDM12	protein_coding	green	-0.142156	0.488476	-0.194188	0.341827	-0.0653763	0.751016	-0.0885698	0.66701	0.516172	0.00694623
ENSG00000279539	AC006486.2	TEC	green	-0.138495	0.499855	-0.233344	0.251285	0.202167	0.321962	-0.104167	0.612571	0.449154	0.0213459
ENSG00000183098	GPC6	protein_coding	green	0.136112	0.507331	-0.108873	0.596513	0.280538	0.165082	-0.066769	0.745882	0.663727	0.000218467
ENSG00000272620	AFAP1-AS1	lncRNA	green	0.132788	0.517851	0.180401	0.377833	0.139031	0.498179	0.0619324	0.763756	0.666048	0.000203822
ENSG00000034053	APBA2	protein_coding	green	-0.13226	0.519531	-0.00643851	0.975098	-0.0947565	0.6452	-0.170803	0.404139	0.4766	0.0138333
ENSG00000279069	AC015813.5	TEC	green	0.130406	0.525453	0.0637695	0.756952	-0.0194369	0.924916	0.227143	0.264462	0.501872	0.0089921
ENSG00000256894	AC022509.3	lncRNA	green	0.130071	0.526529	-0.244811	0.228068	0.252192	0.213907	0.0117049	0.954744	0.527923	0.0055721
ENSG00000246022	ALDH1L1-AS2	lncRNA	green	0.126501	0.538033	-0.130923	0.5238	0.0100345	0.961197	-0.0675169	0.743129	0.766472	4.97829e-06
ENSG00000240230	COX19	protein_coding	green	0.126348	0.53853	0.0900384	0.661808	-0.244591	0.228499	-0.150816	0.462086	0.446196	0.0223231
ENSG00000267426	AC087289.3	protein_coding	green	0.124976	0.542984	0.0867863	0.673348	-0.240125	0.237377	-0.0695434	0.735685	0.626496	0.000616559
ENSG00000067601	PMS2P4	transcribed_unprocessed_pseudogene	green	0.122555	0.550887	-0.162267	0.428372	0.0959447	0.641043	-0.250703	0.216713	0.440781	0.0242065
ENSG00000134138	MEIS2	protein_coding	green	0.12057	0.557404	-0.0637099	0.757173	0.214615	0.292417	-0.0533417	0.795791	0.635934	0.000480012
ENSG00000178947	SMIM10L2A	protein_coding	green	-0.118238	0.565107	-0.157362	0.442648	0.0611369	0.766708	-0.301371	0.134613	0.426015	0.0300045
ENSG00000261502	AC040174.1	lncRNA	green	0.117691	0.566923	-0.11798	0.565965	-0.0299327	0.88459	-0.0713079	0.729223	0.726213	2.66936e-05
ENSG00000111671	SPSB2	protein_coding	green	0.116812	0.569841	-0.240518	0.236587	-0.150438	0.463223	0.117722	0.56682	0.623581	0.000665028
ENSG00000103528	SYT17	protein_coding	green	-0.114964	0.576003	-0.285689	0.157134	0.21144	0.299785	-0.251562	0.215091	0.431358	0.02779
ENSG00000115112	TFCP2L1	protein_coding	green	0.1085	0.597779	0.1649	0.420816	0.145287	0.478847	-0.00199373	0.992288	0.626024	0.000624183
ENSG00000227051	C14orf132	protein_coding	green	0.106187	0.605655	-0.0725553	0.724665	0.250741	0.216641	-0.0216513	0.916389	0.522599	0.00616327
ENSG00000269985	AL021328.1	lncRNA	green	0.105349	0.608519	-0.15096	0.461654	0.158916	0.438096	-0.103746	0.614015	0.590675	0.00148796
ENSG00000198039	ZNF273	protein_coding	green	0.104264	0.612237	-0.0965591	0.638897	-0.0697574	0.734901	-0.157048	0.443568	0.73307	2.04791e-05
ENSG00000152433	ZNF547	protein_coding	green	0.102935	0.616804	0.519131	0.006576	0.00505652	0.980442	0.159569	0.436192	-0.415968	0.0345517
ENSG00000139445	FOXN4	protein_coding	green	0.100611	0.624819	-0.0252326	0.90262	-0.0649351	0.752645	-0.106122	0.605878	0.633136	0.000517437
ENSG00000006282	SPATA20	protein_coding	green	0.0957856	0.641599	-0.0773979	0.707059	-0.0455188	0.825248	0.125833	0.5402	0.702233	6.36435e-05
ENSG00000075618	FSCN1	protein_coding	green	-0.0951519	0.643815	-0.255835	0.20714	-0.0606054	0.768681	-0.231108	0.255985	0.470398	0.0153033
ENSG00000131730	CKMT2	protein_coding	green	0.0852609	0.678785	-0.106738	0.603775	-0.0113801	0.955999	-0.045419	0.825625	0.625346	0.000635304
ENSG00000132470	ITGB4	protein_coding	green	0.0851032	0.679349	-0.109265	0.595185	0.185885	0.363258	0.0385422	0.851715	0.760991	6.37596e-06
ENSG00000122133	PAEP	protein_coding	green	0.0822584	0.689535	-0.130202	0.526108	-0.0901039	0.661576	-0.0545589	0.791231	0.669653	0.000182785
ENSG00000254987	AP002989.1	lncRNA	green	0.082033	0.690344	-0.149244	0.466822	0.0666081	0.746474	-0.071131	0.72987	0.627231	0.000604833
ENSG00000271882	AP001330.5	lncRNA	green	-0.0801633	0.69707	-0.2787	0.167986	0.00850807	0.967097	0.0749821	0.715825	0.388357	0.0499273
ENSG00000232387	SKA2P1	processed_pseudogene	green	-0.0795346	0.699337	-0.245647	0.226433	0.144078	0.482552	0.158905	0.438128	0.319243	0.111905
ENSG00000184216	IRAK1	protein_coding	green	-0.0791666	0.700665	-0.0880671	0.668794	-0.0642433	0.755201	0.0395536	0.847868	0.452084	0.0204123
ENSG00000126603	GLIS2	protein_coding	green	-0.0726138	0.724452	-0.234633	0.248601	0.415194	0.0349236	0.093444	0.649804	0.466088	0.0163991
ENSG00000258857	AL359397.1	lncRNA	green	0.0676521	0.742632	-0.120097	0.558964	-0.0959784	0.640925	-0.101425	0.622006	0.669175	0.000185464
ENSG00000243056	EIF4EBP3	protein_coding	green	-0.0635592	0.75773	-0.13403	0.513908	-0.00399772	0.984536	-0.104477	0.611507	0.440555	0.024288
ENSG00000122643	NT5C3A	protein_coding	green	0.0628336	0.760416	-0.120524	0.557556	-0.214304	0.293134	-0.191705	0.348154	0.55173	0.00347876
ENSG00000149925	ALDOA	protein_coding	green	0.0618212	0.764169	-0.305559	0.129015	-0.0393211	0.848751	0.0440327	0.830871	0.702387	6.33052e-05
ENSG00000106683	LIMK1	protein_coding	green	0.057695	0.779514	-0.224649	0.269884	0.0838203	0.683935	-0.170787	0.404184	0.76749	4.75134e-06
ENSG00000129667	RHBDF2	protein_coding	green	0.0428786	0.835244	-0.0816271	0.691802	0.0187404	0.927599	-0.0403938	0.844674	0.633764	0.000508827
ENSG00000067225	PKM	protein_coding	green	-0.0423241	0.837346	-0.270867	0.180763	-0.073139	0.722536	0.0362334	0.86051	0.432871	0.0271874
ENSG00000225298	LINC00113	lncRNA	green	0.0390767	0.849681	-0.212379	0.297594	-0.100298	0.625902	-0.0405743	0.843988	0.683081	0.00012023
ENSG00000182240	BACE2	protein_coding	green	0.0383359	0.8525	-0.0274486	0.894112	0.141967	0.489057	-0.177832	0.384776	0.785918	1.95622e-06
ENSG00000159251	ACTC1	protein_coding	green	-0.0365814	0.859183	-0.164935	0.420715	-0.0683961	0.739897	-0.016941	0.934535	0.495918	0.00998097
ENSG00000255422	AP002954.1	lncRNA	green	0.0365688	0.859231	-0.0114333	0.955793	-0.0231963	0.910446	-0.204705	0.315796	0.503007	0.00881311
ENSG00000274444	AC078909.2	lncRNA	green	-0.0343356	0.867751	-0.00848602	0.967182	0.0589704	0.774762	-0.014724	0.943088	0.647887	0.000345429
ENSG00000139055	ERP27	protein_coding	green	0.0329305	0.873119	-0.0837195	0.684296	0.107213	0.602156	-0.126444	0.538219	0.543302	0.00412618
ENSG00000148123	PLPPR1	protein_coding	green	-0.0282152	0.891172	-0.174221	0.394656	-0.121126	0.555577	-0.112242	0.585131	0.696691	7.68845e-05
ENSG00000260658	AC138305.1	lncRNA	green	-0.0261718	0.899013	-0.217624	0.285538	-0.00191111	0.992607	-0.120216	0.558572	0.629214	0.000574148
ENSG00000232677	LINC00665	lncRNA	green	-0.0232965	0.91006	-0.221002	0.277941	0.190085	0.35232	-0.00137542	0.994679	0.522822	0.00613742
ENSG00000183647	ZNF530	protein_coding	green	0.0101257	0.960845	0.339166	0.0900709	-0.184408	0.36715	0.213862	0.294153	-0.480205	0.0130336
ENSG00000159202	UBE2Z	protein_coding	green	-0.00956184	0.963024	-0.0861578	0.675586	0.183191	0.370375	0.175384	0.391459	0.561099	0.00286251
ENSG00000254966	AC103974.1	lncRNA	green	-0.00543364	0.978983	-0.0828474	0.687421	-0.0278599	0.892535	-0.0911969	0.657715	0.577546	0.00200453
ENSG00000107562	CXCL12	protein_coding	green	-0.00513871	0.980124	-0.117342	0.568079	-0.208359	0.307045	-0.129089	0.529681	0.496166	0.00993804
ENSG00000233183	AL138889.1	lncRNA	green	0.000959287	0.996289	-0.17261	0.399109	-0.152521	0.456981	-0.0955909	0.64228	0.587401	0.00160462
ENSG00000134824	FADS2	protein_coding	orange	0.665814	0.000205262	0.311174	0.121778	0.441617	0.0239077	0.687841	0.0001031	0.165467	0.419196
ENSG00000175170	FAM182B	protein_coding	orange	0.612682	0.000876864	0.337335	0.0919322	0.0995057	0.628647	0.642675	0.000399395	0.281681	0.163296
ENSG00000078177	N4BP2	protein_coding	orange	0.607067	0.00100719	0.304426	0.130512	0.234528	0.248818	0.638746	0.000444808	0.387854	0.0502504
ENSG00000122970	IFT81	protein_coding	orange	0.57754	0.00200477	0.473494	0.0145543	0.566027	0.0025776	0.696074	7.84995e-05	0.171275	0.402824
ENSG00000228203	RNF144A-AS1	lncRNA	orange	0.532758	0.00507748	0.409294	0.0378658	0.182633	0.371861	0.734049	1.97055e-05	0.0646583	0.753667
ENSG00000263727	AP001178.1	lncRNA	orange	0.531758	0.00517663	0.442142	0.0237214	0.12542	0.54154	0.658447	0.000255255	0.142421	0.487655
ENSG00000197283	SYNGAP1	protein_coding	orange	0.524835	0.00590891	0.324267	0.106064	0.351132	0.0785991	0.603475	0.00109909	0.0874078	0.671137
ENSG00000230131	AL160290.2	lncRNA	orange	0.522215	0.00620787	0.449785	0.0211419	0.14095	0.492207	0.650908	0.000317155	0.249827	0.218378
ENSG00000112280	COL9A1	protein_coding	orange	0.521179	0.00632954	0.312348	0.120304	0.211678	0.299227	0.766665	4.9346e-06	0.120191	0.558653
ENSG00000173535	TNFRSF10C	protein_coding	orange	0.515729	0.00700323	0.141035	0.491945	0.296931	0.140736	0.749275	1.05946e-05	0.23313	0.251733
ENSG00000256124	LINC01152	lncRNA	orange	0.509507	0.00784487	0.251772	0.214695	0.511869	0.00751586	0.531446	0.00520788	-0.0265331	0.897626
ENSG00000279812	AC120057.5	TEC	orange	0.493323	0.0104394	0.26921	0.18355	-0.0104072	0.959758	0.743992	1.32037e-05	-0.0729675	0.723161
ENSG00000139625	MAP3K12	protein_coding	orange	0.493165	0.0104678	0.25665	0.205646	0.397705	0.044216	0.739717	1.57185e-05	0.0725542	0.724669
ENSG00000228127	LINC01649	lncRNA	orange	0.492974	0.0105024	0.430649	0.0280761	0.142584	0.487151	0.834028	1.20328e-07	0.120988	0.556029
ENSG00000157856	DRC1	protein_coding	orange	0.49119	0.0108293	0.0407697	0.843246	0.434865	0.0264094	0.838047	9.1654e-08	-0.0257991	0.900444
ENSG00000164746	C7orf57	protein_coding	orange	0.486969	0.0116363	-0.0808622	0.694553	0.372729	0.0607511	0.748141	1.11124e-05	0.172148	0.400394
ENSG00000144596	GRIP2	protein_coding	orange	0.480288	0.0130156	0.0381025	0.853388	0.014985	0.942081	0.771231	3.99427e-06	0.18363	0.369211
ENSG00000232450	AL133517.1	transcribed_processed_pseudogene	orange	0.471652	0.0149962	0.316697	0.114954	0.397981	0.0440554	0.690055	9.58952e-05	0.235094	0.247646
ENSG00000248705	AC114812.4	unprocessed_pseudogene	orange	0.467195	0.0161116	0.234511	0.248855	0.0989962	0.630415	0.8482	4.45395e-08	0.302545	0.133026
ENSG00000270067	AC008536.1	lncRNA	orange	0.46305	0.0172094	0.400744	0.0424747	0.221612	0.276583	0.787372	1.81725e-06	0.115144	0.575401
ENSG00000118785	SPP1	protein_coding	orange	0.454001	0.01982	0.480612	0.0129458	0.273598	0.176233	0.646268	0.000361463	-0.0258126	0.900392
ENSG00000234373	SNX18P7	processed_pseudogene	orange	0.447389	0.0219248	0.100598	0.624864	0.303488	0.131762	0.488433	0.0113511	0.133921	0.514252
ENSG00000171435	KSR2	protein_coding	orange	0.438458	0.0250532	0.136237	0.506937	0.332119	0.0973921	0.905615	2.02318e-10	0.101175	0.622869
ENSG00000165061	ZMAT4	protein_coding	orange	0.426813	0.0296651	0.0446693	0.828461	0.219858	0.2805	0.907313	1.64189e-10	-0.0490767	0.81182
ENSG00000239351	NPM1P29	processed_pseudogene	orange	0.413107	0.0359426	0.238619	0.24042	0.130232	0.526011	0.652044	0.000307064	0.218203	0.284228
ENSG00000185737	NRG3	protein_coding	orange	0.411957	0.0365141	-0.0123051	0.952426	0.439876	0.0245338	0.702126	6.38771e-05	-0.0144543	0.944129
ENSG00000109814	UGDH	protein_coding	orange	0.403777	0.0407917	0.0523769	0.79941	0.0708493	0.730901	0.638497	0.000447826	0.442982	0.0234261
ENSG00000197165	SULT1A2	protein_coding	orange	0.401589	0.0420004	0.14876	0.468283	0.107491	0.601212	0.737193	1.73955e-05	0.0815518	0.692073
ENSG00000114270	COL7A1	protein_coding	orange	0.397844	0.0441355	0.00668966	0.974126	0.156063	0.446471	0.869822	7.91972e-09	-0.0418879	0.839001
ENSG00000171451	DSEL	protein_coding	orange	0.39646	0.0449457	0.252155	0.213975	0.164115	0.42306	0.773698	3.55596e-06	-0.0574416	0.780459
ENSG00000237423	LINC01522	lncRNA	orange	0.393493	0.0467221	0.0616229	0.764904	0.100402	0.625544	0.966972	9.39491e-16	0.125874	0.540067
ENSG00000187627	RGPD1	protein_coding	orange	0.392104	0.0475724	0.128428	0.531808	0.347807	0.0816694	0.788121	1.74924e-06	-0.0854941	0.677953
ENSG00000254233	LINC02365	lncRNA	orange	0.38645	0.0511605	0.262314	0.195467	0.0606657	0.768457	0.899295	4.25863e-10	-0.0227688	0.91209
ENSG00000170703	TTLL6	protein_coding	orange	0.380464	0.0551875	0.05505	0.789394	0.019764	0.923656	0.938599	1.38207e-12	0.0271142	0.895396
ENSG00000123892	RAB38	protein_coding	orange	0.376031	0.0583249	0.109301	0.595062	0.425581	0.0301904	0.690871	9.33543e-05	0.246809	0.224175
ENSG00000250410	AC112722.1	lncRNA	orange	0.373375	0.0602703	0.20343	0.318884	0.0955884	0.642288	0.586992	0.00161973	-0.171943	0.400963
ENSG00000167080	B4GALNT2	protein_coding	orange	0.371512	0.061665	0.0987056	0.631424	0.10887	0.596522	0.88353	2.24256e-09	0.011284	0.95637
ENSG00000059691	GATB	protein_coding	orange	0.371444	0.0617163	0.150595	0.46275	-0.0342821	0.867955	0.541158	0.00430624	0.00572188	0.977869
ENSG00000162040	HS3ST6	protein_coding	orange	0.37104	0.0620222	0.065913	0.749036	0.0661562	0.74814	0.948379	1.81326e-13	-0.0178758	0.930932
ENSG00000183072	NKX2-5	protein_coding	orange	0.369056	0.0635407	-0.0251269	0.903025	0.0939664	0.64797	0.711523	4.59173e-05	0.00986267	0.961862
ENSG00000185988	PLK5	protein_coding	orange	0.360308	0.0705842	0.211932	0.298635	0.107271	0.601961	0.854129	2.85157e-08	0.00132761	0.994864
ENSG00000165323	FAT3	protein_coding	orange	0.357645	0.0728427	-0.0209711	0.919008	0.0273969	0.894311	0.862771	1.43584e-08	0.0442147	0.830182
ENSG00000251432	AC108062.1	lncRNA	orange	0.356311	0.0739942	0.165934	0.417867	0.297678	0.139693	0.776091	3.17243e-06	-0.184155	0.36782
ENSG00000145040	UCN2	protein_coding	orange	0.350528	0.0791508	-0.0396639	0.847448	0.0593136	0.773484	0.837458	9.54297e-08	-0.0209038	0.919267
ENSG00000214999	AC129492.1	lncRNA	orange	0.348924	0.0806275	0.0326539	0.874176	-0.0627525	0.760717	0.718048	3.62347e-05	0.0770037	0.708487
ENSG00000114268	PFKFB4	protein_coding	orange	0.348134	0.0813635	0.220717	0.278576	0.0490794	0.81181	0.541533	0.00427425	0.0730508	0.722858
ENSG00000269959	SPACA6P-AS	lncRNA	orange	0.346009	0.0833658	0.121522	0.554276	0.0832485	0.685983	0.49092	0.0108794	0.0519565	0.800989
ENSG00000180626	ZNF594	protein_coding	orange	0.343834	0.0854545	0.33002	0.0996564	0.299269	0.137487	0.556023	0.00318365	-0.0594646	0.772922
ENSG00000110318	CEP126	protein_coding	orange	0.341666	0.0875761	0.0666122	0.746459	0.15025	0.463788	0.865339	1.16061e-08	-0.0718114	0.727382
ENSG00000156096	UGT2B4	protein_coding	orange	0.334979	0.0943693	0.0243401	0.906049	0.0527975	0.797832	0.955608	3.07933e-14	0.0206486	0.920249
ENSG00000279522	AC008536.3	TEC	orange	0.333759	0.0956499	0.299667	0.13694	0.131037	0.523435	0.663298	0.000221271	0.122031	0.552604
ENSG00000076067	RBMS2	protein_coding	orange	0.332725	0.0967454	0.234381	0.249125	0.410498	0.0372499	0.653467	0.000294818	-0.0305371	0.882275
ENSG00000139354	GAS2L3	protein_coding	orange	0.331205	0.0983736	0.386751	0.0509646	0.046056	0.823217	0.49669	0.00984776	-0.165604	0.418805
ENSG00000134762	DSC3	protein_coding	orange	0.330619	0.0990066	0.0553421	0.788301	0.0723172	0.725535	0.80381	7.58292e-07	-0.0633477	0.758513
ENSG00000250420	AACSP1	transcribed_unprocessed_pseudogene	orange	0.329098	0.100663	0.101767	0.620826	0.0251327	0.903003	0.858039	2.1023e-08	0.201544	0.323487
ENSG00000255741	AP000808.2	lncRNA	orange	0.322841	0.107698	0.14638	0.475509	0.131209	0.522885	0.945739	3.25431e-13	-0.0167117	0.93542
ENSG00000119771	KLHL29	protein_coding	orange	0.320374	0.11057	0.148526	0.46899	0.434063	0.0267201	0.647802	0.000346253	0.0807135	0.695088
ENSG00000272389	AC008536.2	lncRNA	orange	0.314349	0.117821	0.346243	0.083144	0.133698	0.514961	0.58635	0.00164372	0.0381778	0.853102
ENSG00000182256	GABRG3	protein_coding	orange	0.313126	0.119334	0.104301	0.61211	0.215012	0.291502	0.845201	5.54168e-08	0.0336427	0.870397
ENSG00000229585	RPL21P44	processed_pseudogene	orange	0.308244	0.125517	0.415887	0.0345905	0.350171	0.0794776	0.588321	0.00157107	-0.196507	0.335979
ENSG00000273077	AC110609.1	lncRNA	orange	0.301985	0.133781	0.229804	0.258755	0.235407	0.246999	0.656432	0.000270663	-0.0539357	0.793565
ENSG00000264696	NA	NA	orange	0.301963	0.133811	-0.0018796	0.992729	0.0577101	0.779457	0.898434	4.69482e-10	0.0131947	0.948991
ENSG00000176204	LRRTM4	protein_coding	orange	0.297805	0.139516	0.0329671	0.872979	0.0770401	0.708355	0.893024	8.50391e-10	-0.0417499	0.839525
ENSG00000203727	SAMD5	protein_coding	orange	0.295697	0.142474	-0.100507	0.625181	-0.0468793	0.820107	0.688819	9.98632e-05	0.157572	0.44203
ENSG00000132749	TESMIN	protein_coding	orange	0.292888	0.146485	0.126039	0.539531	0.0611757	0.766564	0.853027	3.10255e-08	0.0408199	0.843055
ENSG00000188730	VWC2	protein_coding	orange	0.290526	0.149921	0.0543891	0.791867	0.0203573	0.921371	0.902994	2.77179e-10	0.00613239	0.976281
ENSG00000196337	CGB7	protein_coding	orange	0.290242	0.150337	-0.0381945	0.853038	0.0849095	0.68004	0.759678	6.75868e-06	-0.0232759	0.91014
ENSG00000131080	EDA2R	protein_coding	orange	0.289781	0.151017	-0.0426046	0.836282	0.109933	0.592923	0.796596	1.12365e-06	0.156096	0.446371
ENSG00000250740	AC109361.2	lncRNA	orange	0.289534	0.151381	0.0720607	0.726472	0.0862425	0.675284	0.684529	0.000114772	-0.04661	0.821124
ENSG00000254944	ATP5F1P5	processed_pseudogene	orange	0.289284	0.15175	-0.0392223	0.849127	0.304975	0.129785	0.657636	0.000261365	0.275777	0.172677
ENSG00000258813	AL442663.3	lncRNA	orange	0.289148	0.151951	0.265387	0.190092	-0.0269864	0.895886	0.580366	0.0018822	0.151129	0.461148
ENSG00000233818	AP000695.2	lncRNA	orange	0.285186	0.157898	-0.103848	0.613664	0.141991	0.488984	0.591191	0.00147023	0.412322	0.0363324
ENSG00000258667	HIF1A-AS2	lncRNA	orange	0.283587	0.160344	0.0324098	0.87511	0.179822	0.379393	0.675376	0.000153294	0.143116	0.485512
ENSG00000261089	CDC37P2	processed_pseudogene	orange	0.278387	0.168485	0.168896	0.409487	0.0555165	0.787649	0.580502	0.00187644	0.0623268	0.762294
ENSG00000238042	LINC02257	lncRNA	orange	0.274843	0.174196	0.0451773	0.826539	0.060173	0.770288	0.934695	2.83756e-12	-0.0141515	0.945298
ENSG00000176092	CRYBG2	protein_coding	orange	0.269225	0.183525	0.0386304	0.851379	-0.0436725	0.832235	0.816814	3.57779e-07	-0.139879	0.495535
ENSG00000076351	SLC46A1	protein_coding	orange	0.259833	0.199882	0.31213	0.120577	0.114548	0.577392	0.512837	0.00738444	-0.189009	0.355104
ENSG00000280134	AL731532.2	TEC	orange	0.2582	0.202825	0.0753548	0.71447	-0.0498981	0.808727	0.799374	9.67528e-07	-0.0975907	0.635301
ENSG00000179148	ALOXE3	protein_coding	orange	0.25549	0.207773	-0.235625	0.246549	-0.0103551	0.959959	0.498	0.00962532	0.487394	0.0115528
ENSG00000126562	WNK4	protein_coding	orange	0.254657	0.209311	0.0323943	0.875169	-0.0738413	0.719976	0.604814	0.00106402	-0.0409669	0.842497
ENSG00000276966	HIST1H4E	protein_coding	orange	0.251659	0.214908	0.0425422	0.836519	0.0290385	0.888016	0.609531	0.000948076	-0.0842865	0.682267
ENSG00000150782	IL18	protein_coding	orange	0.249534	0.218935	0.210516	0.301951	0.375572	0.0586581	0.426609	0.0297517	-0.120225	0.558541
ENSG00000198729	PPP1R14C	protein_coding	orange	0.249498	0.219005	-0.124161	0.545638	0.322426	0.108177	0.619987	0.000729347	0.287889	0.153823
ENSG00000150551	LYPD1	protein_coding	orange	0.243069	0.2315	-0.117277	0.568297	-0.0363868	0.859925	0.725948	2.69636e-05	0.0964889	0.639142
ENSG00000007306	CEACAM7	protein_coding	orange	0.24051	0.236602	-0.0294759	0.88634	-0.00405162	0.984328	0.741455	1.46487e-05	0.00789003	0.969486
ENSG00000257642	KCCAT198	lncRNA	orange	0.22745	0.263798	-0.0969256	0.637619	0.194129	0.341977	0.398254	0.0438973	0.389951	0.0489149
ENSG00000181126	HLA-V	transcribed_unprocessed_pseudogene	orange	0.226307	0.26627	-0.0209748	0.918993	0.0256547	0.900998	0.760803	6.4295e-06	0.102812	0.617227
ENSG00000258774	NANOGP7	transcribed_processed_pseudogene	orange	0.222464	0.274693	0.175753	0.390447	0.0609675	0.767337	0.765485	5.20778e-06	-0.0402368	0.84527
ENSG00000109452	INPP4B	protein_coding	orange	0.221767	0.276238	0.0158181	0.938866	0.0871305	0.672123	0.710765	4.71778e-05	-0.110343	0.591536
ENSG00000240216	CPHL1P	transcribed_unitary_pseudogene	orange	0.220045	0.28008	-0.0193772	0.925146	0.0957231	0.641817	0.78551	1.99679e-06	-0.0627944	0.760562
ENSG00000132639	SNAP25	protein_coding	orange	0.210369	0.302295	0.225155	0.268777	0.347862	0.0816175	0.600034	0.00119383	-0.132828	0.517725
ENSG00000103647	CORO2B	protein_coding	orange	0.195232	0.339187	-0.0546374	0.790938	0.125469	0.541383	0.616829	0.000790233	0.328855	0.100931
ENSG00000186765	FSCN2	protein_coding	orange	0.19215	0.347015	0.0393655	0.848583	0.0503979	0.806846	0.665075	0.000209855	0.141893	0.489287
ENSG00000259498	TPM1-AS	lncRNA	orange	0.191553	0.348544	0.106944	0.603073	0.12242	0.551329	0.750842	9.91461e-06	-0.13517	0.5103
ENSG00000111785	RIC8B	protein_coding	orange	0.189291	0.354372	0.0446736	0.828445	0.292567	0.146949	0.686493	0.000107718	0.0933152	0.650256
ENSG00000144452	ABCA12	protein_coding	orange	0.187763	0.358342	0.0296915	0.885514	0.211315	0.300078	0.656032	0.000273819	0.106198	0.605619
ENSG00000163393	SLC22A15	protein_coding	orange	0.186478	0.361701	-0.0586494	0.775957	0.399878	0.0429653	0.581019	0.00185483	0.0175721	0.932102
ENSG00000274911	AL627230.2	unprocessed_pseudogene	orange	0.182494	0.372232	-0.0791991	0.700548	0.383733	0.0529585	0.570732	0.00232856	-0.219681	0.280895
ENSG00000229558	SACS-AS1	lncRNA	orange	0.182146	0.373158	0.0371146	0.857151	0.117654	0.567044	0.647801	0.000346266	0.0446905	0.828381
ENSG00000087494	PTHLH	protein_coding	orange	0.178259	0.383616	-0.0602441	0.770024	0.337777	0.0914804	0.610294	0.000930384	-0.096043	0.640699
ENSG00000240498	CDKN2B-AS1	lncRNA	orange	0.175972	0.389848	0.00905846	0.964969	0.0228526	0.911768	0.70413	5.95973e-05	0.111628	0.587197
ENSG00000259534	AC087477.4	lncRNA	orange	0.174794	0.393079	0.0679047	0.741703	0.0548381	0.790187	0.813442	4.37125e-07	0.0133355	0.948447
ENSG00000242295	AC087477.1	processed_pseudogene	orange	0.171081	0.403362	0.0698477	0.73457	0.0568286	0.782746	0.798297	1.02556e-06	0.017026	0.934208
ENSG00000272862	AC106052.1	lncRNA	orange	0.17063	0.404622	0.00280839	0.989137	-0.0133412	0.948426	0.662644	0.000225605	0.0207464	0.919873
ENSG00000278318	ZNF229	protein_coding	orange	0.166345	0.416699	-0.0632581	0.758845	0.245526	0.22667	0.560066	0.00292552	-0.211252	0.300225
ENSG00000154537	FAM27C	lncRNA	orange	0.165997	0.417686	-0.116036	0.572426	0.230538	0.257193	0.64818	0.000342592	-0.135538	0.509139
ENSG00000099194	SCD	protein_coding	orange	0.155777	0.447313	0.0438826	0.83144	-0.0875898	0.67049	0.613724	0.000854348	0.00473386	0.981689
ENSG00000149582	TMEM25	protein_coding	orange	0.152492	0.457069	0.00956402	0.963016	0.00731735	0.9717	0.461528	0.0176277	-0.128843	0.530471
ENSG00000245248	USP2-AS1	lncRNA	orange	0.137379	0.503349	0.0278078	0.892735	0.0576121	0.779823	0.499529	0.00937094	-0.0812513	0.693153
ENSG00000229140	CCDC26	lncRNA	orange	0.136074	0.507449	-0.106202	0.605606	0.145724	0.477513	0.480841	0.0128965	0.475053	0.0141886
ENSG00000227484	CR559946.1	lncRNA	orange	0.129058	0.529779	0.178499	0.382967	-0.0157367	0.939181	0.578832	0.0019479	-0.162346	0.428144
ENSG00000231672	DIRC3	protein_coding	orange	0.126039	0.53953	-0.0423497	0.837249	-0.0136819	0.94711	0.666169	0.000203085	0.17506	0.392347
ENSG00000135925	WNT10A	protein_coding	orange	0.12422	0.545448	0.0330271	0.87275	0.142605	0.487088	0.704452	5.89343e-05	-0.068066	0.74111
ENSG00000070729	CNGB1	protein_coding	orange	0.122128	0.552285	0.0128685	0.950251	0.081486	0.692309	0.696439	7.75395e-05	0.0642963	0.755005
ENSG00000257042	AC008011.2	lncRNA	orange	0.121106	0.555642	-0.0634877	0.757995	0.0467683	0.820526	0.629483	0.000570096	-0.127757	0.53397
ENSG00000092607	TBX15	protein_coding	orange	0.116775	0.569964	-0.209349	0.3047	-0.105303	0.608679	0.516977	0.00684389	0.194233	0.341712
ENSG00000129654	FOXJ1	protein_coding	orange	0.110752	0.590155	-0.0714212	0.728809	0.163932	0.423584	0.639165	0.000439756	-0.039675	0.847406
ENSG00000130813	C19orf66	protein_coding	orange	0.108444	0.597969	0.0251635	0.902885	-0.152233	0.45784	0.722208	3.10507e-05	-0.00974883	0.962301
ENSG00000183780	SLC35F3	protein_coding	orange	0.106307	0.605245	-0.139948	0.495323	0.312589	0.120002	0.47185	0.0149482	0.456654	0.019023
ENSG00000235899	LINC01564	lncRNA	orange	0.097073	0.637105	0.0252657	0.902492	-0.174333	0.394348	0.66609	0.000203567	-0.0115624	0.955295
ENSG00000257918	AC079385.3	lncRNA	orange	0.0682157	0.74056	-0.0969034	0.637696	-0.0141686	0.945232	0.696908	7.63223e-05	0.0678604	0.741866
ENSG00000183018	SPNS2	protein_coding	orange	0.0599692	0.771046	-0.0851003	0.679359	-0.156692	0.444615	0.731962	2.13866e-05	0.0471174	0.819208
ENSG00000263325	AC003965.2	lncRNA	orange	0.0521449	0.800281	-0.016849	0.93489	0.258871	0.201612	0.653887	0.000291288	-0.0764293	0.710569
ENSG00000206053	JPT2	protein_coding	orange	-0.0475585	0.817544	-0.0801575	0.697091	0.12529	0.541962	0.499279	0.00941218	0.126217	0.538953
ENSG00000161714	PLCD3	protein_coding	orange	-0.0362036	0.860623	-0.1622	0.428567	-0.00365901	0.985846	0.586628	0.00163328	-0.0110738	0.957182
ENSG00000249635	AC109361.1	lncRNA	orange	0.0354893	0.863347	0.118725	0.563494	0.0135291	0.9477	0.55991	0.00293515	-0.0119891	0.953647
ENSG00000112852	PCDHB2	protein_coding	orange	-0.0332054	0.872068	-0.0350549	0.865005	-0.0207118	0.920006	0.427145	0.0295249	-0.130116	0.526382
ENSG00000267701	NA	NA	orange	0.0317769	0.87753	-0.120338	0.558168	-0.0547175	0.790638	0.691223	9.22766e-05	-0.0340096	0.868996
ENSG00000109944	JHY	protein_coding	orange	0.0270969	0.895462	-0.208206	0.307408	0.267996	0.18561	0.442439	0.0236169	0.0103334	0.960043
ENSG00000176289	IDSP1	unprocessed_pseudogene	orange	0.0266999	0.896985	0.0114128	0.955873	-0.0896161	0.663302	0.661816	0.000231207	-0.0980134	0.63383
ENSG00000274026	FAM27E3	transcribed_processed_pseudogene	orange	-0.000587052	0.997729	-0.132067	0.520146	-0.0410508	0.842178	0.611751	0.00089741	-0.182182	0.373064
ENSG00000131044	TTLL9	protein_coding	royalblue	0.57319	0.00220683	0.412578	0.0362049	0.727501	2.54123e-05	0.461811	0.0175492	0.0522705	0.79981
ENSG00000145700	ANKRD31	protein_coding	royalblue	0.542655	0.00417979	0.249655	0.218706	0.666005	0.000204085	0.318637	0.112625	0.232081	0.253932
ENSG00000272975	MYHAS	lncRNA	royalblue	0.539241	0.00447289	0.114467	0.577665	0.804733	7.20234e-07	0.0753299	0.71456	0.329046	0.10072
ENSG00000256564	AC007552.2	lncRNA	royalblue	0.527727	0.00559302	0.176721	0.387801	0.70351	6.08941e-05	0.356598	0.0737452	0.294674	0.143926
ENSG00000198707	CEP290	protein_coding	royalblue	0.525585	0.00582552	0.412882	0.036054	0.610579	0.000923865	0.282544	0.161954	0.623007	0.000674962
ENSG00000152580	IGSF10	protein_coding	royalblue	0.524484	0.00594823	0.125057	0.54272	0.758597	7.08939e-06	0.282502	0.162019	-0.00567628	0.978045
ENSG00000177994	C2orf73	protein_coding	royalblue	0.513532	0.00729125	0.360214	0.0706627	0.812816	4.53494e-07	0.151997	0.458546	0.253814	0.210875
ENSG00000172817	CYP7B1	protein_coding	royalblue	0.513314	0.00732048	0.23617	0.245426	0.866545	1.04857e-08	0.105584	0.607716	0.280636	0.164929
ENSG00000224984	AL512363.1	lncRNA	royalblue	0.50976	0.00780907	0.185145	0.365206	0.667615	0.00019443	0.0589557	0.774816	0.231402	0.255365
ENSG00000165309	ARMC3	protein_coding	royalblue	0.508352	0.00801019	0.0834807	0.685151	0.859177	1.92048e-08	0.213685	0.294562	-0.016904	0.934678
ENSG00000139645	ANKRD52	protein_coding	royalblue	0.506244	0.00831916	0.252992	0.212408	0.515841	0.00698877	0.16194	0.429317	0.223861	0.271612
ENSG00000142609	CFAP74	protein_coding	royalblue	0.500898	0.00914798	0.168285	0.411206	0.812712	4.56273e-07	0.00293718	0.988638	-0.0673495	0.743745
ENSG00000009830	POMT2	protein_coding	royalblue	0.491235	0.0108208	0.0527673	0.797946	0.669777	0.000182101	0.364879	0.0668331	0.358729	0.0719165
ENSG00000259495	AC016705.2	lncRNA	royalblue	0.48827	0.0113825	0.291834	0.148012	0.670782	0.000176605	0.176296	0.388962	0.583609	0.00174952
ENSG00000255750	AC022509.1	lncRNA	royalblue	0.486632	0.011703	0.226183	0.266539	0.845691	5.34881e-08	-0.0623561	0.762186	0.236666	0.244407
ENSG00000159842	ABR	protein_coding	royalblue	0.485432	0.0119424	0.32983	0.0998635	0.599946	0.00119632	0.212933	0.296305	0.271379	0.179908
ENSG00000253837	AC090197.1	lncRNA	royalblue	0.478069	0.0135027	0.176149	0.389362	0.651079	0.000315624	0.062799	0.760545	0.418642	0.033291
ENSG00000165511	C10orf25	lncRNA	royalblue	0.476506	0.0138546	0.293345	0.145827	0.761367	6.26998e-06	0.0391795	0.84929	0.310538	0.122582
ENSG00000100583	SAMD15	protein_coding	royalblue	0.467559	0.0160181	0.253941	0.210639	0.807966	6.00105e-07	0.333327	0.0961063	0.106193	0.605635
ENSG00000213376	GAPDHP71	processed_pseudogene	royalblue	0.461076	0.0177533	0.36845	0.0640103	0.646307	0.000361069	-0.0116035	0.955136	0.181246	0.375565
ENSG00000187987	ZSCAN23	protein_coding	royalblue	0.46007	0.0180361	0.127557	0.534617	0.698036	7.3466e-05	0.504678	0.00855521	0.114637	0.577097
ENSG00000249699	LINC02261	lncRNA	royalblue	0.459126	0.0183045	-0.00270781	0.989526	0.782558	2.3142e-06	-0.000652816	0.997475	0.579459	0.00192083
ENSG00000196498	NCOR2	protein_coding	royalblue	0.458422	0.018507	0.0532495	0.796137	0.793817	1.30204e-06	0.200005	0.327273	0.483312	0.0123755
ENSG00000118997	DNAH7	protein_coding	royalblue	0.449681	0.0211756	0.256768	0.20543	0.860521	1.72414e-08	0.275053	0.173854	0.271254	0.180116
ENSG00000165972	CCDC38	protein_coding	royalblue	0.443577	0.0232188	0.16474	0.421271	0.596897	0.00128623	0.465359	0.0165905	-0.104637	0.610959
ENSG00000139263	LRIG3	protein_coding	royalblue	0.441291	0.0240238	0.148495	0.469084	0.783636	2.19342e-06	-0.0342535	0.868064	0.172177	0.400312
ENSG00000235884	LINC00941	lncRNA	royalblue	0.436418	0.0258162	-0.0423014	0.837432	0.619066	0.000746658	0.432815	0.0272096	0.379449	0.0558937
ENSG00000230445	LRRC37A6P	transcribed_processed_pseudogene	royalblue	0.432327	0.027403	0.259897	0.199768	0.765792	5.13547e-06	0.111624	0.587211	0.261737	0.196489
ENSG00000074657	ZNF532	protein_coding	royalblue	0.43089	0.0279784	0.32533	0.104858	0.608775	0.000965883	0.231232	0.255723	-0.125427	0.541516
ENSG00000111328	CDK2AP1	protein_coding	royalblue	0.428486	0.0289634	0.123632	0.547365	0.691232	9.22488e-05	0.16944	0.407957	0.294357	0.144378
ENSG00000182263	FIGN	protein_coding	royalblue	0.422536	0.0315214	0.541203	0.00430242	0.549094	0.00367121	0.329157	0.100599	-0.08873	0.666442
ENSG00000141519	CCDC40	protein_coding	royalblue	0.421817	0.0318421	0.335424	0.0939049	0.713903	4.21488e-05	0.344111	0.0851871	0.122455	0.551215
ENSG00000279068	AC244517.6	protein_coding	royalblue	0.418275	0.0334617	-0.0246509	0.904855	0.669625	0.000182941	0.159479	0.436455	0.406639	0.0392522
ENSG00000240250	RN7SL541P	misc_RNA	royalblue	0.417898	0.0336383	0.1353	0.50989	0.66198	0.000230089	0.192332	0.34655	0.146859	0.474049
ENSG00000140839	CLEC18B	protein_coding	royalblue	0.417479	0.0338348	0.0858077	0.676834	0.729721	2.33317e-05	0.0882509	0.668142	-0.0285063	0.890056
ENSG00000214914	RPL23AP3	processed_pseudogene	royalblue	0.41579	0.0346372	0.162143	0.428732	0.824726	2.20005e-07	0.104514	0.61138	0.195245	0.339154
ENSG00000109738	GLRB	protein_coding	royalblue	0.409841	0.0375849	0.365868	0.0660413	0.741946	1.43588e-05	0.378131	0.0568218	-0.0240155	0.907296
ENSG00000135083	CCNJL	protein_coding	royalblue	0.409289	0.037868	-0.131575	0.521716	0.673533	0.000162298	0.129159	0.529455	0.26377	0.192909
ENSG00000151229	SLC2A13	protein_coding	royalblue	0.400648	0.042529	0.00850449	0.967111	0.817982	3.33484e-07	0.0892693	0.66453	8.05593e-05	0.999688
ENSG00000165671	NSD1	protein_coding	royalblue	0.399586	0.043132	0.378281	0.0567153	0.469545	0.0155153	0.170991	0.403614	0.0266581	0.897146
ENSG00000133640	LRRIQ1	protein_coding	royalblue	0.397587	0.044285	-0.0379278	0.854053	0.84841	4.38577e-08	0.257153	0.204728	0.214123	0.293551
ENSG00000077514	POLD3	protein_coding	royalblue	0.395503	0.0455123	0.260504	0.198682	0.512717	0.00740063	0.163274	0.425474	-0.0292741	0.887113
ENSG00000180263	FGD6	protein_coding	royalblue	0.39218	0.0475256	0.157255	0.442961	0.644943	0.00037507	0.214007	0.293818	0.254421	0.209748
ENSG00000132561	MATN2	protein_coding	royalblue	0.391596	0.0478867	0.0135697	0.947543	0.680826	0.000129186	0.193442	0.343721	-0.102259	0.619132
ENSG00000141540	TTYH2	protein_coding	royalblue	0.386841	0.0509063	0.239435	0.238769	0.665379	0.000207952	-0.159946	0.435096	0.251254	0.215671
ENSG00000227141	AL160286.1	processed_pseudogene	royalblue	0.385225	0.0519657	0.461007	0.0177726	0.640209	0.0004274	-0.060209	0.770154	0.240436	0.236752
ENSG00000228940	AL391730.1	unprocessed_pseudogene	royalblue	0.385112	0.0520399	0.0938377	0.648421	0.845225	5.53186e-08	0.0123732	0.952163	-0.0179688	0.930573
ENSG00000228157	AC007952.2	lncRNA	royalblue	0.38452	0.0524328	0.0707548	0.731247	0.758127	7.23746e-06	0.104757	0.610548	-0.043201	0.834022
ENSG00000276545	PCDHGB9P	unprocessed_pseudogene	royalblue	0.382667	0.0536774	-0.0165219	0.936152	0.782234	2.35172e-06	0.339121	0.090116	0.0776706	0.706072
ENSG00000245281	AC124242.1	lncRNA	royalblue	0.380405	0.0552281	0.220786	0.278422	0.779416	2.70106e-06	0.239743	0.238147	-0.0470377	0.819509
ENSG00000138735	PDE5A	protein_coding	royalblue	0.379446	0.0558957	0.357895	0.0726281	0.650908	0.000317161	0.394232	0.0462744	-0.120438	0.557842
ENSG00000134294	SLC38A2	protein_coding	royalblue	0.376314	0.0581209	0.0359952	0.861418	0.527574	0.00560935	0.537387	0.00463925	-0.0135936	0.947451
ENSG00000102452	NALCN	protein_coding	royalblue	0.376302	0.0581294	0.116567	0.570658	0.727361	2.55488e-05	0.111621	0.58722	0.22496	0.269204
ENSG00000249550	LINC01234	lncRNA	royalblue	0.375782	0.0585057	-0.0848624	0.680209	0.724789	2.81764e-05	-0.041502	0.840466	-0.0204486	0.921019
ENSG00000214650	AC073592.1	lncRNA	royalblue	0.375208	0.0589223	0.0917194	0.655872	0.825063	2.15381e-07	0.0430691	0.834522	-0.000938579	0.996369
ENSG00000107186	MPDZ	protein_coding	royalblue	0.374987	0.0590842	0.111516	0.587576	0.761399	6.26096e-06	0.108452	0.597941	-0.0400479	0.845988
ENSG00000205562	AL049775.1	lncRNA	royalblue	0.370965	0.0620787	-0.0190112	0.926556	0.595281	0.00133623	0.19604	0.337152	-0.071902	0.727051
ENSG00000175970	UNC119B	protein_coding	royalblue	0.369847	0.0629322	0.204505	0.316279	0.378784	0.0563602	0.134596	0.512116	0.0951281	0.643899
ENSG00000259518	LINC01583	lncRNA	royalblue	0.36888	0.063677	0.0638439	0.756677	0.840861	7.54173e-08	0.00810342	0.968661	0.333483	0.0959415
ENSG00000263680	AC007639.1	lncRNA	royalblue	0.365565	0.0662835	0.132435	0.518975	0.634082	0.000504507	0.0230124	0.911153	0.565489	0.0026075
ENSG00000112293	GPLD1	protein_coding	royalblue	0.355175	0.0749864	0.21959	0.281102	0.536999	0.00467466	-0.0922557	0.653983	0.245409	0.226897
ENSG00000120322	PCDHB8	protein_coding	royalblue	0.35337	0.0765836	-0.0269041	0.896202	0.731818	2.1507e-05	0.0925541	0.652932	0.273008	0.177206
ENSG00000255992	AC131009.1	lncRNA	royalblue	0.352907	0.0769975	0.244035	0.229593	0.669912	0.000181355	0.44354	0.0232316	0.191607	0.348407
ENSG00000101384	JAG1	protein_coding	royalblue	0.346683	0.0827265	0.16575	0.418391	0.691988	8.99713e-05	0.381283	0.0546221	-0.0416959	0.839729
ENSG00000108018	SORCS1	protein_coding	royalblue	0.346649	0.0827594	0.146467	0.475243	0.555868	0.00319392	-0.117479	0.567626	-0.130583	0.524887
ENSG00000142621	FHAD1	protein_coding	royalblue	0.345354	0.0839911	0.0196257	0.924189	0.671507	0.000172731	0.10478	0.610467	-0.0350112	0.865172
ENSG00000273259	AL049839.2	protein_coding	royalblue	0.344843	0.0844815	0.0563968	0.784359	0.90476	2.2443e-10	0.212335	0.297695	0.177242	0.386382
ENSG00000138119	MYOF	protein_coding	royalblue	0.344511	0.0848008	-0.0460102	0.82339	0.628642	0.000582848	0.090814	0.659067	0.285674	0.157157
ENSG00000196136	SERPINA3	protein_coding	royalblue	0.342076	0.0871721	0.234694	0.248475	0.811074	5.01952e-07	0.0695057	0.735824	0.232572	0.252903
ENSG00000230612	AC004039.1	lncRNA	royalblue	0.342009	0.0872379	0.229224	0.25999	0.578582	0.00195879	0.435923	0.0260042	-0.152275	0.457717
ENSG00000232480	TGFB2-AS1	lncRNA	royalblue	0.341156	0.0880811	0.274032	0.175521	0.861246	1.62608e-08	0.0884111	0.667573	-0.0707046	0.731431
ENSG00000280054	AC004241.5	TEC	royalblue	0.339592	0.0896421	-0.0857117	0.677177	0.688667	0.000100358	0.155681	0.447598	-0.138059	0.501217
ENSG00000196924	FLNA	protein_coding	royalblue	0.336252	0.0930466	0.211455	0.299749	0.597627	0.00126421	0.355219	0.0749481	0.305689	0.128844
ENSG00000138495	COX17	protein_coding	royalblue	-0.335619	0.093702	-0.335079	0.0942652	-0.520264	0.00643865	-0.299494	0.137177	-0.18644	0.361802
ENSG00000131437	KIF3A	protein_coding	royalblue	0.327852	0.102036	0.369213	0.0634195	0.684235	0.000115864	0.242018	0.233586	-0.0895122	0.66367
ENSG00000204904	LINC01545	lncRNA	royalblue	0.327331	0.102614	-0.0455204	0.825242	0.765043	5.31348e-06	0.101554	0.621561	0.128332	0.532118
ENSG00000253250	C8orf88	protein_coding	royalblue	0.323924	0.106455	0.0333652	0.871458	0.869088	8.43916e-09	0.00580392	0.977551	0.0701411	0.733494
ENSG00000253771	TPTE2P1	transcribed_unprocessed_pseudogene	royalblue	0.32243	0.108173	0.292301	0.147334	0.567908	0.00247542	0.328701	0.101099	-0.150051	0.464388
ENSG00000136918	WDR38	protein_coding	royalblue	0.320358	0.110589	-0.0750415	0.715609	0.760411	6.54275e-06	0.177191	0.386521	-0.0715599	0.728302
ENSG00000228816	AK3P5	processed_pseudogene	royalblue	0.314931	0.117105	0.0499711	0.808452	0.689802	9.66952e-05	0.0810228	0.693975	0.464057	0.0169372
ENSG00000170425	ADORA2B	protein_coding	royalblue	0.314675	0.117419	-0.00828078	0.967975	0.667621	0.000194396	0.177662	0.385239	0.327649	0.102261
ENSG00000080709	KCNN2	protein_coding	royalblue	0.313548	0.11881	0.124616	0.544156	0.820558	2.85082e-07	-0.00368647	0.98574	-0.0164912	0.93627
ENSG00000262884	AC015921.1	lncRNA	royalblue	0.313293	0.119126	-0.0112412	0.956535	0.817817	3.36842e-07	-0.0464725	0.821643	-0.14444	0.48144
ENSG00000064763	FAR2	protein_coding	royalblue	0.310501	0.12263	-0.0155537	0.939887	0.674716	0.000156467	-0.151135	0.461128	0.269066	0.183794
ENSG00000111666	CHPT1	protein_coding	royalblue	0.309831	0.123482	0.109057	0.595888	0.551503	0.00349497	-0.0980398	0.633739	0.408095	0.0384869
ENSG00000038382	TRIO	protein_coding	royalblue	0.307608	0.126339	0.138598	0.499533	0.442466	0.0236073	0.556509	0.00315167	0.0776548	0.706129
ENSG00000124251	TP53TG5	protein_coding	royalblue	0.304909	0.129873	0.251242	0.215695	0.50525	0.00846827	0.166867	0.415216	0.0143298	0.944609
ENSG00000138448	ITGAV	protein_coding	royalblue	0.303663	0.131528	0.121259	0.555139	0.634857	0.000494123	-0.0586423	0.775984	0.34622	0.0831654
ENSG00000157168	NRG1	protein_coding	royalblue	0.302418	0.133198	0.142233	0.488237	0.407793	0.0386448	0.530115	0.0053431	0.0441223	0.830532
ENSG00000174233	ADCY6	protein_coding	royalblue	0.299657	0.136954	0.315463	0.116453	0.414815	0.0351073	0.269631	0.182839	-0.0118842	0.954052
ENSG00000173218	VANGL1	protein_coding	royalblue	0.294014	0.144868	0.0864322	0.674609	0.681826	0.000125145	0.0751319	0.71528	0.246618	0.224544
ENSG00000256043	CTSO	protein_coding	royalblue	0.292808	0.146601	0.0771282	0.708036	0.666946	0.000198396	0.107415	0.601468	-0.1419	0.489267
ENSG00000066557	LRRC40	protein_coding	royalblue	0.289824	0.150952	0.385933	0.0514994	0.581633	0.00182935	-0.214001	0.293833	0.220541	0.278971
ENSG00000196670	ZFP62	protein_coding	royalblue	0.286561	0.155816	0.406516	0.0393175	0.574506	0.00214395	0.25287	0.212636	0.0831018	0.686509
ENSG00000168412	MTNR1A	protein_coding	royalblue	0.285552	0.157342	0.0867265	0.67356	0.405206	0.0400172	0.564049	0.0026889	0.103965	0.613265
ENSG00000279375	AC244517.7	lncRNA	royalblue	0.285318	0.157698	0.0114273	0.955816	0.639003	0.000441701	0.196006	0.337238	0.236075	0.245621
ENSG00000169991	IFFO2	protein_coding	royalblue	0.283507	0.160467	0.0338179	0.869728	0.572936	0.00221915	0.371958	0.0613289	-0.150563	0.462847
ENSG00000154127	UBASH3B	protein_coding	royalblue	0.279848	0.166168	-0.127752	0.533988	0.739332	1.59645e-05	0.400087	0.0428465	0.14648	0.475204
ENSG00000169302	STK32A	protein_coding	royalblue	0.273324	0.176684	0.0373646	0.856198	0.720145	3.35331e-05	-0.00590087	0.977176	-0.108515	0.597729
ENSG00000117020	AKT3	protein_coding	royalblue	0.271701	0.179372	0.0814847	0.692314	0.605881	0.00103677	0.125384	0.541657	0.236062	0.245647
ENSG00000092969	TGFB2	protein_coding	royalblue	0.27084	0.180809	0.341624	0.0876173	0.775464	3.26921e-06	0.195715	0.33797	-0.139674	0.496176
ENSG00000256870	SLC5A8	protein_coding	royalblue	0.270795	0.180884	0.0288472	0.888749	0.670806	0.000176473	-0.00871721	0.966288	-0.116984	0.569271
ENSG00000255176	AP000941.1	lncRNA	royalblue	0.265642	0.189652	0.347363	0.0820853	0.529123	0.00544576	0.233779	0.250377	0.0974946	0.635636
ENSG00000185483	ROR1	protein_coding	royalblue	0.263309	0.193716	0.0399654	0.846302	0.653438	0.000295061	-0.0627695	0.760654	0.319641	0.111434
ENSG00000273038	AL365203.2	lncRNA	royalblue	0.263286	0.193757	0.0153979	0.940488	0.514601	0.00714994	0.356938	0.0734509	0.192143	0.347033
ENSG00000084636	COL16A1	protein_coding	royalblue	0.261757	0.196453	0.140175	0.494616	0.527123	0.00565775	0.0514788	0.802783	-0.158137	0.440375
ENSG00000133641	C12orf29	protein_coding	royalblue	0.260271	0.199099	0.19339	0.343853	0.511865	0.00751652	-0.104266	0.61223	0.174781	0.393115
ENSG00000246130	AC107959.2	lncRNA	royalblue	0.256354	0.206187	0.058089	0.778045	0.794771	1.23808e-06	-0.061237	0.766336	0.17544	0.391305
ENSG00000147724	FAM135B	protein_coding	royalblue	0.255966	0.206899	0.179286	0.380837	0.802921	7.96613e-07	-0.0653316	0.751181	0.218138	0.284374
ENSG00000281789	NA	NA	royalblue	0.254589	0.209437	0.285119	0.158001	0.32843	0.101398	0.330694	0.0989248	0.15641	0.445446
ENSG00000221916	C19orf73	protein_coding	royalblue	-0.249397	0.219196	-0.269902	0.182383	-0.421727	0.0318823	0.0476117	0.817343	-0.188863	0.355481
ENSG00000145908	ZNF300	protein_coding	royalblue	0.245929	0.225885	-0.0230247	0.911106	0.348084	0.0814095	0.4752	0.0141543	-0.064857	0.752933
ENSG00000184304	PRKD1	protein_coding	royalblue	0.245389	0.226936	0.267326	0.186755	0.543216	0.00413327	0.206047	0.312564	-0.157192	0.443147
ENSG00000132763	MMACHC	protein_coding	royalblue	0.243184	0.231272	0.35854	0.0720773	0.475142	0.0141678	-0.123168	0.548882	0.264863	0.191003
ENSG00000234231	AC093616.1	unprocessed_pseudogene	royalblue	0.243021	0.231594	0.0526455	0.798403	0.449379	0.0212729	0.181876	0.373879	0.383976	0.0527959
ENSG00000272070	AC005618.1	lncRNA	royalblue	0.2386	0.240459	0.0459131	0.823757	0.674517	0.000157435	0.410279	0.0373611	0.0443237	0.829769
ENSG00000204956	PCDHGA1	protein_coding	royalblue	0.231673	0.254793	-0.0666827	0.7462	0.527643	0.00560203	0.472304	0.0148384	0.207766	0.308454
ENSG00000094755	GABRP	protein_coding	royalblue	0.231529	0.255097	-0.0366315	0.858992	0.848487	4.36083e-08	0.00271369	0.989503	-0.0136591	0.947198
ENSG00000235947	EGOT	lncRNA	royalblue	0.229462	0.259482	0.059503	0.77278	0.648734	0.000337288	0.0400767	0.845879	0.142551	0.487256
ENSG00000124225	PMEPA1	protein_coding	royalblue	0.224025	0.271251	-0.0309981	0.88051	0.706741	5.44031e-05	0.295938	0.142134	0.0105267	0.959296
ENSG00000123119	NECAB1	protein_coding	royalblue	0.222399	0.274836	0.0996524	0.628139	0.673763	0.000161154	0.00337974	0.986927	0.00813592	0.968535
ENSG00000129151	BBOX1	protein_coding	royalblue	0.220314	0.279478	0.0859901	0.676184	0.713757	4.23716e-05	0.169719	0.407174	0.0194634	0.924814
ENSG00000079739	PGM1	protein_coding	royalblue	0.217829	0.285073	0.14579	0.477309	0.444917	0.022757	0.0541914	0.792607	0.372401	0.060996
ENSG00000235721	AC013268.3	processed_pseudogene	royalblue	0.21763	0.285526	0.292357	0.147253	0.563953	0.00269442	-0.080744	0.694978	0.239852	0.237927
ENSG00000204764	RANBP17	protein_coding	royalblue	0.208903	0.305755	0.0616808	0.76469	0.833542	1.243e-07	-0.0318869	0.87711	0.049788	0.809141
ENSG00000244144	AC128688.1	processed_pseudogene	royalblue	0.20832	0.307138	-0.00544591	0.978936	0.502679	0.00886455	0.544233	0.00404995	-0.0122924	0.952475
ENSG00000197249	SERPINA1	protein_coding	royalblue	0.207611	0.308824	0.007007	0.9729	0.637698	0.00045766	0.356901	0.073483	-0.047999	0.815882
ENSG00000237523	LINC00857	lncRNA	royalblue	0.206318	0.311915	0.263953	0.192589	0.523169	0.00609758	0.267776	0.185985	-0.162428	0.427908
ENSG00000142949	PTPRF	protein_coding	royalblue	0.204286	0.316809	0.0734395	0.72144	0.739819	1.56536e-05	0.066558	0.746659	0.0915477	0.656478
ENSG00000184867	ARMCX2	protein_coding	royalblue	0.203679	0.31828	0.225913	0.267126	0.408593	0.0382278	-0.0497194	0.8094	0.48702	0.0116263
ENSG00000259717	LINC00677	lncRNA	royalblue	0.196005	0.337241	0.13692	0.50479	0.58766	0.0015951	0.0527969	0.797835	0.114561	0.57735
ENSG00000162636	FAM102B	protein_coding	royalblue	0.192847	0.345235	0.198526	0.330938	0.54668	0.00385534	0.049096	0.811747	-0.119658	0.560412
ENSG00000221890	NPTXR	protein_coding	royalblue	0.187346	0.359431	0.228321	0.261924	0.485767	0.0118751	-0.122586	0.550785	-0.112814	0.583207
ENSG00000010803	SCMH1	protein_coding	royalblue	0.187267	0.359638	0.137641	0.502525	0.55229	0.00343901	-0.159736	0.435707	-0.0868885	0.672984
ENSG00000155850	SLC26A2	protein_coding	royalblue	0.182267	0.372836	0.0121132	0.953168	0.549811	0.003618	0.0671094	0.744629	0.357629	0.0728563
ENSG00000248449	PCDHGB8P	transcribed_unitary_pseudogene	royalblue	0.182212	0.372983	-0.135778	0.508384	0.524166	0.00598405	0.074649	0.717036	0.310143	0.123084
ENSG00000253525	AC104966.1	processed_pseudogene	royalblue	0.179926	0.379111	-0.00805517	0.968847	0.84429	5.91633e-08	0.106517	0.604529	0.00726333	0.971909
ENSG00000150093	ITGB1	protein_coding	royalblue	0.179014	0.381572	-0.0226586	0.912514	0.694501	8.27528e-05	0.134472	0.512506	0.061481	0.765431
ENSG00000261060	AL160286.2	lncRNA	royalblue	0.17551	0.391113	0.603062	0.00111011	0.385664	0.0516758	-0.0823028	0.689375	0.101806	0.620693
ENSG00000172819	RARG	protein_coding	royalblue	0.175286	0.391727	0.230429	0.257424	0.608492	0.000972622	0.12691	0.53671	-0.20452	0.316243
ENSG00000140575	IQGAP1	protein_coding	royalblue	0.172496	0.399427	-0.017207	0.93351	0.328889	0.100893	-0.109847	0.593212	0.3357	0.0936182
ENSG00000159167	STC1	protein_coding	royalblue	0.1714	0.402473	0.0781523	0.704329	0.685967	0.00010957	0.0309662	0.880633	-0.0958694	0.641306
ENSG00000162378	ZYG11B	protein_coding	royalblue	0.170645	0.404581	0.255915	0.206992	0.619465	0.000739112	-0.07723	0.707667	0.012157	0.952998
ENSG00000029153	ARNTL2	protein_coding	royalblue	0.168538	0.410492	0.348311	0.0811977	0.580632	0.00187102	0.0853833	0.678349	0.103515	0.61481
ENSG00000123977	DAW1	protein_coding	royalblue	0.168531	0.410513	0.0500515	0.80815	0.54053	0.00436028	0.0403198	0.844955	-0.118827	0.563159
ENSG00000154930	ACSS1	protein_coding	royalblue	-0.167931	0.412207	0.0248306	0.904164	-0.47727	0.0136815	-0.209201	0.30505	0.0300269	0.884229
ENSG00000231298	LINC00704	lncRNA	royalblue	0.166835	0.415308	-0.0557589	0.786743	0.486557	0.0117178	0.160055	0.43478	-0.0616366	0.764853
ENSG00000170858	LILRP2	transcribed_processed_pseudogene	royalblue	0.156291	0.445796	-0.0661602	0.748125	0.640903	0.000419346	-0.0865107	0.674329	-0.0788796	0.701701
ENSG00000228412	AL022068.1	lncRNA	royalblue	0.154404	0.451377	-0.0966649	0.638528	0.593302	0.00139968	-0.0398712	0.84666	-0.15644	0.445358
ENSG00000104723	TUSC3	protein_coding	royalblue	0.146011	0.476636	-0.00384647	0.985121	0.76378	5.62638e-06	-0.0537665	0.794199	0.0791552	0.700706
ENSG00000170525	PFKFB3	protein_coding	royalblue	0.145873	0.477055	0.0285943	0.889719	0.548671	0.00370294	0.393171	0.0469179	-0.0240369	0.907214
ENSG00000173334	TRIB1	protein_coding	royalblue	0.14398	0.482854	-0.114158	0.5787	0.714567	4.11475e-05	-0.0415574	0.840255	-0.182534	0.372125
ENSG00000160471	COX6B2	protein_coding	royalblue	0.135702	0.508623	0.00452573	0.982494	0.650909	0.000317151	-0.0527137	0.798147	-0.0595302	0.772678
ENSG00000256797	KLRF2	protein_coding	royalblue	0.130792	0.524218	-0.100699	0.624515	0.551125	0.00352215	-0.0549948	0.7896	-0.0683661	0.740007
ENSG00000176907	TCIM	protein_coding	royalblue	0.116053	0.57237	0.0778874	0.705288	0.800792	8.95583e-07	0.017914	0.930784	-0.150185	0.463983
ENSG00000253213	AC010306.1	processed_pseudogene	royalblue	0.112804	0.583241	-0.0232635	0.910187	0.831663	1.40768e-07	-0.0102111	0.960515	-0.0510667	0.804332
ENSG00000254340	AC022784.7	lncRNA	royalblue	0.112765	0.583371	-0.108791	0.596791	0.553273	0.00337011	0.266292	0.18853	0.0786655	0.702474
ENSG00000145687	SSBP2	protein_coding	royalblue	0.108038	0.599348	-0.0648136	0.753093	0.65755	0.000262017	-0.0295828	0.88593	-0.0151354	0.941501
ENSG00000237413	MGC27382	lncRNA	royalblue	0.102367	0.61876	0.344922	0.0844049	0.465481	0.0165585	0.119992	0.559311	-0.002019	0.99219
ENSG00000188001	TPRG1	protein_coding	royalblue	0.0990393	0.630266	0.148582	0.468822	0.579275	0.00192872	-0.175894	0.39006	-0.0982651	0.632955
ENSG00000196458	ZNF605	protein_coding	royalblue	0.0987194	0.631376	0.295447	0.142828	0.485162	0.011997	0.237484	0.242732	-0.0101606	0.96071
ENSG00000205403	CFI	protein_coding	royalblue	0.0970499	0.637186	0.173581	0.396422	0.602971	0.00111253	-0.0858014	0.676857	0.0489499	0.812298
ENSG00000270021	AC026691.1	lncRNA	royalblue	0.09104	0.658269	-0.0255336	0.901463	0.475242	0.0141448	-0.0212912	0.917775	0.410519	0.0372392
ENSG00000135486	HNRNPA1	protein_coding	royalblue	0.0848697	0.680182	0.179059	0.381452	0.549768	0.0036212	0.0581327	0.777882	-0.152424	0.457272
ENSG00000173281	PPP1R3B	protein_coding	royalblue	0.083743	0.684212	-0.0664072	0.747215	0.545772	0.0039266	0.147137	0.473205	0.307235	0.126824
ENSG00000168495	POLR3D	protein_coding	royalblue	0.0834948	0.685101	-0.0329827	0.872919	0.562515	0.002778	0.114498	0.577561	0.173882	0.39559
ENSG00000240602	AADACP1	transcribed_unprocessed_pseudogene	royalblue	0.0711976	0.729627	-0.0104211	0.959704	0.688945	9.94499e-05	-0.0556858	0.787016	0.034039	0.868883
ENSG00000251320	AC011352.3	lncRNA	royalblue	0.0668021	0.74576	-0.0352163	0.864389	0.811158	4.99517e-07	0.0161048	0.93776	-0.0134912	0.947846
ENSG00000162490	DRAXIN	protein_coding	royalblue	-0.06178	0.764321	-0.0399425	0.846389	0.5596	0.00295432	-0.112565	0.584044	-0.105983	0.606353
ENSG00000178776	C5orf46	protein_coding	royalblue	-0.037504	0.855667	-0.0285692	0.889815	0.717918	3.64081e-05	-0.0130415	0.949582	-0.0306907	0.881687
ENSG00000113300	CNOT6	protein_coding	royalblue	0.0359445	0.861611	0.03041	0.882762	0.360738	0.070224	0.0685234	0.739429	-0.0534138	0.795521
ENSG00000248538	AC022784.1	lncRNA	royalblue	0.0339266	0.869313	-0.0471445	0.819106	0.694035	8.40524e-05	0.0145447	0.94378	-0.000791989	0.996936
ENSG00000167291	TBC1D16	protein_coding	royalblue	0.0260306	0.899555	0.136491	0.506139	0.448595	0.0215279	0.114257	0.578367	0.0278463	0.892587
ENSG00000064042	LIMCH1	protein_coding	royalblue	-0.0154392	0.940328	-0.0886741	0.66664	0.460079	0.0180333	-0.0556809	0.787034	-0.128607	0.53123
ENSG00000248362	AC011352.1	lncRNA	royalblue	0.00889467	0.965603	-0.0607873	0.768006	0.709859	4.87256e-05	0.00864728	0.966559	-0.0157657	0.939069
ENSG00000255778	NA	NA	royalblue	-0.00791938	0.969372	-0.00759672	0.97062	0.624558	0.00064843	-0.0318942	0.877081	-0.106818	0.603503
ENSG00000184619	KRBA2	protein_coding	red	0.643933	0.000385737	0.311222	0.121718	0.549803	0.0036186	0.313556	0.1188	0.440341	0.0243651
ENSG00000227825	SLC9A7P1	transcribed_processed_pseudogene	red	0.561237	0.0028542	0.30883	0.124763	0.451479	0.0206023	0.270703	0.181037	0.412508	0.0362396
ENSG00000280328	NA	NA	red	0.541694	0.00426063	0.620733	0.000715569	0.233726	0.250487	0.197161	0.334342	0.453972	0.0198288
ENSG00000173040	EVC2	protein_coding	red	0.485785	0.0118716	0.335956	0.0933526	0.40863	0.0382087	0.211634	0.29933	0.564768	0.00264795
ENSG00000230454	U73166.1	lncRNA	red	0.472733	0.0147355	0.294157	0.144663	0.131034	0.523443	0.219973	0.280241	0.542861	0.00416268
ENSG00000253190	AC084082.1	lncRNA	red	0.463412	0.0171112	0.282996	0.161254	0.452027	0.0204303	0.0820831	0.690164	0.0753403	0.714523
ENSG00000197879	MYO1C	protein_coding	red	0.45707	0.0189005	0.214056	0.293704	0.395296	0.0456362	0.348821	0.0807234	0.53328	0.00502642
ENSG00000136449	MYCBPAP	protein_coding	red	0.444997	0.0227298	0.253036	0.212325	0.170809	0.404122	0.357255	0.0731775	0.461611	0.0176045
ENSG00000215374	FAM66B	lncRNA	red	0.442443	0.0236153	-0.0115247	0.95544	0.369368	0.0633002	0.219795	0.280641	0.364937	0.0667858
ENSG00000065989	PDE4A	protein_coding	red	0.437089	0.025563	0.295899	0.142188	0.276472	0.171554	0.029729	0.88537	0.570557	0.00233745
ENSG00000167637	ZNF283	protein_coding	red	0.409033	0.0380001	0.267567	0.186342	0.395203	0.0456916	0.332668	0.0968067	0.109155	0.595555
ENSG00000167595	PROSER3	protein_coding	red	0.407409	0.038846	0.458534	0.0184746	0.367978	0.0643782	0.215258	0.290937	0.156321	0.44571
ENSG00000226121	AC009487.2	processed_pseudogene	red	0.403409	0.040993	-0.00610967	0.976369	0.492098	0.0106619	-0.164793	0.421122	0.429437	0.0285706
ENSG00000274750	HIST1H3E	protein_coding	red	0.399118	0.0433996	0.0385743	0.851593	0.286738	0.155549	0.519237	0.00656308	0.00437309	0.983085
ENSG00000067369	TP53BP1	protein_coding	red	0.398219	0.0439179	0.316351	0.115373	0.342592	0.0866649	0.182033	0.37346	0.318181	0.113169
ENSG00000255052	FAM66D	lncRNA	red	0.396487	0.0449294	0.0149157	0.942348	0.416644	0.0342295	0.0703983	0.732552	0.579035	0.0019391
ENSG00000241129	AC093719.1	transcribed_processed_pseudogene	red	0.38542	0.0518368	0.542914	0.00415825	0.219206	0.281964	0.169961	0.406494	-0.00172219	0.993338
ENSG00000111077	TNS2	protein_coding	red	0.38531	0.0519092	0.0253748	0.902073	0.209089	0.305316	-0.0186451	0.927967	0.271571	0.179588
ENSG00000182013	PNMA8A	protein_coding	red	0.381338	0.0545844	0.00818131	0.96836	0.228041	0.262527	0.0965777	0.638832	0.467134	0.0161275
ENSG00000203327	AC012358.1	lncRNA	red	0.381293	0.0546152	0.299784	0.13678	0.13845	0.499995	0.0724566	0.725026	0.138348	0.500313
ENSG00000112118	MCM3	protein_coding	red	0.37611	0.0582681	0.291817	0.148035	0.131478	0.522025	0.107128	0.602445	0.449541	0.0212207
ENSG00000186481	ANKRD20A5P	transcribed_unprocessed_pseudogene	red	0.363492	0.067954	0.440508	0.0243048	0.39311	0.0469553	0.332834	0.0966296	0.167663	0.412963
ENSG00000140459	CYP11A1	protein_coding	red	0.356532	0.0738028	0.14716	0.473135	0.0911288	0.657956	-0.0839622	0.683427	0.581407	0.00183868
ENSG00000228126	FALEC	lncRNA	red	0.356417	0.0739021	0.55541	0.00322441	0.16348	0.424882	0.0474639	0.8179	0.012421	0.951979
ENSG00000262050	AC005696.1	lncRNA	red	0.354897	0.0752307	0.0875369	0.670678	-0.0128725	0.950235	0.0680426	0.741196	0.553852	0.00333007
ENSG00000185070	FLRT2	protein_coding	red	0.352798	0.0770953	0.0635864	0.75763	0.419704	0.0328008	0.149469	0.466142	-0.0837683	0.684121
ENSG00000146426	TIAM2	protein_coding	red	0.349905	0.079722	0.53379	0.00497688	0.260535	0.198628	0.122787	0.550127	-0.19171	0.348142
ENSG00000169118	CSNK1G1	protein_coding	red	0.347388	0.0820617	0.189253	0.354472	0.427913	0.0292021	0.204989	0.31511	0.39706	0.044593
ENSG00000255650	FAM222A-AS1	lncRNA	red	0.346663	0.0827454	0.060351	0.769627	-0.0242959	0.906219	0.299791	0.13677	0.425919	0.0300454
ENSG00000171135	JAGN1	protein_coding	red	-0.345114	0.0842206	-0.34024	0.088993	-0.381226	0.0546612	-0.140319	0.494168	-0.345579	0.083776
ENSG00000259674	AC092868.1	processed_pseudogene	red	0.342162	0.0870869	0.134504	0.512407	0.271915	0.179015	0.0716627	0.727926	0.270306	0.181704
ENSG00000111371	SLC38A1	protein_coding	red	0.338547	0.0906973	0.0561073	0.785441	0.600367	0.00118436	0.280927	0.164473	0.409764	0.0376242
ENSG00000277984	AP001264.1	unprocessed_pseudogene	red	0.337187	0.0920835	0.266018	0.189002	0.122631	0.550638	0.20449	0.316315	-0.0291588	0.887555
ENSG00000108557	RAI1	protein_coding	red	0.336998	0.092278	0.156132	0.446265	0.253999	0.210532	0.0970142	0.63731	0.380462	0.0551885
ENSG00000143153	ATP1B1	protein_coding	red	0.335211	0.0941272	0.20765	0.30873	-0.0159423	0.938387	-0.0569181	0.782413	0.492076	0.0106659
ENSG00000168502	MTCL1	protein_coding	red	0.330504	0.0991304	0.0124889	0.951716	0.196245	0.336637	0.187961	0.357826	0.369597	0.0631242
ENSG00000100321	SYNGR1	protein_coding	red	0.329046	0.100721	0.130275	0.525873	0.225136	0.26882	-0.0731091	0.722645	0.194976	0.339833
ENSG00000226306	NPY6R	transcribed_processed_pseudogene	red	0.328431	0.101397	-0.123622	0.547397	0.0120518	0.953405	-0.0203566	0.921374	0.413217	0.0358885
ENSG00000205864	KRTAP5-6	protein_coding	red	0.326219	0.103857	0.411777	0.0366045	0.0431909	0.83406	0.0168586	0.934853	-0.0179659	0.930584
ENSG00000012504	NR1H4	protein_coding	red	0.325293	0.104899	0.0145092	0.943917	0.437683	0.0253407	-0.0715798	0.728229	0.091479	0.65672
ENSG00000273419	AC004877.1	lncRNA	red	0.322905	0.107624	0.343884	0.0854061	0.155447	0.448288	0.137468	0.503067	0.178596	0.382703
ENSG00000165046	LETM2	protein_coding	red	0.322716	0.107842	-0.0406831	0.843575	0.131396	0.522286	0.101231	0.622677	0.562267	0.00279269
ENSG00000253476	AC091185.1	lncRNA	red	0.321388	0.109382	0.258455	0.202364	0.262631	0.194909	0.0945048	0.646082	0.173824	0.395752
ENSG00000258285	TESC-AS1	lncRNA	red	0.318471	0.112823	-0.0282023	0.891222	0.570402	0.00234531	-0.0503753	0.806932	0.231853	0.254413
ENSG00000138759	FRAS1	protein_coding	red	0.317554	0.113921	0.238129	0.241416	0.326674	0.103347	0.150752	0.462278	0.0540869	0.792999
ENSG00000237399	PITRM1-AS1	lncRNA	red	0.317486	0.114003	0.222596	0.274399	0.41107	0.0369602	0.165012	0.420495	0.204893	0.315342
ENSG00000256087	ZNF432	protein_coding	red	0.314885	0.117162	0.00324612	0.987443	0.182071	0.373358	0.32334	0.107124	0.308007	0.125822
ENSG00000018408	WWTR1	protein_coding	red	0.314069	0.118165	0.0415169	0.840409	0.422121	0.0317063	-0.0163674	0.936748	0.382221	0.0539807
ENSG00000239665	AL157392.3	lncRNA	red	0.313453	0.118928	0.474607	0.0142922	0.163457	0.424949	0.0959159	0.641143	-0.194408	0.341269
ENSG00000176293	ZNF135	protein_coding	red	-0.313034	0.119448	-0.0644612	0.754395	-0.0740886	0.719076	-0.174379	0.394222	-0.139331	0.497245
ENSG00000258793	AL355102.4	lncRNA	red	0.310989	0.122012	0.0839153	0.683595	0.286306	0.156201	0.222138	0.275416	0.248095	0.221691
ENSG00000261633	AC018552.4	lncRNA	red	0.308176	0.125604	0.101196	0.622799	0.0809478	0.694245	-0.000872563	0.996625	0.386972	0.050821
ENSG00000268747	AC022432.1	processed_pseudogene	red	0.308102	0.1257	0.210219	0.30265	0.303539	0.131694	-0.0165749	0.935947	0.571911	0.00226946
ENSG00000156103	MMP16	protein_coding	red	0.30728	0.126765	0.161849	0.42958	0.229266	0.259902	0.0639445	0.756305	-0.0163679	0.936746
ENSG00000258999	AL136040.1	lncRNA	red	0.307119	0.126973	0.310407	0.122749	0.0478414	0.816476	-0.143915	0.483053	0.292237	0.147426
ENSG00000138600	SPPL2A	protein_coding	red	0.304591	0.130294	0.0630007	0.759798	0.147608	0.471775	-0.0283106	0.890806	0.29152	0.148468
ENSG00000228741	SPATA13	lncRNA	red	0.302274	0.133391	0.0997432	0.627824	0.113428	0.581145	0.241114	0.23539	0.229939	0.258466
ENSG00000166068	SPRED1	protein_coding	red	0.301882	0.133921	0.283918	0.159836	0.439676	0.0246064	0.103129	0.616137	0.00405714	0.984307
ENSG00000207336	RNU6-658P	snRNA	red	0.294467	0.144221	-0.0249586	0.903672	0.0568848	0.782537	0.342734	0.0865263	-0.0653306	0.751185
ENSG00000184661	CDCA2	protein_coding	red	0.294252	0.144528	0.211646	0.299303	0.169095	0.408925	0.10535	0.608518	0.284051	0.159631
ENSG00000261229	AC021483.2	lncRNA	red	0.293865	0.145081	0.111771	0.586717	0.304592	0.130292	0.126706	0.53737	-0.0139914	0.945916
ENSG00000181773	GPR3	protein_coding	red	0.292276	0.14737	0.118911	0.56288	-0.0476312	0.817269	-0.0356127	0.862877	0.0426025	0.83629
ENSG00000170775	GPR37	protein_coding	red	0.290266	0.150303	-0.00921321	0.964371	0.29249	0.147061	-0.181292	0.375442	0.268128	0.185385
ENSG00000198892	SHISA4	protein_coding	red	0.282983	0.161276	0.181904	0.373806	0.340742	0.0884921	0.0949293	0.644595	0.241952	0.233717
ENSG00000239521	GATS	protein_coding	red	-0.281285	0.163913	-0.0641193	0.755659	-0.216237	0.288695	-0.0546949	0.790722	-0.254819	0.209012
ENSG00000143570	SLC39A1	protein_coding	red	0.280994	0.164368	0.300728	0.135488	0.22786	0.262916	0.0764326	0.710557	0.541862	0.00424642
ENSG00000229109	AL137847.1	lncRNA	red	0.27549	0.173143	0.0672843	0.743985	0.484265	0.0121792	0.0536426	0.794664	0.226357	0.266162
ENSG00000244050	DEFB109F	transcribed_unprocessed_pseudogene	red	0.275306	0.173441	-0.0427054	0.8359	0.0474709	0.817874	0.0113164	0.956245	0.0640039	0.756086
ENSG00000119661	DNAL1	protein_coding	red	0.273931	0.175686	0.229062	0.260337	0.492242	0.0106355	0.248818	0.220304	0.034087	0.8687
ENSG00000151474	FRMD4A	protein_coding	red	0.272433	0.178157	0.151914	0.458796	0.235237	0.24735	0.0830725	0.686614	-0.100834	0.624048
ENSG00000126464	PRR12	protein_coding	red	0.271546	0.179629	0.319933	0.111089	0.172422	0.399632	0.0387359	0.850977	-0.0351235	0.864743
ENSG00000140563	MCTP2	protein_coding	red	0.271161	0.180272	-0.0853904	0.678323	0.101103	0.623119	-0.198935	0.329924	0.407973	0.0385507
ENSG00000261273	AC138512.1	lncRNA	red	0.26969	0.18274	0.0594327	0.773041	0.238994	0.23966	-0.0172465	0.933358	0.117773	0.566649
ENSG00000179542	SLITRK4	protein_coding	red	0.269527	0.183014	-0.0355052	0.863287	0.321468	0.10929	-0.0481213	0.815421	0.394602	0.0460514
ENSG00000163945	UVSSA	protein_coding	red	0.268169	0.185316	0.241226	0.235166	0.0620709	0.763243	0.287945	0.15374	0.374556	0.0593993
ENSG00000242419	PCDHGC4	protein_coding	red	0.267251	0.186883	0.00257101	0.990055	0.318162	0.113192	0.326213	0.103864	0.233966	0.249989
ENSG00000143702	CEP170	protein_coding	red	0.26722	0.186935	0.0812257	0.693245	0.340995	0.088241	0.0264829	0.897819	0.322004	0.108667
ENSG00000112992	NNT	protein_coding	red	0.265322	0.190206	-0.124235	0.545396	0.254103	0.210337	0.0175976	0.932004	0.505876	0.00837409
ENSG00000187097	ENTPD5	protein_coding	red	0.263187	0.19393	0.240998	0.235624	0.0644732	0.754351	0.250362	0.217361	-0.0861116	0.675751
ENSG00000169862	CTNND2	protein_coding	red	0.26253	0.195087	0.153923	0.452803	0.380863	0.0549113	0.0668673	0.74552	0.022549	0.912935
ENSG00000109819	PPARGC1A	protein_coding	red	0.260907	0.197964	-0.101351	0.622264	0.0441678	0.83036	-0.0196854	0.923959	0.630983	0.000547925
ENSG00000257327	AC012555.1	lncRNA	red	0.259371	0.200712	-0.0867104	0.673618	0.321797	0.108906	0.0218836	0.915495	0.494127	0.0102955
ENSG00000062370	ZNF112	protein_coding	red	0.256541	0.205846	0.359976	0.0708626	0.348027	0.0814628	0.0994034	0.629002	-0.248494	0.220925
ENSG00000160007	ARHGAP35	protein_coding	red	0.256087	0.206678	0.128851	0.530446	0.201402	0.323837	0.199628	0.328205	-0.0405228	0.844184
ENSG00000272405	AL365181.3	lncRNA	red	0.255612	0.207549	-0.0587051	0.77575	0.310556	0.12256	0.10811	0.599105	0.326121	0.103966
ENSG00000203280	AL022323.1	lncRNA	red	0.252228	0.213837	0.120935	0.556203	0.43573	0.0260775	-0.00292748	0.988676	0.550115	0.00359564
ENSG00000224727	FCF1P7	processed_pseudogene	red	-0.250624	0.216863	0.0253134	0.902309	-0.00628281	0.9757	-0.0935128	0.649562	0.0293353	0.886879
ENSG00000259904	ACTG1P15	processed_pseudogene	red	0.249186	0.2196	0.115469	0.574317	0.156485	0.445227	0.249199	0.219576	-0.0252486	0.902558
ENSG00000237025	AL121601.2	processed_pseudogene	red	0.246893	0.22401	0.0565012	0.783969	0.295448	0.142827	0.205843	0.313054	0.425425	0.0302574
ENSG00000166004	CEP295	protein_coding	red	0.246292	0.225177	0.166305	0.416811	0.44085	0.024182	0.132878	0.517566	0.0257162	0.900762
ENSG00000267265	AC011476.3	lncRNA	red	0.244158	0.22935	0.0736982	0.720497	0.128736	0.530816	0.0666266	0.746406	0.00291624	0.988719
ENSG00000135749	PCNX2	protein_coding	red	0.244111	0.229443	0.132353	0.519234	0.243679	0.230295	0.120601	0.557302	0.168169	0.411533
ENSG00000237073	AL162727.2	lncRNA	red	0.243374	0.230896	0.199532	0.328445	0.329062	0.100703	0.0460611	0.823198	0.0225398	0.912971
ENSG00000268670	AC016586.1	lncRNA	red	0.242931	0.231773	0.292179	0.14751	0.185534	0.364181	0.306095	0.128311	-0.122548	0.550911
ENSG00000173065	FAM222B	protein_coding	red	0.239737	0.238157	-0.00499261	0.980689	0.466295	0.016345	0.253926	0.210666	0.230468	0.257342
ENSG00000100739	BDKRB1	protein_coding	red	0.239369	0.238902	0.112016	0.58589	0.229904	0.25854	0.20791	0.308112	0.145832	0.477181
ENSG00000254154	AL359075.2	lncRNA	red	0.238512	0.240637	0.29106	0.149138	0.19381	0.342786	0.0339747	0.869129	0.320404	0.110534
ENSG00000279187	AC027601.5	TEC	red	0.238512	0.240639	0.191112	0.349677	0.16474	0.421272	0.148983	0.467608	0.469271	0.0155838
ENSG00000279949	AC022784.8	lncRNA	red	0.238181	0.24131	0.0476481	0.817206	0.406666	0.0392376	0.161232	0.431363	0.293956	0.144951
ENSG00000054282	SDCCAG8	protein_coding	red	0.236711	0.244315	0.0518139	0.801524	0.269251	0.18348	-0.0290564	0.887948	0.408917	0.0380599
ENSG00000229953	AL590666.2	lncRNA	red	0.236414	0.244924	-0.0376232	0.855213	0.388281	0.0499762	0.0458643	0.823942	0.248625	0.220674
ENSG00000260285	AL133367.1	lncRNA	red	0.235316	0.247188	0.16674	0.415576	0.0418664	0.839083	0.105636	0.607539	0.0635344	0.757822
ENSG00000120341	SEC16B	protein_coding	red	0.231231	0.255727	0.254892	0.208876	-0.031367	0.879099	0.178803	0.382144	0.330206	0.0994541
ENSG00000198435	NRARP	protein_coding	red	0.221261	0.277364	0.0120669	0.953346	0.298883	0.138021	0.125876	0.540059	0.13217	0.519818
ENSG00000114541	FRMD4B	protein_coding	red	0.221177	0.277551	0.151055	0.461369	0.198886	0.330044	-0.123489	0.547833	-0.0956136	0.6422
ENSG00000175556	LONRF3	protein_coding	red	0.221103	0.277717	0.182905	0.371137	0.124815	0.543506	-0.176802	0.387579	0.421009	0.032206
ENSG00000249526	AC008667.1	lncRNA	red	0.220481	0.279104	-0.00114224	0.995581	0.108951	0.596248	0.0749578	0.715913	0.492709	0.0105503
ENSG00000279771	AP000997.3	TEC	red	0.220236	0.279652	-0.0371038	0.857192	0.522534	0.00617076	-0.0336601	0.870331	0.474318	0.01436
ENSG00000253616	AC107959.3	lncRNA	red	0.218168	0.284307	-0.113234	0.581797	0.419155	0.0330536	0.0823222	0.689305	0.395503	0.0455126
ENSG00000267201	LINC01775	lncRNA	red	0.207533	0.30901	0.131348	0.522442	-0.0343098	0.867849	0.022016	0.914986	0.0579047	0.778732
ENSG00000167562	ZNF701	protein_coding	red	0.207156	0.309909	-0.113435	0.581123	0.161885	0.429474	0.117253	0.568376	0.319096	0.11208
ENSG00000279419	AC004925.1	TEC	red	0.206802	0.310756	-0.0487477	0.813059	0.0702087	0.733247	-0.167614	0.413101	0.410121	0.0374418
ENSG00000267886	AC074135.1	lncRNA	red	-0.205193	0.314619	-0.0635767	0.757666	0.0778914	0.705273	-0.136356	0.506562	-0.02311	0.910778
ENSG00000226101	LINC02097	lncRNA	red	0.202127	0.32206	0.213981	0.293877	0.307133	0.126956	0.19599	0.337277	-0.00912034	0.96473
ENSG00000215447	BX322557.1	lncRNA	red	0.200945	0.324958	0.0501204	0.80789	0.142265	0.488136	0.071173	0.729716	0.248753	0.220428
ENSG00000230982	DSTNP1	processed_pseudogene	red	0.200508	0.326033	0.163876	0.423745	0.091164	0.657831	0.338794	0.0904474	0.0819534	0.69063
ENSG00000105738	SIPA1L3	protein_coding	red	0.200053	0.327155	0.187686	0.358543	0.111434	0.587851	0.031362	0.879118	0.179751	0.379583
ENSG00000273901	AC012313.9	lncRNA	red	0.198552	0.330874	0.0666048	0.746487	0.0777959	0.705619	0.237633	0.242427	-0.104499	0.611433
ENSG00000119283	TRIM67	protein_coding	red	0.197598	0.333249	-0.0304321	0.882677	0.160136	0.434544	-0.0511889	0.803872	-0.00413091	0.984021
ENSG00000268549	NA	NA	red	0.196239	0.336653	0.0198923	0.923162	0.18176	0.37419	0.0148739	0.94251	-0.0279879	0.892044
ENSG00000123836	PFKFB2	protein_coding	red	0.195159	0.339371	0.318197	0.11315	-0.0501518	0.807772	-0.147821	0.471126	0.198947	0.329893
ENSG00000258603	AC005225.2	lncRNA	red	0.194303	0.341535	0.00532712	0.979395	0.124456	0.544676	0.0837456	0.684203	0.200357	0.326406
ENSG00000278949	AC127070.5	TEC	red	0.194148	0.341929	0.267068	0.187196	0.332443	0.0970464	0.0681168	0.740923	-0.0700579	0.733799
ENSG00000265046	AC004253.2	lncRNA	red	0.192738	0.345515	0.143503	0.48432	0.191706	0.348152	0.130674	0.524597	0.119849	0.559781
ENSG00000074964	ARHGEF10L	protein_coding	red	0.188866	0.355475	-0.115287	0.574925	0.154207	0.45196	0.0265788	0.89745	0.429341	0.02861
ENSG00000136944	LMX1B	protein_coding	red	0.188671	0.355981	-0.0121813	0.952904	0.119892	0.559639	-0.133147	0.516709	0.0943497	0.646625
ENSG00000215241	LINC02449	lncRNA	red	0.188109	0.357441	0.254278	0.210012	0.131112	0.523195	-0.0295373	0.886105	0.052829	0.797714
ENSG00000249201	CTD-3080P12.3	lncRNA	red	0.186635	0.361291	0.106991	0.602913	-0.0593724	0.773266	0.0313118	0.87931	-0.0243998	0.905819
ENSG00000116141	MARK1	protein_coding	red	0.186564	0.361476	0.0305785	0.882117	0.0647261	0.753417	-0.0300818	0.884019	0.324504	0.105794
ENSG00000275343	AC010999.1	lncRNA	red	0.184351	0.367302	-0.0178871	0.930888	0.156873	0.444082	0.204743	0.315705	0.530056	0.00534912
ENSG00000237172	B3GNT9	protein_coding	red	0.183736	0.36893	-0.0625838	0.761342	0.00120596	0.995335	0.282076	0.16268	-0.0467872	0.820455
ENSG00000122729	ACO1	protein_coding	red	0.182261	0.372852	-0.106085	0.606005	0.154633	0.450698	-0.131895	0.520694	0.348784	0.0807582
ENSG00000005700	IBTK	protein_coding	red	-0.181992	0.373571	-0.155021	0.449547	-0.0196493	0.924098	-0.00447413	0.982694	0.139776	0.495856
ENSG00000088992	TESC	protein_coding	red	0.181042	0.376114	-0.0101775	0.960645	0.408033	0.0385194	-0.012094	0.953242	0.29584	0.142272
ENSG00000227076	AL158166.1	lncRNA	red	0.180424	0.37777	-0.105697	0.60733	0.501284	0.00908594	-0.0522027	0.800064	0.0654895	0.750598
ENSG00000152127	MGAT5	protein_coding	red	-0.178031	0.384235	-0.237117	0.243483	-0.0741674	0.718789	-0.183124	0.370554	0.0801543	0.697103
ENSG00000246145	RRS1-AS1	lncRNA	red	0.177177	0.386556	-0.0443694	0.829596	0.135123	0.51045	-0.0546523	0.790882	0.219312	0.281727
ENSG00000104228	TRIM35	protein_coding	red	0.17684	0.387475	-0.0425112	0.836636	0.300266	0.136119	0.252675	0.212999	0.383857	0.0528757
ENSG00000089091	DZANK1	protein_coding	red	0.176384	0.388719	0.390703	0.0484428	0.159997	0.434947	0.168433	0.410789	0.0739652	0.719525
ENSG00000104691	UBXN8	protein_coding	red	0.176118	0.389447	0.0452176	0.826387	0.521144	0.00633364	0.0859335	0.676386	0.154857	0.450035
ENSG00000261175	LINC02188	lncRNA	red	0.174425	0.394093	-0.0594847	0.772848	0.102702	0.617605	0.118474	0.564327	0.00271401	0.989502
ENSG00000254656	RTL1	protein_coding	red	0.173505	0.396634	-0.0231496	0.910626	0.0346193	0.866667	-0.0317424	0.877662	0.232298	0.253478
ENSG00000172915	NBEA	protein_coding	red	0.172333	0.399878	0.142959	0.485997	0.197011	0.334717	0.0458638	0.823944	-0.150411	0.463304
ENSG00000257556	LINC02298	lncRNA	red	0.172141	0.400414	-0.0749619	0.715898	0.100082	0.62665	0.14756	0.47192	0.228248	0.262082
ENSG00000148468	FAM171A1	protein_coding	red	0.169733	0.407133	0.310971	0.122035	0.291308	0.148776	-0.0237289	0.908398	-0.00356385	0.986215
ENSG00000064225	ST3GAL6	protein_coding	red	0.168238	0.41134	-0.0676382	0.742683	0.00667363	0.974188	-0.136997	0.504547	0.103151	0.616061
ENSG00000172828	CES3	protein_coding	red	0.167032	0.414748	-0.0643122	0.754946	-0.133423	0.515833	-0.0488377	0.81272	0.0377732	0.854642
ENSG00000007237	GAS7	protein_coding	red	0.166748	0.415554	0.0844384	0.681724	0.320933	0.109914	-0.0542355	0.792442	-0.0475873	0.817435
ENSG00000147576	ADHFE1	protein_coding	red	0.166373	0.416619	0.0633575	0.758477	0.134572	0.51219	0.0102203	0.96048	0.20975	0.303753
ENSG00000215146	BX322639.1	transcribed_unprocessed_pseudogene	red	-0.166195	0.417126	-0.122631	0.550637	0.119601	0.5606	-0.168217	0.411398	-0.0533078	0.795918
ENSG00000247877	AC021086.1	lncRNA	red	0.165079	0.420305	0.114864	0.576337	0.361477	0.0696093	-0.118762	0.563374	-0.0544395	0.791678
ENSG00000186638	KIF24	protein_coding	red	0.162638	0.427303	0.193952	0.342425	0.0602467	0.770014	-0.0644411	0.75447	-0.0344171	0.86744
ENSG00000091483	FH	protein_coding	red	0.161507	0.430566	0.0592103	0.773869	0.134794	0.511489	-0.18412	0.367911	0.243683	0.230286
ENSG00000157388	CACNA1D	protein_coding	red	0.160482	0.433539	0.153967	0.452674	0.250136	0.217789	0.0965851	0.638807	-0.0921	0.654531
ENSG00000167912	AC090152.1	lncRNA	red	0.158592	0.439043	-0.0265702	0.897483	0.113464	0.581025	-0.0713054	0.729232	0.0403498	0.844841
ENSG00000224739	AC016735.1	lncRNA	red	0.158327	0.439819	0.00036219	0.998599	0.100073	0.626682	0.234903	0.248041	0.0458835	0.823869
ENSG00000175344	CHRNA7	protein_coding	red	0.158003	0.440768	-0.0674825	0.743256	0.0719187	0.72699	-0.10094	0.623684	0.370047	0.0627788
ENSG00000231927	AC093734.1	lncRNA	red	0.156719	0.444536	0.404352	0.0404784	-0.0305684	0.882156	0.0929008	0.651713	-0.0992964	0.629374
ENSG00000235681	AC245884.3	processed_pseudogene	red	0.153608	0.453741	0.237102	0.243513	0.121194	0.555353	0.237599	0.242497	0.00471982	0.981744
ENSG00000224950	AL390066.1	lncRNA	red	0.153324	0.454588	0.0108087	0.958206	0.171064	0.40341	0.0454838	0.82538	0.127108	0.536069
ENSG00000183598	HIST2H3D	protein_coding	red	0.152116	0.458191	-0.0952971	0.643307	0.184492	0.366928	0.185853	0.363342	0.0257177	0.900756
ENSG00000166664	CHRFAM7A	protein_coding	red	0.151614	0.459693	-0.0608118	0.767915	0.0540973	0.79296	-0.148936	0.467752	0.543405	0.00411766
ENSG00000267013	LINC01929	lncRNA	red	0.151427	0.460254	-0.0539123	0.793653	0.0696695	0.735223	-0.0285646	0.889832	-0.0182554	0.929468
ENSG00000137806	NDUFAF1	protein_coding	red	0.150139	0.464123	-0.0132101	0.948932	0.0657615	0.749595	-0.0262622	0.898666	0.0938073	0.648528
ENSG00000164976	MYORG	protein_coding	red	0.14892	0.467798	-0.0394104	0.848412	-0.0181316	0.929945	-0.0781737	0.704252	-0.135085	0.510569
ENSG00000252516	RNA5SP82	rRNA	red	0.148598	0.468773	0.301997	0.133766	0.16801	0.411984	0.0313325	0.879231	-0.07604	0.711982
ENSG00000279948	AC008895.1	TEC	red	0.148411	0.46934	-0.0525168	0.798885	0.463926	0.0169723	-0.0349566	0.86538	0.0131913	0.949004
ENSG00000254042	AC011365.1	lncRNA	red	0.147325	0.472633	0.0990207	0.63033	0.0356203	0.862848	-0.0566456	0.78343	0.0242439	0.906418
ENSG00000159263	SIM2	protein_coding	red	0.147182	0.473068	0.121569	0.554122	-0.0819356	0.690694	0.366779	0.0653196	0.146731	0.47444
ENSG00000161558	TMEM143	protein_coding	red	0.146771	0.474317	-0.0255232	0.901503	-0.167131	0.414469	-0.0374856	0.855738	0.341059	0.0881767
ENSG00000260420	LINC02182	lncRNA	red	0.145971	0.476755	0.120073	0.559043	-0.0819638	0.690592	-0.100671	0.624612	-0.0427134	0.83587
ENSG00000102531	FNDC3A	protein_coding	red	0.145292	0.478831	-0.0238498	0.907933	0.0184759	0.928619	0.0926117	0.65273	0.0925436	0.652969
ENSG00000275367	AC092111.1	lncRNA	red	0.145167	0.479216	0.0451477	0.826651	0.14181	0.489543	0.0908886	0.658803	0.285335	0.157672
ENSG00000229534	HNRNPA1P53	processed_pseudogene	red	0.145076	0.479493	0.0744151	0.717887	0.0869413	0.672796	0.0201034	0.922348	0.178869	0.381965
ENSG00000100987	VSX1	protein_coding	red	0.144635	0.480843	0.0862185	0.67537	0.00526265	0.979644	0.237224	0.243262	0.000725272	0.997194
ENSG00000224969	AL645608.2	lncRNA	red	0.14275	0.486642	0.316033	0.11576	0.00831247	0.967853	-0.0897893	0.662689	0.0158543	0.938727
ENSG00000261934	PCDHGA9	protein_coding	red	0.142703	0.486784	-0.100752	0.624334	0.114675	0.576968	-0.0459206	0.823729	0.0411419	0.841833
ENSG00000206685	RNU6-1189P	snRNA	red	0.142633	0.487	-0.0444555	0.82927	-0.0490409	0.811955	-0.0957534	0.641711	-0.0561092	0.785433
ENSG00000253910	PCDHGB2	protein_coding	red	0.140196	0.494549	-0.0491407	0.811579	0.108338	0.59833	0.457086	0.0188959	0.080405	0.696199
ENSG00000221829	FANCG	protein_coding	red	0.140129	0.494757	0.149113	0.467216	0.107765	0.600279	0.0593601	0.773312	-0.13986	0.495595
ENSG00000249274	PDLIM1P4	processed_pseudogene	red	0.140042	0.495029	-0.045519	0.825247	0.0751984	0.715038	-0.0826208	0.688234	0.097902	0.634218
ENSG00000188295	ZNF669	protein_coding	red	0.137938	0.501597	0.322741	0.107813	0.281006	0.164349	0.0293664	0.886759	-0.0212599	0.917896
ENSG00000227726	AP001271.1	lncRNA	red	0.137809	0.502002	0.21256	0.297173	0.265759	0.189449	0.0491555	0.811523	0.122707	0.55039
ENSG00000257763	OR5BK1P	unprocessed_pseudogene	red	0.137239	0.503788	0.171106	0.403293	0.179802	0.379446	0.205032	0.315007	0.0552271	0.788731
ENSG00000224389	C4B	protein_coding	red	0.136626	0.505714	0.00278565	0.989225	0.265223	0.190378	-0.0961885	0.640191	0.133073	0.516946
ENSG00000120137	PANK3	protein_coding	red	0.136291	0.506766	0.143641	0.483897	0.350069	0.0795714	-0.024208	0.906556	0.00276738	0.989295
ENSG00000122870	BICC1	protein_coding	red	0.132698	0.518136	0.0122243	0.952738	0.338731	0.0905103	0.190623	0.350934	-0.0635161	0.75789
ENSG00000095015	MAP3K1	protein_coding	red	0.132592	0.518474	-0.00853478	0.966994	0.209108	0.305271	0.0935239	0.649523	0.115472	0.574307
ENSG00000279353	AP001324.3	TEC	red	0.132425	0.519005	0.0459964	0.823443	0.101939	0.620234	0.0497221	0.809389	0.187928	0.357913
ENSG00000053524	MCF2L2	protein_coding	red	0.132271	0.519497	-0.106926	0.603134	0.0346998	0.86636	-0.197503	0.333487	0.358254	0.0723208
ENSG00000281920	AC007389.5	lncRNA	red	0.131046	0.523405	-0.047201	0.818893	0.0212823	0.91781	0.225796	0.267381	0.0818083	0.691151
ENSG00000133055	MYBPH	protein_coding	red	-0.130297	0.525803	-0.0463006	0.822293	0.00113048	0.995627	-0.0722429	0.725806	0.000189221	0.999268
ENSG00000233154	LINC01762	lncRNA	red	0.130285	0.525841	-0.00608935	0.976448	-0.0314546	0.878763	-0.0777999	0.705604	0.273471	0.176443
ENSG00000135338	LCA5	protein_coding	red	0.12998	0.526821	0.0528065	0.797798	0.370125	0.0627186	0.0457822	0.824252	0.00156021	0.993965
ENSG00000157657	ZNF618	protein_coding	red	0.128929	0.530197	0.0591817	0.773975	0.346303	0.0830868	-0.0631675	0.75918	-0.0414391	0.840704
ENSG00000214465	SMARCE1P6	processed_pseudogene	red	-0.128699	0.530936	0.00858488	0.9668	-0.214437	0.292826	-0.14465	0.480797	-0.000827698	0.996798
ENSG00000249430	NA	NA	red	-0.127217	0.535718	-0.0642506	0.755174	0.0681145	0.740932	-0.0767784	0.709304	-0.0744868	0.717626
ENSG00000198756	COLGALT2	protein_coding	red	0.125793	0.540328	0.0282331	0.891104	0.0325099	0.874727	-0.0428718	0.835269	0.0666233	0.746418
ENSG00000223774	AL513217.1	lncRNA	red	0.123208	0.54875	0.0831571	0.686311	0.102803	0.617256	0.00249426	0.990352	0.099554	0.62848
ENSG00000198846	TOX	protein_coding	red	0.121618	0.553958	-0.0229197	0.91151	0.0467956	0.820423	-0.0460466	0.823253	0.0378442	0.854372
ENSG00000275993	CU639417.1	protein_coding	red	-0.12104	0.55586	-0.0919344	0.655114	-0.0265222	0.897668	-0.113871	0.579661	0.0393431	0.848668
ENSG00000196247	ZNF107	protein_coding	red	0.120575	0.55739	0.153541	0.45394	-0.0884691	0.667367	-0.0741609	0.718812	0.36319	0.0682003
ENSG00000205312	KRT17P4	transcribed_unprocessed_pseudogene	red	0.120461	0.557764	0.05181	0.801539	0.0248157	0.904221	-0.016275	0.937104	0.0859717	0.676249
ENSG00000267348	AC011489.1	lncRNA	red	0.119766	0.560057	0.439998	0.0244892	-0.0135762	0.947518	-0.11984	0.559811	0.173675	0.396164
ENSG00000153404	PLEKHG4B	protein_coding	red	-0.118446	0.564419	-0.0782584	0.703946	0.0300616	0.884096	-0.0903292	0.66078	-0.0870479	0.672417
ENSG00000160439	RDH13	protein_coding	red	0.117512	0.567514	0.154275	0.451759	0.0841931	0.682601	0.0370423	0.857426	0.0228683	0.911707
ENSG00000184908	CLCNKB	protein_coding	red	0.117487	0.5676	0.138035	0.501291	0.147601	0.471794	0.082811	0.687552	-0.021729	0.916091
ENSG00000251387	AC008667.3	lncRNA	red	0.117476	0.567635	0.0656791	0.749899	-0.0563052	0.784701	-0.0845136	0.681455	0.197673	0.333063
ENSG00000132334	PTPRE	protein_coding	red	0.117185	0.568601	-0.0610616	0.766987	0.408159	0.0384536	-0.114128	0.578798	0.12519	0.542288
ENSG00000186510	CLCNKA	protein_coding	red	0.116919	0.569487	0.0228118	0.911924	0.0308847	0.880945	-0.0858291	0.676758	0.167266	0.414087
ENSG00000244731	C4A	protein_coding	red	0.116495	0.570898	-0.0385793	0.851574	0.293872	0.145071	-0.0855596	0.677719	0.267786	0.185969
ENSG00000215246	AC116351.1	lncRNA	red	0.114385	0.57794	-0.0567229	0.783141	0.331389	0.0981749	-0.0868374	0.673166	0.411607	0.0366895
ENSG00000114349	GNAT1	protein_coding	red	0.113009	0.58255	0.0373516	0.856248	0.0279473	0.8922	-0.0501415	0.807811	-0.00114734	0.995562
ENSG00000152104	PTPN14	protein_coding	red	0.112375	0.584682	0.0989066	0.630726	0.223418	0.272587	-0.0156961	0.939337	0.0828696	0.687341
ENSG00000249738	AC008691.1	lncRNA	red	0.111323	0.588225	-0.0971245	0.636925	0.384544	0.0524167	-0.151451	0.460183	0.406618	0.0392634
ENSG00000132563	REEP2	protein_coding	red	0.110909	0.589624	-0.0889714	0.665586	0.0511417	0.80405	0.125588	0.540993	-0.0983586	0.63263
ENSG00000230121	AL445070.1	lncRNA	red	0.110499	0.591008	-0.0253615	0.902124	0.0225009	0.913121	-0.0344771	0.86721	0.0507851	0.80539
ENSG00000128833	MYO5C	protein_coding	red	0.109485	0.594439	0.0888776	0.665918	0.211451	0.299759	-0.061098	0.766852	0.181252	0.375549
ENSG00000272068	AL365181.2	lncRNA	red	0.108805	0.596743	-0.0291369	0.887639	-0.0288333	0.888803	0.0851975	0.679012	0.114114	0.578847
ENSG00000243083	LINC00870	lncRNA	red	0.107752	0.600323	0.0440513	0.830801	0.00825314	0.968082	0.0107488	0.958438	0.102852	0.617087
ENSG00000122574	WIPF3	protein_coding	red	0.106842	0.603421	0.129652	0.527871	-0.0681804	0.740689	-0.175758	0.390434	0.58338	0.00175861
ENSG00000184992	BRI3BP	protein_coding	red	0.106687	0.603948	0.103437	0.615077	0.234098	0.249712	0.0976145	0.635219	0.228628	0.261265
ENSG00000159173	TNNI1	protein_coding	red	0.105252	0.608851	-0.00324191	0.98746	0.0529775	0.797157	0.129163	0.529444	0.357951	0.07258
ENSG00000103978	TMEM87A	protein_coding	red	0.10414	0.612663	0.0140914	0.945529	0.164267	0.422626	-0.0659639	0.748849	0.311228	0.12171
ENSG00000105875	WDR91	protein_coding	red	0.103802	0.613823	0.0118535	0.95417	0.197051	0.334618	-0.0941517	0.64732	0.229027	0.260412
ENSG00000189077	TMEM120A	protein_coding	red	-0.102738	0.61748	-0.354095	0.0759386	-0.0935341	0.649487	-0.173629	0.396289	0.663371	0.000220792
ENSG00000137845	ADAM10	protein_coding	red	-0.102508	0.618274	-0.0688354	0.738283	0.194044	0.342193	0.0611696	0.766586	-0.102572	0.618054
ENSG00000259417	CTXND1	protein_coding	red	0.102091	0.619711	-0.00896599	0.965327	-0.00799568	0.969077	-0.0708671	0.730836	0.00182237	0.992951
ENSG00000243642	RN7SL526P	misc_RNA	red	-0.102027	0.619931	-0.000427459	0.998346	0.00534267	0.979335	-0.140861	0.492485	-0.0836218	0.684646
ENSG00000117791	MARC2	protein_coding	red	0.101336	0.622314	0.126841	0.536931	0.0901911	0.661268	-0.0769678	0.708617	0.483268	0.0123846
ENSG00000074695	LMAN1	protein_coding	red	0.100125	0.626503	-0.0149123	0.942361	0.0491929	0.811382	0.114319	0.578159	0.209828	0.303571
ENSG00000176222	ZNF404	protein_coding	red	0.100038	0.626804	-0.0765903	0.709986	0.0788109	0.701949	0.41922	0.0330237	-0.110986	0.589364
ENSG00000234134	AL158835.2	lncRNA	red	0.0995859	0.62837	0.119875	0.559697	0.116882	0.569608	0.136027	0.507598	-0.0334053	0.871305
ENSG00000109758	HGFAC	protein_coding	red	0.0966397	0.638616	-0.011124	0.956988	0.0088524	0.965766	-0.0555171	0.787646	0.0422048	0.837799
ENSG00000175920	DOK7	protein_coding	red	0.0962745	0.639891	0.00822062	0.968208	0.111319	0.588239	-0.0839044	0.683634	0.232079	0.253939
ENSG00000232434	C9orf172	protein_coding	red	-0.0959912	0.64088	-0.0399684	0.84629	0.0798442	0.69822	-0.0606905	0.768365	0.0407146	0.843455
ENSG00000267346	EIF5AP3	processed_pseudogene	red	-0.0955992	0.64225	-0.0724305	0.725121	-0.0661341	0.748221	-0.0508581	0.805116	0.098534	0.63202
ENSG00000125430	HS3ST3B1	protein_coding	red	0.0945659	0.645867	-0.0299259	0.884616	0.0103491	0.959982	-0.0498486	0.808913	0.0574888	0.780283
ENSG00000255920	AC006122.2	lncRNA	red	0.0940938	0.647523	-0.0629325	0.76005	0.0339142	0.86936	-0.0809681	0.694172	0.054944	0.78979
ENSG00000104879	CKM	protein_coding	red	0.0934277	0.649861	-0.0318159	0.877381	0.0662405	0.747829	-0.11566	0.573679	-0.0541182	0.792882
ENSG00000196081	ZNF724	protein_coding	red	0.0905458	0.660014	-0.0431692	0.834142	0.209676	0.303929	0.275891	0.172493	0.0974343	0.635846
ENSG00000064199	SPA17	protein_coding	red	0.0902061	0.661215	-0.0723414	0.725446	0.14667	0.474627	0.0813208	0.692903	-0.0238824	0.907808
ENSG00000198626	RYR2	protein_coding	red	0.0885499	0.66708	-0.00338937	0.986889	0.132844	0.517672	-0.0583423	0.777101	0.219849	0.28052
ENSG00000145002	FAM86B2	protein_coding	red	0.0869142	0.672892	0.142634	0.486997	0.0132064	0.948946	-0.0414071	0.840826	0.0372406	0.856671
ENSG00000264453	NA	NA	red	-0.0866474	0.673842	0.103812	0.613789	-0.0128476	0.950332	0.00720969	0.972116	-0.114379	0.577957
ENSG00000139514	SLC7A1	protein_coding	red	0.0865492	0.674192	-0.0543512	0.792009	0.0849606	0.679858	0.0240116	0.907311	0.335997	0.0933105
ENSG00000270882	HIST2H4A	protein_coding	red	0.0847834	0.680491	-0.0586665	0.775893	0.0713044	0.729236	0.0681951	0.740635	0.0705798	0.731888
ENSG00000215186	GOLGA6B	protein_coding	red	0.0828338	0.68747	0.182063	0.37338	-0.0384674	0.851999	-0.0849859	0.679767	-0.0545089	0.791419
ENSG00000196517	SLC6A9	protein_coding	red	0.0826218	0.68823	0.0138101	0.946615	0.172646	0.399011	-0.0813538	0.692784	0.10597	0.606398
ENSG00000173041	ZNF680	protein_coding	red	-0.0816514	0.691715	-0.0647448	0.753347	-0.00359215	0.986105	-0.0692542	0.736746	0.239195	0.239253
ENSG00000174567	GOLT1A	protein_coding	red	0.0812249	0.693248	-0.0545669	0.791201	0.0467533	0.820583	-0.005738	0.977806	0.0358434	0.861997
ENSG00000275183	LENG9	protein_coding	red	0.0808216	0.694699	-0.158781	0.438491	0.0667446	0.745972	-0.0893351	0.664297	0.212314	0.297745
ENSG00000140876	NUDT7	protein_coding	red	-0.0793971	0.699833	-0.102951	0.616747	-0.0400014	0.846165	-0.052845	0.797654	0.0432214	0.833945
ENSG00000114378	HYAL1	protein_coding	red	0.0790891	0.700944	-0.124053	0.545991	-0.0572768	0.781074	-0.0278415	0.892605	0.238569	0.240523
ENSG00000176919	C8G	protein_coding	red	0.0790258	0.701173	-0.0400522	0.845972	-0.080914	0.694366	-0.074365	0.71807	0.285945	0.156746
ENSG00000267053	AC012617.1	lncRNA	red	0.0788452	0.701825	-0.0519131	0.801152	0.0150247	0.941928	-0.0352175	0.864384	0.105979	0.606365
ENSG00000185186	LINC00313	lncRNA	red	0.0780278	0.70478	-0.00545711	0.978892	0.182279	0.372804	0.120745	0.556829	0.175863	0.390145
ENSG00000148358	GPR107	protein_coding	red	0.0760251	0.712036	-0.0842241	0.682491	0.173014	0.397992	-0.109208	0.595378	0.084413	0.681815
ENSG00000231940	RPS7P3	processed_pseudogene	red	-0.0747286	0.716746	-0.0026341	0.989811	-0.0727014	0.724132	0.186141	0.362585	-0.0785389	0.702932
ENSG00000229380	AC147651.1	lncRNA	red	0.0742755	0.718395	0.026329	0.898409	0.0321102	0.876255	-0.057189	0.781402	-0.0245403	0.90528
ENSG00000163485	ADORA1	protein_coding	red	0.0726381	0.724363	0.089272	0.664521	0.146617	0.474786	-0.0624998	0.761653	0.0193243	0.92535
ENSG00000223768	LINC00205	lncRNA	red	-0.070792	0.731111	-0.117922	0.566155	-0.142813	0.486447	0.0595794	0.772496	0.182742	0.37157
ENSG00000149043	SYT8	protein_coding	red	-0.0704373	0.732409	0.0268443	0.896431	0.0606635	0.768465	-0.0717458	0.727622	-0.0151538	0.94143
ENSG00000232259	AL158166.2	lncRNA	red	0.0700756	0.733735	-0.176859	0.387425	0.159045	0.437722	-0.146505	0.475129	0.00422749	0.983648
ENSG00000232936	AL157400.2	lncRNA	red	0.0696424	0.735322	0.238169	0.241334	0.156863	0.444114	0.0226503	0.912546	0.171037	0.403487
ENSG00000164211	STARD4	protein_coding	red	0.06908	0.737385	-0.0666083	0.746474	0.0958682	0.64131	0.0794708	0.699567	0.0230429	0.911036
ENSG00000234771	SLC25A25-AS1	lncRNA	red	-0.0681545	0.740785	0.107708	0.60047	-0.115796	0.573227	-0.0624018	0.762016	-0.14879	0.468193
ENSG00000135902	CHRND	protein_coding	red	0.0681066	0.740961	-0.0269141	0.896163	-0.0375247	0.855589	-0.084726	0.680696	0.0499697	0.808458
ENSG00000171540	OTP	protein_coding	red	0.0678404	0.741939	0.259761	0.200013	0.154158	0.452107	-0.00718058	0.972228	0.288189	0.153375
ENSG00000181541	MAB21L2	protein_coding	red	0.0668826	0.745463	0.0990348	0.630281	0.11229	0.584968	-0.0442728	0.829962	-0.0671709	0.744402
ENSG00000163638	ADAMTS9	protein_coding	red	0.0667847	0.745824	0.0148929	0.942436	0.0503566	0.807002	0.0694079	0.736183	-0.0230841	0.910877
ENSG00000271550	BNIP3P11	processed_pseudogene	red	-0.0638988	0.756474	-0.0378021	0.854532	-0.216522	0.288044	-0.0351937	0.864475	0.210276	0.302515
ENSG00000253537	PCDHGA7	protein_coding	red	-0.0629676	0.75992	-0.0857943	0.676882	0.0281262	0.891514	-0.0332981	0.871714	0.0734694	0.721331
ENSG00000236829	Z97634.1	transcribed_processed_pseudogene	red	0.0621394	0.762989	-0.113359	0.581378	-0.0754802	0.714015	-0.0935539	0.649418	0.193889	0.342585
ENSG00000278090	AC036108.4	lncRNA	red	0.0603589	0.769597	0.106563	0.604371	-0.043181	0.834098	-0.0301866	0.883618	0.0670351	0.744902
ENSG00000113209	PCDHB5	protein_coding	red	-0.0597629	0.771813	-0.0854887	0.677972	0.0339247	0.86932	0.0333034	0.871694	-0.0150127	0.941974
ENSG00000091127	PUS7	protein_coding	red	0.0595779	0.772501	0.0707108	0.731408	0.210937	0.300964	-0.0895215	0.663637	0.0706278	0.731712
ENSG00000242686	AC107464.1	lncRNA	red	0.0576034	0.779856	-0.0529289	0.797339	0.0624763	0.76174	-0.151034	0.461433	0.461592	0.0176099
ENSG00000102900	NUP93	protein_coding	red	-0.0574749	0.780335	-0.0199813	0.922819	-0.273281	0.176755	-0.0812739	0.693072	-0.170768	0.404239
ENSG00000159261	CLDN14	protein_coding	red	0.0573717	0.78072	-0.0140421	0.94572	0.151814	0.459095	0.0610469	0.767042	0.0973831	0.636024
ENSG00000261124	AC135050.4	lncRNA	red	0.0567595	0.783004	0.247127	0.223559	-0.0455118	0.825274	0.0951105	0.64396	-0.0671671	0.744416
ENSG00000267677	AC016229.2	lncRNA	red	-0.053625	0.794729	-0.0897835	0.66271	-0.191113	0.349675	-0.0450643	0.826967	0.0403926	0.844679
ENSG00000152128	TMEM163	protein_coding	red	-0.0535619	0.794966	-0.197228	0.334174	-0.0509505	0.804768	-0.142332	0.487931	-0.0639388	0.756326
ENSG00000273582	AC009093.5	lncRNA	red	0.0517979	0.801584	0.26943	0.183177	0.0959125	0.641155	-0.0857554	0.677021	0.041301	0.841228
ENSG00000105737	GRIK5	protein_coding	red	0.0493802	0.810677	-0.0893727	0.664164	-0.0858747	0.676596	-0.0527076	0.798169	0.487391	0.0115534
ENSG00000181790	ADGRB1	protein_coding	red	0.0471261	0.819176	0.0847568	0.680586	0.155323	0.448655	-0.0932381	0.650527	0.135017	0.510785
ENSG00000231794	AC009542.1	lncRNA	red	0.0453528	0.825876	0.0222245	0.914184	0.125992	0.539683	-0.0606336	0.768577	0.0773311	0.707301
ENSG00000135314	KHDC1	protein_coding	red	-0.0435926	0.832538	-0.0271352	0.895315	0.198992	0.329781	0.147027	0.473539	0.207983	0.30794
ENSG00000010310	GIPR	protein_coding	red	0.0433454	0.833474	-0.155215	0.448974	0.174622	0.393551	0.217581	0.285636	0.0145863	0.943619
ENSG00000181450	ZNF678	protein_coding	red	0.0412096	0.841576	0.228104	0.262391	0.231672	0.254794	0.000425595	0.998354	0.0955152	0.642544
ENSG00000259967	AC087761.1	lncRNA	red	0.0410163	0.84231	0.157991	0.440801	-0.0338489	0.86961	-0.186461	0.361747	0.264941	0.190866
ENSG00000183340	JRKL	protein_coding	red	-0.0401798	0.845487	0.0397462	0.847135	0.302188	0.133508	0.193724	0.343004	0.0738342	0.720002
ENSG00000223723	BX842568.2	processed_pseudogene	red	0.0395685	0.847811	-0.133104	0.516846	-0.0615089	0.765327	-0.0803956	0.696233	-0.0250594	0.903285
ENSG00000265554	AP005271.1	lncRNA	red	0.0383712	0.852366	0.438075	0.0251948	0.0304586	0.882576	-0.0696088	0.735446	0.173267	0.397291
ENSG00000187957	DNER	protein_coding	red	-0.0377608	0.854689	-0.143714	0.48367	-0.0958973	0.641208	-0.0997691	0.627735	0.208695	0.306248
ENSG00000267605	AC016590.1	lncRNA	red	-0.0376151	0.855244	-0.112002	0.585936	0.0415269	0.840371	-0.0996636	0.6281	-0.0125841	0.951349
ENSG00000274798	AC025166.1	lncRNA	red	-0.0349256	0.865498	-0.0152675	0.940991	0.401363	0.0421271	-0.18987	0.352877	0.0777465	0.705797
ENSG00000236136	ADORA2BP1	processed_pseudogene	red	-0.03296	0.873006	-0.0469317	0.81991	0.336518	0.0927721	-0.130108	0.526409	0.0797917	0.69841
ENSG00000254978	ALG1L9P	transcribed_unprocessed_pseudogene	red	-0.031975	0.876772	0.0306344	0.881903	0.104694	0.610763	0.0310558	0.88029	0.346833	0.0825852
ENSG00000156017	CARNMT1	protein_coding	red	-0.0319552	0.876848	-0.0863832	0.674783	-0.0212292	0.918014	-0.294123	0.144712	0.00174704	0.993242
ENSG00000125931	CITED1	protein_coding	red	0.0318144	0.877387	-0.00575394	0.977745	0.04852	0.813918	-0.0646854	0.753567	0.0493215	0.810898
ENSG00000105245	NUMBL	protein_coding	red	0.0315014	0.878584	0.00795364	0.96924	-0.0366787	0.858812	-0.0836695	0.684475	0.246227	0.225304
ENSG00000229207	SERPINH1P1	processed_pseudogene	red	0.0313373	0.879212	-0.159636	0.435998	0.181298	0.375428	0.0109795	0.957547	0.10469	0.610778
ENSG00000187720	THSD4	protein_coding	red	-0.0311902	0.879775	-0.0172538	0.93333	0.113119	0.582184	-0.0495735	0.809949	0.0775399	0.706545
ENSG00000188338	SLC38A3	protein_coding	red	-0.0306584	0.881811	-0.10645	0.604757	-0.0586991	0.775772	-0.0733016	0.721943	-0.111172	0.588737
ENSG00000104140	RHOV	protein_coding	red	0.029179	0.887477	0.0578125	0.779076	0.289483	0.151455	-0.0998131	0.627582	0.107948	0.599655
ENSG00000196214	ZNF766	protein_coding	red	0.0266142	0.897315	0.0491755	0.811448	0.142936	0.486067	0.0398136	0.846879	-0.0913664	0.657117
ENSG00000227671	AL390728.4	transcribed_unprocessed_pseudogene	red	0.0259506	0.899862	0.172455	0.399541	0.0103988	0.95979	0.0902016	0.661231	0.0315109	0.878548
ENSG00000188488	SERPINA5	protein_coding	red	0.0248998	0.903898	0.0700504	0.733827	0.0889167	0.66578	0.0397274	0.847207	-0.0318424	0.87728
ENSG00000215861	AC245297.1	unprocessed_pseudogene	red	-0.0241466	0.906792	-0.136953	0.504686	0.0134642	0.947951	-0.0628732	0.76027	0.00269733	0.989566
ENSG00000257800	FNBP1P1	processed_pseudogene	red	0.0236722	0.908616	-0.00297836	0.988479	0.144486	0.4813	0.184618	0.366596	0.044985	0.827267
ENSG00000232739	AL607028.1	lncRNA	red	0.0235902	0.908931	-0.0554291	0.787976	0.199298	0.329024	-0.102256	0.619142	-0.122993	0.549454
ENSG00000128928	IVD	protein_coding	red	0.0232654	0.91018	0.0909398	0.658623	-0.00191405	0.992596	-0.004688	0.981867	0.144045	0.482655
ENSG00000237664	LINC00316	lncRNA	red	-0.0215862	0.91664	0.08445	0.681682	0.231497	0.255165	-0.0239588	0.907514	-0.0936831	0.648964
ENSG00000137869	CYP19A1	protein_coding	red	-0.0210044	0.91888	0.0113332	0.95618	0.019339	0.925293	-0.0699971	0.734022	-0.00264637	0.989763
ENSG00000205669	ACOT6	protein_coding	red	0.0209015	0.919275	-0.15534	0.448605	0.13043	0.525377	0.14979	0.465174	0.150174	0.464016
ENSG00000229862	AL121972.2	lncRNA	red	0.0189875	0.926647	-0.156219	0.44601	0.00569436	0.977975	-0.109338	0.594936	0.310017	0.123244
ENSG00000181322	NME9	protein_coding	red	0.0173636	0.932906	-0.00584445	0.977395	0.234388	0.24911	-0.103948	0.613322	0.220878	0.278217
ENSG00000232303	DFFBP1	processed_pseudogene	red	0.0131574	0.949135	0.0160404	0.938009	0.044516	0.829041	-0.106265	0.605388	0.046271	0.822405
ENSG00000115419	GLS	protein_coding	red	-0.0128896	0.950169	0.00239903	0.99072	0.0977836	0.63463	-0.0682832	0.740312	0.0342447	0.868098
ENSG00000144749	LRIG1	protein_coding	red	0.0109467	0.957673	0.124454	0.544685	-0.064624	0.753794	-0.234857	0.248138	-0.170563	0.40481
ENSG00000205683	DPF3	protein_coding	red	-0.010188	0.960605	-0.120059	0.559089	-0.00192789	0.992542	-0.105494	0.608024	-0.00752537	0.970895
ENSG00000148339	SLC25A25	protein_coding	red	-0.0100417	0.96117	-0.100841	0.624025	0.0158529	0.938732	-0.0864347	0.6746	0.00268627	0.989609
ENSG00000196361	ELAVL3	protein_coding	red	0.00710551	0.972519	-0.0622365	0.762629	-0.00495335	0.980841	-0.0458884	0.823851	0.099634	0.628203
ENSG00000230849	GOT2P2	processed_pseudogene	red	-0.00286029	0.988936	0.102904	0.616911	-0.291404	0.148637	-0.266938	0.187419	-0.0870223	0.672508
ENSG00000250376	AC093720.1	unprocessed_pseudogene	red	0.0015207	0.994117	-0.0713599	0.729033	0.0257763	0.900531	-0.106948	0.60306	0.0174224	0.932679
ENSG00000225362	CT62	protein_coding	red	0.00111765	0.995677	0.0354212	0.863607	0.0354934	0.863332	-0.0767033	0.709576	0.0641251	0.755638
ENSG00000245479	LINC01585	lncRNA	red	0.000324045	0.998746	0.0326921	0.87403	0.0839531	0.68346	0.0731518	0.722489	0.108409	0.598089

## Sheet: KICH_M
geneId	geneSymbol	geneBiotype	moduleColor	GS.stage_tnm_M	p.GS.stage_tnm_M	MM.royalblue	p.MM.royalblue
ENSG00000148948	LRRC4C	protein_coding	green	0.438925	0.0219961	0.398273	0.039631
ENSG00000203722	RAET1G	protein_coding	green	0.423923	0.0275493	0.398498	0.0395092
ENSG00000120210	INSL6	protein_coding	green	0.399967	0.0387218	0.393313	0.0423926
ENSG00000151655	ITIH2	protein_coding	green	0.356958	0.067581	0.366815	0.0598304
ENSG00000236577	SNRPGP14	processed_pseudogene	green	0.342055	0.0807437	0.406375	0.0354302
ENSG00000214244	SETP21	processed_pseudogene	green	0.318732	0.105148	0.296797	0.132751
ENSG00000180332	KCTD4	protein_coding	green	0.288414	0.144582	0.180263	0.36825
ENSG00000263006	ROCK1P1	transcribed_unprocessed_pseudogene	green	0.269124	0.174642	0.212295	0.287739
ENSG00000213197	AC012066.1	processed_pseudogene	green	0.267568	0.177244	0.346935	0.0762352
ENSG00000173852	DPY19L1	protein_coding	green	-0.258918	0.192203	-0.289551	0.142935
ENSG00000236778	INTS6-AS1	lncRNA	green	0.247533	0.213191	0.319345	0.104443
ENSG00000118242	MREG	protein_coding	green	-0.239964	0.227971	-0.262607	0.185721
ENSG00000267644	AC061975.8	lncRNA	green	-0.223308	0.262863	-0.1787	0.372486
ENSG00000260710	AC120498.4	lncRNA	green	-0.220299	0.269517	-0.178877	0.372007
ENSG00000132938	MTUS2	protein_coding	green	0.219894	0.270421	0.224791	0.259625
ENSG00000163645	ERICH6	protein_coding	green	-0.21827	0.274063	-0.187675	0.348549
ENSG00000258820	AF111167.1	lncRNA	green	0.217459	0.275896	0.241934	0.224061
ENSG00000095627	TDRD1	protein_coding	green	-0.215821	0.279616	-0.190221	0.341929
ENSG00000271659	AL161729.4	lncRNA	green	0.203934	0.307585	0.324291	0.0988866
ENSG00000116260	QSOX1	protein_coding	green	-0.203271	0.309194	-0.235053	0.237919
ENSG00000182366	FAM87A	lncRNA	green	-0.201041	0.314645	-0.218907	0.272632
ENSG00000253528	AC087752.2	processed_pseudogene	green	-0.198324	0.321366	-0.150448	0.453833
ENSG00000261764	KRT18P18	transcribed_processed_pseudogene	green	-0.197609	0.32315	-0.208272	0.297185
ENSG00000258830	AC137834.1	protein_coding	green	0.195473	0.328513	0.227977	0.252754
ENSG00000188729	OSTN	protein_coding	green	-0.19257	0.335887	-0.201986	0.312329
ENSG00000250886	AC010368.1	processed_pseudogene	green	-0.191474	0.338697	-0.263759	0.183728
ENSG00000231875	AL359885.1	processed_pseudogene	green	0.18855	0.346263	0.269203	0.174511
ENSG00000225521	AC005237.1	lncRNA	green	-0.186752	0.350967	-0.209729	0.293742
ENSG00000258740	AL691403.1	lncRNA	green	0.185222	0.354998	0.196375	0.32624
ENSG00000165272	AQP3	protein_coding	green	-0.184324	0.357376	-0.164433	0.412451
ENSG00000263155	MYZAP	protein_coding	green	-0.183491	0.359591	-0.102457	0.611079
ENSG00000151287	TEX30	protein_coding	green	-0.182598	0.361975	-0.301802	0.126034
ENSG00000261795	AC093627.7	lncRNA	green	-0.180617	0.367296	-0.232219	0.24379
ENSG00000162738	VANGL2	protein_coding	green	0.18054	0.367505	0.111731	0.579003
ENSG00000259935	AC009754.1	lncRNA	green	-0.175755	0.380546	-0.132719	0.509301
ENSG00000272872	AP000525.1	lncRNA	green	-0.172475	0.389638	-0.184301	0.357439
ENSG00000237234	Z99289.1	lncRNA	green	-0.169411	0.398243	-0.154047	0.442978
ENSG00000268789	VN1R87P	unprocessed_pseudogene	green	0.166953	0.405223	0.315684	0.108703
ENSG00000129757	CDKN1C	protein_coding	green	-0.159713	0.426176	-0.135108	0.501639
ENSG00000255648	AC087242.1	lncRNA	green	-0.159457	0.426927	-0.124064	0.537538
ENSG00000267583	AC007998.3	lncRNA	green	-0.159338	0.427278	-0.171988	0.391
ENSG00000138696	BMPR1B	protein_coding	green	-0.159143	0.427852	-0.217656	0.275449
ENSG00000275763	C18orf65	lncRNA	green	-0.15471	0.440996	-0.0998411	0.62026
ENSG00000049323	LTBP1	protein_coding	green	-0.154707	0.441004	-0.163157	0.416136
ENSG00000237529	AL137847.2	lncRNA	green	-0.154204	0.44251	-0.103586	0.607137
ENSG00000260526	AC109347.1	lncRNA	green	0.15207	0.448925	0.243567	0.220852
ENSG00000238188	AL049733.1	processed_pseudogene	green	0.151393	0.45097	0.155855	0.437579
ENSG00000236394	AL807752.4	lncRNA	green	-0.150131	0.454797	-0.0179655	0.929129
ENSG00000250424	AC004691.2	protein_coding	green	-0.150106	0.454874	-0.212989	0.286129
ENSG00000269553	U62631.1	lncRNA	green	-0.149758	0.455931	-0.135133	0.501559
ENSG00000188992	LIPI	protein_coding	green	-0.147216	0.463702	-0.147726	0.462136
ENSG00000248429	FAM198B-AS1	lncRNA	green	-0.147105	0.464042	-0.126309	0.530143
ENSG00000172061	LRRC15	protein_coding	green	-0.139763	0.486875	-0.0982495	0.625872
ENSG00000254695	AC087379.2	lncRNA	green	-0.138449	0.491018	-0.10359	0.607121
ENSG00000118194	TNNT2	protein_coding	green	0.135498	0.500395	0.0756713	0.707562
ENSG00000245651	AC083805.1	lncRNA	green	-0.135066	0.501773	-0.0932647	0.643582
ENSG00000258792	AL137230.1	lncRNA	green	0.132633	0.509578	0.140215	0.485451
ENSG00000251027	LINC01950	lncRNA	green	-0.132223	0.5109	-0.1366	0.496882
ENSG00000266850	AC090912.2	lncRNA	green	-0.129818	0.518684	-0.0555737	0.783072
ENSG00000136514	RTP4	protein_coding	green	0.125758	0.531952	0.135944	0.498972
ENSG00000238364	RNU7-140P	snRNA	green	0.124382	0.536488	0.125792	0.531841
ENSG00000280424	BX537318.2	TEC	green	-0.120848	0.548213	-0.179862	0.369334
ENSG00000280422	AC115284.2	TEC	green	0.117135	0.56066	0.110356	0.583713
ENSG00000256779	AP002383.4	transcribed_processed_pseudogene	green	-0.117095	0.560796	-0.139164	0.488761
ENSG00000095303	PTGS1	protein_coding	green	-0.113127	0.574239	-0.158271	0.43042
ENSG00000150471	ADGRL3	protein_coding	green	-0.108748	0.589238	-0.145947	0.467604
ENSG00000231927	AC093734.1	lncRNA	green	-0.107912	0.592123	-0.169616	0.397665
ENSG00000159374	M1AP	protein_coding	green	-0.107735	0.592734	-0.129291	0.520396
ENSG00000179520	SLC17A8	protein_coding	green	0.10362	0.607017	0.0361013	0.858119
ENSG00000171864	PRND	protein_coding	green	-0.103249	0.608312	-0.0282308	0.888836
ENSG00000054179	ENTPD2	protein_coding	green	-0.101721	0.613656	-0.0631761	0.754241
ENSG00000226798	AL138749.1	lncRNA	green	-0.100326	0.618556	-0.121698	0.545382
ENSG00000248278	SUMO2P17	transcribed_processed_pseudogene	green	-0.098844	0.623773	-0.10694	0.595483
ENSG00000101463	SYNDIG1	protein_coding	green	-0.098561	0.624772	-0.200989	0.314772
ENSG00000254034	INTS9-AS1	lncRNA	green	-0.0981361	0.626273	-0.11203	0.577982
ENSG00000183117	CSMD1	protein_coding	green	0.0944062	0.639509	0.0609223	0.762757
ENSG00000258551	CRAT37	lncRNA	green	-0.0917252	0.64909	-0.112895	0.57503
ENSG00000232454	AL138752.1	processed_pseudogene	green	-0.0917043	0.649165	-0.150641	0.453247
ENSG00000258837	AL133370.1	lncRNA	green	-0.0916434	0.649383	-0.0123099	0.951407
ENSG00000170409	AC091390.1	unprocessed_pseudogene	green	0.0914579	0.650048	0.110184	0.584303
ENSG00000185897	FFAR3	protein_coding	green	-0.0913783	0.650334	-0.0203482	0.919757
ENSG00000172425	TTC36	protein_coding	green	0.0896713	0.656467	0.0459252	0.820064
ENSG00000109424	UCP1	protein_coding	green	-0.0879902	0.662529	-0.0814388	0.686348
ENSG00000231621	AC013264.1	lncRNA	green	-0.0875314	0.664187	-0.118258	0.556883
ENSG00000070601	FRMPD1	protein_coding	green	-0.0861172	0.669307	-0.155445	0.438802
ENSG00000237212	AL449403.1	lncRNA	green	0.0820114	0.684254	0.20426	0.306796
ENSG00000279036	AC015656.1	TEC	green	0.0813712	0.686595	0.160007	0.425314
ENSG00000145808	ADAMTS19	protein_coding	green	-0.0807816	0.688754	-0.0440192	0.827419
ENSG00000197301	AC090673.1	lncRNA	green	-0.0805365	0.689652	-0.0224284	0.911584
ENSG00000164082	GRM2	protein_coding	green	-0.0797866	0.692402	-0.107257	0.594387
ENSG00000265944	LINC01387	lncRNA	green	-0.079115	0.694868	-0.0865736	0.667653
ENSG00000162891	IL20	protein_coding	green	-0.0788689	0.695773	-0.107833	0.592394
ENSG00000198223	CSF2RA	protein_coding	green	-0.0768441	0.70323	-0.127577	0.525988
ENSG00000273923	AC104260.1	lncRNA	green	0.076013	0.706299	0.122957	0.541201
ENSG00000271849	AC012603.1	lncRNA	green	-0.0759222	0.706635	-0.0659829	0.743675
ENSG00000266968	AC023421.1	lncRNA	green	-0.0753811	0.708635	-0.090655	0.65293
ENSG00000249159	AC091965.1	lncRNA	green	0.074504	0.711882	0.041987	0.835277
ENSG00000069011	PITX1	protein_coding	green	-0.0743828	0.712331	-0.0292667	0.884783
ENSG00000156414	TDRD9	protein_coding	green	-0.0737979	0.7145	-0.0634091	0.753362
ENSG00000198336	MYL4	protein_coding	green	-0.0734506	0.715789	-0.113734	0.572175
ENSG00000237989	LINC01679	lncRNA	green	-0.0726667	0.7187	-0.105883	0.599143
ENSG00000054938	CHRDL2	protein_coding	green	-0.0716345	0.722539	-0.097708	0.627787
ENSG00000242190	AC017015.2	lncRNA	green	0.0702332	0.727762	0.135621	0.500001
ENSG00000084444	FAM234B	protein_coding	green	-0.0697605	0.729526	-0.0247984	0.902283
ENSG00000133636	NTS	protein_coding	green	-0.0689162	0.732681	-0.10162	0.614011
ENSG00000258425	AC013451.1	lncRNA	green	-0.0665285	0.741627	-0.0832977	0.679558
ENSG00000196074	SYCP2	protein_coding	green	-0.0658079	0.744333	-0.106992	0.595302
ENSG00000132681	ATP1A4	protein_coding	green	-0.0645742	0.748973	-0.0801811	0.690955
ENSG00000204173	LRRC37A5P	transcribed_unprocessed_pseudogene	green	0.0642298	0.750269	0.0763032	0.705227
ENSG00000101405	OXT	protein_coding	green	-0.0640438	0.75097	-0.103119	0.608766
ENSG00000122691	TWIST1	protein_coding	green	-0.0632896	0.753813	-0.108817	0.589002
ENSG00000111305	GSG1	protein_coding	green	-0.062527	0.756691	-0.0329942	0.870224
ENSG00000225472	AL136366.1	lncRNA	green	-0.0602875	0.76516	0.0390206	0.846774
ENSG00000101489	CELF4	protein_coding	green	-0.0602409	0.765336	0.0174735	0.931065
ENSG00000180730	SHISA2	protein_coding	green	-0.0601251	0.765775	-0.113962	0.571398
ENSG00000277245	AC084782.3	lncRNA	green	-0.0588133	0.77075	-0.0252664	0.900448
ENSG00000108576	SLC6A4	protein_coding	green	-0.0573161	0.776438	-0.043546	0.829247
ENSG00000258553	AL157911.1	lncRNA	green	0.0571431	0.777096	0.19166	0.338219
ENSG00000255480	AL353699.1	lncRNA	green	0.0562915	0.780337	0.0928323	0.645127
ENSG00000064300	NGFR	protein_coding	green	0.0554195	0.78366	0.0815654	0.685884
ENSG00000269397	AC011503.2	lncRNA	green	-0.0519113	0.797064	-0.00890152	0.964852
ENSG00000265590	AP000275.2	protein_coding	green	-0.0497714	0.805268	-0.105317	0.601111
ENSG00000120498	TEX11	protein_coding	green	-0.0489504	0.808421	-0.0818888	0.684702
ENSG00000256827	AC068790.1	processed_pseudogene	green	-0.0474491	0.814194	-0.0356579	0.859845
ENSG00000167106	FAM102A	protein_coding	green	0.0468903	0.816346	0.0961	0.633485
ENSG00000119547	ONECUT2	protein_coding	green	-0.0459026	0.820151	-0.0780422	0.698814
ENSG00000238178	AC078993.1	lncRNA	green	-0.0433599	0.829967	-0.0627464	0.755863
ENSG00000226051	ZNF503-AS1	lncRNA	green	-0.0425733	0.833008	-0.130106	0.51775
ENSG00000126010	GRPR	protein_coding	green	-0.0418857	0.835669	-0.0562031	0.780674
ENSG00000228016	RAPGEF4-AS1	lncRNA	green	-0.0410613	0.838861	-0.0535925	0.790633
ENSG00000243566	UPK3B	protein_coding	green	0.0401891	0.842242	0.01373	0.945809
ENSG00000258215	AC078886.1	processed_pseudogene	green	-0.0392383	0.845929	0.0249098	0.901846
ENSG00000180929	GPR62	protein_coding	green	-0.0359799	0.858591	-0.0640651	0.75089
ENSG00000227218	AL157935.1	lncRNA	green	-0.0349167	0.86273	-0.044465	0.825698
ENSG00000116218	NPHS2	protein_coding	green	-0.0338597	0.866849	-0.0314577	0.87622
ENSG00000224614	TNK2-AS1	lncRNA	green	-0.0334405	0.868483	-0.0553545	0.783908
ENSG00000259023	LINC00524	lncRNA	green	-0.0310729	0.877723	-0.00490024	0.980647
ENSG00000075035	WSCD2	protein_coding	green	-0.0290947	0.885455	-0.0303897	0.880392
ENSG00000270906	MTND4P35	processed_pseudogene	green	-0.0262008	0.896786	-0.0415523	0.83696
ENSG00000213973	ZNF99	protein_coding	green	0.0248471	0.902092	0.0913635	0.650387
ENSG00000005249	PRKAR2B	protein_coding	green	0.0243627	0.903992	-0.0401098	0.842549
ENSG00000223685	LINC00571	lncRNA	green	0.0239033	0.905795	-0.0879927	0.66252
ENSG00000279353	AP001324.3	TEC	green	0.0232639	0.908304	0.0372254	0.853747
ENSG00000207138	RNU6-869P	snRNA	green	0.0229067	0.909706	-0.0229798	0.909419
ENSG00000225630	MTND2P28	unprocessed_pseudogene	green	0.0213914	0.915657	-0.0129911	0.948722
ENSG00000226194	LINC02519	lncRNA	green	-0.0205659	0.918902	0.0386948	0.848039
ENSG00000256056	AC087257.2	unprocessed_pseudogene	green	-0.0205373	0.919014	-0.0560961	0.781081
ENSG00000113946	CLDN16	protein_coding	green	-0.0202538	0.920129	-0.0843669	0.675664
ENSG00000268529	CYP2T3P	unprocessed_pseudogene	green	0.0197865	0.921966	0.0441307	0.826989
ENSG00000145536	ADAMTS16	protein_coding	green	-0.0178355	0.92964	-0.0924636	0.646446
ENSG00000177406	AC021054.1	lncRNA	green	-0.0128671	0.94921	0.0602285	0.765384
ENSG00000182798	MAGEB17	protein_coding	green	0.0125233	0.950566	0.0134823	0.946786
ENSG00000147912	FBXO10	protein_coding	green	-0.011503	0.954589	0.133432	0.507008
ENSG00000227342	LINC00307	lncRNA	green	0.0112636	0.955533	0.0341095	0.865875
ENSG00000280039	RN7SKP23	TEC	green	0.0104309	0.958818	0.093278	0.643534
ENSG00000211689	TRGC1	TR_C_gene	green	0.00981919	0.961231	0.00201112	0.992057
ENSG00000243914	RPL5P14	processed_pseudogene	green	-0.00690869	0.972717	0.0493605	0.806846
ENSG00000211445	GPX3	protein_coding	green	-0.00411129	0.983763	0.0483197	0.810845
ENSG00000241282	RPL34P33	processed_pseudogene	green	0.00404594	0.984021	0.0909711	0.651795
ENSG00000267630	AC005758.1	transcribed_unprocessed_pseudogene	green	-0.00350131	0.986171	-0.0626859	0.756091
ENSG00000234996	AC098934.2	transcribed_processed_pseudogene	green	0.00121123	0.995216	0.0859962	0.669746
ENSG00000259158	ADAM20P1	transcribed_unprocessed_pseudogene	royalblue	0.959266	3.09652e-15	0.967009	2.31544e-16
ENSG00000280195	AC245140.2	lncRNA	royalblue	0.927887	3.29072e-12	0.960307	2.25367e-15
ENSG00000274735	NA	NA	royalblue	0.999069	1.18548e-35	0.957974	4.54304e-15
ENSG00000275772	AC244157.2	processed_pseudogene	royalblue	0.976536	3.44298e-18	0.948453	5.53952e-14
ENSG00000166793	YPEL4	protein_coding	royalblue	0.979737	5.60165e-19	0.945511	1.09106e-13
ENSG00000263862	LINC01543	lncRNA	royalblue	0.975551	5.72669e-18	0.944733	1.29717e-13
ENSG00000154252	GAL3ST2	protein_coding	royalblue	0.969447	8.98647e-17	0.941548	2.56799e-13
ENSG00000233421	LINC01783	lncRNA	royalblue	0.975081	7.24843e-18	0.933301	1.27781e-12
ENSG00000232360	AP000281.2	lncRNA	royalblue	0.898603	1.98175e-10	0.930537	2.09104e-12
ENSG00000230316	FEZF1-AS1	lncRNA	royalblue	0.950467	3.40372e-14	0.915367	2.27182e-11
ENSG00000228549	BX284668.2	lncRNA	royalblue	0.919686	1.20889e-11	0.899677	1.7451e-10
ENSG00000258896	SCOCP1	processed_pseudogene	royalblue	0.814401	2.35137e-07	0.891101	4.63838e-10
ENSG00000260519	AC096734.2	lncRNA	royalblue	0.89308	3.72883e-10	0.887251	7.00832e-10
ENSG00000259763	LINC02157	lncRNA	royalblue	0.903243	1.13238e-10	0.884718	9.12179e-10
ENSG00000164520	RAET1E	protein_coding	royalblue	0.92204	8.44311e-12	0.882781	1.1112e-09
ENSG00000183396	TMEM89	protein_coding	royalblue	0.8421	3.6566e-08	0.872906	2.88931e-09
ENSG00000119715	ESRRB	protein_coding	royalblue	0.860196	8.85119e-09	0.871923	3.16359e-09
ENSG00000224161	RPS26P54	processed_pseudogene	royalblue	0.85204	1.71673e-08	0.871894	3.17203e-09
ENSG00000270697	AC106791.2	lncRNA	royalblue	0.913092	3.12549e-11	0.862802	7.10035e-09
ENSG00000178233	TMEM151B	protein_coding	royalblue	0.863107	6.91746e-09	0.856446	1.20635e-08
ENSG00000235023	AP001626.1	lncRNA	royalblue	0.801365	5.09273e-07	0.847909	2.36591e-08
ENSG00000237973	MTCO1P12	unprocessed_pseudogene	royalblue	0.83102	8.0107e-08	0.840342	4.15747e-08
ENSG00000271547	AC117498.3	processed_pseudogene	royalblue	0.894358	3.23138e-10	0.839876	4.30019e-08
ENSG00000213171	LINGO4	protein_coding	royalblue	0.81145	2.81533e-07	0.837819	4.98483e-08
ENSG00000114854	TNNC1	protein_coding	royalblue	0.89044	4.98443e-10	0.832339	7.31848e-08
ENSG00000223715	LINC01208	lncRNA	royalblue	0.856402	1.21072e-08	0.828808	9.30604e-08
ENSG00000232461	AC092920.1	lncRNA	royalblue	0.836	5.67125e-08	0.821662	1.48895e-07
ENSG00000260672	AC100827.4	lncRNA	royalblue	0.799868	5.5451e-07	0.820489	1.60524e-07
ENSG00000134539	KLRD1	protein_coding	royalblue	0.805646	3.97627e-07	0.814355	2.358e-07
ENSG00000261379	AC010735.1	lncRNA	royalblue	0.765616	3.26716e-06	0.811722	2.76933e-07
ENSG00000267308	LINC01764	lncRNA	royalblue	0.805577	3.9923e-07	0.810541	2.97395e-07
ENSG00000259719	LINC02284	lncRNA	royalblue	0.75984	4.28015e-06	0.810447	2.99087e-07
ENSG00000165995	CACNB2	protein_coding	royalblue	0.729026	1.60977e-05	0.807403	3.58613e-07
ENSG00000172940	SLC22A13	protein_coding	royalblue	0.839425	4.44253e-08	0.80366	4.4633e-07
ENSG00000261617	LINC02177	lncRNA	royalblue	0.855146	1.34028e-08	0.802178	4.8612e-07
ENSG00000273664	AC010776.3	lncRNA	royalblue	0.743109	8.98977e-06	0.80137	5.09121e-07
ENSG00000272832	AC022296.3	lncRNA	royalblue	0.688494	7.18441e-05	0.801105	5.16865e-07
ENSG00000189433	GJB4	protein_coding	royalblue	0.834923	6.11702e-08	0.801079	5.17642e-07
ENSG00000250075	AC104806.2	lncRNA	royalblue	0.819764	1.68111e-07	0.797687	6.26956e-07
ENSG00000267774	AC010776.2	lncRNA	royalblue	0.752858	5.87481e-06	0.795724	6.99309e-07
ENSG00000278719	MCM8-AS1	lncRNA	royalblue	0.792986	8.12837e-07	0.795581	7.04865e-07
ENSG00000271424	AL157791.2	processed_pseudogene	royalblue	0.766503	3.13244e-06	0.795412	7.11502e-07
ENSG00000268949	MRPS17P1	processed_pseudogene	royalblue	0.73085	1.49576e-05	0.795199	7.19933e-07
ENSG00000234553	AC022431.2	lncRNA	royalblue	0.841657	3.77724e-08	0.792477	8.35703e-07
ENSG00000257604	AC027288.2	processed_pseudogene	royalblue	0.747658	7.38887e-06	0.7865	1.15077e-06
ENSG00000257337	AC068888.1	lncRNA	royalblue	0.750605	6.49275e-06	0.786276	1.16447e-06
ENSG00000127561	SYNGR3	protein_coding	royalblue	0.735762	1.22377e-05	0.784605	1.27097e-06
ENSG00000250057	AC114781.2	lncRNA	royalblue	0.755658	5.18078e-06	0.783279	1.36167e-06
ENSG00000250137	AC093607.1	lncRNA	royalblue	0.794525	7.47165e-07	0.782896	1.38894e-06
ENSG00000189334	S100A14	protein_coding	royalblue	0.80419	4.32829e-07	0.782849	1.39232e-06
ENSG00000204653	ASPDH	protein_coding	royalblue	0.77289	2.29989e-06	0.782566	1.41282e-06
ENSG00000212027	MIR374B	miRNA	royalblue	0.741099	9.79104e-06	0.782366	1.42747e-06
ENSG00000267243	AC005381.1	lncRNA	royalblue	0.837834	4.97975e-08	0.782337	1.42964e-06
ENSG00000092758	COL9A3	protein_coding	royalblue	0.797628	6.29015e-07	0.774834	2.08938e-06
ENSG00000264932	AC115989.2	lncRNA	royalblue	0.770272	2.6135e-06	0.77444	2.13063e-06
ENSG00000138161	CUZD1	protein_coding	royalblue	0.796469	6.71017e-07	0.772775	2.31291e-06
ENSG00000269966	AL136164.2	lncRNA	royalblue	0.763176	3.66538e-06	0.772145	2.38553e-06
ENSG00000225972	MTND1P23	unprocessed_pseudogene	royalblue	0.792962	8.13907e-07	0.770721	2.55707e-06
ENSG00000215785	CFL1P6	processed_pseudogene	royalblue	0.705309	3.97959e-05	0.76808	2.90492e-06
ENSG00000255384	AP001267.2	lncRNA	royalblue	0.725227	1.87238e-05	0.763803	3.55915e-06
ENSG00000272374	Z97832.2	lncRNA	royalblue	0.694786	5.78602e-05	0.762308	3.81714e-06
ENSG00000223849	AL354893.1	processed_pseudogene	royalblue	0.677836	0.000102453	0.761013	4.05423e-06
ENSG00000279537	AC020658.7	TEC	royalblue	0.646188	0.000271447	0.758728	4.50484e-06
ENSG00000262902	MTCO1P40	processed_pseudogene	royalblue	0.778587	1.73127e-06	0.758083	4.63985e-06
ENSG00000258010	AC016705.1	lncRNA	royalblue	0.736728	1.17582e-05	0.754035	5.57355e-06
ENSG00000173083	HPSE	protein_coding	royalblue	0.713537	2.93659e-05	0.746338	7.82469e-06
ENSG00000275695	UBE2Q2P6	transcribed_unprocessed_pseudogene	royalblue	0.718921	2.3934e-05	0.743986	8.65883e-06
ENSG00000149654	CDH22	protein_coding	royalblue	0.793308	7.98683e-07	0.742885	9.07612e-06
ENSG00000247213	LINC01498	lncRNA	royalblue	0.691734	6.43098e-05	0.741663	9.55994e-06
ENSG00000278212	AC134878.2	unprocessed_pseudogene	royalblue	0.724274	1.94393e-05	0.741521	9.61773e-06
ENSG00000214650	AC073592.1	lncRNA	royalblue	0.613526	0.000665836	0.740259	1.01446e-05
ENSG00000255200	PGAM1P8	transcribed_processed_pseudogene	royalblue	0.701854	4.50784e-05	0.739699	1.03863e-05
ENSG00000258919	AL049836.1	lncRNA	royalblue	0.688998	7.06241e-05	0.73818	1.10686e-05
ENSG00000254164	AC008663.3	lncRNA	royalblue	0.724808	1.90351e-05	0.737473	1.13998e-05
ENSG00000114770	ABCC5	protein_coding	royalblue	0.677278	0.000104332	0.736271	1.19831e-05
ENSG00000244757	AL137024.1	lncRNA	royalblue	0.621959	0.000533201	0.735179	1.25356e-05
ENSG00000265728	AP001099.1	lncRNA	royalblue	0.61744	0.000601075	0.732974	1.37214e-05
ENSG00000149809	TM7SF2	protein_coding	royalblue	0.631376	0.000412897	0.723526	2.00182e-05
ENSG00000070444	MNT	protein_coding	royalblue	0.639609	0.000327911	0.721212	2.1908e-05
ENSG00000273056	AL354694.1	lncRNA	royalblue	0.58922	0.00122128	0.720847	2.222e-05
ENSG00000189280	GJB5	protein_coding	royalblue	0.70375	4.21073e-05	0.720692	2.23538e-05
ENSG00000160469	BRSK1	protein_coding	royalblue	0.765088	3.35001e-06	0.712996	2.99677e-05
ENSG00000134020	PEBP4	protein_coding	royalblue	0.774904	2.08218e-06	0.712904	3.0071e-05
ENSG00000270171	AL359881.3	lncRNA	royalblue	0.729268	1.59416e-05	0.710886	3.24232e-05
ENSG00000226604	PAPPA-AS2	lncRNA	royalblue	0.557179	0.00253575	0.710451	3.29508e-05
ENSG00000185338	SOCS1	protein_coding	royalblue	0.682265	8.85587e-05	0.709755	3.38111e-05
ENSG00000267070	AC026458.2	lncRNA	royalblue	0.691398	6.50575e-05	0.708094	3.59468e-05
ENSG00000253699	AC084128.1	lncRNA	royalblue	0.722291	2.10084e-05	0.70802	3.60434e-05
ENSG00000228376	GAS2L1P2	transcribed_processed_pseudogene	royalblue	0.694733	5.79684e-05	0.707151	3.72114e-05
ENSG00000234389	AC007278.1	lncRNA	royalblue	0.735882	1.21774e-05	0.705601	3.93754e-05
ENSG00000228038	VN1R51P	processed_pseudogene	royalblue	0.682834	8.69019e-05	0.700699	4.69775e-05
ENSG00000129437	KLK14	protein_coding	royalblue	0.653916	0.000216178	0.700112	4.79704e-05
ENSG00000238961	SNORA47	snoRNA	royalblue	0.669843	0.000132462	0.700004	4.81547e-05
ENSG00000188467	SLC24A5	protein_coding	royalblue	0.67513	0.000111858	0.69634	5.48035e-05
ENSG00000274751	AC120498.9	lncRNA	royalblue	0.556562	0.00256984	0.696106	5.52542e-05
ENSG00000189431	RASSF10	protein_coding	royalblue	0.686986	7.56107e-05	0.695558	5.63243e-05
ENSG00000215283	HMGB3P24	processed_pseudogene	royalblue	0.620125	0.000559892	0.694703	5.80293e-05
ENSG00000227638	HNRNPA1P14	processed_pseudogene	royalblue	0.588886	0.00123111	0.69366	6.01691e-05
ENSG00000090905	TNRC6A	protein_coding	royalblue	0.616651	0.000613676	0.693133	6.1278e-05
ENSG00000240800	NA	NA	royalblue	0.624388	0.000499563	0.689187	7.01718e-05
ENSG00000170558	CDH2	protein_coding	royalblue	0.664093	0.000158604	0.687597	7.40662e-05
ENSG00000013563	DNASE1L1	protein_coding	royalblue	0.66465	0.000155886	0.684758	8.14974e-05
ENSG00000102239	BRS3	protein_coding	royalblue	0.649143	0.000249002	0.683977	8.36541e-05
ENSG00000231533	AL078601.2	lncRNA	royalblue	0.740827	9.90443e-06	0.682606	8.75624e-05
ENSG00000274898	AC001226.1	lncRNA	royalblue	0.630781	0.000419727	0.682508	8.78483e-05
ENSG00000140948	ZCCHC14	protein_coding	royalblue	0.694441	5.85602e-05	0.678059	0.00010171
ENSG00000060709	RIMBP2	protein_coding	royalblue	0.642376	0.000303024	0.675509	0.000110497
ENSG00000261434	AC021087.4	lncRNA	royalblue	0.664742	0.000155443	0.67284	0.000120407
ENSG00000223678	AL356218.1	lncRNA	royalblue	0.591531	0.00115522	0.671868	0.000124203
ENSG00000163810	TGM4	protein_coding	royalblue	0.631523	0.000411225	0.670516	0.000129664
ENSG00000185028	LRRC14B	protein_coding	royalblue	0.659889	0.000180498	0.670162	0.000131129
ENSG00000236337	FMR1-IT1	lncRNA	royalblue	0.589256	0.00122024	0.668007	0.00014036
ENSG00000133878	DUSP26	protein_coding	royalblue	0.690984	6.59877e-05	0.666515	0.000147083
ENSG00000237176	AC079905.1	processed_pseudogene	royalblue	0.596053	0.00103481	0.666298	0.000148089
ENSG00000200345	RNU6-485P	snRNA	royalblue	0.676692	0.00010634	0.665595	0.000151369
ENSG00000229719	MIR194-2HG	lncRNA	royalblue	0.598808	0.000966924	0.665566	0.000151508
ENSG00000279582	NA	NA	royalblue	0.617187	0.000605094	0.664755	0.000155382
ENSG00000146221	TCTE1	protein_coding	royalblue	0.59785	0.000990086	0.663564	0.000161227
ENSG00000270933	AC010719.1	lncRNA	royalblue	0.596866	0.00101437	0.661145	0.000173698
ENSG00000230725	AL035252.2	lncRNA	royalblue	0.629538	0.000434307	0.659057	0.000185134
ENSG00000169057	MECP2	protein_coding	royalblue	0.567697	0.0020112	0.658932	0.000185842
ENSG00000183784	C9orf66	protein_coding	royalblue	0.535971	0.00395726	0.658931	0.000185849
ENSG00000184828	ZBTB7C	protein_coding	royalblue	0.736613	1.18144e-05	0.658756	0.000186839
ENSG00000126562	WNK4	protein_coding	royalblue	0.711966	3.11453e-05	0.658623	0.000187594
ENSG00000251061	LINC02512	lncRNA	royalblue	0.609802	0.000733028	0.658243	0.000189771
ENSG00000269009	SLC6A21P	processed_pseudogene	royalblue	0.608578	0.00075636	0.654291	0.000213768
ENSG00000270228	AC079880.1	processed_pseudogene	royalblue	0.528765	0.00457395	0.653988	0.000215714
ENSG00000173862	AC008080.1	lncRNA	royalblue	0.61363	0.000664046	0.651958	0.000229152
ENSG00000139988	RDH12	protein_coding	royalblue	0.643781	0.000291032	0.65089	0.00023651
ENSG00000100142	POLR2F	protein_coding	royalblue	0.53088	0.00438509	0.64902	0.000249903
ENSG00000270194	AC097359.2	lncRNA	royalblue	0.562037	0.00228046	0.648712	0.000252166
ENSG00000261669	AC008731.1	lncRNA	royalblue	0.583252	0.00140727	0.648292	0.000255293
ENSG00000174038	C9orf131	protein_coding	royalblue	0.623967	0.000505258	0.648069	0.000256963
ENSG00000228616	AF274858.2	lncRNA	royalblue	0.510851	0.00646992	0.6472	0.000263572
ENSG00000130822	PNCK	protein_coding	royalblue	0.570175	0.00190222	0.645218	0.000279195
ENSG00000168509	HFE2	protein_coding	royalblue	0.682382	8.82173e-05	0.644119	0.000288203
ENSG00000221520	MIR1285-1	miRNA	royalblue	0.667629	0.000142037	0.643139	0.000296457
ENSG00000178201	VN1R1	protein_coding	royalblue	0.528119	0.00463307	0.638387	0.000339467
ENSG00000182308	DCAF4L1	protein_coding	royalblue	0.542194	0.00348312	0.636165	0.000361391
ENSG00000227083	L29074.1	lncRNA	royalblue	0.615193	0.000637557	0.635853	0.000364559
ENSG00000143257	NR1I3	protein_coding	royalblue	0.623529	0.000511244	0.633867	0.000385358
ENSG00000273448	AC006480.2	lncRNA	royalblue	0.550698	0.00291415	0.632147	0.000404195
ENSG00000238109	AC004893.1	processed_pseudogene	royalblue	0.584153	0.00137772	0.63058	0.000422051
ENSG00000277496	AL357033.4	lncRNA	royalblue	0.528365	0.0046105	0.628602	0.000445581
ENSG00000225940	C5orf67	protein_coding	royalblue	0.656241	0.000201612	0.626963	0.000465938
ENSG00000142233	NTN5	protein_coding	royalblue	0.63194	0.000406517	0.626722	0.000469001
ENSG00000118298	CA14	protein_coding	royalblue	0.586842	0.00129267	0.626603	0.00047052
ENSG00000117707	PROX1	protein_coding	royalblue	0.684663	8.17576e-05	0.624643	0.000496134
ENSG00000145284	SCD5	protein_coding	royalblue	0.696177	5.51169e-05	0.624377	0.000499715
ENSG00000275759	AC026367.3	lncRNA	royalblue	0.667647	0.000141957	0.6222	0.000529784
ENSG00000274395	AC126177.8	lncRNA	royalblue	0.615867	0.000626422	0.622143	0.000530581
ENSG00000253978	CTB-178M22.2	lncRNA	royalblue	0.63431	0.000380631	0.621316	0.000542427
ENSG00000235330	RPL12P25	transcribed_processed_pseudogene	royalblue	0.496506	0.00843119	0.620047	0.000561063
ENSG00000256650	RERG-IT1	lncRNA	royalblue	0.55277	0.00278826	0.618415	0.000585827
ENSG00000225527	AL450384.1	lncRNA	royalblue	0.478774	0.0115223	0.616073	0.00062304
ENSG00000235687	LINC00993	transcribed_unprocessed_pseudogene	royalblue	0.519266	0.00551006	0.614067	0.000656549
ENSG00000223726	AL020994.1	lncRNA	royalblue	0.54227	0.00347766	0.61392	0.000659066
ENSG00000107099	DOCK8	protein_coding	royalblue	0.56131	0.00231722	0.611458	0.000702457
ENSG00000036828	CASR	protein_coding	royalblue	0.667894	0.000140861	0.610758	0.000715231
ENSG00000163064	EN1	protein_coding	royalblue	0.674879	0.000112767	0.610244	0.000724745
ENSG00000278869	BX539320.1	lncRNA	royalblue	0.545484	0.00325267	0.60798	0.000767988
ENSG00000129744	ART1	protein_coding	royalblue	0.575376	0.00168986	0.607223	0.000782928
ENSG00000269976	AC012065.3	lncRNA	royalblue	0.60986	0.00073194	0.60507	0.000826836
ENSG00000277135	AC012409.3	lncRNA	royalblue	0.643478	0.000293577	0.604872	0.000830977
ENSG00000255946	AC069234.1	lncRNA	royalblue	0.553266	0.00275878	0.60452	0.000838387
ENSG00000234177	LINC01114	lncRNA	royalblue	0.626834	0.000467578	0.604507	0.000838675
ENSG00000259728	LINC00933	transcribed_unprocessed_pseudogene	royalblue	0.472345	0.0128538	0.602898	0.00087328
ENSG00000268533	AC003002.2	protein_coding	royalblue	0.58645	0.00130479	0.602571	0.000880474
ENSG00000206181	ELOA2	protein_coding	royalblue	0.545817	0.00323008	0.602362	0.000885102
ENSG00000224324	THAP5P1	processed_pseudogene	royalblue	0.561118	0.002327	0.600844	0.000919289
ENSG00000229044	AL451070.1	lncRNA	royalblue	0.579125	0.00154979	0.598658	0.000970526
ENSG00000273628	AL354798.1	unprocessed_pseudogene	royalblue	0.669104	0.000135592	0.597695	0.000993869
ENSG00000224165	DNAJC27-AS1	lncRNA	royalblue	0.562252	0.0022697	0.596895	0.00101363
ENSG00000273424	AL008582.1	lncRNA	royalblue	0.548435	0.00305715	0.595719	0.00104331
ENSG00000206530	CFAP44	protein_coding	royalblue	0.602305	0.000886358	0.594868	0.00106527
ENSG00000169933	FRMPD4	protein_coding	royalblue	0.501577	0.00768762	0.590724	0.00117792
ENSG00000213514	AL731556.1	processed_pseudogene	royalblue	0.548314	0.00306498	0.589983	0.00119912
ENSG00000198355	PIM3	protein_coding	royalblue	0.565527	0.00211102	0.587526	0.00127178
ENSG00000235911	AC019055.1	lncRNA	royalblue	0.514494	0.00603838	0.5874	0.00127562
ENSG00000219361	RPSAP72	processed_pseudogene	royalblue	0.562269	0.00226886	0.586652	0.00129855
ENSG00000010404	IDS	protein_coding	royalblue	0.604517	0.000838448	0.586532	0.00130226
ENSG00000144852	NR1I2	protein_coding	royalblue	0.617424	0.000601332	0.583918	0.00138539
ENSG00000144671	SLC22A14	protein_coding	royalblue	0.64886	0.000251077	0.583821	0.00138854
ENSG00000243025	MTAPP1	processed_pseudogene	royalblue	0.560912	0.00233753	0.582359	0.00143712
ENSG00000271384	AL161729.3	lncRNA	royalblue	0.517772	0.0056711	0.582067	0.001447
ENSG00000206762	RNU6-418P	snRNA	royalblue	0.526257	0.0048069	0.582041	0.00144789
ENSG00000222640	RNU2-51P	snRNA	royalblue	0.609423	0.000740177	0.581799	0.00145612
ENSG00000240890	AC020633.1	processed_pseudogene	royalblue	0.487775	0.00985269	0.581247	0.00147503
ENSG00000258933	LINC02279	lncRNA	royalblue	0.587655	0.00126789	0.580248	0.00150982
ENSG00000227456	LINC00310	lncRNA	royalblue	0.563424	0.00221181	0.578839	0.0015601
ENSG00000111424	VDR	protein_coding	royalblue	0.490298	0.00942283	0.578735	0.00156387
ENSG00000268545	VN1R107P	unprocessed_pseudogene	royalblue	0.478446	0.0115875	0.578713	0.0015647
ENSG00000260750	AC092720.1	lncRNA	royalblue	0.558033	0.00248919	0.577871	0.00159548
ENSG00000180347	CCDC129	protein_coding	royalblue	0.567459	0.00202195	0.577153	0.00162217
ENSG00000123892	RAB38	protein_coding	royalblue	0.497642	0.00825962	0.57592	0.0016689
ENSG00000173702	MUC13	protein_coding	royalblue	0.585912	0.00132156	0.573557	0.0017617
ENSG00000233825	AL391839.2	lncRNA	royalblue	0.638471	0.000338659	0.572912	0.00178776
ENSG00000213014	VN2R17P	processed_pseudogene	royalblue	0.480463	0.0111922	0.568895	0.00195784
ENSG00000246922	UBAP1L	protein_coding	royalblue	0.451612	0.0180456	0.56549	0.00211277
ENSG00000010318	PHF7	protein_coding	royalblue	0.478525	0.0115718	0.5641	0.00217894
ENSG00000196796	NPIPB10P	unprocessed_pseudogene	royalblue	0.602443	0.000883302	0.562342	0.00226523
ENSG00000273007	AC021205.3	lncRNA	royalblue	0.484599	0.0104171	0.558903	0.00244249
ENSG00000023839	ABCC2	protein_coding	royalblue	0.495176	0.00863594	0.558507	0.00246365
ENSG00000183134	PTGDR2	protein_coding	royalblue	0.623458	0.000512221	0.556988	0.00254627
ENSG00000268201	AC020915.3	lncRNA	royalblue	0.418079	0.0299983	0.553601	0.00273906
ENSG00000272892	AL133551.1	lncRNA	royalblue	0.462281	0.0151929	0.552782	0.00278752
ENSG00000164049	FBXW12	protein_coding	royalblue	0.584677	0.00136078	0.552765	0.00278854
ENSG00000253771	TPTE2P1	transcribed_unprocessed_pseudogene	royalblue	0.517835	0.00566423	0.550686	0.00291486
ENSG00000228484	AL137025.1	lncRNA	royalblue	0.516067	0.00585964	0.550453	0.00292935
ENSG00000207789	MIR26A2	miRNA	royalblue	0.532655	0.00423166	0.549623	0.00298135
ENSG00000280181	AC025262.2	TEC	royalblue	0.487875	0.00983525	0.547264	0.00313352
ENSG00000121769	FABP3	protein_coding	royalblue	0.481994	0.0108998	0.546369	0.00319295
ENSG00000254614	AP003068.2	lncRNA	royalblue	0.532493	0.00424549	0.545458	0.00325446
ENSG00000270863	DDX55P1	processed_pseudogene	royalblue	0.505396	0.00716469	0.54427	0.00333615
ENSG00000248401	AC114781.1	processed_pseudogene	royalblue	0.526717	0.00476342	0.543408	0.00339654
ENSG00000169155	ZBTB43	protein_coding	royalblue	0.484114	0.0105056	0.543112	0.00341745
ENSG00000260918	AC107398.3	lncRNA	royalblue	0.54601	0.00321709	0.53873	0.00374074
ENSG00000198742	SMURF1	protein_coding	royalblue	0.50297	0.00749332	0.53682	0.00388952
ENSG00000175267	VWA3A	protein_coding	royalblue	0.480075	0.0112673	0.536683	0.00390044
ENSG00000228420	LINC01768	lncRNA	royalblue	0.441951	0.0209951	0.536299	0.00393099
ENSG00000135477	KRT87P	transcribed_unprocessed_pseudogene	royalblue	0.577874	0.00159537	0.533948	0.00412278
ENSG00000197213	ZSCAN5B	protein_coding	royalblue	0.552741	0.00278994	0.533424	0.00416661
ENSG00000228709	LINC02575	lncRNA	royalblue	0.590922	0.00117233	0.532652	0.00423194
ENSG00000230736	AL021937.1	lncRNA	royalblue	0.466086	0.0142703	0.529528	0.00450502
ENSG00000273027	AL844908.2	lncRNA	royalblue	0.445228	0.0199535	0.528694	0.00458045
ENSG00000215447	BX322557.1	lncRNA	royalblue	0.509089	0.00668791	0.528298	0.00461661
ENSG00000120664	SPART-AS1	lncRNA	royalblue	0.545762	0.00323381	0.527987	0.00464515
ENSG00000203859	HSD3B2	protein_coding	royalblue	0.555648	0.00262112	0.527152	0.00472261
ENSG00000166532	RIMKLB	protein_coding	royalblue	0.618835	0.000579369	0.526938	0.00474268
ENSG00000280362	AC084759.3	TEC	royalblue	0.52179	0.00524677	0.526006	0.00483077
ENSG00000208772	SNORD94	snoRNA	royalblue	0.444636	0.0201384	0.522543	0.00517036
ENSG00000271973	AC141002.1	lncRNA	royalblue	0.491597	0.00920762	0.521939	0.0052316
ENSG00000174527	MYO1H	protein_coding	royalblue	0.492461	0.00906682	0.52177	0.00524883
ENSG00000124145	SDC4	protein_coding	royalblue	0.474819	0.0123271	0.521378	0.00528903
ENSG00000249506	ZEB2P1	transcribed_processed_pseudogene	royalblue	0.524081	0.00501708	0.518408	0.00560204
ENSG00000229388	LINC01715	lncRNA	royalblue	0.491762	0.00918055	0.517708	0.00567799
ENSG00000261790	AC005606.2	lncRNA	royalblue	0.412657	0.0324247	0.517508	0.00569991
ENSG00000275540	AC011477.7	unprocessed_pseudogene	royalblue	0.446281	0.0196278	0.517454	0.00570581
ENSG00000232411	AC009495.2	lncRNA	royalblue	0.513216	0.00618698	0.516893	0.00576769
ENSG00000264608	AC005726.4	lncRNA	royalblue	0.57581	0.00167313	0.516595	0.00580066
ENSG00000256967	AC018653.3	lncRNA	royalblue	0.52027	0.00540399	0.512381	0.00628561
ENSG00000257141	AC126177.2	lncRNA	royalblue	0.494673	0.00871437	0.510894	0.00646475
ENSG00000226200	SGMS1-AS1	lncRNA	royalblue	0.472646	0.0127888	0.509384	0.00665096
ENSG00000197430	OPALIN	protein_coding	royalblue	0.436869	0.0226979	0.50332	0.00744517
ENSG00000257829	AC121757.1	lncRNA	royalblue	0.533858	0.00413028	0.501908	0.00764114
ENSG00000081148	IMPG2	protein_coding	royalblue	0.580729	0.00149301	0.500336	0.00786434
ENSG00000179774	ATOH7	protein_coding	royalblue	0.505096	0.0072047	0.499762	0.00794726
ENSG00000181625	SLX1B	protein_coding	royalblue	0.466231	0.0142362	0.498496	0.00813261
ENSG00000008300	CELSR3	protein_coding	royalblue	0.392399	0.0429179	0.498104	0.00819061
ENSG00000262966	AC005695.1	lncRNA	royalblue	0.468919	0.0136139	0.498098	0.00819155
ENSG00000240449	AC005586.1	lncRNA	royalblue	0.355729	0.0685994	0.496784	0.00838902
ENSG00000258910	LINC01956	lncRNA	royalblue	0.539587	0.00367549	0.493881	0.00883922
ENSG00000226386	PARD3-AS1	lncRNA	royalblue	0.432018	0.024427	0.493647	0.00887642
ENSG00000236830	CBR3-AS1	lncRNA	royalblue	0.404093	0.0365755	0.492927	0.00899159
ENSG00000271631	AL139041.1	lncRNA	royalblue	0.399394	0.0390275	0.491435	0.00923415
ENSG00000235790	AC114488.2	lncRNA	royalblue	0.370661	0.0570008	0.488126	0.00979195
ENSG00000275223	AL121906.2	lncRNA	royalblue	0.442021	0.0209722	0.484507	0.0104338
ENSG00000196131	VN1R2	protein_coding	royalblue	0.400956	0.0381984	0.483433	0.0106309
ENSG00000272941	AC083862.2	lncRNA	royalblue	0.468666	0.0136715	0.481379	0.0110166
ENSG00000183780	SLC35F3	protein_coding	royalblue	0.373926	0.0546816	0.478436	0.0115894
ENSG00000248256	OCIAD1-AS1	lncRNA	royalblue	0.508605	0.00674881	0.477786	0.0117192
ENSG00000274292	AC084018.2	lncRNA	royalblue	0.390731	0.0438895	0.472888	0.0127366
ENSG00000254099	AC005740.3	lncRNA	royalblue	0.451075	0.0182	0.470892	0.0131718
ENSG00000231827	AL513523.2	transcribed_unprocessed_pseudogene	royalblue	0.385756	0.0468914	0.467749	0.0138819
ENSG00000228599	RPL7P52	processed_pseudogene	royalblue	0.440032	0.0216255	0.463926	0.0147882
ENSG00000219355	RPL31P52	processed_pseudogene	royalblue	0.480941	0.0111003	0.463909	0.0147923
ENSG00000256381	AC005832.1	lncRNA	royalblue	0.375676	0.0534695	0.461974	0.0152694
ENSG00000279469	AC109454.4	TEC	royalblue	0.456423	0.016709	0.461061	0.015499
ENSG00000215022	AL008729.1	lncRNA	royalblue	0.462389	0.015166	0.460928	0.0155326
ENSG00000270880	AC128687.1	processed_pseudogene	royalblue	0.362917	0.0628082	0.457956	0.0163007
ENSG00000206140	TMEM191C	protein_coding	royalblue	0.460709	0.0155881	0.457729	0.0163608
ENSG00000261996	AC004706.1	lncRNA	royalblue	0.509442	0.00664372	0.45409	0.0173467
ENSG00000236358	AL355472.3	lncRNA	royalblue	0.327891	0.0949838	0.453861	0.0174104
ENSG00000239096	snoU13	snoRNA	royalblue	0.409011	0.0341426	0.451591	0.0180517
ENSG00000177791	MYOZ1	protein_coding	royalblue	0.466646	0.0141385	0.445758	0.019789
ENSG00000222038	POTEJ	protein_coding	royalblue	0.465045	0.0145181	0.444797	0.0200879
ENSG00000226741	LINC02554	lncRNA	royalblue	0.412909	0.0323085	0.439809	0.0216995
ENSG00000279584	AC005593.1	TEC	royalblue	0.298306	0.1307	0.439175	0.0219117
ENSG00000245532	NEAT1	lncRNA	royalblue	0.384287	0.0478085	0.43869	0.0220755
ENSG00000196436	NPIPB15	protein_coding	royalblue	0.383273	0.0484496	0.436997	0.0226539
ENSG00000248399	AL645924.1	lncRNA	royalblue	0.393799	0.0421159	0.435691	0.0231084
ENSG00000213386	AC022217.1	processed_pseudogene	royalblue	0.365534	0.0607967	0.432185	0.0243659
ENSG00000187889	FYB2	protein_coding	royalblue	0.449287	0.0187224	0.432153	0.0243775
ENSG00000279075	AC091965.5	TEC	royalblue	0.387337	0.0459203	0.431918	0.0244637
ENSG00000167774	AC010323.1	protein_coding	royalblue	0.444767	0.0200974	0.43121	0.024725
ENSG00000213078	AL390955.1	processed_pseudogene	royalblue	0.4446	0.0201497	0.425617	0.0268707
ENSG00000274351	AL137000.1	unprocessed_pseudogene	royalblue	0.463315	0.0149375	0.422038	0.028321
ENSG00000275457	AL117332.1	lncRNA	royalblue	0.324124	0.09907	0.416311	0.0307728
ENSG00000235052	AL021154.1	lncRNA	royalblue	0.316723	0.107481	0.415985	0.0309175
ENSG00000066468	FGFR2	protein_coding	royalblue	0.311374	0.113883	0.415649	0.0310669
ENSG00000229585	RPL21P44	processed_pseudogene	royalblue	0.340121	0.0825861	0.411086	0.0331561
ENSG00000139182	CLSTN3	protein_coding	royalblue	0.435339	0.0232321	0.407247	0.0350001
ENSG00000258472	AC005726.2	protein_coding	royalblue	0.364771	0.061378	0.406228	0.0355028
ENSG00000112212	TSPO2	protein_coding	royalblue	0.396847	0.0404103	0.405193	0.0360199
ENSG00000128594	LRRC4	protein_coding	royalblue	0.377825	0.0520097	0.399772	0.0388257
ENSG00000273399	AL159169.3	lncRNA	royalblue	0.295963	0.133897	0.397828	0.0398728
ENSG00000227050	AL512288.1	lncRNA	royalblue	0.437423	0.0225069	0.39268	0.0427558
ENSG00000171174	RBKS	protein_coding	royalblue	0.463519	0.0148874	0.389812	0.0444324
ENSG00000178636	AC092656.1	transcribed_processed_pseudogene	royalblue	0.388106	0.045454	0.386882	0.0461986
ENSG00000259953	AL138756.1	lncRNA	royalblue	0.234721	0.238603	0.38687	0.0462059
ENSG00000236098	AC097059.2	lncRNA	royalblue	0.353986	0.0700637	0.37703	0.052546
ENSG00000228397	LINC01635	lncRNA	royalblue	0.221674	0.266463	0.376729	0.0527501
ENSG00000223834	AL161935.1	lncRNA	royalblue	0.18707	0.350133	0.349874	0.0736147
ENSG00000233332	AL122008.3	lncRNA	royalblue	0.167933	0.402432	0.33697	0.0856554
ENSG00000154655	L3MBTL4	protein_coding	royalblue	-0.334795	0.0878239	-0.370828	0.0568803
ENSG00000247624	CPEB2-AS1	lncRNA	red	0.395825	0.0409756	0.502218	0.00759766
ENSG00000113262	GRM6	protein_coding	red	0.349518	0.0739279	0.360896	0.0643965
ENSG00000223855	HRAT92	lncRNA	red	0.324089	0.0991086	0.468573	0.0136928
ENSG00000047634	SCML1	protein_coding	red	0.316391	0.10787	0.440312	0.0215325
ENSG00000266846	AP001021.2	lncRNA	red	-0.290613	0.141408	-0.255935	0.197559
ENSG00000254433	AP001001.1	lncRNA	red	0.270751	0.171949	0.294883	0.135389
ENSG00000272573	MUSTN1	protein_coding	red	0.257358	0.194992	0.290149	0.142073
ENSG00000281359	NA	NA	red	-0.242031	0.223869	-0.111405	0.580118
ENSG00000272574	AL596325.2	lncRNA	red	0.231887	0.244483	0.349295	0.074125
ENSG00000259285	AC025431.1	lncRNA	red	-0.228057	0.252582	-0.0978516	0.627279
ENSG00000174453	VWC2L	protein_coding	red	0.224366	0.260551	0.309491	0.116202
ENSG00000243918	EIF4BP8	processed_pseudogene	red	-0.215533	0.280276	-0.112303	0.577048
ENSG00000236449	AC010894.3	lncRNA	red	0.215413	0.28055	0.293078	0.13791
ENSG00000254990	AP001781.2	lncRNA	red	0.209748	0.293697	0.268636	0.175455
ENSG00000272431	AC104117.5	lncRNA	red	-0.20829	0.297141	-0.149471	0.456805
ENSG00000279019	AC009090.4	TEC	red	0.201749	0.312908	0.333973	0.0886542
ENSG00000275572	GRIFIN	protein_coding	red	-0.196085	0.326971	-0.0756016	0.707819
ENSG00000223901	AP001469.1	lncRNA	red	0.195661	0.328037	0.241577	0.224765
ENSG00000184058	TBX1	protein_coding	red	-0.176615	0.378184	-0.120527	0.549284
ENSG00000264125	AC104984.1	lncRNA	red	-0.176084	0.379642	-0.0716479	0.722489
ENSG00000103154	NECAB2	protein_coding	red	-0.175874	0.38022	-0.046535	0.817714
ENSG00000236472	AC002401.1	lncRNA	red	-0.173898	0.38568	-0.0789927	0.695318
ENSG00000259668	AC066613.1	lncRNA	red	0.170138	0.396192	0.313712	0.11105
ENSG00000270808	AC022400.4	processed_pseudogene	red	0.167397	0.403958	0.174361	0.384397
ENSG00000207313	SNORA2B	snoRNA	red	0.166098	0.407667	0.243579	0.220828
ENSG00000113763	UNC5A	protein_coding	red	-0.165941	0.408118	-0.131767	0.51237
ENSG00000197692	CBX3P7	processed_pseudogene	red	-0.165116	0.410486	-0.0542115	0.788269
ENSG00000105974	CAV1	protein_coding	red	-0.162334	0.418522	-0.0165839	0.934567
ENSG00000160180	TFF3	protein_coding	red	-0.159319	0.427334	-0.112334	0.576944
ENSG00000237928	NFIA-AS2	lncRNA	red	-0.159079	0.42804	-0.101479	0.614505
ENSG00000157856	DRC1	protein_coding	red	0.158595	0.429463	0.280107	0.157034
ENSG00000250692	AC008667.2	lncRNA	red	0.15741	0.432963	0.293993	0.136627
ENSG00000247572	CKMT2-AS1	lncRNA	red	0.156046	0.437012	0.204347	0.306586
ENSG00000177947	ODF3	protein_coding	red	-0.155811	0.437711	-0.0502459	0.803447
ENSG00000181778	TMEM252	protein_coding	red	-0.149681	0.456166	-0.0625072	0.756766
ENSG00000103310	ZP2	protein_coding	red	-0.144511	0.472045	-0.118625	0.55565
ENSG00000179935	LINC00652	lncRNA	red	0.144176	0.473081	0.280547	0.156355
ENSG00000189233	NUGGC	protein_coding	red	-0.143678	0.474627	-0.0576203	0.775281
ENSG00000205562	AL049775.1	lncRNA	red	-0.1361	0.498474	-0.12257	0.542484
ENSG00000187791	FAM205C	protein_coding	red	-0.132966	0.508506	-0.0485635	0.809908
ENSG00000159708	LRRC36	protein_coding	red	-0.13291	0.508688	-0.0417473	0.836205
ENSG00000237609	AF064858.2	lncRNA	red	0.130276	0.517198	0.14992	0.455437
ENSG00000221628	MIR1302-4	miRNA	red	-0.129222	0.520623	-0.0476449	0.813441
ENSG00000261575	AC005829.1	transcribed_unprocessed_pseudogene	red	-0.127688	0.525625	-0.0498458	0.804983
ENSG00000204580	DDR1	protein_coding	red	-0.126687	0.528903	-0.0419864	0.835279
ENSG00000259351	AC015914.1	lncRNA	red	0.126105	0.530814	0.209414	0.294483
ENSG00000013297	CLDN11	protein_coding	red	-0.122084	0.5441	-0.0228282	0.910014
ENSG00000139220	PPFIA2	protein_coding	red	-0.121375	0.546458	-0.0231327	0.908819
ENSG00000100985	MMP9	protein_coding	red	-0.12124	0.546909	-0.0775027	0.700802
ENSG00000176956	LY6H	protein_coding	red	-0.120964	0.547826	-0.0283298	0.888448
ENSG00000248468	AC107027.1	lncRNA	red	-0.120228	0.550284	-0.0517199	0.797797
ENSG00000253852	AC011383.1	lncRNA	red	-0.119189	0.553759	-0.0485135	0.8101
ENSG00000083067	TRPM3	protein_coding	red	-0.117108	0.560753	-0.0302556	0.880916
ENSG00000280118	AC090983.1	TEC	red	-0.116473	0.562894	-0.000208955	0.999175
ENSG00000253524	AC124290.1	lncRNA	red	-0.111167	0.580934	-0.0321936	0.873347
ENSG00000243238	IGKV2-30	IG_V_gene	red	-0.108512	0.590052	-0.0782441	0.698071
ENSG00000145777	TSLP	protein_coding	red	-0.107645	0.593044	-0.0815609	0.685901
ENSG00000236526	AL035448.1	lncRNA	red	0.104373	0.604394	0.145633	0.468573
ENSG00000137270	GCM1	protein_coding	red	-0.101431	0.614675	-0.0413248	0.837841
ENSG00000225075	AL603832.1	lncRNA	red	-0.101015	0.616132	0.0388411	0.847471
ENSG00000197580	BCO2	protein_coding	red	-0.100408	0.618265	-0.0679317	0.736366
ENSG00000157445	CACNA2D3	protein_coding	red	-0.0994259	0.621722	-0.0814191	0.68642
ENSG00000243319	FGF14-IT1	lncRNA	red	-0.0993499	0.62199	-0.0137825	0.945602
ENSG00000231252	AC099792.1	lncRNA	red	-0.0978993	0.62711	-0.0266226	0.895133
ENSG00000213376	GAPDHP71	processed_pseudogene	red	-0.0978895	0.627145	-0.0499469	0.804595
ENSG00000117477	CCDC181	protein_coding	red	0.0960004	0.633838	0.121378	0.546448
ENSG00000255572	AC018653.1	lncRNA	red	0.0935387	0.642603	0.205295	0.304298
ENSG00000161905	ALOX15	protein_coding	red	-0.0909169	0.651989	-0.00284387	0.988768
ENSG00000259887	AC068987.1	lncRNA	red	-0.0905992	0.653131	-0.0482847	0.81098
ENSG00000165091	TMC1	protein_coding	red	-0.0871638	0.665516	-0.0370574	0.8544
ENSG00000257513	NPIPB1P	transcribed_unprocessed_pseudogene	red	-0.0798825	0.69205	-0.0162778	0.935772
ENSG00000271155	AL161729.1	lncRNA	red	0.0772976	0.701558	0.206567	0.301245
ENSG00000165899	OTOGL	protein_coding	red	-0.0760625	0.706116	0.0258819	0.898035
ENSG00000158458	NRG2	protein_coding	red	0.0738112	0.71445	0.232595	0.243006
ENSG00000255160	AC009652.1	lncRNA	red	-0.0698377	0.729238	0.015333	0.939493
ENSG00000267096	AC008735.1	lncRNA	red	-0.0680965	0.735749	0.0338309	0.866961
ENSG00000220267	ACTBP8	processed_pseudogene	red	-0.065291	0.746276	0.0221194	0.912798
ENSG00000225770	RPS29P3	processed_pseudogene	red	0.0651611	0.746764	0.113837	0.571825
ENSG00000137968	SLC44A5	protein_coding	red	-0.0611243	0.761992	0.0289189	0.886143
ENSG00000251187	AC010261.2	lncRNA	red	0.0601107	0.76583	0.19204	0.337245
ENSG00000270533	CR382285.1	transcribed_processed_pseudogene	red	-0.0592127	0.769234	0.0610694	0.7622
ENSG00000070985	TRPM5	protein_coding	red	-0.0584416	0.772161	0.0457452	0.820758
ENSG00000197568	HHLA3	protein_coding	red	-0.0545858	0.78684	0.0363697	0.857074
ENSG00000271086	NAMA	lncRNA	red	-0.0483392	0.81077	0.0736386	0.715091
ENSG00000237352	LINC01358	lncRNA	red	0.0414118	0.837504	0.112512	0.576335
ENSG00000170571	EMB	protein_coding	red	-0.0395855	0.844582	0.0444029	0.825938
ENSG00000268049	AC012313.2	lncRNA	red	0.038442	0.84902	0.150065	0.454999
ENSG00000213519	AC132008.1	processed_pseudogene	red	0.0384108	0.849141	0.0796862	0.692771
ENSG00000104899	AMH	protein_coding	red	0.0359154	0.858842	0.188808	0.345592
ENSG00000198719	DLL1	protein_coding	red	-0.0337861	0.867136	0.0258508	0.898157
ENSG00000272161	AL589739.1	lncRNA	red	-0.0324633	0.872295	0.059354	0.768698
ENSG00000206077	ZDHHC11B	protein_coding	red	0.0317153	0.875215	0.178753	0.372343
ENSG00000269091	AC010624.3	lncRNA	red	-0.0234211	0.907687	0.0320017	0.874096
ENSG00000278921	EPB41L4A-AS2	lncRNA	red	0.0220516	0.913064	0.0708004	0.725646
ENSG00000226942	IL9RP3	unprocessed_pseudogene	red	-0.0194629	0.923238	0.074687	0.711204
ENSG00000204572	KRTAP5-10	protein_coding	red	-0.0166304	0.934384	0.0927496	0.645423
ENSG00000035664	DAPK2	protein_coding	red	0.0125695	0.950384	0.0538855	0.789514
ENSG00000250608	AC010210.1	lncRNA	red	0.012563	0.950409	0.135932	0.49901
ENSG00000244411	KRTAP5-7	protein_coding	red	0.0118497	0.953222	0.116562	0.562594
ENSG00000233155	HMGA1P8	processed_pseudogene	red	-0.00617	0.975634	0.0365487	0.856378
ENSG00000274501	AL121845.4	lncRNA	red	-0.00571944	0.977413	0.128573	0.522737
ENSG00000277494	GPIHBP1	protein_coding	red	0.0054279	0.978564	0.00910508	0.964049
ENSG00000266124	MIR5587	miRNA	red	0.000742455	0.997068	0.128775	0.522077

## Sheet: KICH_N
geneId	geneSymbol	geneBiotype	moduleColor	GS.stage_tnm_N	p.GS.stage_tnm_N	MM.red	p.MM.red	MM.green	p.MM.green	MM.royalblue	p.MM.royalblue
ENSG00000238178	AC078993.1	lncRNA	green	0.660351	0.00017797	0.109295	0.587355	0.979529	6.35473e-19	-0.0627464	0.755863
ENSG00000119547	ONECUT2	protein_coding	green	0.635812	0.000364982	0.0751903	0.709341	0.976583	3.35881e-18	-0.0780422	0.698814
ENSG00000132681	ATP1A4	protein_coding	green	0.612469	0.000684336	0.082638	0.681965	0.974802	8.31647e-18	-0.0801811	0.690955
ENSG00000126010	GRPR	protein_coding	green	0.678582	9.99857e-05	0.159441	0.426974	0.972609	2.33315e-17	-0.0562031	0.780674
ENSG00000182798	MAGEB17	protein_coding	green	0.676242	0.000107904	0.120698	0.548714	0.968447	1.33665e-16	0.0134823	0.946786
ENSG00000207138	RNU6-869P	snRNA	green	0.639639	0.000327639	0.0689188	0.732672	0.96814	1.50651e-16	-0.0229798	0.909419
ENSG00000054938	CHRDL2	protein_coding	green	0.610077	0.00072786	0.117941	0.557949	0.966311	2.99621e-16	-0.097708	0.627787
ENSG00000266968	AC023421.1	lncRNA	green	0.703224	4.29136e-05	0.200781	0.315284	0.960271	2.27855e-15	-0.090655	0.65293
ENSG00000133636	NTS	protein_coding	green	0.610373	0.000722358	0.0723808	0.719763	0.954953	1.06456e-14	-0.10162	0.614011
ENSG00000231621	AC013264.1	lncRNA	green	0.622748	0.000522058	0.0817245	0.685303	0.945292	1.14586e-13	-0.118258	0.556883
ENSG00000265944	LINC01387	lncRNA	green	0.562314	0.00226662	0.111526	0.579703	0.941869	2.40148e-13	-0.0865736	0.667653
ENSG00000162891	IL20	protein_coding	green	0.577635	0.00160422	0.0904543	0.653651	0.941805	2.43402e-13	-0.107833	0.592394
ENSG00000237989	LINC01679	lncRNA	green	0.642	0.000306306	0.134624	0.503185	0.932727	1.41796e-12	-0.105883	0.599143
ENSG00000228016	RAPGEF4-AS1	lncRNA	green	0.572519	0.00180382	0.0379693	0.850856	0.931668	1.71361e-12	-0.0535925	0.790633
ENSG00000109424	UCP1	protein_coding	green	0.581372	0.00147075	0.0876141	0.663888	0.928094	3.17794e-12	-0.0814388	0.686348
ENSG00000122691	TWIST1	protein_coding	green	0.570006	0.00190949	0.0745187	0.711828	0.925042	5.2543e-12	-0.108817	0.589002
ENSG00000224614	TNK2-AS1	lncRNA	green	0.588833	0.00123267	0.0430235	0.831267	0.921194	9.6179e-12	-0.0553545	0.783908
ENSG00000164082	GRM2	protein_coding	green	0.597502	0.000998612	0.124463	0.53622	0.92061	1.05138e-11	-0.107257	0.594387
ENSG00000258425	AC013451.1	lncRNA	green	0.596184	0.00103149	0.11119	0.580853	0.902107	1.30195e-10	-0.0832977	0.679558
ENSG00000150471	ADGRL3	protein_coding	green	0.539404	0.00368933	0.0239706	0.905531	0.897708	2.2007e-10	-0.145947	0.467604
ENSG00000258551	CRAT37	lncRNA	green	0.542564	0.00345658	0.0319631	0.874247	0.895688	2.77879e-10	-0.112895	0.57503
ENSG00000005249	PRKAR2B	protein_coding	green	0.569547	0.00192933	0.0380978	0.850357	0.89359	3.5227e-10	-0.0401098	0.842549
ENSG00000070601	FRMPD1	protein_coding	green	0.534993	0.00403659	-0.0104328	0.95881	0.887074	7.14023e-10	-0.155445	0.438802
ENSG00000227218	AL157935.1	lncRNA	green	0.578103	0.00158695	0.12298	0.541126	0.886779	7.36447e-10	-0.044465	0.825698
ENSG00000198223	CSF2RA	protein_coding	green	0.551241	0.00288066	0.0049402	0.980489	0.883043	1.08215e-09	-0.127577	0.525988
ENSG00000245651	AC083805.1	lncRNA	green	0.647184	0.000263693	0.248562	0.211233	0.880634	1.37746e-09	-0.0932647	0.643582
ENSG00000180730	SHISA2	protein_coding	green	0.590913	0.00117258	0.117271	0.560202	0.867516	4.71014e-09	-0.113962	0.571398
ENSG00000159374	M1AP	protein_coding	green	0.727788	1.69145e-05	0.356868	0.0676552	0.864215	6.28877e-09	-0.129291	0.520396
ENSG00000116218	NPHS2	protein_coding	green	0.532304	0.00426161	0.0395531	0.844708	0.864143	6.32796e-09	-0.0314577	0.87622
ENSG00000054179	ENTPD2	protein_coding	green	0.568387	0.00198035	0.186168	0.352503	0.86328	6.81545e-09	-0.0631761	0.754241
ENSG00000255480	AL353699.1	lncRNA	green	0.692434	6.27772e-05	0.331751	0.0909288	0.855166	1.33822e-08	0.0928323	0.645127
ENSG00000120498	TEX11	protein_coding	green	0.577154	0.00162213	0.138687	0.490265	0.851625	1.7738e-08	-0.0818888	0.684702
ENSG00000198336	MYL4	protein_coding	green	0.553918	0.00272052	0.0780043	0.698954	0.827802	9.95529e-08	-0.113734	0.572175
ENSG00000069011	PITX1	protein_coding	green	0.471081	0.0131301	0.0858676	0.670212	0.823368	1.33347e-07	-0.0292667	0.884783
ENSG00000179520	SLC17A8	protein_coding	green	0.54575	0.00323466	0.00282878	0.988827	0.810971	2.89792e-07	0.0361013	0.858119
ENSG00000113946	CLDN16	protein_coding	green	0.470182	0.0133296	0.0397272	0.844032	0.806728	3.73172e-07	-0.0843669	0.675664
ENSG00000180929	GPR62	protein_coding	green	0.5269	0.00474629	0.0228393	0.909971	0.805496	4.01144e-07	-0.0640651	0.75089
ENSG00000064300	NGFR	protein_coding	green	0.488708	0.00969182	0.0792775	0.694271	0.797238	6.42888e-07	0.0815654	0.685884
ENSG00000118194	TNNT2	protein_coding	green	0.513479	0.00615609	-0.0651975	0.746627	0.796771	6.59855e-07	0.0756713	0.707562
ENSG00000095303	PTGS1	protein_coding	green	0.490024	0.00946873	0.0612054	0.761685	0.787269	1.10504e-06	-0.158271	0.43042
ENSG00000145536	ADAMTS16	protein_coding	green	0.496522	0.00842878	0.0462198	0.818929	0.786858	1.12925e-06	-0.0924636	0.646446
ENSG00000197301	AC090673.1	lncRNA	green	0.789299	9.9195e-07	0.535461	0.00399847	0.782319	1.43097e-06	-0.0224284	0.911584
ENSG00000167106	FAM102A	protein_coding	green	0.61106	0.00070969	0.298074	0.131013	0.781595	1.48524e-06	0.0961	0.633485
ENSG00000148948	LRRC4C	protein_coding	green	0.632988	0.000394884	0.0148098	0.941554	0.780895	1.53955e-06	0.398273	0.039631
ENSG00000204173	LRRC37A5P	transcribed_unprocessed_pseudogene	green	0.573128	0.00177901	0.0837187	0.678024	0.780867	1.54172e-06	0.0763032	0.705227
ENSG00000049323	LTBP1	protein_coding	green	0.40597	0.0356314	0.0135387	0.946563	0.780573	1.56507e-06	-0.163157	0.416136
ENSG00000075035	WSCD2	protein_coding	green	0.480839	0.0111198	0.114755	0.568706	0.777672	1.81308e-06	-0.0303897	0.880392
ENSG00000271849	AC012603.1	lncRNA	green	0.723947	1.96904e-05	0.477382	0.0118004	0.767997	2.91654e-06	-0.0659829	0.743675
ENSG00000270906	MTND4P35	processed_pseudogene	green	0.516875	0.00576967	0.0460801	0.819467	0.76525	3.32434e-06	-0.0415523	0.83696
ENSG00000108576	SLC6A4	protein_coding	green	0.481046	0.0110801	0.107324	0.594153	0.76428	3.48022e-06	-0.043546	0.829247
ENSG00000258837	AL133370.1	lncRNA	green	0.431325	0.0246826	0.198059	0.322026	0.75574	5.16157e-06	-0.0123099	0.951407
ENSG00000248278	SUMO2P17	transcribed_processed_pseudogene	green	0.438246	0.0222258	0.132934	0.50861	0.755476	5.22338e-06	-0.10694	0.595483
ENSG00000182366	FAM87A	lncRNA	green	0.582968	0.0014167	0.326144	0.0968628	0.754126	5.5508e-06	-0.218907	0.272632
ENSG00000279036	AC015656.1	TEC	green	0.600435	0.000928679	0.306817	0.119555	0.748762	7.04094e-06	0.160007	0.425314
ENSG00000258215	AC078886.1	processed_pseudogene	green	0.431279	0.0246993	0.167762	0.402918	0.74555	8.09586e-06	0.0249098	0.901846
ENSG00000226051	ZNF503-AS1	lncRNA	green	0.474165	0.0124646	-0.0299804	0.881992	0.745242	8.20403e-06	-0.130106	0.51775
ENSG00000165272	AQP3	protein_coding	green	0.518465	0.00559584	0.295127	0.13505	0.741354	9.68598e-06	-0.164433	0.412451
ENSG00000170409	AC091390.1	unprocessed_pseudogene	green	0.619692	0.000566362	0.261918	0.18692	0.741084	9.7975e-06	0.110184	0.584303
ENSG00000225630	MTND2P28	unprocessed_pseudogene	green	0.557208	0.00253415	0.068053	0.735912	0.737405	1.1432e-05	-0.0129911	0.948722
ENSG00000226798	AL138749.1	lncRNA	green	0.450057	0.0184958	0.0580484	0.773654	0.736778	1.17339e-05	-0.121698	0.545382
ENSG00000259023	LINC00524	lncRNA	green	0.443624	0.0204579	-0.032109	0.873678	0.732066	1.42382e-05	-0.00490024	0.980647
ENSG00000271659	AL161729.4	lncRNA	green	0.655675	0.000205075	0.313626	0.111154	0.727942	1.68108e-05	0.324291	0.0988866
ENSG00000256779	AP002383.4	transcribed_processed_pseudogene	green	0.489128	0.00962009	0.15316	0.445641	0.723515	2.00267e-05	-0.139164	0.488761
ENSG00000238188	AL049733.1	processed_pseudogene	green	0.562968	0.00223416	0.110631	0.582769	0.721293	2.18394e-05	0.155855	0.437579
ENSG00000172425	TTC36	protein_coding	green	0.483714	0.010579	0.0573034	0.776486	0.719375	2.35192e-05	0.0459252	0.820064
ENSG00000263155	MYZAP	protein_coding	green	0.406586	0.0353257	0.173985	0.385437	0.702059	4.47472e-05	-0.102457	0.611079
ENSG00000101405	OXT	protein_coding	green	0.484944	0.0103545	0.130977	0.514927	0.701913	4.49817e-05	-0.103119	0.608766
ENSG00000156414	TDRD9	protein_coding	green	0.452439	0.0178098	0.2727	0.168764	0.700497	4.73162e-05	-0.0634091	0.753362
ENSG00000279353	AP001324.3	TEC	green	0.589285	0.00121938	0.270344	0.17262	0.700394	4.74915e-05	0.0372254	0.853747
ENSG00000196074	SYCP2	protein_coding	green	0.460882	0.0155443	0.0788285	0.695921	0.695848	5.57557e-05	-0.106992	0.595302
ENSG00000172061	LRRC15	protein_coding	green	0.749664	6.76776e-06	0.603576	0.000858544	0.694551	5.83369e-05	-0.0982495	0.625872
[truncated: 498 more rows]

## Sheet: KICH_T
geneId	geneSymbol	geneBiotype	moduleColor	GS.stage_tnm_T	p.GS.stage_tnm_T	MM.darkgreen	p.MM.darkgreen	MM.cyan	p.MM.cyan	MM.red	p.MM.red
[truncated: 569 more rows]
